# Supplementary material for: Transcription factors of Schizophyllum commune involved in mushroom formation and modulation of vegetative growth
Source: PubMed Central journal article supplement (PMC5428507; doi:10.1038/s41598-017-00483-3), 2017-03-22
Supplement: 41598_2017_483_MOESM1_ESM.pdf [file 41598_2017_483_MOESM1_ESM.pdf]

## Supplementary Information

### Transcription factors of *Schizophyllum commune* involved in mushroom formation and modulation of vegetative growth

Jordi F Pelkmans, Mohini B Patil, Thies Gehrman, Marcel JT Reinders, Han A.B. Wösten, and Luis G. Lugones

**Supplementary Table S1.** Impact of deletion of transcription factor genes. Number of genes significantly up- and downregulated compared to wildtype at the moment the wild-type had formed aggregates (AG) and fruiting bodies (FB). Analysis is based on biological duplicates.

|                   | Upregulated |      | Downregulated |      |
|-------------------|-------------|------|---------------|------|
|                   | AG          | FB   | AG            | FB   |
| <i>Δwc1Δwc1</i>   | 415         | 1195 | 431           | 1298 |
| <i>Δwc2Δwc2</i>   | 375         | 1392 | 500           | 1421 |
| <i>Δhom2Δhom2</i> | 494         | 1267 | 652           | 1462 |
| <i>Δfst4Δfst4</i> | 1267        | 1150 | 1226          | 1330 |
| <i>Δc2h2Δc2h2</i> | 668         | 306  | 644           | 327  |
| <i>Δfst3Δfst3</i> | 400         | 86   | 482           | 131  |
| <i>Δhom1Δhom1</i> | 194         | 317  | 247           | 400  |
| <i>Δgat1Δgat1</i> | 480         | 662  | 556           | 991  |

**Supplementary Table S2.** Impact of deletion of transcription factor genes on whole genome expression. Enrichment of GO terms in up- and downregulated genes of 8-day-old colonies of  $\Delta wc-1\Delta wc-1$  and transcription factor deletion strains  $\Delta wc-2\Delta wc-2$ ,  $\Delta hom2\Delta hom2$ ,  $\Delta fst4\Delta fst4$ ,  $\Delta c2h2\Delta c2h2$ ,  $\Delta fst3\Delta fst3$ ,  $\Delta hom1\Delta hom1$ ,  $\Delta gat1\Delta gat1$ , and  $\Delta bril\Delta bril$  when compared to the aggregating wild-type strain. Analysis is based on biological duplicates.

| <b><math>\Delta wc-1\Delta wc-1</math></b> |                                                                 |                                       |                                               |
|--------------------------------------------|-----------------------------------------------------------------|---------------------------------------|-----------------------------------------------|
| Up-regulated genes in mutant strain        |                                                                 | Down-regulated genes in mutant strain |                                               |
| GO term                                    | Functional annotation                                           | GO term                               | Functional annotation                         |
| 0005975                                    | carbohydrate metabolic process                                  | 0004497                               | oxidoreductase activity                       |
| 0004553                                    | hydrolase activity, hydrolyzing O-glycosyl compounds            | 0015171                               | monooxygenase activity                        |
| 0008643                                    | carbohydrate transport                                          | 0006865                               | amino acid transmembrane transporter activity |
| 0008643                                    | L-arabinose isomerase activity                                  | 0016491                               | electron transport                            |
| 0005351                                    | sugar:hydrogen symporter activity                               | 0005618                               | amino acid transport                          |
| 0016810                                    | hydrolase activity, acting on carbon-nitrogen (but not peptide) | 0006118                               | metabolic process                             |
| 0005506                                    | iron ion binding                                                | 0005199                               | glutathione transferase activity              |
| 0016614                                    | oxidoreductase activity, acting on CH-OH group of donors        | 0004194                               | structural constituent of cell wall           |
| 0009082                                    | branched chain family amino acid biosynthetic process           | 0006810                               | cell wall                                     |
| 0008812                                    | choline dehydrogenase activity                                  |                                       |                                               |
| <b><math>\Delta wc-2\Delta wc-2</math></b> |                                                                 |                                       |                                               |
| Up-regulated genes in mutant strain        |                                                                 | Down-regulated genes in mutant strain |                                               |
| GO term                                    | Functional annotation                                           | GO term                               | Functional annotation                         |
| 0005975                                    | carbohydrate metabolic process                                  | 0016491                               | oxidoreductase activity                       |
| 0004553                                    | hydrolase activity, hydrolyzing O-glycosyl compounds            | 0004497                               | monooxygenase activity                        |
| 0005506                                    | iron ion binding                                                | 0043039                               | amino acid transmembrane transporter activity |
| 0004497                                    | monooxygenase activity                                          | 0006118                               | electron transport                            |
| 0050381                                    | unspecific monooxygenase activity                               | 0006865                               | amino acid transport                          |
| 0020037                                    | heme binding                                                    | 0008152                               | metabolic process                             |
| 0016614                                    | oxidoreductase activity, acting on CH-OH group of donors        | 0004364                               | glutathione transferase activity              |
| 0008812                                    | choline dehydrogenase activity                                  | 0005199                               | structural constituent of cell wall           |
| 0009082                                    | branched chain family amino acid biosynthetic process           | 0005618                               | cell wall                                     |
| 0006066                                    | alcohol metabolic process                                       | 0050162                               | oxalate oxidase activity                      |
| <b><math>\Delta hom2\Delta hom2</math></b> |                                                                 |                                       |                                               |
| Up-regulated genes in mutant strain        |                                                                 | Down-regulated genes in mutant strain |                                               |
| GO term                                    | Functional annotation                                           | GO term                               | Functional annotation                         |

|         |                                                      |         |                                                          |
|---------|------------------------------------------------------|---------|----------------------------------------------------------|
| 0005975 | carbohydrate metabolic process                       | 0004497 | monooxygenase activity                                   |
| 0004553 | hydrolase activity, hydrolyzing O-glycosyl compounds | 0006810 | transport                                                |
| 0030246 | carbohydrate binding                                 | 0020037 | heme binding                                             |
| 0016491 | oxidoreductase activity                              | 0006118 | electron transport                                       |
| 0003824 | catalytic activity                                   | 0005215 | transporter activity                                     |
| 0005215 | transporter activity                                 | 0050381 | unspecific monooxygenase activity                        |
| 0008152 | metabolic process                                    | 0005506 | iron ion binding                                         |
| 0016021 | integral to membrane                                 | 0015171 | amino acid transmembrane transporter activity            |
| 0008422 | beta-glucosidase activity                            | 0006865 | amino acid transport                                     |
| 0006118 | electron transport                                   | 0016614 | oxidoreductase activity, acting on CH-OH group of donors |

***Δfst4Δfst4***

| Up-regulated genes in mutant strain |                                                      | Down-regulated genes in mutant strain |                                    |
|-------------------------------------|------------------------------------------------------|---------------------------------------|------------------------------------|
| GO term                             | Functional annotation                                | GO term                               | Functional annotation              |
| 0005975                             | carbohydrate metabolic process                       | 0005524                               | ATP binding                        |
| 0008733                             | L-arabinose isomerase activity                       | 0003677                               | DNA binding                        |
| 0005351                             | sugar:hydrogen symporter activity                    | 0000166                               | nucleotide binding                 |
| 0008643                             | carbohydrate transport                               | 0008152                               | metabolic process                  |
| 0005215                             | transporter activity                                 | 0005737                               | cytoplasm                          |
| 0006810                             | transport                                            | 0017111                               | nucleoside-triphosphatase activity |
| 0004553                             | hydrolase activity, hydrolyzing O-glycosyl compounds | 0016491                               | oxidoreductase activity            |
| 0016021                             | integral to membrane                                 | 0003824                               | catalytic activity                 |
| 0030246                             | carbohydrate binding                                 | 0016887                               | ATPase activity                    |
| 0015171                             | amino acid transmembrane transporter activity        | 0005643                               | nuclear pore                       |

***Δc2h2Δc2h2***

| Up-regulated genes in mutant strain |                                                      | Down-regulated genes in mutant strain |                         |
|-------------------------------------|------------------------------------------------------|---------------------------------------|-------------------------|
| GO term                             | Functional annotation                                | GO term                               | Functional annotation   |
| 0005506                             | iron ion binding                                     | 0005737                               | cytoplasm               |
| 0004497                             | monooxygenase activity                               | 0005524                               | ATP binding             |
| 0006118                             | electron transport                                   | 0008152                               | metabolic process       |
| 0004553                             | hydrolase activity, hydrolyzing O-glycosyl compounds | 0003824                               | catalytic activity      |
| 0020037                             | heme binding                                         | 0016491                               | oxidoreductase activity |

|         |                                   |         |                                    |
|---------|-----------------------------------|---------|------------------------------------|
| 0008733 | L-arabinose isomerase activity    | 0044267 | cellular protein metabolic process |
| 0050381 | unspecific monooxygenase activity | 0000786 | nucleosome                         |
| 0005351 | sugar:hydrogen symporter activity | 0006334 | nucleosome assembly                |
| 0050660 | FAD binding                       | 0004298 | threonine endopeptidase activity   |
| 0008643 | carbohydrate transport            | 0004299 | proteasome endopeptidase activity  |

***Δfst3Δfst3***

| Up-regulated genes in mutant strain |                                                                  | Down-regulated genes in mutant strain |                                                      |
|-------------------------------------|------------------------------------------------------------------|---------------------------------------|------------------------------------------------------|
| GO term                             | Functional annotation                                            | GO term                               | Functional annotation                                |
| 0005199                             | structural constituent of cell wall                              | 0005506                               | iron ion binding                                     |
| 0005618                             | cell wall                                                        | 0004497                               | monooxygenase activity                               |
| 0016491                             | oxidoreductase activity                                          | 0020037                               | heme binding                                         |
| 0008152                             | metabolic process                                                | 0005975                               | carbohydrate metabolic process                       |
| 0050660                             | FAD binding                                                      | 0006118                               | electron transport                                   |
| 0016614                             | oxidoreductase activity, acting on CH-OH group of donors         | 0004553                               | hydrolase activity, hydrolyzing O-glycosyl compounds |
| 0033754                             | indoleamine 2,3-dioxygenase activity                             | 0050381                               | unspecific monooxygenase activity                    |
| 0016717                             | oxidoreductase activity, acting on paired donors, with oxidation | 0004568                               | chitinase activity                                   |
| 0020037                             | heme binding                                                     | 0008843                               | endochitinase activity                               |
| 0005215                             | transporter activity                                             | 0006032                               | chitin catabolic process                             |

***Δhom1Δhom1***

| Up-regulated genes in mutant strain |                       | Down-regulated genes in mutant strain |                                                      |
|-------------------------------------|-----------------------|---------------------------------------|------------------------------------------------------|
| GO term                             | Functional annotation | GO term                               | Functional annotation                                |
|                                     | NONE                  | 0004568                               | chitinase activity                                   |
|                                     |                       | 0008843                               | endochitinase activity                               |
|                                     |                       | 0004497                               | monooxygenase activity                               |
|                                     |                       | 0016491                               | oxidoreductase activity                              |
|                                     |                       | 0005975                               | carbohydrate metabolic process                       |
|                                     |                       | 0004553                               | hydrolase activity, hydrolyzing O-glycosyl compounds |
|                                     |                       | 0008115                               | sarcosine oxidase activity                           |
|                                     |                       | 0006118                               | electron transport                                   |
|                                     |                       | 0006032                               | chitin catabolic process                             |
|                                     |                       | 0006725                               | aromatic compound metabolic process                  |

***Δgat1Δgat1***

| Up-regulated genes in mutant strain |                                                          | Down-regulated genes in mutant strain |                                                      |
|-------------------------------------|----------------------------------------------------------|---------------------------------------|------------------------------------------------------|
| GO term                             | Functional annotation                                    | GO term                               | Functional annotation                                |
| 0005199                             | structural constituent of cell wall                      | 0005975                               | carbohydrate metabolic process                       |
| 0005618                             | cell wall                                                | 0005506                               | iron ion binding                                     |
| 0016491                             | oxidoreductase activity                                  | 0020037                               | heme binding                                         |
| 0008152                             | metabolic process                                        | 0006118                               | electron transport                                   |
| 0004497                             | monooxygenase activity                                   | 0004497                               | monooxygenase activity                               |
| 0050660                             | FAD binding                                              | 0005524                               | ATP binding                                          |
| 0020037                             | heme binding                                             | 0004316                               | 3-oxoacyl-[acyl-carrier-protein] reductase activity  |
| 0033754                             | indoleamine 2,3-dioxygenase activity                     | 0004553                               | hydrolase activity, hydrolyzing O-glycosyl compounds |
| 0016614                             | oxidoreductase activity, acting on CH-OH group of donors | 0050381                               | unspecific monooxygenase activity                    |
| 0006118                             | electron transport                                       | 0005215                               | transporter activity                                 |

***Δbri1Δbri1***

| Up-regulated genes in mutant strain |                       | Down-regulated genes in mutant strain |                                     |
|-------------------------------------|-----------------------|---------------------------------------|-------------------------------------|
| GO term                             | Functional annotation | GO term                               | Functional annotation               |
|                                     | NONE                  | 0008152                               | metabolic process                   |
|                                     |                       | 0005975                               | carbohydrate metabolic process      |
|                                     |                       | 0003824                               | catalytic activity                  |
|                                     |                       | 0000786                               | nucleosome                          |
|                                     |                       | 0005215                               | transporter activity                |
|                                     |                       | 0005199                               | structural constituent of cell wall |
|                                     |                       | 0006334                               | nucleosome assembly                 |
|                                     |                       | 0005618                               | cell wall                           |
|                                     |                       | 0006810                               | transport                           |
|                                     |                       | 0016491                               | oxidoreductase activity             |

**Supplementary Table S3.** Genes differentially expressed in dikaryotic transcription factor deletion strains of *S. commune*. Analysis is based on biological duplicates.

| Strain | Colony age | Protein ID | Up- / Down | Go Accession | Q value  | Description          |
|--------|------------|------------|------------|--------------|----------|----------------------|
| Δbri1  | 8-day      | 1147022    | down       | GO:0008152   | 2,59E-07 | metabolic process    |
| Δbri1  | 8-day      | 1193333    | down       | GO:0008152   | 2,59E-07 | metabolic process    |
| Δbri1  | 8-day      | 2213880    | down       | GO:0008152   | 2,59E-07 | metabolic process    |
| Δbri1  | 8-day      | 2499736    | down       | GO:0008152   | 2,59E-07 | metabolic process    |
| Δbri1  | 8-day      | 2505594    | down       | GO:0008152   | 2,59E-07 | metabolic process    |
| Δbri1  | 8-day      | 2508441    | down       | GO:0008152   | 2,59E-07 | metabolic process    |
| Δbri1  | 8-day      | 2512248    | down       | GO:0008152   | 2,59E-07 | metabolic process    |
| Δbri1  | 8-day      | 2534187    | down       | GO:0008152   | 2,59E-07 | metabolic process    |
| Δbri1  | 8-day      | 2556971    | down       | GO:0008152   | 2,59E-07 | metabolic process    |
| Δbri1  | 8-day      | 2589496    | down       | GO:0008152   | 2,59E-07 | metabolic process    |
| Δbri1  | 8-day      | 2601905    | down       | GO:0008152   | 2,59E-07 | metabolic process    |
| Δbri1  | 8-day      | 2604917    | down       | GO:0008152   | 2,59E-07 | metabolic process    |
| Δbri1  | 8-day      | 2615529    | down       | GO:0008152   | 2,59E-07 | metabolic process    |
| Δbri1  | 8-day      | 2630824    | down       | GO:0008152   | 2,59E-07 | metabolic process    |
| Δbri1  | 8-day      | 2641520    | down       | GO:0008152   | 2,59E-07 | metabolic process    |
| Δbri1  | 8-day      | 2642124    | down       | GO:0008152   | 2,59E-07 | metabolic process    |
| Δbri1  | 8-day      | 2642185    | down       | GO:0008152   | 2,59E-07 | metabolic process    |
| Δbri1  | 8-day      | 2673857    | down       | GO:0008152   | 2,59E-07 | metabolic process    |
| Δbri1  | 8-day      | 2690641    | down       | GO:0008152   | 2,59E-07 | metabolic process    |
| Δbri1  | 8-day      | 2738806    | down       | GO:0008152   | 2,59E-07 | metabolic process    |
| Δbri1  | 8-day      | 2746577    | down       | GO:0008152   | 2,59E-07 | metabolic process    |
| Δbri1  | 8-day      | 1129508    | down       | GO:0005215   | 3,04E-07 | transporter activity |
| Δbri1  | 8-day      | 2515031    | down       | GO:0005215   | 3,04E-07 | transporter activity |
| Δbri1  | 8-day      | 2550918    | down       | GO:0005215   | 3,04E-07 | transporter activity |
| Δbri1  | 8-day      | 2600551    | down       | GO:0005215   | 3,04E-07 | transporter activity |
| Δbri1  | 8-day      | 2616189    | down       | GO:0005215   | 3,04E-07 | transporter activity |
| Δbri1  | 8-day      | 2630802    | down       | GO:0005215   | 3,04E-07 | transporter activity |
| Δbri1  | 8-day      | 2637509    | down       | GO:0005215   | 3,04E-07 | transporter activity |

|       |       |         |      |            |          |                                |
|-------|-------|---------|------|------------|----------|--------------------------------|
| Δbri1 | 8-day | 2642553 | down | GO:0005215 | 3,04E-07 | transporter activity           |
| Δbri1 | 8-day | 2704067 | down | GO:0005215 | 3,04E-07 | transporter activity           |
| Δbri1 | 8-day | 15462   | down | GO:0005975 | 7,16E-07 | carbohydrate metabolic process |
| Δbri1 | 8-day | 73246   | down | GO:0005975 | 7,16E-07 | carbohydrate metabolic process |
| Δbri1 | 8-day | 2499969 | down | GO:0005975 | 7,16E-07 | carbohydrate metabolic process |
| Δbri1 | 8-day | 2557656 | down | GO:0005975 | 7,16E-07 | carbohydrate metabolic process |
| Δbri1 | 8-day | 2570936 | down | GO:0005975 | 7,16E-07 | carbohydrate metabolic process |
| Δbri1 | 8-day | 2609957 | down | GO:0005975 | 7,16E-07 | carbohydrate metabolic process |
| Δbri1 | 8-day | 2613657 | down | GO:0005975 | 7,16E-07 | carbohydrate metabolic process |
| Δbri1 | 8-day | 2621806 | down | GO:0005975 | 7,16E-07 | carbohydrate metabolic process |
| Δbri1 | 8-day | 2628008 | down | GO:0005975 | 7,16E-07 | carbohydrate metabolic process |
| Δbri1 | 8-day | 2645822 | down | GO:0005975 | 7,16E-07 | carbohydrate metabolic process |
| Δbri1 | 8-day | 2645945 | down | GO:0005975 | 7,16E-07 | carbohydrate metabolic process |
| Δbri1 | 8-day | 2686544 | down | GO:0005975 | 7,16E-07 | carbohydrate metabolic process |
| Δbri1 | 8-day | 2706631 | down | GO:0005975 | 7,16E-07 | carbohydrate metabolic process |
| Δbri1 | 8-day | 1129508 | down | GO:0006810 | 7,85E-06 | transport                      |
| Δbri1 | 8-day | 1342503 | down | GO:0006810 | 7,85E-06 | transport                      |
| Δbri1 | 8-day | 2515031 | down | GO:0006810 | 7,85E-06 | transport                      |
| Δbri1 | 8-day | 2524154 | down | GO:0006810 | 7,85E-06 | transport                      |
| Δbri1 | 8-day | 2550918 | down | GO:0006810 | 7,85E-06 | transport                      |
| Δbri1 | 8-day | 2600551 | down | GO:0006810 | 7,85E-06 | transport                      |
| Δbri1 | 8-day | 2616189 | down | GO:0006810 | 7,85E-06 | transport                      |
| Δbri1 | 8-day | 2630802 | down | GO:0006810 | 7,85E-06 | transport                      |
| Δbri1 | 8-day | 2637509 | down | GO:0006810 | 7,85E-06 | transport                      |
| Δbri1 | 8-day | 2704067 | down | GO:0006810 | 7,85E-06 | transport                      |
| Δbri1 | 8-day | 2746577 | down | GO:0006810 | 7,85E-06 | transport                      |
| Δbri1 | 8-day | 2749926 | down | GO:0006810 | 7,85E-06 | transport                      |
| Δbri1 | 8-day | 1147022 | down | GO:0003824 | 1,25E-05 | catalytic activity             |
| Δbri1 | 8-day | 1160309 | down | GO:0003824 | 1,25E-05 | catalytic activity             |
| Δbri1 | 8-day | 1193333 | down | GO:0003824 | 1,25E-05 | catalytic activity             |
| Δbri1 | 8-day | 2499736 | down | GO:0003824 | 1,25E-05 | catalytic activity             |
| Δbri1 | 8-day | 2556971 | down | GO:0003824 | 1,25E-05 | catalytic activity             |
| Δbri1 | 8-day | 2557656 | down | GO:0003824 | 1,25E-05 | catalytic activity             |
| Δbri1 | 8-day | 2570936 | down | GO:0003824 | 1,25E-05 | catalytic activity             |

|       |       |         |      |            |             |                                     |
|-------|-------|---------|------|------------|-------------|-------------------------------------|
| Δbri1 | 8-day | 2606333 | down | GO:0003824 | 1,25E-05    | catalytic activity                  |
| Δbri1 | 8-day | 2615529 | down | GO:0003824 | 1,25E-05    | catalytic activity                  |
| Δbri1 | 8-day | 2628008 | down | GO:0003824 | 1,25E-05    | catalytic activity                  |
| Δbri1 | 8-day | 2631920 | down | GO:0003824 | 1,25E-05    | catalytic activity                  |
| Δbri1 | 8-day | 2641520 | down | GO:0003824 | 1,25E-05    | catalytic activity                  |
| Δbri1 | 8-day | 2642124 | down | GO:0003824 | 1,25E-05    | catalytic activity                  |
| Δbri1 | 8-day | 2642438 | down | GO:0003824 | 1,25E-05    | catalytic activity                  |
| Δbri1 | 8-day | 2673857 | down | GO:0003824 | 1,25E-05    | catalytic activity                  |
| Δbri1 | 8-day | 2690641 | down | GO:0003824 | 1,25E-05    | catalytic activity                  |
| Δbri1 | 8-day | 2746577 | down | GO:0003824 | 1,25E-05    | catalytic activity                  |
| Δbri1 | 8-day | 2633783 | down | GO:0000786 | 2,35E-05    | nucleosome                          |
| Δbri1 | 8-day | 2629603 | down | GO:0005199 | 3,04E-05    | structural constituent of cell wall |
| Δbri1 | 8-day | 2629603 | down | GO:0005618 | 4,41E-05    | cell wall                           |
| Δbri1 | 8-day | 2633783 | down | GO:0006334 | 4,41E-05    | nucleosome assembly                 |
| Δbri1 | 8-day | 1147022 | down | GO:0016491 | 7,01E-05    | oxidoreductase activity             |
| Δbri1 | 8-day | 1160309 | down | GO:0016491 | 7,01E-05    | oxidoreductase activity             |
| Δbri1 | 8-day | 1194451 | down | GO:0016491 | 7,01E-05    | oxidoreductase activity             |
| Δbri1 | 8-day | 2213880 | down | GO:0016491 | 7,01E-05    | oxidoreductase activity             |
| Δbri1 | 8-day | 2481224 | down | GO:0016491 | 7,01E-05    | oxidoreductase activity             |
| Δbri1 | 8-day | 2490518 | down | GO:0016491 | 7,01E-05    | oxidoreductase activity             |
| Δbri1 | 8-day | 2499736 | down | GO:0016491 | 7,01E-05    | oxidoreductase activity             |
| Δbri1 | 8-day | 2504654 | down | GO:0016491 | 7,01E-05    | oxidoreductase activity             |
| Δbri1 | 8-day | 2511616 | down | GO:0016491 | 7,01E-05    | oxidoreductase activity             |
| Δbri1 | 8-day | 2517867 | down | GO:0016491 | 7,01E-05    | oxidoreductase activity             |
| Δbri1 | 8-day | 2534187 | down | GO:0016491 | 7,01E-05    | oxidoreductase activity             |
| Δbri1 | 8-day | 2556971 | down | GO:0016491 | 7,01E-05    | oxidoreductase activity             |
| Δbri1 | 8-day | 2603449 | down | GO:0016491 | 7,01E-05    | oxidoreductase activity             |
| Δbri1 | 8-day | 2615184 | down | GO:0016491 | 7,01E-05    | oxidoreductase activity             |
| Δbri1 | 8-day | 2618220 | down | GO:0016491 | 7,01E-05    | oxidoreductase activity             |
| Δbri1 | 8-day | 2622733 | down | GO:0016491 | 7,01E-05    | oxidoreductase activity             |
| Δbri1 | 8-day | 2639682 | down | GO:0016491 | 7,01E-05    | oxidoreductase activity             |
| Δbri1 | 8-day | 2641520 | down | GO:0016491 | 7,01E-05    | oxidoreductase activity             |
| Δbri1 | 8-day | 2642438 | down | GO:0016491 | 7,01E-05    | oxidoreductase activity             |
| Δbri1 | 8-day | 2521109 | down | GO:0008236 | 0,000330993 | serine-type peptidase activity      |



|       |       |         |      |            |             |                                                      |
|-------|-------|---------|------|------------|-------------|------------------------------------------------------|
| Δbri1 | 8-day | 2627176 | down | GO:0008236 | 0,000330993 | serine-type peptidase activity                       |
| Δbri1 | 8-day | 1129508 | down | GO:0016021 | 0,000914733 | integral to membrane                                 |
| Δbri1 | 8-day | 2515031 | down | GO:0016021 | 0,000914733 | integral to membrane                                 |
| Δbri1 | 8-day | 2524154 | down | GO:0016021 | 0,000914733 | integral to membrane                                 |
| Δbri1 | 8-day | 2550918 | down | GO:0016021 | 0,000914733 | integral to membrane                                 |
| Δbri1 | 8-day | 2603449 | down | GO:0016021 | 0,000914733 | integral to membrane                                 |
| Δbri1 | 8-day | 2616189 | down | GO:0016021 | 0,000914733 | integral to membrane                                 |
| Δbri1 | 8-day | 2625385 | down | GO:0016021 | 0,000914733 | integral to membrane                                 |
| Δbri1 | 8-day | 2637509 | down | GO:0016021 | 0,000914733 | integral to membrane                                 |
| Δbri1 | 8-day | 2704067 | down | GO:0016021 | 0,000914733 | integral to membrane                                 |
| Δbri1 | 8-day | 2746577 | down | GO:0016021 | 0,000914733 | integral to membrane                                 |
| Δbri1 | 8-day | 2515031 | down | GO:0008733 | 0,002012671 | L-arabinose isomerase activity                       |
| Δbri1 | 8-day | 2550918 | down | GO:0008733 | 0,002012671 | L-arabinose isomerase activity                       |
| Δbri1 | 8-day | 2616189 | down | GO:0008733 | 0,002012671 | L-arabinose isomerase activity                       |
| Δbri1 | 8-day | 2704067 | down | GO:0008733 | 0,002012671 | L-arabinose isomerase activity                       |
| Δbri1 | 8-day | 15462   | down | GO:0004553 | 0,002945589 | hydrolase activity, hydrolyzing O-glycosyl compounds |
| Δbri1 | 8-day | 73246   | down | GO:0004553 | 0,002945589 | hydrolase activity, hydrolyzing O-glycosyl compounds |
| Δbri1 | 8-day | 2499969 | down | GO:0004553 | 0,002945589 | hydrolase activity, hydrolyzing O-glycosyl compounds |
| Δbri1 | 8-day | 2609957 | down | GO:0004553 | 0,002945589 | hydrolase activity, hydrolyzing O-glycosyl compounds |
| Δbri1 | 8-day | 2613657 | down | GO:0004553 | 0,002945589 | hydrolase activity, hydrolyzing O-glycosyl compounds |
| Δbri1 | 8-day | 2621806 | down | GO:0004553 | 0,002945589 | hydrolase activity, hydrolyzing O-glycosyl compounds |
| Δbri1 | 8-day | 2645822 | down | GO:0004553 | 0,002945589 | hydrolase activity, hydrolyzing O-glycosyl compounds |
| Δbri1 | 8-day | 2686544 | down | GO:0004553 | 0,002945589 | hydrolase activity, hydrolyzing O-glycosyl compounds |
| Δbri1 | 8-day | 2706631 | down | GO:0004553 | 0,002945589 | hydrolase activity, hydrolyzing O-glycosyl compounds |
| Δbri1 | 8-day | 2637509 | down | GO:0015520 | 0,002945589 | tetracycline:hydrogen antiporter activity            |
| Δbri1 | 8-day | 2637509 | down | GO:0015904 | 0,002945589 | tetracycline transport                               |
| Δbri1 | 8-day | 81631   | down | GO:0005506 | 0,006473026 | iron ion binding                                     |
| Δbri1 | 8-day | 1188937 | down | GO:0005506 | 0,006473026 | iron ion binding                                     |
| Δbri1 | 8-day | 2537529 | down | GO:0005506 | 0,006473026 | iron ion binding                                     |
| Δbri1 | 8-day | 2583618 | down | GO:0005506 | 0,006473026 | iron ion binding                                     |
| Δbri1 | 8-day | 2603449 | down | GO:0005506 | 0,006473026 | iron ion binding                                     |
| Δbri1 | 8-day | 2618220 | down | GO:0005506 | 0,006473026 | iron ion binding                                     |
| Δbri1 | 8-day | 2633776 | down | GO:0005506 | 0,006473026 | iron ion binding                                     |
| Δbri1 | 8-day | 2635487 | down | GO:0005506 | 0,006473026 | iron ion binding                                     |

|       |       |         |      |            |             |                                   |
|-------|-------|---------|------|------------|-------------|-----------------------------------|
| Δbri1 | 8-day | 75642   | down | GO:0006508 | 0,006473026 | proteolysis                       |
| Δbri1 | 8-day | 2009250 | down | GO:0006508 | 0,006473026 | proteolysis                       |
| Δbri1 | 8-day | 2508594 | down | GO:0006508 | 0,006473026 | proteolysis                       |
| Δbri1 | 8-day | 2521045 | down | GO:0006508 | 0,006473026 | proteolysis                       |
| Δbri1 | 8-day | 2521109 | down | GO:0006508 | 0,006473026 | proteolysis                       |
| Δbri1 | 8-day | 2627176 | down | GO:0006508 | 0,006473026 | proteolysis                       |
| Δbri1 | 8-day | 2636358 | down | GO:0006508 | 0,006473026 | proteolysis                       |
| Δbri1 | 8-day | 2515031 | down | GO:0008643 | 0,00821797  | carbohydrate transport            |
| Δbri1 | 8-day | 2550918 | down | GO:0008643 | 0,00821797  | carbohydrate transport            |
| Δbri1 | 8-day | 2616189 | down | GO:0008643 | 0,00821797  | carbohydrate transport            |
| Δbri1 | 8-day | 2704067 | down | GO:0008643 | 0,00821797  | carbohydrate transport            |
| Δbri1 | 8-day | 2637509 | down | GO:0046677 | 0,010853578 | response to antibiotic            |
| Δbri1 | 8-day | 81631   | down | GO:0020037 | 0,010889651 | heme binding                      |
| Δbri1 | 8-day | 1188937 | down | GO:0020037 | 0,010889651 | heme binding                      |
| Δbri1 | 8-day | 2537529 | down | GO:0020037 | 0,010889651 | heme binding                      |
| Δbri1 | 8-day | 2583618 | down | GO:0020037 | 0,010889651 | heme binding                      |
| Δbri1 | 8-day | 2633776 | down | GO:0020037 | 0,010889651 | heme binding                      |
| Δbri1 | 8-day | 2635487 | down | GO:0020037 | 0,010889651 | heme binding                      |
| Δbri1 | 8-day | 2640585 | down | GO:0020037 | 0,010889651 | heme binding                      |
| Δbri1 | 8-day | 2515031 | down | GO:0005351 | 0,015681867 | sugar:hydrogen symporter activity |
| Δbri1 | 8-day | 2550918 | down | GO:0005351 | 0,015681867 | sugar:hydrogen symporter activity |
| Δbri1 | 8-day | 2616189 | down | GO:0005351 | 0,015681867 | sugar:hydrogen symporter activity |
| Δbri1 | 8-day | 2704067 | down | GO:0005351 | 0,015681867 | sugar:hydrogen symporter activity |
| Δbri1 | 8-day | 81631   | down | GO:0004497 | 0,021208348 | monooxygenase activity            |
| Δbri1 | 8-day | 1188937 | down | GO:0004497 | 0,021208348 | monooxygenase activity            |
| Δbri1 | 8-day | 2213880 | down | GO:0004497 | 0,021208348 | monooxygenase activity            |
| Δbri1 | 8-day | 2534187 | down | GO:0004497 | 0,021208348 | monooxygenase activity            |
| Δbri1 | 8-day | 2537529 | down | GO:0004497 | 0,021208348 | monooxygenase activity            |
| Δbri1 | 8-day | 2583618 | down | GO:0004497 | 0,021208348 | monooxygenase activity            |
| Δbri1 | 8-day | 2633776 | down | GO:0004497 | 0,021208348 | monooxygenase activity            |
| Δbri1 | 8-day | 2635487 | down | GO:0004497 | 0,021208348 | monooxygenase activity            |
| Δbri1 | 8-day | 2627176 | down | GO:0019131 | 0,038454236 | tripeptidyl-peptidase I activity  |
| Δc2h2 | 8-day | 2487208 | up   | GO:0005506 | 5,66E-09    | iron ion binding                  |
| Δc2h2 | 8-day | 2517480 | up   | GO:0005506 | 5,66E-09    | iron ion binding                  |

|       |       |         |    |            |          |                                                      |
|-------|-------|---------|----|------------|----------|------------------------------------------------------|
| Δc2h2 | 8-day | 2609502 | up | GO:0005506 | 5,66E-09 | iron ion binding                                     |
| Δc2h2 | 8-day | 2620407 | up | GO:0005506 | 5,66E-09 | iron ion binding                                     |
| Δc2h2 | 8-day | 2623189 | up | GO:0005506 | 5,66E-09 | iron ion binding                                     |
| Δc2h2 | 8-day | 2623701 | up | GO:0005506 | 5,66E-09 | iron ion binding                                     |
| Δc2h2 | 8-day | 2627525 | up | GO:0005506 | 5,66E-09 | iron ion binding                                     |
| Δc2h2 | 8-day | 2629864 | up | GO:0005506 | 5,66E-09 | iron ion binding                                     |
| Δc2h2 | 8-day | 2732977 | up | GO:0005506 | 5,66E-09 | iron ion binding                                     |
| Δc2h2 | 8-day | 2517480 | up | GO:0004497 | 3,52E-08 | monooxygenase activity                               |
| Δc2h2 | 8-day | 2609502 | up | GO:0004497 | 3,52E-08 | monooxygenase activity                               |
| Δc2h2 | 8-day | 2620407 | up | GO:0004497 | 3,52E-08 | monooxygenase activity                               |
| Δc2h2 | 8-day | 2623701 | up | GO:0004497 | 3,52E-08 | monooxygenase activity                               |
| Δc2h2 | 8-day | 2627525 | up | GO:0004497 | 3,52E-08 | monooxygenase activity                               |
| Δc2h2 | 8-day | 2629864 | up | GO:0004497 | 3,52E-08 | monooxygenase activity                               |
| Δc2h2 | 8-day | 2732977 | up | GO:0004497 | 3,52E-08 | monooxygenase activity                               |
| Δc2h2 | 8-day | 2607659 | up | GO:0008733 | 3,84E-08 | L-arabinose isomerase activity                       |
| Δc2h2 | 8-day | 2607659 | up | GO:0005351 | 8,96E-08 | sugar:hydrogen symporter activity                    |
| Δc2h2 | 8-day | 2610180 | up | GO:0005351 | 8,96E-08 | sugar:hydrogen symporter activity                    |
| Δc2h2 | 8-day | 2607659 | up | GO:0008643 | 1,39E-07 | carbohydrate transport                               |
| Δc2h2 | 8-day | 59565   | up | GO:0004553 | 3,93E-07 | hydrolase activity, hydrolyzing O-glycosyl compounds |
| Δc2h2 | 8-day | 2496051 | up | GO:0004553 | 3,93E-07 | hydrolase activity, hydrolyzing O-glycosyl compounds |
| Δc2h2 | 8-day | 2506813 | up | GO:0004553 | 3,93E-07 | hydrolase activity, hydrolyzing O-glycosyl compounds |
| Δc2h2 | 8-day | 2622563 | up | GO:0004553 | 3,93E-07 | hydrolase activity, hydrolyzing O-glycosyl compounds |
| Δc2h2 | 8-day | 2623407 | up | GO:0004553 | 3,93E-07 | hydrolase activity, hydrolyzing O-glycosyl compounds |
| Δc2h2 | 8-day | 2637065 | up | GO:0004553 | 3,93E-07 | hydrolase activity, hydrolyzing O-glycosyl compounds |
| Δc2h2 | 8-day | 2499521 | up | GO:0006118 | 4,03E-07 | electron transport                                   |
| Δc2h2 | 8-day | 2517480 | up | GO:0006118 | 4,03E-07 | electron transport                                   |
| Δc2h2 | 8-day | 2582924 | up | GO:0006118 | 4,03E-07 | electron transport                                   |
| Δc2h2 | 8-day | 2606221 | up | GO:0006118 | 4,03E-07 | electron transport                                   |
| Δc2h2 | 8-day | 2608235 | up | GO:0006118 | 4,03E-07 | electron transport                                   |
| Δc2h2 | 8-day | 2609502 | up | GO:0006118 | 4,03E-07 | electron transport                                   |
| Δc2h2 | 8-day | 2612998 | up | GO:0006118 | 4,03E-07 | electron transport                                   |
| Δc2h2 | 8-day | 2613466 | up | GO:0006118 | 4,03E-07 | electron transport                                   |
| Δc2h2 | 8-day | 2614499 | up | GO:0006118 | 4,03E-07 | electron transport                                   |
| Δc2h2 | 8-day | 2620407 | up | GO:0006118 | 4,03E-07 | electron transport                                   |

|               |       |         |    |            |          |                                                          |
|---------------|-------|---------|----|------------|----------|----------------------------------------------------------|
| $\Delta c2h2$ | 8-day | 2623701 | up | GO:0006118 | 4,03E-07 | electron transport                                       |
| $\Delta c2h2$ | 8-day | 2627525 | up | GO:0006118 | 4,03E-07 | electron transport                                       |
| $\Delta c2h2$ | 8-day | 2628120 | up | GO:0006118 | 4,03E-07 | electron transport                                       |
| $\Delta c2h2$ | 8-day | 2629850 | up | GO:0006118 | 4,03E-07 | electron transport                                       |
| $\Delta c2h2$ | 8-day | 2629864 | up | GO:0006118 | 4,03E-07 | electron transport                                       |
| $\Delta c2h2$ | 8-day | 2643648 | up | GO:0006118 | 4,03E-07 | electron transport                                       |
| $\Delta c2h2$ | 8-day | 2671376 | up | GO:0006118 | 4,03E-07 | electron transport                                       |
| $\Delta c2h2$ | 8-day | 2732977 | up | GO:0006118 | 4,03E-07 | electron transport                                       |
| $\Delta c2h2$ | 8-day | 2487208 | up | GO:0020037 | 1,88E-06 | heme binding                                             |
| $\Delta c2h2$ | 8-day | 2517480 | up | GO:0020037 | 1,88E-06 | heme binding                                             |
| $\Delta c2h2$ | 8-day | 2582924 | up | GO:0020037 | 1,88E-06 | heme binding                                             |
| $\Delta c2h2$ | 8-day | 2609502 | up | GO:0020037 | 1,88E-06 | heme binding                                             |
| $\Delta c2h2$ | 8-day | 2620407 | up | GO:0020037 | 1,88E-06 | heme binding                                             |
| $\Delta c2h2$ | 8-day | 2623701 | up | GO:0020037 | 1,88E-06 | heme binding                                             |
| $\Delta c2h2$ | 8-day | 2627525 | up | GO:0020037 | 1,88E-06 | heme binding                                             |
| $\Delta c2h2$ | 8-day | 2629864 | up | GO:0020037 | 1,88E-06 | heme binding                                             |
| $\Delta c2h2$ | 8-day | 2732977 | up | GO:0020037 | 1,88E-06 | heme binding                                             |
| $\Delta c2h2$ | 8-day | 59565   | up | GO:0005975 | 2,13E-06 | carbohydrate metabolic process                           |
| $\Delta c2h2$ | 8-day | 76183   | up | GO:0005975 | 2,13E-06 | carbohydrate metabolic process                           |
| $\Delta c2h2$ | 8-day | 1087819 | up | GO:0005975 | 2,13E-06 | carbohydrate metabolic process                           |
| $\Delta c2h2$ | 8-day | 2496051 | up | GO:0005975 | 2,13E-06 | carbohydrate metabolic process                           |
| $\Delta c2h2$ | 8-day | 2506813 | up | GO:0005975 | 2,13E-06 | carbohydrate metabolic process                           |
| $\Delta c2h2$ | 8-day | 2514546 | up | GO:0005975 | 2,13E-06 | carbohydrate metabolic process                           |
| $\Delta c2h2$ | 8-day | 2607436 | up | GO:0005975 | 2,13E-06 | carbohydrate metabolic process                           |
| $\Delta c2h2$ | 8-day | 2607718 | up | GO:0005975 | 2,13E-06 | carbohydrate metabolic process                           |
| $\Delta c2h2$ | 8-day | 2612062 | up | GO:0005975 | 2,13E-06 | carbohydrate metabolic process                           |
| $\Delta c2h2$ | 8-day | 2620263 | up | GO:0005975 | 2,13E-06 | carbohydrate metabolic process                           |
| $\Delta c2h2$ | 8-day | 2622563 | up | GO:0005975 | 2,13E-06 | carbohydrate metabolic process                           |
| $\Delta c2h2$ | 8-day | 2623407 | up | GO:0005975 | 2,13E-06 | carbohydrate metabolic process                           |
| $\Delta c2h2$ | 8-day | 2624588 | up | GO:0005975 | 2,13E-06 | carbohydrate metabolic process                           |
| $\Delta c2h2$ | 8-day | 2637065 | up | GO:0005975 | 2,13E-06 | carbohydrate metabolic process                           |
| $\Delta c2h2$ | 8-day | 2620407 | up | GO:0050381 | 3,10E-06 | unspecific monooxygenase activity                        |
| $\Delta c2h2$ | 8-day | 2732977 | up | GO:0050381 | 3,10E-06 | unspecific monooxygenase activity                        |
| $\Delta c2h2$ | 8-day | 1087819 | up | GO:0016614 | 3,86E-05 | oxidoreductase activity, acting on CH-OH group of donors |

|               |       |         |    |            |             |                                                    |
|---------------|-------|---------|----|------------|-------------|----------------------------------------------------|
| $\Delta c2h2$ | 8-day | 2614499 | up | GO:0050660 | 4,33E-05    | FAD binding                                        |
| $\Delta c2h2$ | 8-day | 2643648 | up | GO:0050660 | 4,33E-05    | FAD binding                                        |
| $\Delta c2h2$ | 8-day | 2488637 | up | GO:0005215 | 0,000222054 | transporter activity                               |
| $\Delta c2h2$ | 8-day | 2590808 | up | GO:0005215 | 0,000222054 | transporter activity                               |
| $\Delta c2h2$ | 8-day | 2607659 | up | GO:0005215 | 0,000222054 | transporter activity                               |
| $\Delta c2h2$ | 8-day | 2607663 | up | GO:0005215 | 0,000222054 | transporter activity                               |
| $\Delta c2h2$ | 8-day | 2611460 | up | GO:0005215 | 0,000222054 | transporter activity                               |
| $\Delta c2h2$ | 8-day | 2612474 | up | GO:0005215 | 0,000222054 | transporter activity                               |
| $\Delta c2h2$ | 8-day | 2620170 | up | GO:0005215 | 0,000222054 | transporter activity                               |
| $\Delta c2h2$ | 8-day | 2622931 | up | GO:0005215 | 0,000222054 | transporter activity                               |
| $\Delta c2h2$ | 8-day | 2628982 | up | GO:0005215 | 0,000222054 | transporter activity                               |
| $\Delta c2h2$ | 8-day | 2633596 | up | GO:0005215 | 0,000222054 | transporter activity                               |
| $\Delta c2h2$ | 8-day | 59565   | up | GO:0004568 | 0,000245859 | chitinase activity                                 |
| $\Delta c2h2$ | 8-day | 59565   | up | GO:0008843 | 0,000245859 | endochitinase activity                             |
| $\Delta c2h2$ | 8-day | 2488637 | up | GO:0006810 | 0,005134219 | transport                                          |
| $\Delta c2h2$ | 8-day | 2569288 | up | GO:0006810 | 0,005134219 | transport                                          |
| $\Delta c2h2$ | 8-day | 2576922 | up | GO:0006810 | 0,005134219 | transport                                          |
| $\Delta c2h2$ | 8-day | 2590808 | up | GO:0006810 | 0,005134219 | transport                                          |
| $\Delta c2h2$ | 8-day | 2605313 | up | GO:0006810 | 0,005134219 | transport                                          |
| $\Delta c2h2$ | 8-day | 2607659 | up | GO:0006810 | 0,005134219 | transport                                          |
| $\Delta c2h2$ | 8-day | 2607663 | up | GO:0006810 | 0,005134219 | transport                                          |
| $\Delta c2h2$ | 8-day | 2611460 | up | GO:0006810 | 0,005134219 | transport                                          |
| $\Delta c2h2$ | 8-day | 2612474 | up | GO:0006810 | 0,005134219 | transport                                          |
| $\Delta c2h2$ | 8-day | 2620170 | up | GO:0006810 | 0,005134219 | transport                                          |
| $\Delta c2h2$ | 8-day | 2620257 | up | GO:0006810 | 0,005134219 | transport                                          |
| $\Delta c2h2$ | 8-day | 2622931 | up | GO:0006810 | 0,005134219 | transport                                          |
| $\Delta c2h2$ | 8-day | 2623894 | up | GO:0006810 | 0,005134219 | transport                                          |
| $\Delta c2h2$ | 8-day | 2628982 | up | GO:0006810 | 0,005134219 | transport                                          |
| $\Delta c2h2$ | 8-day | 2633596 | up | GO:0006810 | 0,005134219 | transport                                          |
| $\Delta c2h2$ | 8-day | 2637783 | up | GO:0016831 | 0,005190225 | carboxy-lyase activity                             |
| $\Delta c2h2$ | 8-day | 59565   | up | GO:0006032 | 0,012818818 | chitin catabolic process                           |
| $\Delta c2h2$ | 8-day | 1150677 | up | GO:0051734 | 0,035764549 | ATP-dependent polynucleotide kinase activity       |
| $\Delta c2h2$ | 8-day | 1150677 | up | GO:0016538 | 0,035764549 | cyclin-dependent protein kinase regulator activity |
| $\Delta c2h2$ | 8-day | 1150677 | up | GO:0008819 | 0,035764549 | cobinamide kinase activity                         |

|       |       |         |      |            |             |                                                                      |
|-------|-------|---------|------|------------|-------------|----------------------------------------------------------------------|
| Δc2h2 | 8-day | 1150677 | up   | GO:0042556 | 0,035764549 | eukaryotic elongation factor-2 kinase regulator activity             |
| Δc2h2 | 8-day | 1150677 | up   | GO:0042557 | 0,035764549 | eukaryotic elongation factor-2 kinase activator activity             |
| Δc2h2 | 8-day | 1150677 | up   | GO:0008607 | 0,035764549 | phosphorylase kinase regulator activity                              |
| Δc2h2 | 8-day | 1150677 | up   | GO:0043841 | 0,035764549 | (S)-lactate 2-kinase activity                                        |
| Δc2h2 | 8-day | 1150677 | up   | GO:0032942 | 0,035764549 | inositol tetrakisphosphate 2-kinase activity                         |
| Δc2h2 | 8-day | 1150677 | up   | GO:0043798 | 0,035764549 | glycerate 2-kinase activity                                          |
| Δc2h2 | 8-day | 1150677 | up   | GO:0016307 | 0,035764549 | phosphatidylinositol phosphate kinase activity                       |
| Δc2h2 | 8-day | 1150677 | up   | GO:0019914 | 0,035764549 | cyclin-dependent protein kinase activating kinase regulator activity |
| Δc2h2 | 8-day | 1150677 | up   | GO:0043771 | 0,035764549 | cytidine kinase activity                                             |
| Δc2h2 | 8-day | 1150677 | up   | GO:0008443 | 0,035764549 | phosphofructokinase activity                                         |
| Δc2h2 | 8-day | 1150677 | up   | GO:0018720 | 0,035764549 | phenol kinase activity                                               |
| Δc2h2 | 8-day | 1150677 | up   | GO:0043743 | 0,035764549 | LPPG:FO 2-phospho-L-lactate transferase activity                     |
| Δc2h2 | 8-day | 1150677 | up   | GO:0051731 | 0,035764549 | polynucleotide kinase activity                                       |
| Δc2h2 | 8-day | 1150677 | up   | GO:0051735 | 0,035764549 | GTP-dependent polynucleotide kinase activity                         |
| Δc2h2 | 8-day | 1150677 | up   | GO:0035004 | 0,035764549 | phosphoinositide 3-kinase activity                                   |
| Δc2h2 | 8-day | 2488637 | up   | GO:0016021 | 0,039386229 | integral to membrane                                                 |
| Δc2h2 | 8-day | 2507178 | up   | GO:0016021 | 0,039386229 | integral to membrane                                                 |
| Δc2h2 | 8-day | 2604210 | up   | GO:0016021 | 0,039386229 | integral to membrane                                                 |
| Δc2h2 | 8-day | 2607659 | up   | GO:0016021 | 0,039386229 | integral to membrane                                                 |
| Δc2h2 | 8-day | 2607663 | up   | GO:0016021 | 0,039386229 | integral to membrane                                                 |
| Δc2h2 | 8-day | 2612474 | up   | GO:0016021 | 0,039386229 | integral to membrane                                                 |
| Δc2h2 | 8-day | 2619090 | up   | GO:0016021 | 0,039386229 | integral to membrane                                                 |
| Δc2h2 | 8-day | 2620170 | up   | GO:0016021 | 0,039386229 | integral to membrane                                                 |
| Δc2h2 | 8-day | 2622931 | up   | GO:0016021 | 0,039386229 | integral to membrane                                                 |
| Δc2h2 | 8-day | 2628982 | up   | GO:0016021 | 0,039386229 | integral to membrane                                                 |
| Δc2h2 | 8-day | 1147022 | down | GO:0008152 | 5,46E-09    | metabolic process                                                    |
| Δc2h2 | 8-day | 1156481 | down | GO:0008152 | 5,46E-09    | metabolic process                                                    |
| Δc2h2 | 8-day | 1212612 | down | GO:0008152 | 5,46E-09    | metabolic process                                                    |
| Δc2h2 | 8-day | 1332726 | down | GO:0008152 | 5,46E-09    | metabolic process                                                    |
| Δc2h2 | 8-day | 2213880 | down | GO:0008152 | 5,46E-09    | metabolic process                                                    |
| Δc2h2 | 8-day | 2373661 | down | GO:0008152 | 5,46E-09    | metabolic process                                                    |
| Δc2h2 | 8-day | 2499736 | down | GO:0008152 | 5,46E-09    | metabolic process                                                    |
| Δc2h2 | 8-day | 2501673 | down | GO:0008152 | 5,46E-09    | metabolic process                                                    |
| Δc2h2 | 8-day | 2505594 | down | GO:0008152 | 5,46E-09    | metabolic process                                                    |

|       |       |         |      |            |          |                   |
|-------|-------|---------|------|------------|----------|-------------------|
| Δc2h2 | 8-day | 2511020 | down | GO:0008152 | 5,46E-09 | metabolic process |
| Δc2h2 | 8-day | 2525914 | down | GO:0008152 | 5,46E-09 | metabolic process |
| Δc2h2 | 8-day | 2573393 | down | GO:0008152 | 5,46E-09 | metabolic process |
| Δc2h2 | 8-day | 2573396 | down | GO:0008152 | 5,46E-09 | metabolic process |
| Δc2h2 | 8-day | 2589496 | down | GO:0008152 | 5,46E-09 | metabolic process |
| Δc2h2 | 8-day | 2602078 | down | GO:0008152 | 5,46E-09 | metabolic process |
| Δc2h2 | 8-day | 2604130 | down | GO:0008152 | 5,46E-09 | metabolic process |
| Δc2h2 | 8-day | 2611306 | down | GO:0008152 | 5,46E-09 | metabolic process |
| Δc2h2 | 8-day | 2623956 | down | GO:0008152 | 5,46E-09 | metabolic process |
| Δc2h2 | 8-day | 2624569 | down | GO:0008152 | 5,46E-09 | metabolic process |
| Δc2h2 | 8-day | 2625193 | down | GO:0008152 | 5,46E-09 | metabolic process |
| Δc2h2 | 8-day | 2625782 | down | GO:0008152 | 5,46E-09 | metabolic process |
| Δc2h2 | 8-day | 2625836 | down | GO:0008152 | 5,46E-09 | metabolic process |
| Δc2h2 | 8-day | 2629548 | down | GO:0008152 | 5,46E-09 | metabolic process |
| Δc2h2 | 8-day | 2631112 | down | GO:0008152 | 5,46E-09 | metabolic process |
| Δc2h2 | 8-day | 2633167 | down | GO:0008152 | 5,46E-09 | metabolic process |
| Δc2h2 | 8-day | 2637708 | down | GO:0008152 | 5,46E-09 | metabolic process |
| Δc2h2 | 8-day | 2638445 | down | GO:0008152 | 5,46E-09 | metabolic process |
| Δc2h2 | 8-day | 2641553 | down | GO:0008152 | 5,46E-09 | metabolic process |
| Δc2h2 | 8-day | 2666990 | down | GO:0008152 | 5,46E-09 | metabolic process |
| Δc2h2 | 8-day | 2673857 | down | GO:0008152 | 5,46E-09 | metabolic process |
| Δc2h2 | 8-day | 2698029 | down | GO:0008152 | 5,46E-09 | metabolic process |
| Δc2h2 | 8-day | 2705669 | down | GO:0008152 | 5,46E-09 | metabolic process |
| Δc2h2 | 8-day | 15246   | down | GO:0005524 | 1,21E-07 | ATP binding       |
| Δc2h2 | 8-day | 1129062 | down | GO:0005524 | 1,21E-07 | ATP binding       |
| Δc2h2 | 8-day | 1131365 | down | GO:0005524 | 1,21E-07 | ATP binding       |
| Δc2h2 | 8-day | 1172108 | down | GO:0005524 | 1,21E-07 | ATP binding       |
| Δc2h2 | 8-day | 2253810 | down | GO:0005524 | 1,21E-07 | ATP binding       |
| Δc2h2 | 8-day | 2459580 | down | GO:0005524 | 1,21E-07 | ATP binding       |
| Δc2h2 | 8-day | 2527752 | down | GO:0005524 | 1,21E-07 | ATP binding       |
| Δc2h2 | 8-day | 2535527 | down | GO:0005524 | 1,21E-07 | ATP binding       |
| Δc2h2 | 8-day | 2610226 | down | GO:0005524 | 1,21E-07 | ATP binding       |
| Δc2h2 | 8-day | 2621253 | down | GO:0005524 | 1,21E-07 | ATP binding       |
| Δc2h2 | 8-day | 2642188 | down | GO:0005524 | 1,21E-07 | ATP binding       |

|       |       |         |      |            |          |                         |
|-------|-------|---------|------|------------|----------|-------------------------|
| Δc2h2 | 8-day | 2693043 | down | GO:0005524 | 1,21E-07 | ATP binding             |
| Δc2h2 | 8-day | 1147022 | down | GO:0003824 | 2,19E-07 | catalytic activity      |
| Δc2h2 | 8-day | 1158760 | down | GO:0003824 | 2,19E-07 | catalytic activity      |
| Δc2h2 | 8-day | 1212612 | down | GO:0003824 | 2,19E-07 | catalytic activity      |
| Δc2h2 | 8-day | 2373661 | down | GO:0003824 | 2,19E-07 | catalytic activity      |
| Δc2h2 | 8-day | 2499736 | down | GO:0003824 | 2,19E-07 | catalytic activity      |
| Δc2h2 | 8-day | 2511020 | down | GO:0003824 | 2,19E-07 | catalytic activity      |
| Δc2h2 | 8-day | 2525914 | down | GO:0003824 | 2,19E-07 | catalytic activity      |
| Δc2h2 | 8-day | 2557656 | down | GO:0003824 | 2,19E-07 | catalytic activity      |
| Δc2h2 | 8-day | 2598960 | down | GO:0003824 | 2,19E-07 | catalytic activity      |
| Δc2h2 | 8-day | 2607034 | down | GO:0003824 | 2,19E-07 | catalytic activity      |
| Δc2h2 | 8-day | 2620314 | down | GO:0003824 | 2,19E-07 | catalytic activity      |
| Δc2h2 | 8-day | 2623663 | down | GO:0003824 | 2,19E-07 | catalytic activity      |
| Δc2h2 | 8-day | 2625193 | down | GO:0003824 | 2,19E-07 | catalytic activity      |
| Δc2h2 | 8-day | 2625782 | down | GO:0003824 | 2,19E-07 | catalytic activity      |
| Δc2h2 | 8-day | 2626643 | down | GO:0003824 | 2,19E-07 | catalytic activity      |
| Δc2h2 | 8-day | 2628448 | down | GO:0003824 | 2,19E-07 | catalytic activity      |
| Δc2h2 | 8-day | 2629548 | down | GO:0003824 | 2,19E-07 | catalytic activity      |
| Δc2h2 | 8-day | 2630634 | down | GO:0003824 | 2,19E-07 | catalytic activity      |
| Δc2h2 | 8-day | 2630806 | down | GO:0003824 | 2,19E-07 | catalytic activity      |
| Δc2h2 | 8-day | 2631112 | down | GO:0003824 | 2,19E-07 | catalytic activity      |
| Δc2h2 | 8-day | 2631920 | down | GO:0003824 | 2,19E-07 | catalytic activity      |
| Δc2h2 | 8-day | 2633144 | down | GO:0003824 | 2,19E-07 | catalytic activity      |
| Δc2h2 | 8-day | 2633167 | down | GO:0003824 | 2,19E-07 | catalytic activity      |
| Δc2h2 | 8-day | 2635216 | down | GO:0003824 | 2,19E-07 | catalytic activity      |
| Δc2h2 | 8-day | 2638445 | down | GO:0003824 | 2,19E-07 | catalytic activity      |
| Δc2h2 | 8-day | 2641553 | down | GO:0003824 | 2,19E-07 | catalytic activity      |
| Δc2h2 | 8-day | 2642438 | down | GO:0003824 | 2,19E-07 | catalytic activity      |
| Δc2h2 | 8-day | 2666990 | down | GO:0003824 | 2,19E-07 | catalytic activity      |
| Δc2h2 | 8-day | 2673857 | down | GO:0003824 | 2,19E-07 | catalytic activity      |
| Δc2h2 | 8-day | 2688172 | down | GO:0003824 | 2,19E-07 | catalytic activity      |
| Δc2h2 | 8-day | 2698029 | down | GO:0003824 | 2,19E-07 | catalytic activity      |
| Δc2h2 | 8-day | 257768  | down | GO:0016491 | 1,10E-06 | oxidoreductase activity |
| Δc2h2 | 8-day | 1147022 | down | GO:0016491 | 1,10E-06 | oxidoreductase activity |



|       |       |         |      |            |             |                         |
|-------|-------|---------|------|------------|-------------|-------------------------|
| Δc2h2 | 8-day | 1156481 | down | GO:0016491 | 1,10E-06    | oxidoreductase activity |
| Δc2h2 | 8-day | 1332726 | down | GO:0016491 | 1,10E-06    | oxidoreductase activity |
| Δc2h2 | 8-day | 2213880 | down | GO:0016491 | 1,10E-06    | oxidoreductase activity |
| Δc2h2 | 8-day | 2312801 | down | GO:0016491 | 1,10E-06    | oxidoreductase activity |
| Δc2h2 | 8-day | 2499736 | down | GO:0016491 | 1,10E-06    | oxidoreductase activity |
| Δc2h2 | 8-day | 2501673 | down | GO:0016491 | 1,10E-06    | oxidoreductase activity |
| Δc2h2 | 8-day | 2503108 | down | GO:0016491 | 1,10E-06    | oxidoreductase activity |
| Δc2h2 | 8-day | 2515251 | down | GO:0016491 | 1,10E-06    | oxidoreductase activity |
| Δc2h2 | 8-day | 2515739 | down | GO:0016491 | 1,10E-06    | oxidoreductase activity |
| Δc2h2 | 8-day | 2517867 | down | GO:0016491 | 1,10E-06    | oxidoreductase activity |
| Δc2h2 | 8-day | 2573393 | down | GO:0016491 | 1,10E-06    | oxidoreductase activity |
| Δc2h2 | 8-day | 2573396 | down | GO:0016491 | 1,10E-06    | oxidoreductase activity |
| Δc2h2 | 8-day | 2603449 | down | GO:0016491 | 1,10E-06    | oxidoreductase activity |
| Δc2h2 | 8-day | 2611263 | down | GO:0016491 | 1,10E-06    | oxidoreductase activity |
| Δc2h2 | 8-day | 2615184 | down | GO:0016491 | 1,10E-06    | oxidoreductase activity |
| Δc2h2 | 8-day | 2618220 | down | GO:0016491 | 1,10E-06    | oxidoreductase activity |
| Δc2h2 | 8-day | 2620314 | down | GO:0016491 | 1,10E-06    | oxidoreductase activity |
| Δc2h2 | 8-day | 2622733 | down | GO:0016491 | 1,10E-06    | oxidoreductase activity |
| Δc2h2 | 8-day | 2623663 | down | GO:0016491 | 1,10E-06    | oxidoreductase activity |
| Δc2h2 | 8-day | 2625836 | down | GO:0016491 | 1,10E-06    | oxidoreductase activity |
| Δc2h2 | 8-day | 2630033 | down | GO:0016491 | 1,10E-06    | oxidoreductase activity |
| Δc2h2 | 8-day | 2633167 | down | GO:0016491 | 1,10E-06    | oxidoreductase activity |
| Δc2h2 | 8-day | 2638445 | down | GO:0016491 | 1,10E-06    | oxidoreductase activity |
| Δc2h2 | 8-day | 2642438 | down | GO:0016491 | 1,10E-06    | oxidoreductase activity |
| Δc2h2 | 8-day | 2688172 | down | GO:0016491 | 1,10E-06    | oxidoreductase activity |
| Δc2h2 | 8-day | 241481  | down | GO:0016301 | 0,010029993 | kinase activity         |
| Δc2h2 | 8-day | 1147022 | down | GO:0005488 | 0,011216474 | binding                 |
| Δc2h2 | 8-day | 1212612 | down | GO:0005488 | 0,011216474 | binding                 |
| Δc2h2 | 8-day | 2373661 | down | GO:0005488 | 0,011216474 | binding                 |
| Δc2h2 | 8-day | 2499736 | down | GO:0005488 | 0,011216474 | binding                 |
| Δc2h2 | 8-day | 2511020 | down | GO:0005488 | 0,011216474 | binding                 |
| Δc2h2 | 8-day | 2538820 | down | GO:0005488 | 0,011216474 | binding                 |
| Δc2h2 | 8-day | 2603669 | down | GO:0005488 | 0,011216474 | binding                 |
| Δc2h2 | 8-day | 2620649 | down | GO:0005488 | 0,011216474 | binding                 |

|       |       |         |      |            |             |                                     |
|-------|-------|---------|------|------------|-------------|-------------------------------------|
| Δc2h2 | 8-day | 2625193 | down | GO:0005488 | 0,011216474 | binding                             |
| Δc2h2 | 8-day | 2625782 | down | GO:0005488 | 0,011216474 | binding                             |
| Δc2h2 | 8-day | 2627883 | down | GO:0005488 | 0,011216474 | binding                             |
| Δc2h2 | 8-day | 2630802 | down | GO:0005488 | 0,011216474 | binding                             |
| Δc2h2 | 8-day | 2633167 | down | GO:0005488 | 0,011216474 | binding                             |
| Δc2h2 | 8-day | 2638445 | down | GO:0005488 | 0,011216474 | binding                             |
| Δc2h2 | 8-day | 2641553 | down | GO:0005488 | 0,011216474 | binding                             |
| Δc2h2 | 8-day | 2673857 | down | GO:0005488 | 0,011216474 | binding                             |
| Δc2h2 | 8-day | 2698029 | down | GO:0005488 | 0,011216474 | binding                             |
| Δc2h2 | 8-day | 2749926 | down | GO:0005488 | 0,011216474 | binding                             |
| Δc2h2 | 8-day | 1172108 | down | GO:0000166 | 0,011780559 | nucleotide binding                  |
| Δc2h2 | 8-day | 2625193 | down | GO:0050662 | 0,012318055 | coenzyme binding                    |
| Δc2h2 | 8-day | 2698029 | down | GO:0050662 | 0,012318055 | coenzyme binding                    |
| Δc2h2 | 8-day | 2566425 | down | GO:0006412 | 0,017903837 | translation                         |
| Δc2h2 | 8-day | 2621584 | down | GO:0006412 | 0,017903837 | translation                         |
| Δc2h2 | 8-day | 2640577 | down | GO:0006412 | 0,017903837 | translation                         |
| Δc2h2 | 8-day | 2560780 | down | GO:0030170 | 0,033049543 | pyridoxal phosphate binding         |
| Δc2h2 | 8-day | 2623956 | down | GO:0030170 | 0,033049543 | pyridoxal phosphate binding         |
| Δc2h2 | 8-day | 2625520 | down | GO:0030170 | 0,033049543 | pyridoxal phosphate binding         |
| Δc2h2 | 8-day | 2636719 | down | GO:0030170 | 0,033049543 | pyridoxal phosphate binding         |
| Δc2h2 | 8-day | 2625193 | down | GO:0044237 | 0,033049543 | cellular metabolic process          |
| Δc2h2 | 8-day | 2698029 | down | GO:0044237 | 0,033049543 | cellular metabolic process          |
| Δc2h2 | 8-day | 2626643 | down | GO:0000287 | 0,047718317 | magnesium ion binding               |
| Δfst3 | 8-day | 2629603 | up   | GO:0005199 | 1,34E-11    | structural constituent of cell wall |
| Δfst3 | 8-day | 2614257 | up   | GO:0005618 | 1,85E-11    | cell wall                           |
| Δfst3 | 8-day | 2629603 | up   | GO:0005618 | 1,85E-11    | cell wall                           |
| Δfst3 | 8-day | 257768  | up   | GO:0016491 | 3,82E-07    | oxidoreductase activity             |
| Δfst3 | 8-day | 2255031 | up   | GO:0016491 | 3,82E-07    | oxidoreductase activity             |
| Δfst3 | 8-day | 2333133 | up   | GO:0016491 | 3,82E-07    | oxidoreductase activity             |
| Δfst3 | 8-day | 2498556 | up   | GO:0016491 | 3,82E-07    | oxidoreductase activity             |
| Δfst3 | 8-day | 2503108 | up   | GO:0016491 | 3,82E-07    | oxidoreductase activity             |
| Δfst3 | 8-day | 2604174 | up   | GO:0016491 | 3,82E-07    | oxidoreductase activity             |
| Δfst3 | 8-day | 2608048 | up   | GO:0016491 | 3,82E-07    | oxidoreductase activity             |
| Δfst3 | 8-day | 2609840 | up   | GO:0016491 | 3,82E-07    | oxidoreductase activity             |

|       |       |         |    |            |          |                         |
|-------|-------|---------|----|------------|----------|-------------------------|
| Δfst3 | 8-day | 2617060 | up | GO:0016491 | 3,82E-07 | oxidoreductase activity |
| Δfst3 | 8-day | 2619840 | up | GO:0016491 | 3,82E-07 | oxidoreductase activity |
| Δfst3 | 8-day | 2621873 | up | GO:0016491 | 3,82E-07 | oxidoreductase activity |
| Δfst3 | 8-day | 2627335 | up | GO:0016491 | 3,82E-07 | oxidoreductase activity |
| Δfst3 | 8-day | 2634903 | up | GO:0016491 | 3,82E-07 | oxidoreductase activity |
| Δfst3 | 8-day | 2638484 | up | GO:0016491 | 3,82E-07 | oxidoreductase activity |
| Δfst3 | 8-day | 2639667 | up | GO:0016491 | 3,82E-07 | oxidoreductase activity |
| Δfst3 | 8-day | 2641506 | up | GO:0016491 | 3,82E-07 | oxidoreductase activity |
| Δfst3 | 8-day | 2641520 | up | GO:0016491 | 3,82E-07 | oxidoreductase activity |
| Δfst3 | 8-day | 2667681 | up | GO:0016491 | 3,82E-07 | oxidoreductase activity |
| Δfst3 | 8-day | 2681649 | up | GO:0016491 | 3,82E-07 | oxidoreductase activity |
| Δfst3 | 8-day | 2688172 | up | GO:0016491 | 3,82E-07 | oxidoreductase activity |
| Δfst3 | 8-day | 2248442 | up | GO:0008152 | 3,69E-06 | metabolic process       |
| Δfst3 | 8-day | 2255031 | up | GO:0008152 | 3,69E-06 | metabolic process       |
| Δfst3 | 8-day | 2333133 | up | GO:0008152 | 3,69E-06 | metabolic process       |
| Δfst3 | 8-day | 2373661 | up | GO:0008152 | 3,69E-06 | metabolic process       |
| Δfst3 | 8-day | 2492878 | up | GO:0008152 | 3,69E-06 | metabolic process       |
| Δfst3 | 8-day | 2541321 | up | GO:0008152 | 3,69E-06 | metabolic process       |
| Δfst3 | 8-day | 2577440 | up | GO:0008152 | 3,69E-06 | metabolic process       |
| Δfst3 | 8-day | 2608048 | up | GO:0008152 | 3,69E-06 | metabolic process       |
| Δfst3 | 8-day | 2611836 | up | GO:0008152 | 3,69E-06 | metabolic process       |
| Δfst3 | 8-day | 2615598 | up | GO:0008152 | 3,69E-06 | metabolic process       |
| Δfst3 | 8-day | 2619840 | up | GO:0008152 | 3,69E-06 | metabolic process       |
| Δfst3 | 8-day | 2621873 | up | GO:0008152 | 3,69E-06 | metabolic process       |
| Δfst3 | 8-day | 2625782 | up | GO:0008152 | 3,69E-06 | metabolic process       |
| Δfst3 | 8-day | 2626510 | up | GO:0008152 | 3,69E-06 | metabolic process       |
| Δfst3 | 8-day | 2627257 | up | GO:0008152 | 3,69E-06 | metabolic process       |
| Δfst3 | 8-day | 2629548 | up | GO:0008152 | 3,69E-06 | metabolic process       |
| Δfst3 | 8-day | 2632611 | up | GO:0008152 | 3,69E-06 | metabolic process       |
| Δfst3 | 8-day | 2634903 | up | GO:0008152 | 3,69E-06 | metabolic process       |
| Δfst3 | 8-day | 2637643 | up | GO:0008152 | 3,69E-06 | metabolic process       |
| Δfst3 | 8-day | 2638484 | up | GO:0008152 | 3,69E-06 | metabolic process       |
| Δfst3 | 8-day | 2640472 | up | GO:0008152 | 3,69E-06 | metabolic process       |
| Δfst3 | 8-day | 2640484 | up | GO:0008152 | 3,69E-06 | metabolic process       |

|       |       |         |    |            |             |                   |
|-------|-------|---------|----|------------|-------------|-------------------|
| Δfst3 | 8-day | 2641506 | up | GO:0008152 | 3,69E-06    | metabolic process |
| Δfst3 | 8-day | 2641520 | up | GO:0008152 | 3,69E-06    | metabolic process |
| Δfst3 | 8-day | 2643650 | up | GO:0008152 | 3,69E-06    | metabolic process |
| Δfst3 | 8-day | 2673857 | up | GO:0008152 | 3,69E-06    | metabolic process |
| Δfst3 | 8-day | 2681649 | up | GO:0008152 | 3,69E-06    | metabolic process |
| Δfst3 | 8-day | 2696676 | up | GO:0008152 | 3,69E-06    | metabolic process |
| Δfst3 | 8-day | 2699688 | up | GO:0008152 | 3,69E-06    | metabolic process |
| Δfst3 | 8-day | 2711060 | up | GO:0008152 | 3,69E-06    | metabolic process |
| Δfst3 | 8-day | 257768  | up | GO:0050660 | 4,31E-05    | FAD binding       |
| Δfst3 | 8-day | 2343034 | up | GO:0050660 | 4,31E-05    | FAD binding       |
| Δfst3 | 8-day | 2503108 | up | GO:0050660 | 4,31E-05    | FAD binding       |
| Δfst3 | 8-day | 2607677 | up | GO:0050660 | 4,31E-05    | FAD binding       |
| Δfst3 | 8-day | 2610771 | up | GO:0050660 | 4,31E-05    | FAD binding       |
| Δfst3 | 8-day | 2643012 | up | GO:0050660 | 4,31E-05    | FAD binding       |
| Δfst3 | 8-day | 2688172 | up | GO:0050660 | 4,31E-05    | FAD binding       |
| Δfst3 | 8-day | 78628   | up | GO:0020037 | 0,000782424 | heme binding      |
| Δfst3 | 8-day | 81631   | up | GO:0020037 | 0,000782424 | heme binding      |
| Δfst3 | 8-day | 1139445 | up | GO:0020037 | 0,000782424 | heme binding      |
| Δfst3 | 8-day | 1189794 | up | GO:0020037 | 0,000782424 | heme binding      |
| Δfst3 | 8-day | 2327903 | up | GO:0020037 | 0,000782424 | heme binding      |
| Δfst3 | 8-day | 2516208 | up | GO:0020037 | 0,000782424 | heme binding      |
| Δfst3 | 8-day | 2604096 | up | GO:0020037 | 0,000782424 | heme binding      |
| Δfst3 | 8-day | 2604458 | up | GO:0020037 | 0,000782424 | heme binding      |
| Δfst3 | 8-day | 2604628 | up | GO:0020037 | 0,000782424 | heme binding      |
| Δfst3 | 8-day | 2604735 | up | GO:0020037 | 0,000782424 | heme binding      |
| Δfst3 | 8-day | 2609840 | up | GO:0020037 | 0,000782424 | heme binding      |
| Δfst3 | 8-day | 2616301 | up | GO:0020037 | 0,000782424 | heme binding      |
| Δfst3 | 8-day | 2621855 | up | GO:0020037 | 0,000782424 | heme binding      |
| Δfst3 | 8-day | 2623115 | up | GO:0020037 | 0,000782424 | heme binding      |
| Δfst3 | 8-day | 2628651 | up | GO:0020037 | 0,000782424 | heme binding      |
| Δfst3 | 8-day | 2632925 | up | GO:0020037 | 0,000782424 | heme binding      |
| Δfst3 | 8-day | 2633776 | up | GO:0020037 | 0,000782424 | heme binding      |
| Δfst3 | 8-day | 2635487 | up | GO:0020037 | 0,000782424 | heme binding      |
| Δfst3 | 8-day | 2636544 | up | GO:0020037 | 0,000782424 | heme binding      |

|       |       |         |    |            |             |                                                          |
|-------|-------|---------|----|------------|-------------|----------------------------------------------------------|
| Δfst3 | 8-day | 2662483 | up | GO:0020037 | 0,000782424 | heme binding                                             |
| Δfst3 | 8-day | 2703628 | up | GO:0020037 | 0,000782424 | heme binding                                             |
| Δfst3 | 8-day | 2703966 | up | GO:0020037 | 0,000782424 | heme binding                                             |
| Δfst3 | 8-day | 2343034 | up | GO:0016614 | 0,0015783   | oxidoreductase activity, acting on CH-OH group of donors |
| Δfst3 | 8-day | 2607677 | up | GO:0016614 | 0,0015783   | oxidoreductase activity, acting on CH-OH group of donors |
| Δfst3 | 8-day | 2610771 | up | GO:0016614 | 0,0015783   | oxidoreductase activity, acting on CH-OH group of donors |
| Δfst3 | 8-day | 2643012 | up | GO:0016614 | 0,0015783   | oxidoreductase activity, acting on CH-OH group of donors |
| Δfst3 | 8-day | 78628   | up | GO:0004497 | 0,0015783   | monooxygenase activity                                   |
| Δfst3 | 8-day | 81631   | up | GO:0004497 | 0,0015783   | monooxygenase activity                                   |
| Δfst3 | 8-day | 1139445 | up | GO:0004497 | 0,0015783   | monooxygenase activity                                   |
| Δfst3 | 8-day | 1189794 | up | GO:0004497 | 0,0015783   | monooxygenase activity                                   |
| Δfst3 | 8-day | 2327903 | up | GO:0004497 | 0,0015783   | monooxygenase activity                                   |
| Δfst3 | 8-day | 2516208 | up | GO:0004497 | 0,0015783   | monooxygenase activity                                   |
| Δfst3 | 8-day | 2604096 | up | GO:0004497 | 0,0015783   | monooxygenase activity                                   |
| Δfst3 | 8-day | 2604458 | up | GO:0004497 | 0,0015783   | monooxygenase activity                                   |
| Δfst3 | 8-day | 2604735 | up | GO:0004497 | 0,0015783   | monooxygenase activity                                   |
| Δfst3 | 8-day | 2616301 | up | GO:0004497 | 0,0015783   | monooxygenase activity                                   |
| Δfst3 | 8-day | 2619840 | up | GO:0004497 | 0,0015783   | monooxygenase activity                                   |
| Δfst3 | 8-day | 2623115 | up | GO:0004497 | 0,0015783   | monooxygenase activity                                   |
| Δfst3 | 8-day | 2628651 | up | GO:0004497 | 0,0015783   | monooxygenase activity                                   |
| Δfst3 | 8-day | 2632925 | up | GO:0004497 | 0,0015783   | monooxygenase activity                                   |
| Δfst3 | 8-day | 2633776 | up | GO:0004497 | 0,0015783   | monooxygenase activity                                   |
| Δfst3 | 8-day | 2635487 | up | GO:0004497 | 0,0015783   | monooxygenase activity                                   |
| Δfst3 | 8-day | 2636544 | up | GO:0004497 | 0,0015783   | monooxygenase activity                                   |
| Δfst3 | 8-day | 2662483 | up | GO:0004497 | 0,0015783   | monooxygenase activity                                   |
| Δfst3 | 8-day | 2703628 | up | GO:0004497 | 0,0015783   | monooxygenase activity                                   |
| Δfst3 | 8-day | 2703966 | up | GO:0004497 | 0,0015783   | monooxygenase activity                                   |
| Δfst3 | 8-day | 78628   | up | GO:0006118 | 0,007592149 | electron transport                                       |
| Δfst3 | 8-day | 81631   | up | GO:0006118 | 0,007592149 | electron transport                                       |
| Δfst3 | 8-day | 257768  | up | GO:0006118 | 0,007592149 | electron transport                                       |
| Δfst3 | 8-day | 1139445 | up | GO:0006118 | 0,007592149 | electron transport                                       |
| Δfst3 | 8-day | 1189794 | up | GO:0006118 | 0,007592149 | electron transport                                       |
| Δfst3 | 8-day | 2327903 | up | GO:0006118 | 0,007592149 | electron transport                                       |
| Δfst3 | 8-day | 2498556 | up | GO:0006118 | 0,007592149 | electron transport                                       |

|       |       |         |    |            |             |                    |
|-------|-------|---------|----|------------|-------------|--------------------|
| Δfst3 | 8-day | 2503108 | up | GO:0006118 | 0,007592149 | electron transport |
| Δfst3 | 8-day | 2507628 | up | GO:0006118 | 0,007592149 | electron transport |
| Δfst3 | 8-day | 2516208 | up | GO:0006118 | 0,007592149 | electron transport |
| Δfst3 | 8-day | 2604096 | up | GO:0006118 | 0,007592149 | electron transport |
| Δfst3 | 8-day | 2604458 | up | GO:0006118 | 0,007592149 | electron transport |
| Δfst3 | 8-day | 2604628 | up | GO:0006118 | 0,007592149 | electron transport |
| Δfst3 | 8-day | 2604735 | up | GO:0006118 | 0,007592149 | electron transport |
| Δfst3 | 8-day | 2609831 | up | GO:0006118 | 0,007592149 | electron transport |
| Δfst3 | 8-day | 2609840 | up | GO:0006118 | 0,007592149 | electron transport |
| Δfst3 | 8-day | 2616301 | up | GO:0006118 | 0,007592149 | electron transport |
| Δfst3 | 8-day | 2619840 | up | GO:0006118 | 0,007592149 | electron transport |
| Δfst3 | 8-day | 2620726 | up | GO:0006118 | 0,007592149 | electron transport |
| Δfst3 | 8-day | 2621855 | up | GO:0006118 | 0,007592149 | electron transport |
| Δfst3 | 8-day | 2623115 | up | GO:0006118 | 0,007592149 | electron transport |
| Δfst3 | 8-day | 2628651 | up | GO:0006118 | 0,007592149 | electron transport |
| Δfst3 | 8-day | 2632925 | up | GO:0006118 | 0,007592149 | electron transport |
| Δfst3 | 8-day | 2633776 | up | GO:0006118 | 0,007592149 | electron transport |
| Δfst3 | 8-day | 2635487 | up | GO:0006118 | 0,007592149 | electron transport |
| Δfst3 | 8-day | 2636544 | up | GO:0006118 | 0,007592149 | electron transport |
| Δfst3 | 8-day | 2662483 | up | GO:0006118 | 0,007592149 | electron transport |
| Δfst3 | 8-day | 2703628 | up | GO:0006118 | 0,007592149 | electron transport |
| Δfst3 | 8-day | 2703966 | up | GO:0006118 | 0,007592149 | electron transport |
| Δfst3 | 8-day | 78628   | up | GO:0005506 | 0,013346341 | iron ion binding   |
| Δfst3 | 8-day | 81631   | up | GO:0005506 | 0,013346341 | iron ion binding   |
| Δfst3 | 8-day | 1139445 | up | GO:0005506 | 0,013346341 | iron ion binding   |
| Δfst3 | 8-day | 1189794 | up | GO:0005506 | 0,013346341 | iron ion binding   |
| Δfst3 | 8-day | 2327903 | up | GO:0005506 | 0,013346341 | iron ion binding   |
| Δfst3 | 8-day | 2503108 | up | GO:0005506 | 0,013346341 | iron ion binding   |
| Δfst3 | 8-day | 2516208 | up | GO:0005506 | 0,013346341 | iron ion binding   |
| Δfst3 | 8-day | 2604096 | up | GO:0005506 | 0,013346341 | iron ion binding   |
| Δfst3 | 8-day | 2604458 | up | GO:0005506 | 0,013346341 | iron ion binding   |
| Δfst3 | 8-day | 2604628 | up | GO:0005506 | 0,013346341 | iron ion binding   |
| Δfst3 | 8-day | 2604735 | up | GO:0005506 | 0,013346341 | iron ion binding   |
| Δfst3 | 8-day | 2616301 | up | GO:0005506 | 0,013346341 | iron ion binding   |

|       |       |         |      |            |             |                                 |
|-------|-------|---------|------|------------|-------------|---------------------------------|
| Δfst3 | 8-day | 2617060 | up   | GO:0005506 | 0,013346341 | iron ion binding                |
| Δfst3 | 8-day | 2621855 | up   | GO:0005506 | 0,013346341 | iron ion binding                |
| Δfst3 | 8-day | 2623115 | up   | GO:0005506 | 0,013346341 | iron ion binding                |
| Δfst3 | 8-day | 2628651 | up   | GO:0005506 | 0,013346341 | iron ion binding                |
| Δfst3 | 8-day | 2632925 | up   | GO:0005506 | 0,013346341 | iron ion binding                |
| Δfst3 | 8-day | 2633776 | up   | GO:0005506 | 0,013346341 | iron ion binding                |
| Δfst3 | 8-day | 2635487 | up   | GO:0005506 | 0,013346341 | iron ion binding                |
| Δfst3 | 8-day | 2636544 | up   | GO:0005506 | 0,013346341 | iron ion binding                |
| Δfst3 | 8-day | 2662483 | up   | GO:0005506 | 0,013346341 | iron ion binding                |
| Δfst3 | 8-day | 2703628 | up   | GO:0005506 | 0,013346341 | iron ion binding                |
| Δfst3 | 8-day | 2703966 | up   | GO:0005506 | 0,013346341 | iron ion binding                |
| Δfst3 | 8-day | 2577440 | up   | GO:0000162 | 0,02352372  | tryptophan biosynthetic process |
| Δfst3 | 8-day | 2343034 | up   | GO:0006066 | 0,024633906 | alcohol metabolic process       |
| Δfst3 | 8-day | 2607677 | up   | GO:0006066 | 0,024633906 | alcohol metabolic process       |
| Δfst3 | 8-day | 2610771 | up   | GO:0006066 | 0,024633906 | alcohol metabolic process       |
| Δfst3 | 8-day | 2643012 | up   | GO:0006066 | 0,024633906 | alcohol metabolic process       |
| Δfst3 | 8-day | 2343034 | up   | GO:0008812 | 0,024633906 | choline dehydrogenase activity  |
| Δfst3 | 8-day | 2607677 | up   | GO:0008812 | 0,024633906 | choline dehydrogenase activity  |
| Δfst3 | 8-day | 2610771 | up   | GO:0008812 | 0,024633906 | choline dehydrogenase activity  |
| Δfst3 | 8-day | 2643012 | up   | GO:0008812 | 0,024633906 | choline dehydrogenase activity  |
| Δfst3 | 8-day | 68300   | up   | GO:0005215 | 0,040947206 | transporter activity            |
| Δfst3 | 8-day | 2492878 | up   | GO:0005215 | 0,040947206 | transporter activity            |
| Δfst3 | 8-day | 2607025 | up   | GO:0005215 | 0,040947206 | transporter activity            |
| Δfst3 | 8-day | 2612313 | up   | GO:0005215 | 0,040947206 | transporter activity            |
| Δfst3 | 8-day | 2616189 | up   | GO:0005215 | 0,040947206 | transporter activity            |
| Δfst3 | 8-day | 2616961 | up   | GO:0005215 | 0,040947206 | transporter activity            |
| Δfst3 | 8-day | 2620178 | up   | GO:0005215 | 0,040947206 | transporter activity            |
| Δfst3 | 8-day | 2623043 | up   | GO:0005215 | 0,040947206 | transporter activity            |
| Δfst3 | 8-day | 2627703 | up   | GO:0005215 | 0,040947206 | transporter activity            |
| Δfst3 | 8-day | 2630802 | up   | GO:0005215 | 0,040947206 | transporter activity            |
| Δfst3 | 8-day | 2634793 | up   | GO:0005215 | 0,040947206 | transporter activity            |
| Δfst3 | 8-day | 2637509 | up   | GO:0005215 | 0,040947206 | transporter activity            |
| Δfst3 | 8-day | 2641735 | up   | GO:0005215 | 0,040947206 | transporter activity            |
| Δfst3 | 8-day | 1083109 | down | GO:0005506 | 5,74E-07    | iron ion binding                |

|       |       |         |      |            |          |                        |
|-------|-------|---------|------|------------|----------|------------------------|
| Δfst3 | 8-day | 1120318 | down | GO:0005506 | 5,74E-07 | iron ion binding       |
| Δfst3 | 8-day | 2364606 | down | GO:0005506 | 5,74E-07 | iron ion binding       |
| Δfst3 | 8-day | 2491624 | down | GO:0005506 | 5,74E-07 | iron ion binding       |
| Δfst3 | 8-day | 2501258 | down | GO:0005506 | 5,74E-07 | iron ion binding       |
| Δfst3 | 8-day | 2511002 | down | GO:0005506 | 5,74E-07 | iron ion binding       |
| Δfst3 | 8-day | 2537529 | down | GO:0005506 | 5,74E-07 | iron ion binding       |
| Δfst3 | 8-day | 2559987 | down | GO:0005506 | 5,74E-07 | iron ion binding       |
| Δfst3 | 8-day | 2618220 | down | GO:0005506 | 5,74E-07 | iron ion binding       |
| Δfst3 | 8-day | 2619716 | down | GO:0005506 | 5,74E-07 | iron ion binding       |
| Δfst3 | 8-day | 2628941 | down | GO:0005506 | 5,74E-07 | iron ion binding       |
| Δfst3 | 8-day | 2635870 | down | GO:0005506 | 5,74E-07 | iron ion binding       |
| Δfst3 | 8-day | 2703965 | down | GO:0005506 | 5,74E-07 | iron ion binding       |
| Δfst3 | 8-day | 1083109 | down | GO:0020037 | 5,50E-06 | heme binding           |
| Δfst3 | 8-day | 1120318 | down | GO:0020037 | 5,50E-06 | heme binding           |
| Δfst3 | 8-day | 2364606 | down | GO:0020037 | 5,50E-06 | heme binding           |
| Δfst3 | 8-day | 2491624 | down | GO:0020037 | 5,50E-06 | heme binding           |
| Δfst3 | 8-day | 2501258 | down | GO:0020037 | 5,50E-06 | heme binding           |
| Δfst3 | 8-day | 2511002 | down | GO:0020037 | 5,50E-06 | heme binding           |
| Δfst3 | 8-day | 2537529 | down | GO:0020037 | 5,50E-06 | heme binding           |
| Δfst3 | 8-day | 2559987 | down | GO:0020037 | 5,50E-06 | heme binding           |
| Δfst3 | 8-day | 2608091 | down | GO:0020037 | 5,50E-06 | heme binding           |
| Δfst3 | 8-day | 2619716 | down | GO:0020037 | 5,50E-06 | heme binding           |
| Δfst3 | 8-day | 2622893 | down | GO:0020037 | 5,50E-06 | heme binding           |
| Δfst3 | 8-day | 2628941 | down | GO:0020037 | 5,50E-06 | heme binding           |
| Δfst3 | 8-day | 2635870 | down | GO:0020037 | 5,50E-06 | heme binding           |
| Δfst3 | 8-day | 2640585 | down | GO:0020037 | 5,50E-06 | heme binding           |
| Δfst3 | 8-day | 2673121 | down | GO:0020037 | 5,50E-06 | heme binding           |
| Δfst3 | 8-day | 2703965 | down | GO:0020037 | 5,50E-06 | heme binding           |
| Δfst3 | 8-day | 1120318 | down | GO:0004497 | 5,50E-06 | monooxygenase activity |
| Δfst3 | 8-day | 1342670 | down | GO:0004497 | 5,50E-06 | monooxygenase activity |
| Δfst3 | 8-day | 2364606 | down | GO:0004497 | 5,50E-06 | monooxygenase activity |
| Δfst3 | 8-day | 2491624 | down | GO:0004497 | 5,50E-06 | monooxygenase activity |
| Δfst3 | 8-day | 2501258 | down | GO:0004497 | 5,50E-06 | monooxygenase activity |
| Δfst3 | 8-day | 2537529 | down | GO:0004497 | 5,50E-06 | monooxygenase activity |



|               |       |         |      |            |          |                                |
|---------------|-------|---------|------|------------|----------|--------------------------------|
| $\Delta$ fst3 | 8-day | 2559987 | down | GO:0004497 | 5,50E-06 | monooxygenase activity         |
| $\Delta$ fst3 | 8-day | 2573393 | down | GO:0004497 | 5,50E-06 | monooxygenase activity         |
| $\Delta$ fst3 | 8-day | 2573396 | down | GO:0004497 | 5,50E-06 | monooxygenase activity         |
| $\Delta$ fst3 | 8-day | 2619716 | down | GO:0004497 | 5,50E-06 | monooxygenase activity         |
| $\Delta$ fst3 | 8-day | 2628941 | down | GO:0004497 | 5,50E-06 | monooxygenase activity         |
| $\Delta$ fst3 | 8-day | 2635870 | down | GO:0004497 | 5,50E-06 | monooxygenase activity         |
| $\Delta$ fst3 | 8-day | 2703927 | down | GO:0004497 | 5,50E-06 | monooxygenase activity         |
| $\Delta$ fst3 | 8-day | 2703965 | down | GO:0004497 | 5,50E-06 | monooxygenase activity         |
| $\Delta$ fst3 | 8-day | 1120318 | down | GO:0006118 | 1,72E-05 | electron transport             |
| $\Delta$ fst3 | 8-day | 1342670 | down | GO:0006118 | 1,72E-05 | electron transport             |
| $\Delta$ fst3 | 8-day | 1356674 | down | GO:0006118 | 1,72E-05 | electron transport             |
| $\Delta$ fst3 | 8-day | 2364606 | down | GO:0006118 | 1,72E-05 | electron transport             |
| $\Delta$ fst3 | 8-day | 2491624 | down | GO:0006118 | 1,72E-05 | electron transport             |
| $\Delta$ fst3 | 8-day | 2501258 | down | GO:0006118 | 1,72E-05 | electron transport             |
| $\Delta$ fst3 | 8-day | 2508276 | down | GO:0006118 | 1,72E-05 | electron transport             |
| $\Delta$ fst3 | 8-day | 2537529 | down | GO:0006118 | 1,72E-05 | electron transport             |
| $\Delta$ fst3 | 8-day | 2559987 | down | GO:0006118 | 1,72E-05 | electron transport             |
| $\Delta$ fst3 | 8-day | 2573393 | down | GO:0006118 | 1,72E-05 | electron transport             |
| $\Delta$ fst3 | 8-day | 2573396 | down | GO:0006118 | 1,72E-05 | electron transport             |
| $\Delta$ fst3 | 8-day | 2605889 | down | GO:0006118 | 1,72E-05 | electron transport             |
| $\Delta$ fst3 | 8-day | 2619716 | down | GO:0006118 | 1,72E-05 | electron transport             |
| $\Delta$ fst3 | 8-day | 2628120 | down | GO:0006118 | 1,72E-05 | electron transport             |
| $\Delta$ fst3 | 8-day | 2628941 | down | GO:0006118 | 1,72E-05 | electron transport             |
| $\Delta$ fst3 | 8-day | 2635870 | down | GO:0006118 | 1,72E-05 | electron transport             |
| $\Delta$ fst3 | 8-day | 2638473 | down | GO:0006118 | 1,72E-05 | electron transport             |
| $\Delta$ fst3 | 8-day | 2666009 | down | GO:0006118 | 1,72E-05 | electron transport             |
| $\Delta$ fst3 | 8-day | 2703927 | down | GO:0006118 | 1,72E-05 | electron transport             |
| $\Delta$ fst3 | 8-day | 2703965 | down | GO:0006118 | 1,72E-05 | electron transport             |
| $\Delta$ fst3 | 8-day | 1087819 | down | GO:0005975 | 6,13E-05 | carbohydrate metabolic process |
| $\Delta$ fst3 | 8-day | 2514546 | down | GO:0005975 | 6,13E-05 | carbohydrate metabolic process |
| $\Delta$ fst3 | 8-day | 2605157 | down | GO:0005975 | 6,13E-05 | carbohydrate metabolic process |
| $\Delta$ fst3 | 8-day | 2612719 | down | GO:0005975 | 6,13E-05 | carbohydrate metabolic process |
| $\Delta$ fst3 | 8-day | 2613657 | down | GO:0005975 | 6,13E-05 | carbohydrate metabolic process |
| $\Delta$ fst3 | 8-day | 2636145 | down | GO:0005975 | 6,13E-05 | carbohydrate metabolic process |

|       |       |         |      |            |             |                                                      |
|-------|-------|---------|------|------------|-------------|------------------------------------------------------|
| Δfst3 | 8-day | 1120318 | down | GO:0050381 | 6,26E-05    | unspecific monooxygenase activity                    |
| Δfst3 | 8-day | 2491624 | down | GO:0050381 | 6,26E-05    | unspecific monooxygenase activity                    |
| Δfst3 | 8-day | 2559987 | down | GO:0050381 | 6,26E-05    | unspecific monooxygenase activity                    |
| Δfst3 | 8-day | 2619716 | down | GO:0050381 | 6,26E-05    | unspecific monooxygenase activity                    |
| Δfst3 | 8-day | 2703965 | down | GO:0050381 | 6,26E-05    | unspecific monooxygenase activity                    |
| Δfst3 | 8-day | 1158800 | down | GO:0005524 | 0,000119131 | ATP binding                                          |
| Δfst3 | 8-day | 1181112 | down | GO:0005524 | 0,000119131 | ATP binding                                          |
| Δfst3 | 8-day | 2486797 | down | GO:0005524 | 0,000119131 | ATP binding                                          |
| Δfst3 | 8-day | 2490823 | down | GO:0005524 | 0,000119131 | ATP binding                                          |
| Δfst3 | 8-day | 2510275 | down | GO:0005524 | 0,000119131 | ATP binding                                          |
| Δfst3 | 8-day | 2510924 | down | GO:0005524 | 0,000119131 | ATP binding                                          |
| Δfst3 | 8-day | 2511561 | down | GO:0005524 | 0,000119131 | ATP binding                                          |
| Δfst3 | 8-day | 2514780 | down | GO:0005524 | 0,000119131 | ATP binding                                          |
| Δfst3 | 8-day | 2535079 | down | GO:0005524 | 0,000119131 | ATP binding                                          |
| Δfst3 | 8-day | 2581797 | down | GO:0005524 | 0,000119131 | ATP binding                                          |
| Δfst3 | 8-day | 2631390 | down | GO:0005524 | 0,000119131 | ATP binding                                          |
| Δfst3 | 8-day | 2636368 | down | GO:0005524 | 0,000119131 | ATP binding                                          |
| Δfst3 | 8-day | 2641678 | down | GO:0005524 | 0,000119131 | ATP binding                                          |
| Δfst3 | 8-day | 2661304 | down | GO:0005524 | 0,000119131 | ATP binding                                          |
| Δfst3 | 8-day | 2675859 | down | GO:0005524 | 0,000119131 | ATP binding                                          |
| Δfst3 | 8-day | 2605157 | down | GO:0004553 | 0,000632868 | hydrolase activity, hydrolyzing O-glycosyl compounds |
| Δfst3 | 8-day | 2612719 | down | GO:0004553 | 0,000632868 | hydrolase activity, hydrolyzing O-glycosyl compounds |
| Δfst3 | 8-day | 2613657 | down | GO:0004553 | 0,000632868 | hydrolase activity, hydrolyzing O-glycosyl compounds |
| Δfst3 | 8-day | 13059   | down | GO:0006508 | 0,016298351 | proteolysis                                          |
| Δfst3 | 8-day | 2493797 | down | GO:0006508 | 0,016298351 | proteolysis                                          |
| Δfst3 | 8-day | 2494345 | down | GO:0006508 | 0,016298351 | proteolysis                                          |
| Δfst3 | 8-day | 2501086 | down | GO:0006508 | 0,016298351 | proteolysis                                          |
| Δfst3 | 8-day | 2625721 | down | GO:0006508 | 0,016298351 | proteolysis                                          |
| Δfst3 | 8-day | 2627176 | down | GO:0006508 | 0,016298351 | proteolysis                                          |
| Δfst3 | 8-day | 2639300 | down | GO:0006508 | 0,016298351 | proteolysis                                          |
| Δfst4 | 8-day | 1087819 | up   | GO:0005975 | 2,26E-05    | carbohydrate metabolic process                       |
| Δfst4 | 8-day | 1110887 | up   | GO:0005975 | 2,26E-05    | carbohydrate metabolic process                       |
| Δfst4 | 8-day | 1186967 | up   | GO:0005975 | 2,26E-05    | carbohydrate metabolic process                       |
| Δfst4 | 8-day | 2501021 | up   | GO:0005975 | 2,26E-05    | carbohydrate metabolic process                       |

|       |       |         |    |            |             |                                |
|-------|-------|---------|----|------------|-------------|--------------------------------|
| Δfst4 | 8-day | 2514546 | up | GO:0005975 | 2,26E-05    | carbohydrate metabolic process |
| Δfst4 | 8-day | 2603975 | up | GO:0005975 | 2,26E-05    | carbohydrate metabolic process |
| Δfst4 | 8-day | 2607436 | up | GO:0005975 | 2,26E-05    | carbohydrate metabolic process |
| Δfst4 | 8-day | 2620263 | up | GO:0005975 | 2,26E-05    | carbohydrate metabolic process |
| Δfst4 | 8-day | 2622489 | up | GO:0005975 | 2,26E-05    | carbohydrate metabolic process |
| Δfst4 | 8-day | 2622563 | up | GO:0005975 | 2,26E-05    | carbohydrate metabolic process |
| Δfst4 | 8-day | 2623407 | up | GO:0005975 | 2,26E-05    | carbohydrate metabolic process |
| Δfst4 | 8-day | 2626756 | up | GO:0005975 | 2,26E-05    | carbohydrate metabolic process |
| Δfst4 | 8-day | 2630789 | up | GO:0005975 | 2,26E-05    | carbohydrate metabolic process |
| Δfst4 | 8-day | 2633816 | up | GO:0005975 | 2,26E-05    | carbohydrate metabolic process |
| Δfst4 | 8-day | 2641022 | up | GO:0005975 | 2,26E-05    | carbohydrate metabolic process |
| Δfst4 | 8-day | 2645822 | up | GO:0005975 | 2,26E-05    | carbohydrate metabolic process |
| Δfst4 | 8-day | 2689018 | up | GO:0005975 | 2,26E-05    | carbohydrate metabolic process |
| Δfst4 | 8-day | 2607659 | up | GO:0008733 | 5,85E-05    | L-arabinose isomerase activity |
| Δfst4 | 8-day | 2623420 | up | GO:0008733 | 5,85E-05    | L-arabinose isomerase activity |
| Δfst4 | 8-day | 2641095 | up | GO:0008733 | 5,85E-05    | L-arabinose isomerase activity |
| Δfst4 | 8-day | 1171024 | up | GO:0005215 | 0,000120554 | transporter activity           |
| Δfst4 | 8-day | 1196424 | up | GO:0005215 | 0,000120554 | transporter activity           |
| Δfst4 | 8-day | 2358954 | up | GO:0005215 | 0,000120554 | transporter activity           |
| Δfst4 | 8-day | 2488637 | up | GO:0005215 | 0,000120554 | transporter activity           |
| Δfst4 | 8-day | 2499472 | up | GO:0005215 | 0,000120554 | transporter activity           |
| Δfst4 | 8-day | 2502284 | up | GO:0005215 | 0,000120554 | transporter activity           |
| Δfst4 | 8-day | 2508421 | up | GO:0005215 | 0,000120554 | transporter activity           |
| Δfst4 | 8-day | 2543516 | up | GO:0005215 | 0,000120554 | transporter activity           |
| Δfst4 | 8-day | 2550496 | up | GO:0005215 | 0,000120554 | transporter activity           |
| Δfst4 | 8-day | 2590808 | up | GO:0005215 | 0,000120554 | transporter activity           |
| Δfst4 | 8-day | 2607659 | up | GO:0005215 | 0,000120554 | transporter activity           |
| Δfst4 | 8-day | 2607663 | up | GO:0005215 | 0,000120554 | transporter activity           |
| Δfst4 | 8-day | 2610799 | up | GO:0005215 | 0,000120554 | transporter activity           |
| Δfst4 | 8-day | 2611460 | up | GO:0005215 | 0,000120554 | transporter activity           |
| Δfst4 | 8-day | 2611686 | up | GO:0005215 | 0,000120554 | transporter activity           |
| Δfst4 | 8-day | 2615463 | up | GO:0005215 | 0,000120554 | transporter activity           |
| Δfst4 | 8-day | 2616961 | up | GO:0005215 | 0,000120554 | transporter activity           |
| Δfst4 | 8-day | 2618842 | up | GO:0005215 | 0,000120554 | transporter activity           |

|       |       |         |    |            |             |                                                      |
|-------|-------|---------|----|------------|-------------|------------------------------------------------------|
| Δfst4 | 8-day | 2620170 | up | GO:0005215 | 0,000120554 | transporter activity                                 |
| Δfst4 | 8-day | 2622931 | up | GO:0005215 | 0,000120554 | transporter activity                                 |
| Δfst4 | 8-day | 2623420 | up | GO:0005215 | 0,000120554 | transporter activity                                 |
| Δfst4 | 8-day | 2624743 | up | GO:0005215 | 0,000120554 | transporter activity                                 |
| Δfst4 | 8-day | 2628098 | up | GO:0005215 | 0,000120554 | transporter activity                                 |
| Δfst4 | 8-day | 2628751 | up | GO:0005215 | 0,000120554 | transporter activity                                 |
| Δfst4 | 8-day | 2628982 | up | GO:0005215 | 0,000120554 | transporter activity                                 |
| Δfst4 | 8-day | 2631348 | up | GO:0005215 | 0,000120554 | transporter activity                                 |
| Δfst4 | 8-day | 2632105 | up | GO:0005215 | 0,000120554 | transporter activity                                 |
| Δfst4 | 8-day | 2633354 | up | GO:0005215 | 0,000120554 | transporter activity                                 |
| Δfst4 | 8-day | 2633596 | up | GO:0005215 | 0,000120554 | transporter activity                                 |
| Δfst4 | 8-day | 2637509 | up | GO:0005215 | 0,000120554 | transporter activity                                 |
| Δfst4 | 8-day | 2637652 | up | GO:0005215 | 0,000120554 | transporter activity                                 |
| Δfst4 | 8-day | 2641095 | up | GO:0005215 | 0,000120554 | transporter activity                                 |
| Δfst4 | 8-day | 2641989 | up | GO:0005215 | 0,000120554 | transporter activity                                 |
| Δfst4 | 8-day | 2644053 | up | GO:0005215 | 0,000120554 | transporter activity                                 |
| Δfst4 | 8-day | 2607659 | up | GO:0005351 | 0,000120554 | sugar:hydrogen symporter activity                    |
| Δfst4 | 8-day | 2610180 | up | GO:0005351 | 0,000120554 | sugar:hydrogen symporter activity                    |
| Δfst4 | 8-day | 2623420 | up | GO:0005351 | 0,000120554 | sugar:hydrogen symporter activity                    |
| Δfst4 | 8-day | 2641095 | up | GO:0005351 | 0,000120554 | sugar:hydrogen symporter activity                    |
| Δfst4 | 8-day | 2607659 | up | GO:0008643 | 0,000120554 | carbohydrate transport                               |
| Δfst4 | 8-day | 2623420 | up | GO:0008643 | 0,000120554 | carbohydrate transport                               |
| Δfst4 | 8-day | 2641095 | up | GO:0008643 | 0,000120554 | carbohydrate transport                               |
| Δfst4 | 8-day | 1110887 | up | GO:0004553 | 0,000124742 | hydrolase activity, hydrolyzing O-glycosyl compounds |
| Δfst4 | 8-day | 2603975 | up | GO:0004553 | 0,000124742 | hydrolase activity, hydrolyzing O-glycosyl compounds |
| Δfst4 | 8-day | 2622489 | up | GO:0004553 | 0,000124742 | hydrolase activity, hydrolyzing O-glycosyl compounds |
| Δfst4 | 8-day | 2622563 | up | GO:0004553 | 0,000124742 | hydrolase activity, hydrolyzing O-glycosyl compounds |
| Δfst4 | 8-day | 2623407 | up | GO:0004553 | 0,000124742 | hydrolase activity, hydrolyzing O-glycosyl compounds |
| Δfst4 | 8-day | 2630789 | up | GO:0004553 | 0,000124742 | hydrolase activity, hydrolyzing O-glycosyl compounds |
| Δfst4 | 8-day | 2633816 | up | GO:0004553 | 0,000124742 | hydrolase activity, hydrolyzing O-glycosyl compounds |
| Δfst4 | 8-day | 2645822 | up | GO:0004553 | 0,000124742 | hydrolase activity, hydrolyzing O-glycosyl compounds |
| Δfst4 | 8-day | 2689018 | up | GO:0004553 | 0,000124742 | hydrolase activity, hydrolyzing O-glycosyl compounds |
| Δfst4 | 8-day | 1171024 | up | GO:0006810 | 0,000156836 | transport                                            |
| Δfst4 | 8-day | 1193256 | up | GO:0006810 | 0,000156836 | transport                                            |

|       |       |         |    |            |             |           |
|-------|-------|---------|----|------------|-------------|-----------|
| Δfst4 | 8-day | 1196424 | up | GO:0006810 | 0,000156836 | transport |
| Δfst4 | 8-day | 2279823 | up | GO:0006810 | 0,000156836 | transport |
| Δfst4 | 8-day | 2484205 | up | GO:0006810 | 0,000156836 | transport |
| Δfst4 | 8-day | 2488637 | up | GO:0006810 | 0,000156836 | transport |
| Δfst4 | 8-day | 2499472 | up | GO:0006810 | 0,000156836 | transport |
| Δfst4 | 8-day | 2499519 | up | GO:0006810 | 0,000156836 | transport |
| Δfst4 | 8-day | 2502058 | up | GO:0006810 | 0,000156836 | transport |
| Δfst4 | 8-day | 2502284 | up | GO:0006810 | 0,000156836 | transport |
| Δfst4 | 8-day | 2508421 | up | GO:0006810 | 0,000156836 | transport |
| Δfst4 | 8-day | 2517716 | up | GO:0006810 | 0,000156836 | transport |
| Δfst4 | 8-day | 2543516 | up | GO:0006810 | 0,000156836 | transport |
| Δfst4 | 8-day | 2550496 | up | GO:0006810 | 0,000156836 | transport |
| Δfst4 | 8-day | 2569288 | up | GO:0006810 | 0,000156836 | transport |
| Δfst4 | 8-day | 2590808 | up | GO:0006810 | 0,000156836 | transport |
| Δfst4 | 8-day | 2605313 | up | GO:0006810 | 0,000156836 | transport |
| Δfst4 | 8-day | 2607659 | up | GO:0006810 | 0,000156836 | transport |
| Δfst4 | 8-day | 2607663 | up | GO:0006810 | 0,000156836 | transport |
| Δfst4 | 8-day | 2610799 | up | GO:0006810 | 0,000156836 | transport |
| Δfst4 | 8-day | 2611460 | up | GO:0006810 | 0,000156836 | transport |
| Δfst4 | 8-day | 2611686 | up | GO:0006810 | 0,000156836 | transport |
| Δfst4 | 8-day | 2615463 | up | GO:0006810 | 0,000156836 | transport |
| Δfst4 | 8-day | 2616961 | up | GO:0006810 | 0,000156836 | transport |
| Δfst4 | 8-day | 2618842 | up | GO:0006810 | 0,000156836 | transport |
| Δfst4 | 8-day | 2620170 | up | GO:0006810 | 0,000156836 | transport |
| Δfst4 | 8-day | 2620257 | up | GO:0006810 | 0,000156836 | transport |
| Δfst4 | 8-day | 2622931 | up | GO:0006810 | 0,000156836 | transport |
| Δfst4 | 8-day | 2623420 | up | GO:0006810 | 0,000156836 | transport |
| Δfst4 | 8-day | 2623894 | up | GO:0006810 | 0,000156836 | transport |
| Δfst4 | 8-day | 2624743 | up | GO:0006810 | 0,000156836 | transport |
| Δfst4 | 8-day | 2628098 | up | GO:0006810 | 0,000156836 | transport |
| Δfst4 | 8-day | 2628751 | up | GO:0006810 | 0,000156836 | transport |
| Δfst4 | 8-day | 2628982 | up | GO:0006810 | 0,000156836 | transport |
| Δfst4 | 8-day | 2629191 | up | GO:0006810 | 0,000156836 | transport |
| Δfst4 | 8-day | 2631348 | up | GO:0006810 | 0,000156836 | transport |

|       |       |         |    |            |             |                      |
|-------|-------|---------|----|------------|-------------|----------------------|
| Δfst4 | 8-day | 2632105 | up | GO:0006810 | 0,000156836 | transport            |
| Δfst4 | 8-day | 2633354 | up | GO:0006810 | 0,000156836 | transport            |
| Δfst4 | 8-day | 2633596 | up | GO:0006810 | 0,000156836 | transport            |
| Δfst4 | 8-day | 2637509 | up | GO:0006810 | 0,000156836 | transport            |
| Δfst4 | 8-day | 2637652 | up | GO:0006810 | 0,000156836 | transport            |
| Δfst4 | 8-day | 2638969 | up | GO:0006810 | 0,000156836 | transport            |
| Δfst4 | 8-day | 2641095 | up | GO:0006810 | 0,000156836 | transport            |
| Δfst4 | 8-day | 2641989 | up | GO:0006810 | 0,000156836 | transport            |
| Δfst4 | 8-day | 2642427 | up | GO:0006810 | 0,000156836 | transport            |
| Δfst4 | 8-day | 2643281 | up | GO:0006810 | 0,000156836 | transport            |
| Δfst4 | 8-day | 2644053 | up | GO:0006810 | 0,000156836 | transport            |
| Δfst4 | 8-day | 2675831 | up | GO:0006810 | 0,000156836 | transport            |
| Δfst4 | 8-day | 2675859 | up | GO:0006810 | 0,000156836 | transport            |
| Δfst4 | 8-day | 2676409 | up | GO:0006810 | 0,000156836 | transport            |
| Δfst4 | 8-day | 1034973 | up | GO:0016021 | 0,000235898 | integral to membrane |
| Δfst4 | 8-day | 1171024 | up | GO:0016021 | 0,000235898 | integral to membrane |
| Δfst4 | 8-day | 1193256 | up | GO:0016021 | 0,000235898 | integral to membrane |
| Δfst4 | 8-day | 2279823 | up | GO:0016021 | 0,000235898 | integral to membrane |
| Δfst4 | 8-day | 2484205 | up | GO:0016021 | 0,000235898 | integral to membrane |
| Δfst4 | 8-day | 2488637 | up | GO:0016021 | 0,000235898 | integral to membrane |
| Δfst4 | 8-day | 2499472 | up | GO:0016021 | 0,000235898 | integral to membrane |
| Δfst4 | 8-day | 2500392 | up | GO:0016021 | 0,000235898 | integral to membrane |
| Δfst4 | 8-day | 2507178 | up | GO:0016021 | 0,000235898 | integral to membrane |
| Δfst4 | 8-day | 2508421 | up | GO:0016021 | 0,000235898 | integral to membrane |
| Δfst4 | 8-day | 2517716 | up | GO:0016021 | 0,000235898 | integral to membrane |
| Δfst4 | 8-day | 2543516 | up | GO:0016021 | 0,000235898 | integral to membrane |
| Δfst4 | 8-day | 2549530 | up | GO:0016021 | 0,000235898 | integral to membrane |
| Δfst4 | 8-day | 2603898 | up | GO:0016021 | 0,000235898 | integral to membrane |
| Δfst4 | 8-day | 2604210 | up | GO:0016021 | 0,000235898 | integral to membrane |
| Δfst4 | 8-day | 2607659 | up | GO:0016021 | 0,000235898 | integral to membrane |
| Δfst4 | 8-day | 2607663 | up | GO:0016021 | 0,000235898 | integral to membrane |
| Δfst4 | 8-day | 2611686 | up | GO:0016021 | 0,000235898 | integral to membrane |
| Δfst4 | 8-day | 2616961 | up | GO:0016021 | 0,000235898 | integral to membrane |
| Δfst4 | 8-day | 2618842 | up | GO:0016021 | 0,000235898 | integral to membrane |

|       |       |         |    |            |             |                           |
|-------|-------|---------|----|------------|-------------|---------------------------|
| Δfst4 | 8-day | 2619090 | up | GO:0016021 | 0,000235898 | integral to membrane      |
| Δfst4 | 8-day | 2620170 | up | GO:0016021 | 0,000235898 | integral to membrane      |
| Δfst4 | 8-day | 2622931 | up | GO:0016021 | 0,000235898 | integral to membrane      |
| Δfst4 | 8-day | 2623420 | up | GO:0016021 | 0,000235898 | integral to membrane      |
| Δfst4 | 8-day | 2624743 | up | GO:0016021 | 0,000235898 | integral to membrane      |
| Δfst4 | 8-day | 2626626 | up | GO:0016021 | 0,000235898 | integral to membrane      |
| Δfst4 | 8-day | 2628982 | up | GO:0016021 | 0,000235898 | integral to membrane      |
| Δfst4 | 8-day | 2631348 | up | GO:0016021 | 0,000235898 | integral to membrane      |
| Δfst4 | 8-day | 2632105 | up | GO:0016021 | 0,000235898 | integral to membrane      |
| Δfst4 | 8-day | 2637509 | up | GO:0016021 | 0,000235898 | integral to membrane      |
| Δfst4 | 8-day | 2637652 | up | GO:0016021 | 0,000235898 | integral to membrane      |
| Δfst4 | 8-day | 2638177 | up | GO:0016021 | 0,000235898 | integral to membrane      |
| Δfst4 | 8-day | 2638969 | up | GO:0016021 | 0,000235898 | integral to membrane      |
| Δfst4 | 8-day | 2641095 | up | GO:0016021 | 0,000235898 | integral to membrane      |
| Δfst4 | 8-day | 2641989 | up | GO:0016021 | 0,000235898 | integral to membrane      |
| Δfst4 | 8-day | 2642427 | up | GO:0016021 | 0,000235898 | integral to membrane      |
| Δfst4 | 8-day | 2644053 | up | GO:0016021 | 0,000235898 | integral to membrane      |
| Δfst4 | 8-day | 2675859 | up | GO:0016021 | 0,000235898 | integral to membrane      |
| Δfst4 | 8-day | 2676409 | up | GO:0016021 | 0,000235898 | integral to membrane      |
| Δfst4 | 8-day | 2704852 | up | GO:0016021 | 0,000235898 | integral to membrane      |
| Δfst4 | 8-day | 2638921 | up | GO:0004091 | 0,011782709 | carboxylesterase activity |
| Δfst4 | 8-day | 17460   | up | GO:0005524 | 0,029754011 | ATP binding               |
| Δfst4 | 8-day | 68280   | up | GO:0005524 | 0,029754011 | ATP binding               |
| Δfst4 | 8-day | 83108   | up | GO:0005524 | 0,029754011 | ATP binding               |
| Δfst4 | 8-day | 1141641 | up | GO:0005524 | 0,029754011 | ATP binding               |
| Δfst4 | 8-day | 1157948 | up | GO:0005524 | 0,029754011 | ATP binding               |
| Δfst4 | 8-day | 1165803 | up | GO:0005524 | 0,029754011 | ATP binding               |
| Δfst4 | 8-day | 1166149 | up | GO:0005524 | 0,029754011 | ATP binding               |
| Δfst4 | 8-day | 1193256 | up | GO:0005524 | 0,029754011 | ATP binding               |
| Δfst4 | 8-day | 1196424 | up | GO:0005524 | 0,029754011 | ATP binding               |
| Δfst4 | 8-day | 2007168 | up | GO:0005524 | 0,029754011 | ATP binding               |
| Δfst4 | 8-day | 2018969 | up | GO:0005524 | 0,029754011 | ATP binding               |
| Δfst4 | 8-day | 2187522 | up | GO:0005524 | 0,029754011 | ATP binding               |
| Δfst4 | 8-day | 2276863 | up | GO:0005524 | 0,029754011 | ATP binding               |

|       |       |         |    |            |             |             |
|-------|-------|---------|----|------------|-------------|-------------|
| Δfst4 | 8-day | 2279823 | up | GO:0005524 | 0,029754011 | ATP binding |
| Δfst4 | 8-day | 2481145 | up | GO:0005524 | 0,029754011 | ATP binding |
| Δfst4 | 8-day | 2481375 | up | GO:0005524 | 0,029754011 | ATP binding |
| Δfst4 | 8-day | 2484205 | up | GO:0005524 | 0,029754011 | ATP binding |
| Δfst4 | 8-day | 2484841 | up | GO:0005524 | 0,029754011 | ATP binding |
| Δfst4 | 8-day | 2485507 | up | GO:0005524 | 0,029754011 | ATP binding |
| Δfst4 | 8-day | 2485669 | up | GO:0005524 | 0,029754011 | ATP binding |
| Δfst4 | 8-day | 2486219 | up | GO:0005524 | 0,029754011 | ATP binding |
| Δfst4 | 8-day | 2486797 | up | GO:0005524 | 0,029754011 | ATP binding |
| Δfst4 | 8-day | 2489133 | up | GO:0005524 | 0,029754011 | ATP binding |
| Δfst4 | 8-day | 2490024 | up | GO:0005524 | 0,029754011 | ATP binding |
| Δfst4 | 8-day | 2491745 | up | GO:0005524 | 0,029754011 | ATP binding |
| Δfst4 | 8-day | 2495301 | up | GO:0005524 | 0,029754011 | ATP binding |
| Δfst4 | 8-day | 2501434 | up | GO:0005524 | 0,029754011 | ATP binding |
| Δfst4 | 8-day | 2501652 | up | GO:0005524 | 0,029754011 | ATP binding |
| Δfst4 | 8-day | 2502058 | up | GO:0005524 | 0,029754011 | ATP binding |
| Δfst4 | 8-day | 2505052 | up | GO:0005524 | 0,029754011 | ATP binding |
| Δfst4 | 8-day | 2510275 | up | GO:0005524 | 0,029754011 | ATP binding |
| Δfst4 | 8-day | 2511765 | up | GO:0005524 | 0,029754011 | ATP binding |
| Δfst4 | 8-day | 2514250 | up | GO:0005524 | 0,029754011 | ATP binding |
| Δfst4 | 8-day | 2514780 | up | GO:0005524 | 0,029754011 | ATP binding |
| Δfst4 | 8-day | 2517716 | up | GO:0005524 | 0,029754011 | ATP binding |
| Δfst4 | 8-day | 2519304 | up | GO:0005524 | 0,029754011 | ATP binding |
| Δfst4 | 8-day | 2520682 | up | GO:0005524 | 0,029754011 | ATP binding |
| Δfst4 | 8-day | 2530387 | up | GO:0005524 | 0,029754011 | ATP binding |
| Δfst4 | 8-day | 2536562 | up | GO:0005524 | 0,029754011 | ATP binding |
| Δfst4 | 8-day | 2540501 | up | GO:0005524 | 0,029754011 | ATP binding |
| Δfst4 | 8-day | 2550266 | up | GO:0005524 | 0,029754011 | ATP binding |
| Δfst4 | 8-day | 2553325 | up | GO:0005524 | 0,029754011 | ATP binding |
| Δfst4 | 8-day | 2557283 | up | GO:0005524 | 0,029754011 | ATP binding |
| Δfst4 | 8-day | 2564434 | up | GO:0005524 | 0,029754011 | ATP binding |
| Δfst4 | 8-day | 2568673 | up | GO:0005524 | 0,029754011 | ATP binding |
| Δfst4 | 8-day | 2572775 | up | GO:0005524 | 0,029754011 | ATP binding |
| Δfst4 | 8-day | 2574746 | up | GO:0005524 | 0,029754011 | ATP binding |



|       |       |         |    |            |             |             |
|-------|-------|---------|----|------------|-------------|-------------|
| Δfst4 | 8-day | 2583917 | up | GO:0005524 | 0,029754011 | ATP binding |
| Δfst4 | 8-day | 2585476 | up | GO:0005524 | 0,029754011 | ATP binding |
| Δfst4 | 8-day | 2601119 | up | GO:0005524 | 0,029754011 | ATP binding |
| Δfst4 | 8-day | 2604428 | up | GO:0005524 | 0,029754011 | ATP binding |
| Δfst4 | 8-day | 2604805 | up | GO:0005524 | 0,029754011 | ATP binding |
| Δfst4 | 8-day | 2604894 | up | GO:0005524 | 0,029754011 | ATP binding |
| Δfst4 | 8-day | 2605230 | up | GO:0005524 | 0,029754011 | ATP binding |
| Δfst4 | 8-day | 2605455 | up | GO:0005524 | 0,029754011 | ATP binding |
| Δfst4 | 8-day | 2606752 | up | GO:0005524 | 0,029754011 | ATP binding |
| Δfst4 | 8-day | 2609653 | up | GO:0005524 | 0,029754011 | ATP binding |
| Δfst4 | 8-day | 2610180 | up | GO:0005524 | 0,029754011 | ATP binding |
| Δfst4 | 8-day | 2610629 | up | GO:0005524 | 0,029754011 | ATP binding |
| Δfst4 | 8-day | 2611700 | up | GO:0005524 | 0,029754011 | ATP binding |
| Δfst4 | 8-day | 2612206 | up | GO:0005524 | 0,029754011 | ATP binding |
| Δfst4 | 8-day | 2612608 | up | GO:0005524 | 0,029754011 | ATP binding |
| Δfst4 | 8-day | 2614761 | up | GO:0005524 | 0,029754011 | ATP binding |
| Δfst4 | 8-day | 2614894 | up | GO:0005524 | 0,029754011 | ATP binding |
| Δfst4 | 8-day | 2615290 | up | GO:0005524 | 0,029754011 | ATP binding |
| Δfst4 | 8-day | 2616310 | up | GO:0005524 | 0,029754011 | ATP binding |
| Δfst4 | 8-day | 2616339 | up | GO:0005524 | 0,029754011 | ATP binding |
| Δfst4 | 8-day | 2616964 | up | GO:0005524 | 0,029754011 | ATP binding |
| Δfst4 | 8-day | 2618594 | up | GO:0005524 | 0,029754011 | ATP binding |
| Δfst4 | 8-day | 2618956 | up | GO:0005524 | 0,029754011 | ATP binding |
| Δfst4 | 8-day | 2619461 | up | GO:0005524 | 0,029754011 | ATP binding |
| Δfst4 | 8-day | 2620364 | up | GO:0005524 | 0,029754011 | ATP binding |
| Δfst4 | 8-day | 2620969 | up | GO:0005524 | 0,029754011 | ATP binding |
| Δfst4 | 8-day | 2621741 | up | GO:0005524 | 0,029754011 | ATP binding |
| Δfst4 | 8-day | 2621763 | up | GO:0005524 | 0,029754011 | ATP binding |
| Δfst4 | 8-day | 2624145 | up | GO:0005524 | 0,029754011 | ATP binding |
| Δfst4 | 8-day | 2624360 | up | GO:0005524 | 0,029754011 | ATP binding |
| Δfst4 | 8-day | 2626895 | up | GO:0005524 | 0,029754011 | ATP binding |
| Δfst4 | 8-day | 2627081 | up | GO:0005524 | 0,029754011 | ATP binding |
| Δfst4 | 8-day | 2627181 | up | GO:0005524 | 0,029754011 | ATP binding |
| Δfst4 | 8-day | 2630261 | up | GO:0005524 | 0,029754011 | ATP binding |

|       |       |         |    |            |             |                  |
|-------|-------|---------|----|------------|-------------|------------------|
| Δfst4 | 8-day | 2631055 | up | GO:0005524 | 0,029754011 | ATP binding      |
| Δfst4 | 8-day | 2631390 | up | GO:0005524 | 0,029754011 | ATP binding      |
| Δfst4 | 8-day | 2632216 | up | GO:0005524 | 0,029754011 | ATP binding      |
| Δfst4 | 8-day | 2632420 | up | GO:0005524 | 0,029754011 | ATP binding      |
| Δfst4 | 8-day | 2633620 | up | GO:0005524 | 0,029754011 | ATP binding      |
| Δfst4 | 8-day | 2633672 | up | GO:0005524 | 0,029754011 | ATP binding      |
| Δfst4 | 8-day | 2633881 | up | GO:0005524 | 0,029754011 | ATP binding      |
| Δfst4 | 8-day | 2634258 | up | GO:0005524 | 0,029754011 | ATP binding      |
| Δfst4 | 8-day | 2634784 | up | GO:0005524 | 0,029754011 | ATP binding      |
| Δfst4 | 8-day | 2636406 | up | GO:0005524 | 0,029754011 | ATP binding      |
| Δfst4 | 8-day | 2638762 | up | GO:0005524 | 0,029754011 | ATP binding      |
| Δfst4 | 8-day | 2638986 | up | GO:0005524 | 0,029754011 | ATP binding      |
| Δfst4 | 8-day | 2642427 | up | GO:0005524 | 0,029754011 | ATP binding      |
| Δfst4 | 8-day | 2643236 | up | GO:0005524 | 0,029754011 | ATP binding      |
| Δfst4 | 8-day | 2645192 | up | GO:0005524 | 0,029754011 | ATP binding      |
| Δfst4 | 8-day | 2645217 | up | GO:0005524 | 0,029754011 | ATP binding      |
| Δfst4 | 8-day | 2662599 | up | GO:0005524 | 0,029754011 | ATP binding      |
| Δfst4 | 8-day | 2671089 | up | GO:0005524 | 0,029754011 | ATP binding      |
| Δfst4 | 8-day | 2672807 | up | GO:0005524 | 0,029754011 | ATP binding      |
| Δfst4 | 8-day | 2674869 | up | GO:0005524 | 0,029754011 | ATP binding      |
| Δfst4 | 8-day | 2675859 | up | GO:0005524 | 0,029754011 | ATP binding      |
| Δfst4 | 8-day | 2676409 | up | GO:0005524 | 0,029754011 | ATP binding      |
| Δfst4 | 8-day | 2681506 | up | GO:0005524 | 0,029754011 | ATP binding      |
| Δfst4 | 8-day | 2689581 | up | GO:0005524 | 0,029754011 | ATP binding      |
| Δfst4 | 8-day | 2691288 | up | GO:0005524 | 0,029754011 | ATP binding      |
| Δfst4 | 8-day | 2706463 | up | GO:0005524 | 0,029754011 | ATP binding      |
| Δfst4 | 8-day | 2745977 | up | GO:0005524 | 0,029754011 | ATP binding      |
| Δfst4 | 8-day | 2750974 | up | GO:0005524 | 0,029754011 | ATP binding      |
| Δfst4 | 8-day | 2753335 | up | GO:0005524 | 0,029754011 | ATP binding      |
| Δfst4 | 8-day | 1120318 | up | GO:0005506 | 0,044746953 | iron ion binding |
| Δfst4 | 8-day | 1193647 | up | GO:0005506 | 0,044746953 | iron ion binding |
| Δfst4 | 8-day | 2376858 | up | GO:0005506 | 0,044746953 | iron ion binding |
| Δfst4 | 8-day | 2487208 | up | GO:0005506 | 0,044746953 | iron ion binding |
| Δfst4 | 8-day | 2493935 | up | GO:0005506 | 0,044746953 | iron ion binding |

|       |       |         |      |            |             |                  |
|-------|-------|---------|------|------------|-------------|------------------|
| Δfst4 | 8-day | 2497674 | up   | GO:0005506 | 0,044746953 | iron ion binding |
| Δfst4 | 8-day | 2501258 | up   | GO:0005506 | 0,044746953 | iron ion binding |
| Δfst4 | 8-day | 2517480 | up   | GO:0005506 | 0,044746953 | iron ion binding |
| Δfst4 | 8-day | 2604096 | up   | GO:0005506 | 0,044746953 | iron ion binding |
| Δfst4 | 8-day | 2604458 | up   | GO:0005506 | 0,044746953 | iron ion binding |
| Δfst4 | 8-day | 2609502 | up   | GO:0005506 | 0,044746953 | iron ion binding |
| Δfst4 | 8-day | 2618018 | up   | GO:0005506 | 0,044746953 | iron ion binding |
| Δfst4 | 8-day | 2620407 | up   | GO:0005506 | 0,044746953 | iron ion binding |
| Δfst4 | 8-day | 2623115 | up   | GO:0005506 | 0,044746953 | iron ion binding |
| Δfst4 | 8-day | 2623122 | up   | GO:0005506 | 0,044746953 | iron ion binding |
| Δfst4 | 8-day | 2623189 | up   | GO:0005506 | 0,044746953 | iron ion binding |
| Δfst4 | 8-day | 2623701 | up   | GO:0005506 | 0,044746953 | iron ion binding |
| Δfst4 | 8-day | 2624973 | up   | GO:0005506 | 0,044746953 | iron ion binding |
| Δfst4 | 8-day | 2626362 | up   | GO:0005506 | 0,044746953 | iron ion binding |
| Δfst4 | 8-day | 2627525 | up   | GO:0005506 | 0,044746953 | iron ion binding |
| Δfst4 | 8-day | 2633776 | up   | GO:0005506 | 0,044746953 | iron ion binding |
| Δfst4 | 8-day | 2635869 | up   | GO:0005506 | 0,044746953 | iron ion binding |
| Δfst4 | 8-day | 2635870 | up   | GO:0005506 | 0,044746953 | iron ion binding |
| Δfst4 | 8-day | 2636160 | up   | GO:0005506 | 0,044746953 | iron ion binding |
| Δfst4 | 8-day | 2644002 | up   | GO:0005506 | 0,044746953 | iron ion binding |
| Δfst4 | 8-day | 2666440 | up   | GO:0005506 | 0,044746953 | iron ion binding |
| Δfst4 | 8-day | 2732977 | up   | GO:0005506 | 0,044746953 | iron ion binding |
| Δfst4 | 8-day | 15246   | down | GO:0005524 | 2,67E-12    | ATP binding      |
| Δfst4 | 8-day | 63296   | down | GO:0005524 | 2,67E-12    | ATP binding      |
| Δfst4 | 8-day | 1127007 | down | GO:0005524 | 2,67E-12    | ATP binding      |
| Δfst4 | 8-day | 1131365 | down | GO:0005524 | 2,67E-12    | ATP binding      |
| Δfst4 | 8-day | 2206419 | down | GO:0005524 | 2,67E-12    | ATP binding      |
| Δfst4 | 8-day | 2212909 | down | GO:0005524 | 2,67E-12    | ATP binding      |
| Δfst4 | 8-day | 2483083 | down | GO:0005524 | 2,67E-12    | ATP binding      |
| Δfst4 | 8-day | 2493870 | down | GO:0005524 | 2,67E-12    | ATP binding      |
| Δfst4 | 8-day | 2504654 | down | GO:0005524 | 2,67E-12    | ATP binding      |
| Δfst4 | 8-day | 2512873 | down | GO:0005524 | 2,67E-12    | ATP binding      |
| Δfst4 | 8-day | 2535618 | down | GO:0005524 | 2,67E-12    | ATP binding      |
| Δfst4 | 8-day | 2553433 | down | GO:0005524 | 2,67E-12    | ATP binding      |

|       |       |         |      |            |          |             |
|-------|-------|---------|------|------------|----------|-------------|
| Δfst4 | 8-day | 2563594 | down | GO:0005524 | 2,67E-12 | ATP binding |
| Δfst4 | 8-day | 2565471 | down | GO:0005524 | 2,67E-12 | ATP binding |
| Δfst4 | 8-day | 2610226 | down | GO:0005524 | 2,67E-12 | ATP binding |
| Δfst4 | 8-day | 2616602 | down | GO:0005524 | 2,67E-12 | ATP binding |
| Δfst4 | 8-day | 2621253 | down | GO:0005524 | 2,67E-12 | ATP binding |
| Δfst4 | 8-day | 2622087 | down | GO:0005524 | 2,67E-12 | ATP binding |
| Δfst4 | 8-day | 2625496 | down | GO:0005524 | 2,67E-12 | ATP binding |
| Δfst4 | 8-day | 2629497 | down | GO:0005524 | 2,67E-12 | ATP binding |
| Δfst4 | 8-day | 2633314 | down | GO:0005524 | 2,67E-12 | ATP binding |
| Δfst4 | 8-day | 2636918 | down | GO:0005524 | 2,67E-12 | ATP binding |
| Δfst4 | 8-day | 2642188 | down | GO:0005524 | 2,67E-12 | ATP binding |
| Δfst4 | 8-day | 2661112 | down | GO:0005524 | 2,67E-12 | ATP binding |
| Δfst4 | 8-day | 2684679 | down | GO:0005524 | 2,67E-12 | ATP binding |
| Δfst4 | 8-day | 2690708 | down | GO:0005524 | 2,67E-12 | ATP binding |
| Δfst4 | 8-day | 2695021 | down | GO:0005524 | 2,67E-12 | ATP binding |
| Δfst4 | 8-day | 2748506 | down | GO:0005524 | 2,67E-12 | ATP binding |
| Δfst4 | 8-day | 1120237 | down | GO:0003677 | 1,94E-08 | DNA binding |
| Δfst4 | 8-day | 1136828 | down | GO:0003677 | 1,94E-08 | DNA binding |
| Δfst4 | 8-day | 1192535 | down | GO:0003677 | 1,94E-08 | DNA binding |
| Δfst4 | 8-day | 2467966 | down | GO:0003677 | 1,94E-08 | DNA binding |
| Δfst4 | 8-day | 2510481 | down | GO:0003677 | 1,94E-08 | DNA binding |
| Δfst4 | 8-day | 2596857 | down | GO:0003677 | 1,94E-08 | DNA binding |
| Δfst4 | 8-day | 2605931 | down | GO:0003677 | 1,94E-08 | DNA binding |
| Δfst4 | 8-day | 2607126 | down | GO:0003677 | 1,94E-08 | DNA binding |
| Δfst4 | 8-day | 2608348 | down | GO:0003677 | 1,94E-08 | DNA binding |
| Δfst4 | 8-day | 2609231 | down | GO:0003677 | 1,94E-08 | DNA binding |
| Δfst4 | 8-day | 2615561 | down | GO:0003677 | 1,94E-08 | DNA binding |
| Δfst4 | 8-day | 2620175 | down | GO:0003677 | 1,94E-08 | DNA binding |
| Δfst4 | 8-day | 2622267 | down | GO:0003677 | 1,94E-08 | DNA binding |
| Δfst4 | 8-day | 2623333 | down | GO:0003677 | 1,94E-08 | DNA binding |
| Δfst4 | 8-day | 2625496 | down | GO:0003677 | 1,94E-08 | DNA binding |
| Δfst4 | 8-day | 2625706 | down | GO:0003677 | 1,94E-08 | DNA binding |
| Δfst4 | 8-day | 2629497 | down | GO:0003677 | 1,94E-08 | DNA binding |
| Δfst4 | 8-day | 2703742 | down | GO:0003677 | 1,94E-08 | DNA binding |

|       |       |         |      |            |          |                    |
|-------|-------|---------|------|------------|----------|--------------------|
| Δfst4 | 8-day | 1127007 | down | GO:0000166 | 2,57E-08 | nucleotide binding |
| Δfst4 | 8-day | 2493870 | down | GO:0000166 | 2,57E-08 | nucleotide binding |
| Δfst4 | 8-day | 2504654 | down | GO:0000166 | 2,57E-08 | nucleotide binding |
| Δfst4 | 8-day | 2512873 | down | GO:0000166 | 2,57E-08 | nucleotide binding |
| Δfst4 | 8-day | 2565471 | down | GO:0000166 | 2,57E-08 | nucleotide binding |
| Δfst4 | 8-day | 2661112 | down | GO:0000166 | 2,57E-08 | nucleotide binding |
| Δfst4 | 8-day | 2748506 | down | GO:0000166 | 2,57E-08 | nucleotide binding |
| Δfst4 | 8-day | 1131965 | down | GO:0008152 | 2,16E-07 | metabolic process  |
| Δfst4 | 8-day | 1152293 | down | GO:0008152 | 2,16E-07 | metabolic process  |
| Δfst4 | 8-day | 1156481 | down | GO:0008152 | 2,16E-07 | metabolic process  |
| Δfst4 | 8-day | 1193333 | down | GO:0008152 | 2,16E-07 | metabolic process  |
| Δfst4 | 8-day | 1200798 | down | GO:0008152 | 2,16E-07 | metabolic process  |
| Δfst4 | 8-day | 2072306 | down | GO:0008152 | 2,16E-07 | metabolic process  |
| Δfst4 | 8-day | 2110046 | down | GO:0008152 | 2,16E-07 | metabolic process  |
| Δfst4 | 8-day | 2135332 | down | GO:0008152 | 2,16E-07 | metabolic process  |
| Δfst4 | 8-day | 2333133 | down | GO:0008152 | 2,16E-07 | metabolic process  |
| Δfst4 | 8-day | 2350414 | down | GO:0008152 | 2,16E-07 | metabolic process  |
| Δfst4 | 8-day | 2373661 | down | GO:0008152 | 2,16E-07 | metabolic process  |
| Δfst4 | 8-day | 2485727 | down | GO:0008152 | 2,16E-07 | metabolic process  |
| Δfst4 | 8-day | 2492878 | down | GO:0008152 | 2,16E-07 | metabolic process  |
| Δfst4 | 8-day | 2495855 | down | GO:0008152 | 2,16E-07 | metabolic process  |
| Δfst4 | 8-day | 2505594 | down | GO:0008152 | 2,16E-07 | metabolic process  |
| Δfst4 | 8-day | 2510775 | down | GO:0008152 | 2,16E-07 | metabolic process  |
| Δfst4 | 8-day | 2511020 | down | GO:0008152 | 2,16E-07 | metabolic process  |
| Δfst4 | 8-day | 2515850 | down | GO:0008152 | 2,16E-07 | metabolic process  |
| Δfst4 | 8-day | 2530601 | down | GO:0008152 | 2,16E-07 | metabolic process  |
| Δfst4 | 8-day | 2533120 | down | GO:0008152 | 2,16E-07 | metabolic process  |
| Δfst4 | 8-day | 2534187 | down | GO:0008152 | 2,16E-07 | metabolic process  |
| Δfst4 | 8-day | 2572586 | down | GO:0008152 | 2,16E-07 | metabolic process  |
| Δfst4 | 8-day | 2575853 | down | GO:0008152 | 2,16E-07 | metabolic process  |
| Δfst4 | 8-day | 2587289 | down | GO:0008152 | 2,16E-07 | metabolic process  |
| Δfst4 | 8-day | 2591025 | down | GO:0008152 | 2,16E-07 | metabolic process  |
| Δfst4 | 8-day | 2591516 | down | GO:0008152 | 2,16E-07 | metabolic process  |
| Δfst4 | 8-day | 2595361 | down | GO:0008152 | 2,16E-07 | metabolic process  |

|       |       |         |      |            |          |                   |
|-------|-------|---------|------|------------|----------|-------------------|
| Δfst4 | 8-day | 2601905 | down | GO:0008152 | 2,16E-07 | metabolic process |
| Δfst4 | 8-day | 2604699 | down | GO:0008152 | 2,16E-07 | metabolic process |
| Δfst4 | 8-day | 2604917 | down | GO:0008152 | 2,16E-07 | metabolic process |
| Δfst4 | 8-day | 2608380 | down | GO:0008152 | 2,16E-07 | metabolic process |
| Δfst4 | 8-day | 2608416 | down | GO:0008152 | 2,16E-07 | metabolic process |
| Δfst4 | 8-day | 2609281 | down | GO:0008152 | 2,16E-07 | metabolic process |
| Δfst4 | 8-day | 2610587 | down | GO:0008152 | 2,16E-07 | metabolic process |
| Δfst4 | 8-day | 2610599 | down | GO:0008152 | 2,16E-07 | metabolic process |
| Δfst4 | 8-day | 2611001 | down | GO:0008152 | 2,16E-07 | metabolic process |
| Δfst4 | 8-day | 2611306 | down | GO:0008152 | 2,16E-07 | metabolic process |
| Δfst4 | 8-day | 2612591 | down | GO:0008152 | 2,16E-07 | metabolic process |
| Δfst4 | 8-day | 2615529 | down | GO:0008152 | 2,16E-07 | metabolic process |
| Δfst4 | 8-day | 2615598 | down | GO:0008152 | 2,16E-07 | metabolic process |
| Δfst4 | 8-day | 2616264 | down | GO:0008152 | 2,16E-07 | metabolic process |
| Δfst4 | 8-day | 2616512 | down | GO:0008152 | 2,16E-07 | metabolic process |
| Δfst4 | 8-day | 2616602 | down | GO:0008152 | 2,16E-07 | metabolic process |
| Δfst4 | 8-day | 2616676 | down | GO:0008152 | 2,16E-07 | metabolic process |
| Δfst4 | 8-day | 2622087 | down | GO:0008152 | 2,16E-07 | metabolic process |
| Δfst4 | 8-day | 2622385 | down | GO:0008152 | 2,16E-07 | metabolic process |
| Δfst4 | 8-day | 2623062 | down | GO:0008152 | 2,16E-07 | metabolic process |
| Δfst4 | 8-day | 2623103 | down | GO:0008152 | 2,16E-07 | metabolic process |
| Δfst4 | 8-day | 2623956 | down | GO:0008152 | 2,16E-07 | metabolic process |
| Δfst4 | 8-day | 2625208 | down | GO:0008152 | 2,16E-07 | metabolic process |
| Δfst4 | 8-day | 2625706 | down | GO:0008152 | 2,16E-07 | metabolic process |
| Δfst4 | 8-day | 2625782 | down | GO:0008152 | 2,16E-07 | metabolic process |
| Δfst4 | 8-day | 2627113 | down | GO:0008152 | 2,16E-07 | metabolic process |
| Δfst4 | 8-day | 2629497 | down | GO:0008152 | 2,16E-07 | metabolic process |
| Δfst4 | 8-day | 2629526 | down | GO:0008152 | 2,16E-07 | metabolic process |
| Δfst4 | 8-day | 2629548 | down | GO:0008152 | 2,16E-07 | metabolic process |
| Δfst4 | 8-day | 2630590 | down | GO:0008152 | 2,16E-07 | metabolic process |
| Δfst4 | 8-day | 2631112 | down | GO:0008152 | 2,16E-07 | metabolic process |
| Δfst4 | 8-day | 2631368 | down | GO:0008152 | 2,16E-07 | metabolic process |
| Δfst4 | 8-day | 2631774 | down | GO:0008152 | 2,16E-07 | metabolic process |
| Δfst4 | 8-day | 2632611 | down | GO:0008152 | 2,16E-07 | metabolic process |

|       |       |         |      |            |          |                                    |
|-------|-------|---------|------|------------|----------|------------------------------------|
| Δfst4 | 8-day | 2633167 | down | GO:0008152 | 2,16E-07 | metabolic process                  |
| Δfst4 | 8-day | 2633644 | down | GO:0008152 | 2,16E-07 | metabolic process                  |
| Δfst4 | 8-day | 2633989 | down | GO:0008152 | 2,16E-07 | metabolic process                  |
| Δfst4 | 8-day | 2634044 | down | GO:0008152 | 2,16E-07 | metabolic process                  |
| Δfst4 | 8-day | 2635567 | down | GO:0008152 | 2,16E-07 | metabolic process                  |
| Δfst4 | 8-day | 2636283 | down | GO:0008152 | 2,16E-07 | metabolic process                  |
| Δfst4 | 8-day | 2637104 | down | GO:0008152 | 2,16E-07 | metabolic process                  |
| Δfst4 | 8-day | 2637221 | down | GO:0008152 | 2,16E-07 | metabolic process                  |
| Δfst4 | 8-day | 2637668 | down | GO:0008152 | 2,16E-07 | metabolic process                  |
| Δfst4 | 8-day | 2638322 | down | GO:0008152 | 2,16E-07 | metabolic process                  |
| Δfst4 | 8-day | 2641506 | down | GO:0008152 | 2,16E-07 | metabolic process                  |
| Δfst4 | 8-day | 2641520 | down | GO:0008152 | 2,16E-07 | metabolic process                  |
| Δfst4 | 8-day | 2641761 | down | GO:0008152 | 2,16E-07 | metabolic process                  |
| Δfst4 | 8-day | 2644309 | down | GO:0008152 | 2,16E-07 | metabolic process                  |
| Δfst4 | 8-day | 2645207 | down | GO:0008152 | 2,16E-07 | metabolic process                  |
| Δfst4 | 8-day | 2663997 | down | GO:0008152 | 2,16E-07 | metabolic process                  |
| Δfst4 | 8-day | 2666990 | down | GO:0008152 | 2,16E-07 | metabolic process                  |
| Δfst4 | 8-day | 2671785 | down | GO:0008152 | 2,16E-07 | metabolic process                  |
| Δfst4 | 8-day | 2681358 | down | GO:0008152 | 2,16E-07 | metabolic process                  |
| Δfst4 | 8-day | 2693285 | down | GO:0008152 | 2,16E-07 | metabolic process                  |
| Δfst4 | 8-day | 2696676 | down | GO:0008152 | 2,16E-07 | metabolic process                  |
| Δfst4 | 8-day | 2699810 | down | GO:0008152 | 2,16E-07 | metabolic process                  |
| Δfst4 | 8-day | 2738806 | down | GO:0008152 | 2,16E-07 | metabolic process                  |
| Δfst4 | 8-day | 1127007 | down | GO:0017111 | 3,53E-06 | nucleoside-triphosphatase activity |
| Δfst4 | 8-day | 2493870 | down | GO:0017111 | 3,53E-06 | nucleoside-triphosphatase activity |
| Δfst4 | 8-day | 2565471 | down | GO:0017111 | 3,53E-06 | nucleoside-triphosphatase activity |
| Δfst4 | 8-day | 2661112 | down | GO:0017111 | 3,53E-06 | nucleoside-triphosphatase activity |
| Δfst4 | 8-day | 1093363 | down | GO:0003824 | 7,43E-06 | catalytic activity                 |
| Δfst4 | 8-day | 1131965 | down | GO:0003824 | 7,43E-06 | catalytic activity                 |
| Δfst4 | 8-day | 1152293 | down | GO:0003824 | 7,43E-06 | catalytic activity                 |
| Δfst4 | 8-day | 1158760 | down | GO:0003824 | 7,43E-06 | catalytic activity                 |
| Δfst4 | 8-day | 1160309 | down | GO:0003824 | 7,43E-06 | catalytic activity                 |
| Δfst4 | 8-day | 1185226 | down | GO:0003824 | 7,43E-06 | catalytic activity                 |
| Δfst4 | 8-day | 1191999 | down | GO:0003824 | 7,43E-06 | catalytic activity                 |

|       |       |         |      |            |          |                    |
|-------|-------|---------|------|------------|----------|--------------------|
| Δfst4 | 8-day | 1193333 | down | GO:0003824 | 7,43E-06 | catalytic activity |
| Δfst4 | 8-day | 1200798 | down | GO:0003824 | 7,43E-06 | catalytic activity |
| Δfst4 | 8-day | 2055308 | down | GO:0003824 | 7,43E-06 | catalytic activity |
| Δfst4 | 8-day | 2072306 | down | GO:0003824 | 7,43E-06 | catalytic activity |
| Δfst4 | 8-day | 2110046 | down | GO:0003824 | 7,43E-06 | catalytic activity |
| Δfst4 | 8-day | 2135332 | down | GO:0003824 | 7,43E-06 | catalytic activity |
| Δfst4 | 8-day | 2333133 | down | GO:0003824 | 7,43E-06 | catalytic activity |
| Δfst4 | 8-day | 2350414 | down | GO:0003824 | 7,43E-06 | catalytic activity |
| Δfst4 | 8-day | 2373661 | down | GO:0003824 | 7,43E-06 | catalytic activity |
| Δfst4 | 8-day | 2492878 | down | GO:0003824 | 7,43E-06 | catalytic activity |
| Δfst4 | 8-day | 2495855 | down | GO:0003824 | 7,43E-06 | catalytic activity |
| Δfst4 | 8-day | 2510775 | down | GO:0003824 | 7,43E-06 | catalytic activity |
| Δfst4 | 8-day | 2511020 | down | GO:0003824 | 7,43E-06 | catalytic activity |
| Δfst4 | 8-day | 2512030 | down | GO:0003824 | 7,43E-06 | catalytic activity |
| Δfst4 | 8-day | 2512873 | down | GO:0003824 | 7,43E-06 | catalytic activity |
| Δfst4 | 8-day | 2516444 | down | GO:0003824 | 7,43E-06 | catalytic activity |
| Δfst4 | 8-day | 2530601 | down | GO:0003824 | 7,43E-06 | catalytic activity |
| Δfst4 | 8-day | 2557656 | down | GO:0003824 | 7,43E-06 | catalytic activity |
| Δfst4 | 8-day | 2572586 | down | GO:0003824 | 7,43E-06 | catalytic activity |
| Δfst4 | 8-day | 2575853 | down | GO:0003824 | 7,43E-06 | catalytic activity |
| Δfst4 | 8-day | 2587289 | down | GO:0003824 | 7,43E-06 | catalytic activity |
| Δfst4 | 8-day | 2591516 | down | GO:0003824 | 7,43E-06 | catalytic activity |
| Δfst4 | 8-day | 2595361 | down | GO:0003824 | 7,43E-06 | catalytic activity |
| Δfst4 | 8-day | 2598960 | down | GO:0003824 | 7,43E-06 | catalytic activity |
| Δfst4 | 8-day | 2604699 | down | GO:0003824 | 7,43E-06 | catalytic activity |
| Δfst4 | 8-day | 2608014 | down | GO:0003824 | 7,43E-06 | catalytic activity |
| Δfst4 | 8-day | 2609281 | down | GO:0003824 | 7,43E-06 | catalytic activity |
| Δfst4 | 8-day | 2610587 | down | GO:0003824 | 7,43E-06 | catalytic activity |
| Δfst4 | 8-day | 2610599 | down | GO:0003824 | 7,43E-06 | catalytic activity |
| Δfst4 | 8-day | 2612591 | down | GO:0003824 | 7,43E-06 | catalytic activity |
| Δfst4 | 8-day | 2614163 | down | GO:0003824 | 7,43E-06 | catalytic activity |
| Δfst4 | 8-day | 2615529 | down | GO:0003824 | 7,43E-06 | catalytic activity |
| Δfst4 | 8-day | 2615598 | down | GO:0003824 | 7,43E-06 | catalytic activity |
| Δfst4 | 8-day | 2616264 | down | GO:0003824 | 7,43E-06 | catalytic activity |



|       |       |         |      |            |          |                    |
|-------|-------|---------|------|------------|----------|--------------------|
| Δfst4 | 8-day | 2616491 | down | GO:0003824 | 7,43E-06 | catalytic activity |
| Δfst4 | 8-day | 2616512 | down | GO:0003824 | 7,43E-06 | catalytic activity |
| Δfst4 | 8-day | 2616602 | down | GO:0003824 | 7,43E-06 | catalytic activity |
| Δfst4 | 8-day | 2616873 | down | GO:0003824 | 7,43E-06 | catalytic activity |
| Δfst4 | 8-day | 2620185 | down | GO:0003824 | 7,43E-06 | catalytic activity |
| Δfst4 | 8-day | 2623062 | down | GO:0003824 | 7,43E-06 | catalytic activity |
| Δfst4 | 8-day | 2623103 | down | GO:0003824 | 7,43E-06 | catalytic activity |
| Δfst4 | 8-day | 2625782 | down | GO:0003824 | 7,43E-06 | catalytic activity |
| Δfst4 | 8-day | 2626529 | down | GO:0003824 | 7,43E-06 | catalytic activity |
| Δfst4 | 8-day | 2626643 | down | GO:0003824 | 7,43E-06 | catalytic activity |
| Δfst4 | 8-day | 2627113 | down | GO:0003824 | 7,43E-06 | catalytic activity |
| Δfst4 | 8-day | 2629526 | down | GO:0003824 | 7,43E-06 | catalytic activity |
| Δfst4 | 8-day | 2629548 | down | GO:0003824 | 7,43E-06 | catalytic activity |
| Δfst4 | 8-day | 2630590 | down | GO:0003824 | 7,43E-06 | catalytic activity |
| Δfst4 | 8-day | 2630634 | down | GO:0003824 | 7,43E-06 | catalytic activity |
| Δfst4 | 8-day | 2630806 | down | GO:0003824 | 7,43E-06 | catalytic activity |
| Δfst4 | 8-day | 2631112 | down | GO:0003824 | 7,43E-06 | catalytic activity |
| Δfst4 | 8-day | 2631368 | down | GO:0003824 | 7,43E-06 | catalytic activity |
| Δfst4 | 8-day | 2631634 | down | GO:0003824 | 7,43E-06 | catalytic activity |
| Δfst4 | 8-day | 2631920 | down | GO:0003824 | 7,43E-06 | catalytic activity |
| Δfst4 | 8-day | 2632611 | down | GO:0003824 | 7,43E-06 | catalytic activity |
| Δfst4 | 8-day | 2633144 | down | GO:0003824 | 7,43E-06 | catalytic activity |
| Δfst4 | 8-day | 2633167 | down | GO:0003824 | 7,43E-06 | catalytic activity |
| Δfst4 | 8-day | 2635216 | down | GO:0003824 | 7,43E-06 | catalytic activity |
| Δfst4 | 8-day | 2635567 | down | GO:0003824 | 7,43E-06 | catalytic activity |
| Δfst4 | 8-day | 2636283 | down | GO:0003824 | 7,43E-06 | catalytic activity |
| Δfst4 | 8-day | 2636333 | down | GO:0003824 | 7,43E-06 | catalytic activity |
| Δfst4 | 8-day | 2636417 | down | GO:0003824 | 7,43E-06 | catalytic activity |
| Δfst4 | 8-day | 2636420 | down | GO:0003824 | 7,43E-06 | catalytic activity |
| Δfst4 | 8-day | 2636681 | down | GO:0003824 | 7,43E-06 | catalytic activity |
| Δfst4 | 8-day | 2637104 | down | GO:0003824 | 7,43E-06 | catalytic activity |
| Δfst4 | 8-day | 2637668 | down | GO:0003824 | 7,43E-06 | catalytic activity |
| Δfst4 | 8-day | 2637845 | down | GO:0003824 | 7,43E-06 | catalytic activity |
| Δfst4 | 8-day | 2638783 | down | GO:0003824 | 7,43E-06 | catalytic activity |

|       |       |         |      |            |          |                         |
|-------|-------|---------|------|------------|----------|-------------------------|
| Δfst4 | 8-day | 2638893 | down | GO:0003824 | 7,43E-06 | catalytic activity      |
| Δfst4 | 8-day | 2641506 | down | GO:0003824 | 7,43E-06 | catalytic activity      |
| Δfst4 | 8-day | 2641520 | down | GO:0003824 | 7,43E-06 | catalytic activity      |
| Δfst4 | 8-day | 2642057 | down | GO:0003824 | 7,43E-06 | catalytic activity      |
| Δfst4 | 8-day | 2642275 | down | GO:0003824 | 7,43E-06 | catalytic activity      |
| Δfst4 | 8-day | 2642438 | down | GO:0003824 | 7,43E-06 | catalytic activity      |
| Δfst4 | 8-day | 2644309 | down | GO:0003824 | 7,43E-06 | catalytic activity      |
| Δfst4 | 8-day | 2645207 | down | GO:0003824 | 7,43E-06 | catalytic activity      |
| Δfst4 | 8-day | 2663997 | down | GO:0003824 | 7,43E-06 | catalytic activity      |
| Δfst4 | 8-day | 2666990 | down | GO:0003824 | 7,43E-06 | catalytic activity      |
| Δfst4 | 8-day | 2676633 | down | GO:0003824 | 7,43E-06 | catalytic activity      |
| Δfst4 | 8-day | 2681358 | down | GO:0003824 | 7,43E-06 | catalytic activity      |
| Δfst4 | 8-day | 2684249 | down | GO:0003824 | 7,43E-06 | catalytic activity      |
| Δfst4 | 8-day | 2693285 | down | GO:0003824 | 7,43E-06 | catalytic activity      |
| Δfst4 | 8-day | 2699217 | down | GO:0003824 | 7,43E-06 | catalytic activity      |
| Δfst4 | 8-day | 2504654 | down | GO:0005737 | 8,55E-06 | cytoplasm               |
| Δfst4 | 8-day | 2512873 | down | GO:0005737 | 8,55E-06 | cytoplasm               |
| Δfst4 | 8-day | 2607695 | down | GO:0005737 | 8,55E-06 | cytoplasm               |
| Δfst4 | 8-day | 2748506 | down | GO:0005737 | 8,55E-06 | cytoplasm               |
| Δfst4 | 8-day | 257768  | down | GO:0016491 | 4,54E-05 | oxidoreductase activity |
| Δfst4 | 8-day | 1131965 | down | GO:0016491 | 4,54E-05 | oxidoreductase activity |
| Δfst4 | 8-day | 1147332 | down | GO:0016491 | 4,54E-05 | oxidoreductase activity |
| Δfst4 | 8-day | 1152293 | down | GO:0016491 | 4,54E-05 | oxidoreductase activity |
| Δfst4 | 8-day | 1156481 | down | GO:0016491 | 4,54E-05 | oxidoreductase activity |
| Δfst4 | 8-day | 1160309 | down | GO:0016491 | 4,54E-05 | oxidoreductase activity |
| Δfst4 | 8-day | 1350659 | down | GO:0016491 | 4,54E-05 | oxidoreductase activity |
| Δfst4 | 8-day | 2072306 | down | GO:0016491 | 4,54E-05 | oxidoreductase activity |
| Δfst4 | 8-day | 2110046 | down | GO:0016491 | 4,54E-05 | oxidoreductase activity |
| Δfst4 | 8-day | 2333133 | down | GO:0016491 | 4,54E-05 | oxidoreductase activity |
| Δfst4 | 8-day | 2495855 | down | GO:0016491 | 4,54E-05 | oxidoreductase activity |
| Δfst4 | 8-day | 2498327 | down | GO:0016491 | 4,54E-05 | oxidoreductase activity |
| Δfst4 | 8-day | 2503108 | down | GO:0016491 | 4,54E-05 | oxidoreductase activity |
| Δfst4 | 8-day | 2504654 | down | GO:0016491 | 4,54E-05 | oxidoreductase activity |
| Δfst4 | 8-day | 2515850 | down | GO:0016491 | 4,54E-05 | oxidoreductase activity |

|       |       |         |      |            |          |                         |
|-------|-------|---------|------|------------|----------|-------------------------|
| Δfst4 | 8-day | 2516444 | down | GO:0016491 | 4,54E-05 | oxidoreductase activity |
| Δfst4 | 8-day | 2532967 | down | GO:0016491 | 4,54E-05 | oxidoreductase activity |
| Δfst4 | 8-day | 2534187 | down | GO:0016491 | 4,54E-05 | oxidoreductase activity |
| Δfst4 | 8-day | 2575853 | down | GO:0016491 | 4,54E-05 | oxidoreductase activity |
| Δfst4 | 8-day | 2587289 | down | GO:0016491 | 4,54E-05 | oxidoreductase activity |
| Δfst4 | 8-day | 2591025 | down | GO:0016491 | 4,54E-05 | oxidoreductase activity |
| Δfst4 | 8-day | 2591516 | down | GO:0016491 | 4,54E-05 | oxidoreductase activity |
| Δfst4 | 8-day | 2603449 | down | GO:0016491 | 4,54E-05 | oxidoreductase activity |
| Δfst4 | 8-day | 2604699 | down | GO:0016491 | 4,54E-05 | oxidoreductase activity |
| Δfst4 | 8-day | 2609281 | down | GO:0016491 | 4,54E-05 | oxidoreductase activity |
| Δfst4 | 8-day | 2610587 | down | GO:0016491 | 4,54E-05 | oxidoreductase activity |
| Δfst4 | 8-day | 2610599 | down | GO:0016491 | 4,54E-05 | oxidoreductase activity |
| Δfst4 | 8-day | 2611001 | down | GO:0016491 | 4,54E-05 | oxidoreductase activity |
| Δfst4 | 8-day | 2611263 | down | GO:0016491 | 4,54E-05 | oxidoreductase activity |
| Δfst4 | 8-day | 2612591 | down | GO:0016491 | 4,54E-05 | oxidoreductase activity |
| Δfst4 | 8-day | 2614858 | down | GO:0016491 | 4,54E-05 | oxidoreductase activity |
| Δfst4 | 8-day | 2615184 | down | GO:0016491 | 4,54E-05 | oxidoreductase activity |
| Δfst4 | 8-day | 2622733 | down | GO:0016491 | 4,54E-05 | oxidoreductase activity |
| Δfst4 | 8-day | 2624407 | down | GO:0016491 | 4,54E-05 | oxidoreductase activity |
| Δfst4 | 8-day | 2625208 | down | GO:0016491 | 4,54E-05 | oxidoreductase activity |
| Δfst4 | 8-day | 2625917 | down | GO:0016491 | 4,54E-05 | oxidoreductase activity |
| Δfst4 | 8-day | 2627113 | down | GO:0016491 | 4,54E-05 | oxidoreductase activity |
| Δfst4 | 8-day | 2628264 | down | GO:0016491 | 4,54E-05 | oxidoreductase activity |
| Δfst4 | 8-day | 2629526 | down | GO:0016491 | 4,54E-05 | oxidoreductase activity |
| Δfst4 | 8-day | 2630033 | down | GO:0016491 | 4,54E-05 | oxidoreductase activity |
| Δfst4 | 8-day | 2630590 | down | GO:0016491 | 4,54E-05 | oxidoreductase activity |
| Δfst4 | 8-day | 2631774 | down | GO:0016491 | 4,54E-05 | oxidoreductase activity |
| Δfst4 | 8-day | 2633167 | down | GO:0016491 | 4,54E-05 | oxidoreductase activity |
| Δfst4 | 8-day | 2634044 | down | GO:0016491 | 4,54E-05 | oxidoreductase activity |
| Δfst4 | 8-day | 2635567 | down | GO:0016491 | 4,54E-05 | oxidoreductase activity |
| Δfst4 | 8-day | 2637104 | down | GO:0016491 | 4,54E-05 | oxidoreductase activity |
| Δfst4 | 8-day | 2638893 | down | GO:0016491 | 4,54E-05 | oxidoreductase activity |
| Δfst4 | 8-day | 2641506 | down | GO:0016491 | 4,54E-05 | oxidoreductase activity |
| Δfst4 | 8-day | 2641520 | down | GO:0016491 | 4,54E-05 | oxidoreductase activity |

|       |       |         |      |            |             |                             |
|-------|-------|---------|------|------------|-------------|-----------------------------|
| Δfst4 | 8-day | 2642438 | down | GO:0016491 | 4,54E-05    | oxidoreductase activity     |
| Δfst4 | 8-day | 2661224 | down | GO:0016491 | 4,54E-05    | oxidoreductase activity     |
| Δfst4 | 8-day | 2671386 | down | GO:0016491 | 4,54E-05    | oxidoreductase activity     |
| Δfst4 | 8-day | 2671785 | down | GO:0016491 | 4,54E-05    | oxidoreductase activity     |
| Δfst4 | 8-day | 2743308 | down | GO:0016491 | 4,54E-05    | oxidoreductase activity     |
| Δfst4 | 8-day | 2493870 | down | GO:0016887 | 6,16E-05    | ATPase activity             |
| Δfst4 | 8-day | 2565471 | down | GO:0016887 | 6,16E-05    | ATPase activity             |
| Δfst4 | 8-day | 2661112 | down | GO:0016887 | 6,16E-05    | ATPase activity             |
| Δfst4 | 8-day | 2677580 | down | GO:0016887 | 6,16E-05    | ATPase activity             |
| Δfst4 | 8-day | 2695021 | down | GO:0016887 | 6,16E-05    | ATPase activity             |
| Δfst4 | 8-day | 2623956 | down | GO:0030170 | 0,000350904 | pyridoxal phosphate binding |
| Δfst4 | 8-day | 2632714 | down | GO:0030170 | 0,000350904 | pyridoxal phosphate binding |
| Δfst4 | 8-day | 2636719 | down | GO:0030170 | 0,000350904 | pyridoxal phosphate binding |
| Δfst4 | 8-day | 2663997 | down | GO:0030170 | 0,000350904 | pyridoxal phosphate binding |
| Δfst4 | 8-day | 78628   | down | GO:0020037 | 0,000672113 | heme binding                |
| Δfst4 | 8-day | 1131542 | down | GO:0020037 | 0,000672113 | heme binding                |
| Δfst4 | 8-day | 1159597 | down | GO:0020037 | 0,000672113 | heme binding                |
| Δfst4 | 8-day | 1189794 | down | GO:0020037 | 0,000672113 | heme binding                |
| Δfst4 | 8-day | 2486680 | down | GO:0020037 | 0,000672113 | heme binding                |
| Δfst4 | 8-day | 2509716 | down | GO:0020037 | 0,000672113 | heme binding                |
| Δfst4 | 8-day | 2516208 | down | GO:0020037 | 0,000672113 | heme binding                |
| Δfst4 | 8-day | 2559987 | down | GO:0020037 | 0,000672113 | heme binding                |
| Δfst4 | 8-day | 2594763 | down | GO:0020037 | 0,000672113 | heme binding                |
| Δfst4 | 8-day | 2604735 | down | GO:0020037 | 0,000672113 | heme binding                |
| Δfst4 | 8-day | 2611771 | down | GO:0020037 | 0,000672113 | heme binding                |
| Δfst4 | 8-day | 2614692 | down | GO:0020037 | 0,000672113 | heme binding                |
| Δfst4 | 8-day | 2614998 | down | GO:0020037 | 0,000672113 | heme binding                |
| Δfst4 | 8-day | 2616590 | down | GO:0020037 | 0,000672113 | heme binding                |
| Δfst4 | 8-day | 2619674 | down | GO:0020037 | 0,000672113 | heme binding                |
| Δfst4 | 8-day | 2619910 | down | GO:0020037 | 0,000672113 | heme binding                |
| Δfst4 | 8-day | 2621855 | down | GO:0020037 | 0,000672113 | heme binding                |
| Δfst4 | 8-day | 2628312 | down | GO:0020037 | 0,000672113 | heme binding                |
| Δfst4 | 8-day | 2628651 | down | GO:0020037 | 0,000672113 | heme binding                |
| Δfst4 | 8-day | 2634186 | down | GO:0020037 | 0,000672113 | heme binding                |

|       |       |         |      |            |             |              |
|-------|-------|---------|------|------------|-------------|--------------|
| Δfst4 | 8-day | 2635487 | down | GO:0020037 | 0,000672113 | heme binding |
| Δfst4 | 8-day | 2638355 | down | GO:0020037 | 0,000672113 | heme binding |
| Δfst4 | 8-day | 2703965 | down | GO:0020037 | 0,000672113 | heme binding |
| Δfst4 | 8-day | 2703966 | down | GO:0020037 | 0,000672113 | heme binding |
| Δfst4 | 8-day | 2705258 | down | GO:0020037 | 0,000672113 | heme binding |
| Δfst4 | 8-day | 70808   | down | GO:0005634 | 0,001013596 | nucleus      |
| Δfst4 | 8-day | 250298  | down | GO:0005634 | 0,001013596 | nucleus      |
| Δfst4 | 8-day | 1156706 | down | GO:0005634 | 0,001013596 | nucleus      |
| Δfst4 | 8-day | 2151391 | down | GO:0005634 | 0,001013596 | nucleus      |
| Δfst4 | 8-day | 2510481 | down | GO:0005634 | 0,001013596 | nucleus      |
| Δfst4 | 8-day | 2515078 | down | GO:0005634 | 0,001013596 | nucleus      |
| Δfst4 | 8-day | 2596857 | down | GO:0005634 | 0,001013596 | nucleus      |
| Δfst4 | 8-day | 2598013 | down | GO:0005634 | 0,001013596 | nucleus      |
| Δfst4 | 8-day | 2605931 | down | GO:0005634 | 0,001013596 | nucleus      |
| Δfst4 | 8-day | 2608180 | down | GO:0005634 | 0,001013596 | nucleus      |
| Δfst4 | 8-day | 2608348 | down | GO:0005634 | 0,001013596 | nucleus      |
| Δfst4 | 8-day | 2609231 | down | GO:0005634 | 0,001013596 | nucleus      |
| Δfst4 | 8-day | 2610202 | down | GO:0005634 | 0,001013596 | nucleus      |
| Δfst4 | 8-day | 2613385 | down | GO:0005634 | 0,001013596 | nucleus      |
| Δfst4 | 8-day | 2615561 | down | GO:0005634 | 0,001013596 | nucleus      |
| Δfst4 | 8-day | 2620175 | down | GO:0005634 | 0,001013596 | nucleus      |
| Δfst4 | 8-day | 2625496 | down | GO:0005634 | 0,001013596 | nucleus      |
| Δfst4 | 8-day | 2627369 | down | GO:0005634 | 0,001013596 | nucleus      |
| Δfst4 | 8-day | 2632395 | down | GO:0005634 | 0,001013596 | nucleus      |
| Δfst4 | 8-day | 2642040 | down | GO:0005634 | 0,001013596 | nucleus      |
| Δfst4 | 8-day | 2645939 | down | GO:0005634 | 0,001013596 | nucleus      |
| Δfst4 | 8-day | 2689617 | down | GO:0005634 | 0,001013596 | nucleus      |
| Δfst4 | 8-day | 2703742 | down | GO:0005634 | 0,001013596 | nucleus      |
| Δfst4 | 8-day | 2746123 | down | GO:0005634 | 0,001013596 | nucleus      |
| Δfst4 | 8-day | 1077503 | down | GO:0006810 | 0,001159639 | transport    |
| Δfst4 | 8-day | 1100962 | down | GO:0006810 | 0,001159639 | transport    |
| Δfst4 | 8-day | 1129508 | down | GO:0006810 | 0,001159639 | transport    |
| Δfst4 | 8-day | 1144263 | down | GO:0006810 | 0,001159639 | transport    |
| Δfst4 | 8-day | 1147635 | down | GO:0006810 | 0,001159639 | transport    |

|       |       |         |      |            |             |           |
|-------|-------|---------|------|------------|-------------|-----------|
| Δfst4 | 8-day | 1154281 | down | GO:0006810 | 0,001159639 | transport |
| Δfst4 | 8-day | 1175357 | down | GO:0006810 | 0,001159639 | transport |
| Δfst4 | 8-day | 1245995 | down | GO:0006810 | 0,001159639 | transport |
| Δfst4 | 8-day | 1357952 | down | GO:0006810 | 0,001159639 | transport |
| Δfst4 | 8-day | 2138287 | down | GO:0006810 | 0,001159639 | transport |
| Δfst4 | 8-day | 2162840 | down | GO:0006810 | 0,001159639 | transport |
| Δfst4 | 8-day | 2481653 | down | GO:0006810 | 0,001159639 | transport |
| Δfst4 | 8-day | 2491665 | down | GO:0006810 | 0,001159639 | transport |
| Δfst4 | 8-day | 2492878 | down | GO:0006810 | 0,001159639 | transport |
| Δfst4 | 8-day | 2493264 | down | GO:0006810 | 0,001159639 | transport |
| Δfst4 | 8-day | 2501978 | down | GO:0006810 | 0,001159639 | transport |
| Δfst4 | 8-day | 2504863 | down | GO:0006810 | 0,001159639 | transport |
| Δfst4 | 8-day | 2509716 | down | GO:0006810 | 0,001159639 | transport |
| Δfst4 | 8-day | 2514012 | down | GO:0006810 | 0,001159639 | transport |
| Δfst4 | 8-day | 2519917 | down | GO:0006810 | 0,001159639 | transport |
| Δfst4 | 8-day | 2543225 | down | GO:0006810 | 0,001159639 | transport |
| Δfst4 | 8-day | 2546372 | down | GO:0006810 | 0,001159639 | transport |
| Δfst4 | 8-day | 2550918 | down | GO:0006810 | 0,001159639 | transport |
| Δfst4 | 8-day | 2564524 | down | GO:0006810 | 0,001159639 | transport |
| Δfst4 | 8-day | 2565471 | down | GO:0006810 | 0,001159639 | transport |
| Δfst4 | 8-day | 2600551 | down | GO:0006810 | 0,001159639 | transport |
| Δfst4 | 8-day | 2609987 | down | GO:0006810 | 0,001159639 | transport |
| Δfst4 | 8-day | 2612313 | down | GO:0006810 | 0,001159639 | transport |
| Δfst4 | 8-day | 2616189 | down | GO:0006810 | 0,001159639 | transport |
| Δfst4 | 8-day | 2616602 | down | GO:0006810 | 0,001159639 | transport |
| Δfst4 | 8-day | 2617636 | down | GO:0006810 | 0,001159639 | transport |
| Δfst4 | 8-day | 2617876 | down | GO:0006810 | 0,001159639 | transport |
| Δfst4 | 8-day | 2618539 | down | GO:0006810 | 0,001159639 | transport |
| Δfst4 | 8-day | 2619010 | down | GO:0006810 | 0,001159639 | transport |
| Δfst4 | 8-day | 2620649 | down | GO:0006810 | 0,001159639 | transport |
| Δfst4 | 8-day | 2622598 | down | GO:0006810 | 0,001159639 | transport |
| Δfst4 | 8-day | 2623043 | down | GO:0006810 | 0,001159639 | transport |
| Δfst4 | 8-day | 2623492 | down | GO:0006810 | 0,001159639 | transport |
| Δfst4 | 8-day | 2627701 | down | GO:0006810 | 0,001159639 | transport |

|       |       |         |      |            |             |                      |
|-------|-------|---------|------|------------|-------------|----------------------|
| Δfst4 | 8-day | 2627703 | down | GO:0006810 | 0,001159639 | transport            |
| Δfst4 | 8-day | 2627883 | down | GO:0006810 | 0,001159639 | transport            |
| Δfst4 | 8-day | 2630802 | down | GO:0006810 | 0,001159639 | transport            |
| Δfst4 | 8-day | 2631566 | down | GO:0006810 | 0,001159639 | transport            |
| Δfst4 | 8-day | 2631822 | down | GO:0006810 | 0,001159639 | transport            |
| Δfst4 | 8-day | 2633216 | down | GO:0006810 | 0,001159639 | transport            |
| Δfst4 | 8-day | 2636597 | down | GO:0006810 | 0,001159639 | transport            |
| Δfst4 | 8-day | 2638711 | down | GO:0006810 | 0,001159639 | transport            |
| Δfst4 | 8-day | 2641735 | down | GO:0006810 | 0,001159639 | transport            |
| Δfst4 | 8-day | 2642364 | down | GO:0006810 | 0,001159639 | transport            |
| Δfst4 | 8-day | 2661224 | down | GO:0006810 | 0,001159639 | transport            |
| Δfst4 | 8-day | 2662176 | down | GO:0006810 | 0,001159639 | transport            |
| Δfst4 | 8-day | 2662585 | down | GO:0006810 | 0,001159639 | transport            |
| Δfst4 | 8-day | 2701571 | down | GO:0006810 | 0,001159639 | transport            |
| Δfst4 | 8-day | 2738153 | down | GO:0006810 | 0,001159639 | transport            |
| Δfst4 | 8-day | 2747523 | down | GO:0006810 | 0,001159639 | transport            |
| Δfst4 | 8-day | 2749926 | down | GO:0006810 | 0,001159639 | transport            |
| Δfst4 | 8-day | 1129508 | down | GO:0005215 | 0,002197779 | transporter activity |
| Δfst4 | 8-day | 1144263 | down | GO:0005215 | 0,002197779 | transporter activity |
| Δfst4 | 8-day | 1147635 | down | GO:0005215 | 0,002197779 | transporter activity |
| Δfst4 | 8-day | 1154281 | down | GO:0005215 | 0,002197779 | transporter activity |
| Δfst4 | 8-day | 1175357 | down | GO:0005215 | 0,002197779 | transporter activity |
| Δfst4 | 8-day | 1245995 | down | GO:0005215 | 0,002197779 | transporter activity |
| Δfst4 | 8-day | 1357952 | down | GO:0005215 | 0,002197779 | transporter activity |
| Δfst4 | 8-day | 2138287 | down | GO:0005215 | 0,002197779 | transporter activity |
| Δfst4 | 8-day | 2162840 | down | GO:0005215 | 0,002197779 | transporter activity |
| Δfst4 | 8-day | 2481653 | down | GO:0005215 | 0,002197779 | transporter activity |
| Δfst4 | 8-day | 2491665 | down | GO:0005215 | 0,002197779 | transporter activity |
| Δfst4 | 8-day | 2492878 | down | GO:0005215 | 0,002197779 | transporter activity |
| Δfst4 | 8-day | 2501978 | down | GO:0005215 | 0,002197779 | transporter activity |
| Δfst4 | 8-day | 2504863 | down | GO:0005215 | 0,002197779 | transporter activity |
| Δfst4 | 8-day | 2509716 | down | GO:0005215 | 0,002197779 | transporter activity |
| Δfst4 | 8-day | 2543225 | down | GO:0005215 | 0,002197779 | transporter activity |
| Δfst4 | 8-day | 2546372 | down | GO:0005215 | 0,002197779 | transporter activity |

|       |       |         |      |            |             |                                                                  |
|-------|-------|---------|------|------------|-------------|------------------------------------------------------------------|
| Δfst4 | 8-day | 2550918 | down | GO:0005215 | 0,002197779 | transporter activity                                             |
| Δfst4 | 8-day | 2564524 | down | GO:0005215 | 0,002197779 | transporter activity                                             |
| Δfst4 | 8-day | 2600551 | down | GO:0005215 | 0,002197779 | transporter activity                                             |
| Δfst4 | 8-day | 2612313 | down | GO:0005215 | 0,002197779 | transporter activity                                             |
| Δfst4 | 8-day | 2616189 | down | GO:0005215 | 0,002197779 | transporter activity                                             |
| Δfst4 | 8-day | 2617636 | down | GO:0005215 | 0,002197779 | transporter activity                                             |
| Δfst4 | 8-day | 2618539 | down | GO:0005215 | 0,002197779 | transporter activity                                             |
| Δfst4 | 8-day | 2619010 | down | GO:0005215 | 0,002197779 | transporter activity                                             |
| Δfst4 | 8-day | 2622598 | down | GO:0005215 | 0,002197779 | transporter activity                                             |
| Δfst4 | 8-day | 2623043 | down | GO:0005215 | 0,002197779 | transporter activity                                             |
| Δfst4 | 8-day | 2623492 | down | GO:0005215 | 0,002197779 | transporter activity                                             |
| Δfst4 | 8-day | 2627703 | down | GO:0005215 | 0,002197779 | transporter activity                                             |
| Δfst4 | 8-day | 2627883 | down | GO:0005215 | 0,002197779 | transporter activity                                             |
| Δfst4 | 8-day | 2630802 | down | GO:0005215 | 0,002197779 | transporter activity                                             |
| Δfst4 | 8-day | 2633216 | down | GO:0005215 | 0,002197779 | transporter activity                                             |
| Δfst4 | 8-day | 2636597 | down | GO:0005215 | 0,002197779 | transporter activity                                             |
| Δfst4 | 8-day | 2641735 | down | GO:0005215 | 0,002197779 | transporter activity                                             |
| Δfst4 | 8-day | 2642553 | down | GO:0005215 | 0,002197779 | transporter activity                                             |
| Δfst4 | 8-day | 2661224 | down | GO:0005215 | 0,002197779 | transporter activity                                             |
| Δfst4 | 8-day | 2662176 | down | GO:0005215 | 0,002197779 | transporter activity                                             |
| Δfst4 | 8-day | 2701571 | down | GO:0005215 | 0,002197779 | transporter activity                                             |
| Δfst4 | 8-day | 2738153 | down | GO:0005215 | 0,002197779 | transporter activity                                             |
| Δfst4 | 8-day | 2747523 | down | GO:0005215 | 0,002197779 | transporter activity                                             |
| Δfst4 | 8-day | 2493870 | down | GO:0004003 | 0,002425106 | ATP-dependent DNA helicase activity                              |
| Δfst4 | 8-day | 2625496 | down | GO:0004003 | 0,002425106 | ATP-dependent DNA helicase activity                              |
| Δfst4 | 8-day | 2677580 | down | GO:0004003 | 0,002425106 | ATP-dependent DNA helicase activity                              |
| Δfst4 | 8-day | 2512973 | down | GO:0034061 | 0,002738888 | DNA polymerase activity                                          |
| Δfst4 | 8-day | 2629497 | down | GO:0005694 | 0,002738888 | chromosome                                                       |
| Δfst4 | 8-day | 2493870 | down | GO:0042624 | 0,002738888 | ATPase activity, uncoupled                                       |
| Δfst4 | 8-day | 2677580 | down | GO:0042624 | 0,002738888 | ATPase activity, uncoupled                                       |
| Δfst4 | 8-day | 2493870 | down | GO:0042625 | 0,002738888 | ATPase activity, coupled to transmembrane movement of ions       |
| Δfst4 | 8-day | 2677580 | down | GO:0042625 | 0,002738888 | ATPase activity, coupled to transmembrane movement of ions       |
| Δfst4 | 8-day | 2493870 | down | GO:0042626 | 0,002738888 | ATPase activity, coupled to transmembrane movement of substances |



|               |       |         |      |            |             |                                                                   |
|---------------|-------|---------|------|------------|-------------|-------------------------------------------------------------------|
| $\Delta$ fst4 | 8-day | 2565471 | down | GO:0042626 | 0,002738888 | ATPase activity, coupled to transmembrane movement of substances  |
| $\Delta$ fst4 | 8-day | 2677580 | down | GO:0042626 | 0,002738888 | ATPase activity, coupled to transmembrane movement of substances  |
| $\Delta$ fst4 | 8-day | 2493870 | down | GO:0042623 | 0,002738888 | ATPase activity, coupled                                          |
| $\Delta$ fst4 | 8-day | 2677580 | down | GO:0042623 | 0,002738888 | ATPase activity, coupled                                          |
| $\Delta$ fst4 | 8-day | 2493870 | down | GO:0015462 | 0,002738888 | protein-transmembrane transporting ATPase activity                |
| $\Delta$ fst4 | 8-day | 2677580 | down | GO:0015462 | 0,002738888 | protein-transmembrane transporting ATPase activity                |
| $\Delta$ fst4 | 8-day | 2493870 | down | GO:0017116 | 0,002738888 | single-stranded DNA-dependent ATP-dependent DNA helicase activity |
| $\Delta$ fst4 | 8-day | 2677580 | down | GO:0017116 | 0,002738888 | single-stranded DNA-dependent ATP-dependent DNA helicase activity |
| $\Delta$ fst4 | 8-day | 1192535 | down | GO:0004339 | 0,002738888 | glucan 1,4-alpha-glucosidase activity                             |
| $\Delta$ fst4 | 8-day | 2631634 | down | GO:0004339 | 0,002738888 | glucan 1,4-alpha-glucosidase activity                             |
| $\Delta$ fst4 | 8-day | 78628   | down | GO:0006118 | 0,002738888 | electron transport                                                |
| $\Delta$ fst4 | 8-day | 257768  | down | GO:0006118 | 0,002738888 | electron transport                                                |
| $\Delta$ fst4 | 8-day | 1084124 | down | GO:0006118 | 0,002738888 | electron transport                                                |
| $\Delta$ fst4 | 8-day | 1131542 | down | GO:0006118 | 0,002738888 | electron transport                                                |
| $\Delta$ fst4 | 8-day | 1159597 | down | GO:0006118 | 0,002738888 | electron transport                                                |
| $\Delta$ fst4 | 8-day | 1189794 | down | GO:0006118 | 0,002738888 | electron transport                                                |
| $\Delta$ fst4 | 8-day | 2247626 | down | GO:0006118 | 0,002738888 | electron transport                                                |
| $\Delta$ fst4 | 8-day | 2486680 | down | GO:0006118 | 0,002738888 | electron transport                                                |
| $\Delta$ fst4 | 8-day | 2503108 | down | GO:0006118 | 0,002738888 | electron transport                                                |
| $\Delta$ fst4 | 8-day | 2509716 | down | GO:0006118 | 0,002738888 | electron transport                                                |
| $\Delta$ fst4 | 8-day | 2515850 | down | GO:0006118 | 0,002738888 | electron transport                                                |
| $\Delta$ fst4 | 8-day | 2516208 | down | GO:0006118 | 0,002738888 | electron transport                                                |
| $\Delta$ fst4 | 8-day | 2532967 | down | GO:0006118 | 0,002738888 | electron transport                                                |
| $\Delta$ fst4 | 8-day | 2533120 | down | GO:0006118 | 0,002738888 | electron transport                                                |
| $\Delta$ fst4 | 8-day | 2534187 | down | GO:0006118 | 0,002738888 | electron transport                                                |
| $\Delta$ fst4 | 8-day | 2559987 | down | GO:0006118 | 0,002738888 | electron transport                                                |
| $\Delta$ fst4 | 8-day | 2594763 | down | GO:0006118 | 0,002738888 | electron transport                                                |
| $\Delta$ fst4 | 8-day | 2603449 | down | GO:0006118 | 0,002738888 | electron transport                                                |
| $\Delta$ fst4 | 8-day | 2604735 | down | GO:0006118 | 0,002738888 | electron transport                                                |
| $\Delta$ fst4 | 8-day | 2611771 | down | GO:0006118 | 0,002738888 | electron transport                                                |
| $\Delta$ fst4 | 8-day | 2614692 | down | GO:0006118 | 0,002738888 | electron transport                                                |

|       |       |         |      |            |             |                                                  |
|-------|-------|---------|------|------------|-------------|--------------------------------------------------|
| Δfst4 | 8-day | 2614998 | down | GO:0006118 | 0,002738888 | electron transport                               |
| Δfst4 | 8-day | 2615184 | down | GO:0006118 | 0,002738888 | electron transport                               |
| Δfst4 | 8-day | 2616590 | down | GO:0006118 | 0,002738888 | electron transport                               |
| Δfst4 | 8-day | 2619674 | down | GO:0006118 | 0,002738888 | electron transport                               |
| Δfst4 | 8-day | 2619910 | down | GO:0006118 | 0,002738888 | electron transport                               |
| Δfst4 | 8-day | 2621855 | down | GO:0006118 | 0,002738888 | electron transport                               |
| Δfst4 | 8-day | 2622733 | down | GO:0006118 | 0,002738888 | electron transport                               |
| Δfst4 | 8-day | 2625951 | down | GO:0006118 | 0,002738888 | electron transport                               |
| Δfst4 | 8-day | 2628312 | down | GO:0006118 | 0,002738888 | electron transport                               |
| Δfst4 | 8-day | 2628651 | down | GO:0006118 | 0,002738888 | electron transport                               |
| Δfst4 | 8-day | 2633167 | down | GO:0006118 | 0,002738888 | electron transport                               |
| Δfst4 | 8-day | 2634186 | down | GO:0006118 | 0,002738888 | electron transport                               |
| Δfst4 | 8-day | 2635487 | down | GO:0006118 | 0,002738888 | electron transport                               |
| Δfst4 | 8-day | 2637104 | down | GO:0006118 | 0,002738888 | electron transport                               |
| Δfst4 | 8-day | 2638355 | down | GO:0006118 | 0,002738888 | electron transport                               |
| Δfst4 | 8-day | 2662585 | down | GO:0006118 | 0,002738888 | electron transport                               |
| Δfst4 | 8-day | 2671785 | down | GO:0006118 | 0,002738888 | electron transport                               |
| Δfst4 | 8-day | 2703965 | down | GO:0006118 | 0,002738888 | electron transport                               |
| Δfst4 | 8-day | 2703966 | down | GO:0006118 | 0,002738888 | electron transport                               |
| Δfst4 | 8-day | 2705258 | down | GO:0006118 | 0,002738888 | electron transport                               |
| Δfst4 | 8-day | 2493870 | down | GO:0004004 | 0,002738888 | ATP-dependent RNA helicase activity              |
| Δfst4 | 8-day | 2677580 | down | GO:0004004 | 0,002738888 | ATP-dependent RNA helicase activity              |
| Δfst4 | 8-day | 2493870 | down | GO:0008186 | 0,002738888 | RNA-dependent ATPase activity                    |
| Δfst4 | 8-day | 2677580 | down | GO:0008186 | 0,002738888 | RNA-dependent ATPase activity                    |
| Δfst4 | 8-day | 2512973 | down | GO:0003887 | 0,002875782 | DNA-directed DNA polymerase activity             |
| Δfst4 | 8-day | 2630033 | down | GO:0016717 | 0,002875782 | oxidoreductase activity, acting on paired donors |
| Δfst4 | 8-day | 2493870 | down | GO:0008094 | 0,003085382 | DNA-dependent ATPase activity                    |
| Δfst4 | 8-day | 2677580 | down | GO:0008094 | 0,003085382 | DNA-dependent ATPase activity                    |
| Δfst4 | 8-day | 2369054 | down | GO:0005199 | 0,00432484  | structural constituent of cell wall              |
| Δfst4 | 8-day | 2746250 | down | GO:0005199 | 0,00432484  | structural constituent of cell wall              |
| Δfst4 | 8-day | 78628   | down | GO:0005506 | 0,004403822 | iron ion binding                                 |
| Δfst4 | 8-day | 1131542 | down | GO:0005506 | 0,004403822 | iron ion binding                                 |
| Δfst4 | 8-day | 1159597 | down | GO:0005506 | 0,004403822 | iron ion binding                                 |
| Δfst4 | 8-day | 1189794 | down | GO:0005506 | 0,004403822 | iron ion binding                                 |

|       |       |         |      |            |             |                  |
|-------|-------|---------|------|------------|-------------|------------------|
| Δfst4 | 8-day | 1191999 | down | GO:0005506 | 0,004403822 | iron ion binding |
| Δfst4 | 8-day | 2486680 | down | GO:0005506 | 0,004403822 | iron ion binding |
| Δfst4 | 8-day | 2503108 | down | GO:0005506 | 0,004403822 | iron ion binding |
| Δfst4 | 8-day | 2516208 | down | GO:0005506 | 0,004403822 | iron ion binding |
| Δfst4 | 8-day | 2559987 | down | GO:0005506 | 0,004403822 | iron ion binding |
| Δfst4 | 8-day | 2594763 | down | GO:0005506 | 0,004403822 | iron ion binding |
| Δfst4 | 8-day | 2603449 | down | GO:0005506 | 0,004403822 | iron ion binding |
| Δfst4 | 8-day | 2604735 | down | GO:0005506 | 0,004403822 | iron ion binding |
| Δfst4 | 8-day | 2611771 | down | GO:0005506 | 0,004403822 | iron ion binding |
| Δfst4 | 8-day | 2614692 | down | GO:0005506 | 0,004403822 | iron ion binding |
| Δfst4 | 8-day | 2616590 | down | GO:0005506 | 0,004403822 | iron ion binding |
| Δfst4 | 8-day | 2619674 | down | GO:0005506 | 0,004403822 | iron ion binding |
| Δfst4 | 8-day | 2621855 | down | GO:0005506 | 0,004403822 | iron ion binding |
| Δfst4 | 8-day | 2628312 | down | GO:0005506 | 0,004403822 | iron ion binding |
| Δfst4 | 8-day | 2628651 | down | GO:0005506 | 0,004403822 | iron ion binding |
| Δfst4 | 8-day | 2634186 | down | GO:0005506 | 0,004403822 | iron ion binding |
| Δfst4 | 8-day | 2635487 | down | GO:0005506 | 0,004403822 | iron ion binding |
| Δfst4 | 8-day | 2636420 | down | GO:0005506 | 0,004403822 | iron ion binding |
| Δfst4 | 8-day | 2638355 | down | GO:0005506 | 0,004403822 | iron ion binding |
| Δfst4 | 8-day | 2641761 | down | GO:0005506 | 0,004403822 | iron ion binding |
| Δfst4 | 8-day | 2703965 | down | GO:0005506 | 0,004403822 | iron ion binding |
| Δfst4 | 8-day | 2703966 | down | GO:0005506 | 0,004403822 | iron ion binding |
| Δfst4 | 8-day | 2705258 | down | GO:0005506 | 0,004403822 | iron ion binding |
| Δfst4 | 8-day | 1077503 | down | GO:0016020 | 0,005288077 | membrane         |
| Δfst4 | 8-day | 1093363 | down | GO:0016020 | 0,005288077 | membrane         |
| Δfst4 | 8-day | 1144263 | down | GO:0016020 | 0,005288077 | membrane         |
| Δfst4 | 8-day | 1147635 | down | GO:0016020 | 0,005288077 | membrane         |
| Δfst4 | 8-day | 1160309 | down | GO:0016020 | 0,005288077 | membrane         |
| Δfst4 | 8-day | 1175357 | down | GO:0016020 | 0,005288077 | membrane         |
| Δfst4 | 8-day | 1245995 | down | GO:0016020 | 0,005288077 | membrane         |
| Δfst4 | 8-day | 2138287 | down | GO:0016020 | 0,005288077 | membrane         |
| Δfst4 | 8-day | 2162840 | down | GO:0016020 | 0,005288077 | membrane         |
| Δfst4 | 8-day | 2493264 | down | GO:0016020 | 0,005288077 | membrane         |
| Δfst4 | 8-day | 2514012 | down | GO:0016020 | 0,005288077 | membrane         |

|       |       |         |      |            |             |          |
|-------|-------|---------|------|------------|-------------|----------|
| Δfst4 | 8-day | 2550918 | down | GO:0016020 | 0,005288077 | membrane |
| Δfst4 | 8-day | 2565471 | down | GO:0016020 | 0,005288077 | membrane |
| Δfst4 | 8-day | 2600551 | down | GO:0016020 | 0,005288077 | membrane |
| Δfst4 | 8-day | 2604751 | down | GO:0016020 | 0,005288077 | membrane |
| Δfst4 | 8-day | 2609987 | down | GO:0016020 | 0,005288077 | membrane |
| Δfst4 | 8-day | 2610450 | down | GO:0016020 | 0,005288077 | membrane |
| Δfst4 | 8-day | 2616189 | down | GO:0016020 | 0,005288077 | membrane |
| Δfst4 | 8-day | 2616602 | down | GO:0016020 | 0,005288077 | membrane |
| Δfst4 | 8-day | 2618501 | down | GO:0016020 | 0,005288077 | membrane |
| Δfst4 | 8-day | 2619010 | down | GO:0016020 | 0,005288077 | membrane |
| Δfst4 | 8-day | 2620649 | down | GO:0016020 | 0,005288077 | membrane |
| Δfst4 | 8-day | 2621162 | down | GO:0016020 | 0,005288077 | membrane |
| Δfst4 | 8-day | 2622595 | down | GO:0016020 | 0,005288077 | membrane |
| Δfst4 | 8-day | 2622598 | down | GO:0016020 | 0,005288077 | membrane |
| Δfst4 | 8-day | 2623043 | down | GO:0016020 | 0,005288077 | membrane |
| Δfst4 | 8-day | 2627701 | down | GO:0016020 | 0,005288077 | membrane |
| Δfst4 | 8-day | 2627703 | down | GO:0016020 | 0,005288077 | membrane |
| Δfst4 | 8-day | 2627883 | down | GO:0016020 | 0,005288077 | membrane |
| Δfst4 | 8-day | 2627998 | down | GO:0016020 | 0,005288077 | membrane |
| Δfst4 | 8-day | 2630033 | down | GO:0016020 | 0,005288077 | membrane |
| Δfst4 | 8-day | 2630802 | down | GO:0016020 | 0,005288077 | membrane |
| Δfst4 | 8-day | 2631566 | down | GO:0016020 | 0,005288077 | membrane |
| Δfst4 | 8-day | 2631822 | down | GO:0016020 | 0,005288077 | membrane |
| Δfst4 | 8-day | 2638711 | down | GO:0016020 | 0,005288077 | membrane |
| Δfst4 | 8-day | 2640999 | down | GO:0016020 | 0,005288077 | membrane |
| Δfst4 | 8-day | 2642364 | down | GO:0016020 | 0,005288077 | membrane |
| Δfst4 | 8-day | 2642553 | down | GO:0016020 | 0,005288077 | membrane |
| Δfst4 | 8-day | 2662176 | down | GO:0016020 | 0,005288077 | membrane |
| Δfst4 | 8-day | 2668580 | down | GO:0016020 | 0,005288077 | membrane |
| Δfst4 | 8-day | 2673672 | down | GO:0016020 | 0,005288077 | membrane |
| Δfst4 | 8-day | 2675646 | down | GO:0016020 | 0,005288077 | membrane |
| Δfst4 | 8-day | 2696647 | down | GO:0016020 | 0,005288077 | membrane |
| Δfst4 | 8-day | 2701571 | down | GO:0016020 | 0,005288077 | membrane |
| Δfst4 | 8-day | 2738153 | down | GO:0016020 | 0,005288077 | membrane |

|       |       |         |      |            |             |                     |
|-------|-------|---------|------|------------|-------------|---------------------|
| Δfst4 | 8-day | 2749926 | down | GO:0016020 | 0,005288077 | membrane            |
| Δfst4 | 8-day | 2369054 | down | GO:0005618 | 0,006188309 | cell wall           |
| Δfst4 | 8-day | 1176082 | down | GO:0005509 | 0,006188309 | calcium ion binding |
| Δfst4 | 8-day | 2520635 | down | GO:0005509 | 0,006188309 | calcium ion binding |
| Δfst4 | 8-day | 2673672 | down | GO:0005509 | 0,006188309 | calcium ion binding |
| Δfst4 | 8-day | 1131965 | down | GO:0005488 | 0,006215447 | binding             |
| Δfst4 | 8-day | 1152293 | down | GO:0005488 | 0,006215447 | binding             |
| Δfst4 | 8-day | 1193333 | down | GO:0005488 | 0,006215447 | binding             |
| Δfst4 | 8-day | 1357952 | down | GO:0005488 | 0,006215447 | binding             |
| Δfst4 | 8-day | 2072306 | down | GO:0005488 | 0,006215447 | binding             |
| Δfst4 | 8-day | 2110046 | down | GO:0005488 | 0,006215447 | binding             |
| Δfst4 | 8-day | 2135332 | down | GO:0005488 | 0,006215447 | binding             |
| Δfst4 | 8-day | 2333133 | down | GO:0005488 | 0,006215447 | binding             |
| Δfst4 | 8-day | 2373661 | down | GO:0005488 | 0,006215447 | binding             |
| Δfst4 | 8-day | 2492878 | down | GO:0005488 | 0,006215447 | binding             |
| Δfst4 | 8-day | 2495855 | down | GO:0005488 | 0,006215447 | binding             |
| Δfst4 | 8-day | 2510775 | down | GO:0005488 | 0,006215447 | binding             |
| Δfst4 | 8-day | 2511020 | down | GO:0005488 | 0,006215447 | binding             |
| Δfst4 | 8-day | 2546372 | down | GO:0005488 | 0,006215447 | binding             |
| Δfst4 | 8-day | 2572586 | down | GO:0005488 | 0,006215447 | binding             |
| Δfst4 | 8-day | 2575853 | down | GO:0005488 | 0,006215447 | binding             |
| Δfst4 | 8-day | 2587289 | down | GO:0005488 | 0,006215447 | binding             |
| Δfst4 | 8-day | 2591516 | down | GO:0005488 | 0,006215447 | binding             |
| Δfst4 | 8-day | 2595361 | down | GO:0005488 | 0,006215447 | binding             |
| Δfst4 | 8-day | 2604699 | down | GO:0005488 | 0,006215447 | binding             |
| Δfst4 | 8-day | 2609281 | down | GO:0005488 | 0,006215447 | binding             |
| Δfst4 | 8-day | 2610587 | down | GO:0005488 | 0,006215447 | binding             |
| Δfst4 | 8-day | 2610599 | down | GO:0005488 | 0,006215447 | binding             |
| Δfst4 | 8-day | 2612591 | down | GO:0005488 | 0,006215447 | binding             |
| Δfst4 | 8-day | 2619248 | down | GO:0005488 | 0,006215447 | binding             |
| Δfst4 | 8-day | 2620649 | down | GO:0005488 | 0,006215447 | binding             |
| Δfst4 | 8-day | 2625782 | down | GO:0005488 | 0,006215447 | binding             |
| Δfst4 | 8-day | 2627113 | down | GO:0005488 | 0,006215447 | binding             |
| Δfst4 | 8-day | 2627883 | down | GO:0005488 | 0,006215447 | binding             |

|       |       |         |      |            |             |                              |
|-------|-------|---------|------|------------|-------------|------------------------------|
| Δfst4 | 8-day | 2629526 | down | GO:0005488 | 0,006215447 | binding                      |
| Δfst4 | 8-day | 2630590 | down | GO:0005488 | 0,006215447 | binding                      |
| Δfst4 | 8-day | 2630802 | down | GO:0005488 | 0,006215447 | binding                      |
| Δfst4 | 8-day | 2631368 | down | GO:0005488 | 0,006215447 | binding                      |
| Δfst4 | 8-day | 2631822 | down | GO:0005488 | 0,006215447 | binding                      |
| Δfst4 | 8-day | 2632611 | down | GO:0005488 | 0,006215447 | binding                      |
| Δfst4 | 8-day | 2633167 | down | GO:0005488 | 0,006215447 | binding                      |
| Δfst4 | 8-day | 2635567 | down | GO:0005488 | 0,006215447 | binding                      |
| Δfst4 | 8-day | 2637104 | down | GO:0005488 | 0,006215447 | binding                      |
| Δfst4 | 8-day | 2637668 | down | GO:0005488 | 0,006215447 | binding                      |
| Δfst4 | 8-day | 2641506 | down | GO:0005488 | 0,006215447 | binding                      |
| Δfst4 | 8-day | 2641520 | down | GO:0005488 | 0,006215447 | binding                      |
| Δfst4 | 8-day | 2661224 | down | GO:0005488 | 0,006215447 | binding                      |
| Δfst4 | 8-day | 2681358 | down | GO:0005488 | 0,006215447 | binding                      |
| Δfst4 | 8-day | 2693285 | down | GO:0005488 | 0,006215447 | binding                      |
| Δfst4 | 8-day | 2749926 | down | GO:0005488 | 0,006215447 | binding                      |
| Δfst4 | 8-day | 2614858 | down | GO:0046914 | 0,006649913 | transition metal ion binding |
| Δfst4 | 8-day | 78628   | down | GO:0004497 | 0,020642556 | monooxygenase activity       |
| Δfst4 | 8-day | 1131542 | down | GO:0004497 | 0,020642556 | monooxygenase activity       |
| Δfst4 | 8-day | 1159597 | down | GO:0004497 | 0,020642556 | monooxygenase activity       |
| Δfst4 | 8-day | 1189794 | down | GO:0004497 | 0,020642556 | monooxygenase activity       |
| Δfst4 | 8-day | 2486680 | down | GO:0004497 | 0,020642556 | monooxygenase activity       |
| Δfst4 | 8-day | 2515850 | down | GO:0004497 | 0,020642556 | monooxygenase activity       |
| Δfst4 | 8-day | 2516208 | down | GO:0004497 | 0,020642556 | monooxygenase activity       |
| Δfst4 | 8-day | 2534187 | down | GO:0004497 | 0,020642556 | monooxygenase activity       |
| Δfst4 | 8-day | 2559987 | down | GO:0004497 | 0,020642556 | monooxygenase activity       |
| Δfst4 | 8-day | 2594763 | down | GO:0004497 | 0,020642556 | monooxygenase activity       |
| Δfst4 | 8-day | 2604735 | down | GO:0004497 | 0,020642556 | monooxygenase activity       |
| Δfst4 | 8-day | 2614692 | down | GO:0004497 | 0,020642556 | monooxygenase activity       |
| Δfst4 | 8-day | 2616590 | down | GO:0004497 | 0,020642556 | monooxygenase activity       |
| Δfst4 | 8-day | 2619674 | down | GO:0004497 | 0,020642556 | monooxygenase activity       |
| Δfst4 | 8-day | 2628312 | down | GO:0004497 | 0,020642556 | monooxygenase activity       |
| Δfst4 | 8-day | 2628651 | down | GO:0004497 | 0,020642556 | monooxygenase activity       |
| Δfst4 | 8-day | 2634186 | down | GO:0004497 | 0,020642556 | monooxygenase activity       |

|               |       |         |      |            |             |                                      |
|---------------|-------|---------|------|------------|-------------|--------------------------------------|
| $\Delta$ fst4 | 8-day | 2635487 | down | GO:0004497 | 0,020642556 | monooxygenase activity               |
| $\Delta$ fst4 | 8-day | 2638355 | down | GO:0004497 | 0,020642556 | monooxygenase activity               |
| $\Delta$ fst4 | 8-day | 2671785 | down | GO:0004497 | 0,020642556 | monooxygenase activity               |
| $\Delta$ fst4 | 8-day | 2703965 | down | GO:0004497 | 0,020642556 | monooxygenase activity               |
| $\Delta$ fst4 | 8-day | 2703966 | down | GO:0004497 | 0,020642556 | monooxygenase activity               |
| $\Delta$ fst4 | 8-day | 2705258 | down | GO:0004497 | 0,020642556 | monooxygenase activity               |
| $\Delta$ fst4 | 8-day | 2493870 | down | GO:0008026 | 0,024148563 | ATP-dependent helicase activity      |
| $\Delta$ fst4 | 8-day | 2677580 | down | GO:0008026 | 0,024148563 | ATP-dependent helicase activity      |
| $\Delta$ fst4 | 8-day | 2512030 | down | GO:0009058 | 0,024744166 | biosynthetic process                 |
| $\Delta$ fst4 | 8-day | 2512873 | down | GO:0009058 | 0,024744166 | biosynthetic process                 |
| $\Delta$ fst4 | 8-day | 2623956 | down | GO:0009058 | 0,024744166 | biosynthetic process                 |
| $\Delta$ fst4 | 8-day | 2632714 | down | GO:0009058 | 0,024744166 | biosynthetic process                 |
| $\Delta$ fst4 | 8-day | 2616602 | down | GO:0005388 | 0,033524109 | calcium-transporting ATPase activity |
| $\Delta$ fst4 | 8-day | 2534187 | down | GO:0006520 | 0,033524109 | amino acid metabolic process         |
| $\Delta$ gat1 | 8-day | 2629603 | up   | GO:0005199 | 6,29E-09    | structural constituent of cell wall  |
| $\Delta$ gat1 | 8-day | 2614257 | up   | GO:0005618 | 7,44E-09    | cell wall                            |
| $\Delta$ gat1 | 8-day | 2629603 | up   | GO:0005618 | 7,44E-09    | cell wall                            |
| $\Delta$ gat1 | 8-day | 78628   | up   | GO:0004497 | 9,04E-05    | monooxygenase activity               |
| $\Delta$ gat1 | 8-day | 81631   | up   | GO:0004497 | 9,04E-05    | monooxygenase activity               |
| $\Delta$ gat1 | 8-day | 1139445 | up   | GO:0004497 | 9,04E-05    | monooxygenase activity               |
| $\Delta$ gat1 | 8-day | 1189794 | up   | GO:0004497 | 9,04E-05    | monooxygenase activity               |
| $\Delta$ gat1 | 8-day | 2510618 | up   | GO:0004497 | 9,04E-05    | monooxygenase activity               |
| $\Delta$ gat1 | 8-day | 2516208 | up   | GO:0004497 | 9,04E-05    | monooxygenase activity               |
| $\Delta$ gat1 | 8-day | 2604096 | up   | GO:0004497 | 9,04E-05    | monooxygenase activity               |
| $\Delta$ gat1 | 8-day | 2604458 | up   | GO:0004497 | 9,04E-05    | monooxygenase activity               |
| $\Delta$ gat1 | 8-day | 2604735 | up   | GO:0004497 | 9,04E-05    | monooxygenase activity               |
| $\Delta$ gat1 | 8-day | 2611234 | up   | GO:0004497 | 9,04E-05    | monooxygenase activity               |
| $\Delta$ gat1 | 8-day | 2616301 | up   | GO:0004497 | 9,04E-05    | monooxygenase activity               |
| $\Delta$ gat1 | 8-day | 2619840 | up   | GO:0004497 | 9,04E-05    | monooxygenase activity               |
| $\Delta$ gat1 | 8-day | 2623115 | up   | GO:0004497 | 9,04E-05    | monooxygenase activity               |
| $\Delta$ gat1 | 8-day | 2623122 | up   | GO:0004497 | 9,04E-05    | monooxygenase activity               |
| $\Delta$ gat1 | 8-day | 2628651 | up   | GO:0004497 | 9,04E-05    | monooxygenase activity               |
| $\Delta$ gat1 | 8-day | 2635487 | up   | GO:0004497 | 9,04E-05    | monooxygenase activity               |
| $\Delta$ gat1 | 8-day | 2636544 | up   | GO:0004497 | 9,04E-05    | monooxygenase activity               |

|               |       |         |    |            |             |                        |
|---------------|-------|---------|----|------------|-------------|------------------------|
| $\Delta$ gat1 | 8-day | 2644430 | up | GO:0004497 | 9,04E-05    | monooxygenase activity |
| $\Delta$ gat1 | 8-day | 2703628 | up | GO:0004497 | 9,04E-05    | monooxygenase activity |
| $\Delta$ gat1 | 8-day | 2703966 | up | GO:0004497 | 9,04E-05    | monooxygenase activity |
| $\Delta$ gat1 | 8-day | 2735179 | up | GO:0004497 | 9,04E-05    | monooxygenase activity |
| $\Delta$ gat1 | 8-day | 1131965 | up | GO:0008152 | 0,000350754 | metabolic process      |
| $\Delta$ gat1 | 8-day | 1156481 | up | GO:0008152 | 0,000350754 | metabolic process      |
| $\Delta$ gat1 | 8-day | 1193333 | up | GO:0008152 | 0,000350754 | metabolic process      |
| $\Delta$ gat1 | 8-day | 2135332 | up | GO:0008152 | 0,000350754 | metabolic process      |
| $\Delta$ gat1 | 8-day | 2255031 | up | GO:0008152 | 0,000350754 | metabolic process      |
| $\Delta$ gat1 | 8-day | 2333133 | up | GO:0008152 | 0,000350754 | metabolic process      |
| $\Delta$ gat1 | 8-day | 2373661 | up | GO:0008152 | 0,000350754 | metabolic process      |
| $\Delta$ gat1 | 8-day | 2577440 | up | GO:0008152 | 0,000350754 | metabolic process      |
| $\Delta$ gat1 | 8-day | 2587289 | up | GO:0008152 | 0,000350754 | metabolic process      |
| $\Delta$ gat1 | 8-day | 2609150 | up | GO:0008152 | 0,000350754 | metabolic process      |
| $\Delta$ gat1 | 8-day | 2610599 | up | GO:0008152 | 0,000350754 | metabolic process      |
| $\Delta$ gat1 | 8-day | 2612018 | up | GO:0008152 | 0,000350754 | metabolic process      |
| $\Delta$ gat1 | 8-day | 2615598 | up | GO:0008152 | 0,000350754 | metabolic process      |
| $\Delta$ gat1 | 8-day | 2616916 | up | GO:0008152 | 0,000350754 | metabolic process      |
| $\Delta$ gat1 | 8-day | 2619840 | up | GO:0008152 | 0,000350754 | metabolic process      |
| $\Delta$ gat1 | 8-day | 2621873 | up | GO:0008152 | 0,000350754 | metabolic process      |
| $\Delta$ gat1 | 8-day | 2624073 | up | GO:0008152 | 0,000350754 | metabolic process      |
| $\Delta$ gat1 | 8-day | 2624525 | up | GO:0008152 | 0,000350754 | metabolic process      |
| $\Delta$ gat1 | 8-day | 2625782 | up | GO:0008152 | 0,000350754 | metabolic process      |
| $\Delta$ gat1 | 8-day | 2626510 | up | GO:0008152 | 0,000350754 | metabolic process      |
| $\Delta$ gat1 | 8-day | 2627257 | up | GO:0008152 | 0,000350754 | metabolic process      |
| $\Delta$ gat1 | 8-day | 2629548 | up | GO:0008152 | 0,000350754 | metabolic process      |
| $\Delta$ gat1 | 8-day | 2630599 | up | GO:0008152 | 0,000350754 | metabolic process      |
| $\Delta$ gat1 | 8-day | 2632206 | up | GO:0008152 | 0,000350754 | metabolic process      |
| $\Delta$ gat1 | 8-day | 2632611 | up | GO:0008152 | 0,000350754 | metabolic process      |
| $\Delta$ gat1 | 8-day | 2633266 | up | GO:0008152 | 0,000350754 | metabolic process      |
| $\Delta$ gat1 | 8-day | 2633632 | up | GO:0008152 | 0,000350754 | metabolic process      |
| $\Delta$ gat1 | 8-day | 2634450 | up | GO:0008152 | 0,000350754 | metabolic process      |
| $\Delta$ gat1 | 8-day | 2634903 | up | GO:0008152 | 0,000350754 | metabolic process      |
| $\Delta$ gat1 | 8-day | 2637104 | up | GO:0008152 | 0,000350754 | metabolic process      |



|               |       |         |    |            |             |                         |
|---------------|-------|---------|----|------------|-------------|-------------------------|
| $\Delta$ gat1 | 8-day | 2637643 | up | GO:0008152 | 0,000350754 | metabolic process       |
| $\Delta$ gat1 | 8-day | 2637755 | up | GO:0008152 | 0,000350754 | metabolic process       |
| $\Delta$ gat1 | 8-day | 2638484 | up | GO:0008152 | 0,000350754 | metabolic process       |
| $\Delta$ gat1 | 8-day | 2640472 | up | GO:0008152 | 0,000350754 | metabolic process       |
| $\Delta$ gat1 | 8-day | 2640484 | up | GO:0008152 | 0,000350754 | metabolic process       |
| $\Delta$ gat1 | 8-day | 2641506 | up | GO:0008152 | 0,000350754 | metabolic process       |
| $\Delta$ gat1 | 8-day | 2641520 | up | GO:0008152 | 0,000350754 | metabolic process       |
| $\Delta$ gat1 | 8-day | 2644127 | up | GO:0008152 | 0,000350754 | metabolic process       |
| $\Delta$ gat1 | 8-day | 2644330 | up | GO:0008152 | 0,000350754 | metabolic process       |
| $\Delta$ gat1 | 8-day | 2644430 | up | GO:0008152 | 0,000350754 | metabolic process       |
| $\Delta$ gat1 | 8-day | 2705421 | up | GO:0008152 | 0,000350754 | metabolic process       |
| $\Delta$ gat1 | 8-day | 257768  | up | GO:0016491 | 0,000363678 | oxidoreductase activity |
| $\Delta$ gat1 | 8-day | 1131965 | up | GO:0016491 | 0,000363678 | oxidoreductase activity |
| $\Delta$ gat1 | 8-day | 1156481 | up | GO:0016491 | 0,000363678 | oxidoreductase activity |
| $\Delta$ gat1 | 8-day | 2255031 | up | GO:0016491 | 0,000363678 | oxidoreductase activity |
| $\Delta$ gat1 | 8-day | 2312801 | up | GO:0016491 | 0,000363678 | oxidoreductase activity |
| $\Delta$ gat1 | 8-day | 2333133 | up | GO:0016491 | 0,000363678 | oxidoreductase activity |
| $\Delta$ gat1 | 8-day | 2376858 | up | GO:0016491 | 0,000363678 | oxidoreductase activity |
| $\Delta$ gat1 | 8-day | 2498556 | up | GO:0016491 | 0,000363678 | oxidoreductase activity |
| $\Delta$ gat1 | 8-day | 2503108 | up | GO:0016491 | 0,000363678 | oxidoreductase activity |
| $\Delta$ gat1 | 8-day | 2587289 | up | GO:0016491 | 0,000363678 | oxidoreductase activity |
| $\Delta$ gat1 | 8-day | 2604174 | up | GO:0016491 | 0,000363678 | oxidoreductase activity |
| $\Delta$ gat1 | 8-day | 2609840 | up | GO:0016491 | 0,000363678 | oxidoreductase activity |
| $\Delta$ gat1 | 8-day | 2610599 | up | GO:0016491 | 0,000363678 | oxidoreductase activity |
| $\Delta$ gat1 | 8-day | 2616916 | up | GO:0016491 | 0,000363678 | oxidoreductase activity |
| $\Delta$ gat1 | 8-day | 2617060 | up | GO:0016491 | 0,000363678 | oxidoreductase activity |
| $\Delta$ gat1 | 8-day | 2619840 | up | GO:0016491 | 0,000363678 | oxidoreductase activity |
| $\Delta$ gat1 | 8-day | 2621873 | up | GO:0016491 | 0,000363678 | oxidoreductase activity |
| $\Delta$ gat1 | 8-day | 2624073 | up | GO:0016491 | 0,000363678 | oxidoreductase activity |
| $\Delta$ gat1 | 8-day | 2624407 | up | GO:0016491 | 0,000363678 | oxidoreductase activity |
| $\Delta$ gat1 | 8-day | 2630599 | up | GO:0016491 | 0,000363678 | oxidoreductase activity |
| $\Delta$ gat1 | 8-day | 2633266 | up | GO:0016491 | 0,000363678 | oxidoreductase activity |
| $\Delta$ gat1 | 8-day | 2633632 | up | GO:0016491 | 0,000363678 | oxidoreductase activity |
| $\Delta$ gat1 | 8-day | 2634450 | up | GO:0016491 | 0,000363678 | oxidoreductase activity |

|               |       |         |    |            |             |                         |
|---------------|-------|---------|----|------------|-------------|-------------------------|
| $\Delta$ gat1 | 8-day | 2634903 | up | GO:0016491 | 0,000363678 | oxidoreductase activity |
| $\Delta$ gat1 | 8-day | 2637104 | up | GO:0016491 | 0,000363678 | oxidoreductase activity |
| $\Delta$ gat1 | 8-day | 2637755 | up | GO:0016491 | 0,000363678 | oxidoreductase activity |
| $\Delta$ gat1 | 8-day | 2638484 | up | GO:0016491 | 0,000363678 | oxidoreductase activity |
| $\Delta$ gat1 | 8-day | 2639682 | up | GO:0016491 | 0,000363678 | oxidoreductase activity |
| $\Delta$ gat1 | 8-day | 2641506 | up | GO:0016491 | 0,000363678 | oxidoreductase activity |
| $\Delta$ gat1 | 8-day | 2641520 | up | GO:0016491 | 0,000363678 | oxidoreductase activity |
| $\Delta$ gat1 | 8-day | 2644127 | up | GO:0016491 | 0,000363678 | oxidoreductase activity |
| $\Delta$ gat1 | 8-day | 2644330 | up | GO:0016491 | 0,000363678 | oxidoreductase activity |
| $\Delta$ gat1 | 8-day | 2644430 | up | GO:0016491 | 0,000363678 | oxidoreductase activity |
| $\Delta$ gat1 | 8-day | 2688172 | up | GO:0016491 | 0,000363678 | oxidoreductase activity |
| $\Delta$ gat1 | 8-day | 2705421 | up | GO:0016491 | 0,000363678 | oxidoreductase activity |
| $\Delta$ gat1 | 8-day | 78628   | up | GO:0020037 | 0,000562173 | heme binding            |
| $\Delta$ gat1 | 8-day | 81631   | up | GO:0020037 | 0,000562173 | heme binding            |
| $\Delta$ gat1 | 8-day | 1139445 | up | GO:0020037 | 0,000562173 | heme binding            |
| $\Delta$ gat1 | 8-day | 1189794 | up | GO:0020037 | 0,000562173 | heme binding            |
| $\Delta$ gat1 | 8-day | 2376858 | up | GO:0020037 | 0,000562173 | heme binding            |
| $\Delta$ gat1 | 8-day | 2510618 | up | GO:0020037 | 0,000562173 | heme binding            |
| $\Delta$ gat1 | 8-day | 2516208 | up | GO:0020037 | 0,000562173 | heme binding            |
| $\Delta$ gat1 | 8-day | 2604096 | up | GO:0020037 | 0,000562173 | heme binding            |
| $\Delta$ gat1 | 8-day | 2604458 | up | GO:0020037 | 0,000562173 | heme binding            |
| $\Delta$ gat1 | 8-day | 2604628 | up | GO:0020037 | 0,000562173 | heme binding            |
| $\Delta$ gat1 | 8-day | 2604735 | up | GO:0020037 | 0,000562173 | heme binding            |
| $\Delta$ gat1 | 8-day | 2609840 | up | GO:0020037 | 0,000562173 | heme binding            |
| $\Delta$ gat1 | 8-day | 2611234 | up | GO:0020037 | 0,000562173 | heme binding            |
| $\Delta$ gat1 | 8-day | 2614998 | up | GO:0020037 | 0,000562173 | heme binding            |
| $\Delta$ gat1 | 8-day | 2616301 | up | GO:0020037 | 0,000562173 | heme binding            |
| $\Delta$ gat1 | 8-day | 2621855 | up | GO:0020037 | 0,000562173 | heme binding            |
| $\Delta$ gat1 | 8-day | 2623115 | up | GO:0020037 | 0,000562173 | heme binding            |
| $\Delta$ gat1 | 8-day | 2623122 | up | GO:0020037 | 0,000562173 | heme binding            |
| $\Delta$ gat1 | 8-day | 2628651 | up | GO:0020037 | 0,000562173 | heme binding            |
| $\Delta$ gat1 | 8-day | 2635487 | up | GO:0020037 | 0,000562173 | heme binding            |
| $\Delta$ gat1 | 8-day | 2636544 | up | GO:0020037 | 0,000562173 | heme binding            |
| $\Delta$ gat1 | 8-day | 2703628 | up | GO:0020037 | 0,000562173 | heme binding            |

|               |       |         |    |            |             |                                                          |
|---------------|-------|---------|----|------------|-------------|----------------------------------------------------------|
| $\Delta$ gat1 | 8-day | 2703966 | up | GO:0020037 | 0,000562173 | heme binding                                             |
| $\Delta$ gat1 | 8-day | 2735179 | up | GO:0020037 | 0,000562173 | heme binding                                             |
| $\Delta$ gat1 | 8-day | 257768  | up | GO:0050660 | 0,00157944  | FAD binding                                              |
| $\Delta$ gat1 | 8-day | 2503108 | up | GO:0050660 | 0,00157944  | FAD binding                                              |
| $\Delta$ gat1 | 8-day | 2607677 | up | GO:0050660 | 0,00157944  | FAD binding                                              |
| $\Delta$ gat1 | 8-day | 2610771 | up | GO:0050660 | 0,00157944  | FAD binding                                              |
| $\Delta$ gat1 | 8-day | 2642607 | up | GO:0050660 | 0,00157944  | FAD binding                                              |
| $\Delta$ gat1 | 8-day | 2688172 | up | GO:0050660 | 0,00157944  | FAD binding                                              |
| $\Delta$ gat1 | 8-day | 2607677 | up | GO:0016614 | 0,004880619 | oxidoreductase activity, acting on CH-OH group of donors |
| $\Delta$ gat1 | 8-day | 2610771 | up | GO:0016614 | 0,004880619 | oxidoreductase activity, acting on CH-OH group of donors |
| $\Delta$ gat1 | 8-day | 2642607 | up | GO:0016614 | 0,004880619 | oxidoreductase activity, acting on CH-OH group of donors |
| $\Delta$ gat1 | 8-day | 78628   | up | GO:0006118 | 0,005273466 | electron transport                                       |
| $\Delta$ gat1 | 8-day | 81631   | up | GO:0006118 | 0,005273466 | electron transport                                       |
| $\Delta$ gat1 | 8-day | 257768  | up | GO:0006118 | 0,005273466 | electron transport                                       |
| $\Delta$ gat1 | 8-day | 1139445 | up | GO:0006118 | 0,005273466 | electron transport                                       |
| $\Delta$ gat1 | 8-day | 1189794 | up | GO:0006118 | 0,005273466 | electron transport                                       |
| $\Delta$ gat1 | 8-day | 2498556 | up | GO:0006118 | 0,005273466 | electron transport                                       |
| $\Delta$ gat1 | 8-day | 2503108 | up | GO:0006118 | 0,005273466 | electron transport                                       |
| $\Delta$ gat1 | 8-day | 2510618 | up | GO:0006118 | 0,005273466 | electron transport                                       |
| $\Delta$ gat1 | 8-day | 2516208 | up | GO:0006118 | 0,005273466 | electron transport                                       |
| $\Delta$ gat1 | 8-day | 2604096 | up | GO:0006118 | 0,005273466 | electron transport                                       |
| $\Delta$ gat1 | 8-day | 2604458 | up | GO:0006118 | 0,005273466 | electron transport                                       |
| $\Delta$ gat1 | 8-day | 2604628 | up | GO:0006118 | 0,005273466 | electron transport                                       |
| $\Delta$ gat1 | 8-day | 2604735 | up | GO:0006118 | 0,005273466 | electron transport                                       |
| $\Delta$ gat1 | 8-day | 2609831 | up | GO:0006118 | 0,005273466 | electron transport                                       |
| $\Delta$ gat1 | 8-day | 2609840 | up | GO:0006118 | 0,005273466 | electron transport                                       |
| $\Delta$ gat1 | 8-day | 2611234 | up | GO:0006118 | 0,005273466 | electron transport                                       |
| $\Delta$ gat1 | 8-day | 2614998 | up | GO:0006118 | 0,005273466 | electron transport                                       |
| $\Delta$ gat1 | 8-day | 2616301 | up | GO:0006118 | 0,005273466 | electron transport                                       |
| $\Delta$ gat1 | 8-day | 2619840 | up | GO:0006118 | 0,005273466 | electron transport                                       |
| $\Delta$ gat1 | 8-day | 2620726 | up | GO:0006118 | 0,005273466 | electron transport                                       |
| $\Delta$ gat1 | 8-day | 2621855 | up | GO:0006118 | 0,005273466 | electron transport                                       |
| $\Delta$ gat1 | 8-day | 2623115 | up | GO:0006118 | 0,005273466 | electron transport                                       |
| $\Delta$ gat1 | 8-day | 2623122 | up | GO:0006118 | 0,005273466 | electron transport                                       |

|       |       |         |    |            |             |                                   |
|-------|-------|---------|----|------------|-------------|-----------------------------------|
| Δgat1 | 8-day | 2628651 | up | GO:0006118 | 0,005273466 | electron transport                |
| Δgat1 | 8-day | 2635487 | up | GO:0006118 | 0,005273466 | electron transport                |
| Δgat1 | 8-day | 2636544 | up | GO:0006118 | 0,005273466 | electron transport                |
| Δgat1 | 8-day | 2637104 | up | GO:0006118 | 0,005273466 | electron transport                |
| Δgat1 | 8-day | 2639682 | up | GO:0006118 | 0,005273466 | electron transport                |
| Δgat1 | 8-day | 2644430 | up | GO:0006118 | 0,005273466 | electron transport                |
| Δgat1 | 8-day | 2662585 | up | GO:0006118 | 0,005273466 | electron transport                |
| Δgat1 | 8-day | 2703628 | up | GO:0006118 | 0,005273466 | electron transport                |
| Δgat1 | 8-day | 2703966 | up | GO:0006118 | 0,005273466 | electron transport                |
| Δgat1 | 8-day | 2735179 | up | GO:0006118 | 0,005273466 | electron transport                |
| Δgat1 | 8-day | 2609831 | up | GO:0005507 | 0,006102775 | copper ion binding                |
| Δgat1 | 8-day | 78628   | up | GO:0050381 | 0,010486262 | unspecific monooxygenase activity |
| Δgat1 | 8-day | 81631   | up | GO:0050381 | 0,010486262 | unspecific monooxygenase activity |
| Δgat1 | 8-day | 1139445 | up | GO:0050381 | 0,010486262 | unspecific monooxygenase activity |
| Δgat1 | 8-day | 2510618 | up | GO:0050381 | 0,010486262 | unspecific monooxygenase activity |
| Δgat1 | 8-day | 2604458 | up | GO:0050381 | 0,010486262 | unspecific monooxygenase activity |
| Δgat1 | 8-day | 2628651 | up | GO:0050381 | 0,010486262 | unspecific monooxygenase activity |
| Δgat1 | 8-day | 2636544 | up | GO:0050381 | 0,010486262 | unspecific monooxygenase activity |
| Δgat1 | 8-day | 2703628 | up | GO:0050381 | 0,010486262 | unspecific monooxygenase activity |
| Δgat1 | 8-day | 2703966 | up | GO:0050381 | 0,010486262 | unspecific monooxygenase activity |
| Δgat1 | 8-day | 2735179 | up | GO:0050381 | 0,010486262 | unspecific monooxygenase activity |
| Δgat1 | 8-day | 78628   | up | GO:0005506 | 0,024343875 | iron ion binding                  |
| Δgat1 | 8-day | 81631   | up | GO:0005506 | 0,024343875 | iron ion binding                  |
| Δgat1 | 8-day | 1139445 | up | GO:0005506 | 0,024343875 | iron ion binding                  |
| Δgat1 | 8-day | 1189794 | up | GO:0005506 | 0,024343875 | iron ion binding                  |
| Δgat1 | 8-day | 2312801 | up | GO:0005506 | 0,024343875 | iron ion binding                  |
| Δgat1 | 8-day | 2376858 | up | GO:0005506 | 0,024343875 | iron ion binding                  |
| Δgat1 | 8-day | 2503108 | up | GO:0005506 | 0,024343875 | iron ion binding                  |
| Δgat1 | 8-day | 2510618 | up | GO:0005506 | 0,024343875 | iron ion binding                  |
| Δgat1 | 8-day | 2516208 | up | GO:0005506 | 0,024343875 | iron ion binding                  |
| Δgat1 | 8-day | 2604096 | up | GO:0005506 | 0,024343875 | iron ion binding                  |
| Δgat1 | 8-day | 2604458 | up | GO:0005506 | 0,024343875 | iron ion binding                  |
| Δgat1 | 8-day | 2604628 | up | GO:0005506 | 0,024343875 | iron ion binding                  |
| Δgat1 | 8-day | 2604735 | up | GO:0005506 | 0,024343875 | iron ion binding                  |

|       |       |         |      |            |             |                                     |
|-------|-------|---------|------|------------|-------------|-------------------------------------|
| Δgat1 | 8-day | 2611234 | up   | GO:0005506 | 0,024343875 | iron ion binding                    |
| Δgat1 | 8-day | 2616301 | up   | GO:0005506 | 0,024343875 | iron ion binding                    |
| Δgat1 | 8-day | 2617060 | up   | GO:0005506 | 0,024343875 | iron ion binding                    |
| Δgat1 | 8-day | 2621855 | up   | GO:0005506 | 0,024343875 | iron ion binding                    |
| Δgat1 | 8-day | 2623115 | up   | GO:0005506 | 0,024343875 | iron ion binding                    |
| Δgat1 | 8-day | 2623122 | up   | GO:0005506 | 0,024343875 | iron ion binding                    |
| Δgat1 | 8-day | 2628651 | up   | GO:0005506 | 0,024343875 | iron ion binding                    |
| Δgat1 | 8-day | 2635487 | up   | GO:0005506 | 0,024343875 | iron ion binding                    |
| Δgat1 | 8-day | 2636544 | up   | GO:0005506 | 0,024343875 | iron ion binding                    |
| Δgat1 | 8-day | 2703628 | up   | GO:0005506 | 0,024343875 | iron ion binding                    |
| Δgat1 | 8-day | 2703966 | up   | GO:0005506 | 0,024343875 | iron ion binding                    |
| Δgat1 | 8-day | 2735179 | up   | GO:0005506 | 0,024343875 | iron ion binding                    |
| Δgat1 | 8-day | 2577440 | up   | GO:0000162 | 0,035771354 | tryptophan biosynthetic process     |
| Δgat1 | 8-day | 2619840 | up   | GO:0006725 | 0,035771354 | aromatic compound metabolic process |
| Δgat1 | 8-day | 2644430 | up   | GO:0006725 | 0,035771354 | aromatic compound metabolic process |
| Δgat1 | 8-day | 1087819 | down | GO:0005975 | 8,18E-09    | carbohydrate metabolic process      |
| Δgat1 | 8-day | 2514546 | down | GO:0005975 | 8,18E-09    | carbohydrate metabolic process      |
| Δgat1 | 8-day | 2613657 | down | GO:0005975 | 8,18E-09    | carbohydrate metabolic process      |
| Δgat1 | 8-day | 2626756 | down | GO:0005975 | 8,18E-09    | carbohydrate metabolic process      |
| Δgat1 | 8-day | 2636145 | down | GO:0005975 | 8,18E-09    | carbohydrate metabolic process      |
| Δgat1 | 8-day | 2641020 | down | GO:0005975 | 8,18E-09    | carbohydrate metabolic process      |
| Δgat1 | 8-day | 2670422 | down | GO:0005975 | 8,18E-09    | carbohydrate metabolic process      |
| Δgat1 | 8-day | 1083109 | down | GO:0005506 | 1,22E-07    | iron ion binding                    |
| Δgat1 | 8-day | 1120318 | down | GO:0005506 | 1,22E-07    | iron ion binding                    |
| Δgat1 | 8-day | 1358353 | down | GO:0005506 | 1,22E-07    | iron ion binding                    |
| Δgat1 | 8-day | 2364606 | down | GO:0005506 | 1,22E-07    | iron ion binding                    |
| Δgat1 | 8-day | 2491624 | down | GO:0005506 | 1,22E-07    | iron ion binding                    |
| Δgat1 | 8-day | 2501258 | down | GO:0005506 | 1,22E-07    | iron ion binding                    |
| Δgat1 | 8-day | 2514636 | down | GO:0005506 | 1,22E-07    | iron ion binding                    |
| Δgat1 | 8-day | 2537529 | down | GO:0005506 | 1,22E-07    | iron ion binding                    |
| Δgat1 | 8-day | 2559987 | down | GO:0005506 | 1,22E-07    | iron ion binding                    |
| Δgat1 | 8-day | 2619716 | down | GO:0005506 | 1,22E-07    | iron ion binding                    |
| Δgat1 | 8-day | 2622782 | down | GO:0005506 | 1,22E-07    | iron ion binding                    |
| Δgat1 | 8-day | 2624973 | down | GO:0005506 | 1,22E-07    | iron ion binding                    |

|               |       |         |      |            |          |                    |
|---------------|-------|---------|------|------------|----------|--------------------|
| $\Delta$ gat1 | 8-day | 2635870 | down | GO:0005506 | 1,22E-07 | iron ion binding   |
| $\Delta$ gat1 | 8-day | 2637467 | down | GO:0005506 | 1,22E-07 | iron ion binding   |
| $\Delta$ gat1 | 8-day | 1083109 | down | GO:0020037 | 1,67E-06 | heme binding       |
| $\Delta$ gat1 | 8-day | 1120318 | down | GO:0020037 | 1,67E-06 | heme binding       |
| $\Delta$ gat1 | 8-day | 1358353 | down | GO:0020037 | 1,67E-06 | heme binding       |
| $\Delta$ gat1 | 8-day | 2364606 | down | GO:0020037 | 1,67E-06 | heme binding       |
| $\Delta$ gat1 | 8-day | 2491624 | down | GO:0020037 | 1,67E-06 | heme binding       |
| $\Delta$ gat1 | 8-day | 2501258 | down | GO:0020037 | 1,67E-06 | heme binding       |
| $\Delta$ gat1 | 8-day | 2514636 | down | GO:0020037 | 1,67E-06 | heme binding       |
| $\Delta$ gat1 | 8-day | 2537529 | down | GO:0020037 | 1,67E-06 | heme binding       |
| $\Delta$ gat1 | 8-day | 2559987 | down | GO:0020037 | 1,67E-06 | heme binding       |
| $\Delta$ gat1 | 8-day | 2608091 | down | GO:0020037 | 1,67E-06 | heme binding       |
| $\Delta$ gat1 | 8-day | 2619716 | down | GO:0020037 | 1,67E-06 | heme binding       |
| $\Delta$ gat1 | 8-day | 2622782 | down | GO:0020037 | 1,67E-06 | heme binding       |
| $\Delta$ gat1 | 8-day | 2622893 | down | GO:0020037 | 1,67E-06 | heme binding       |
| $\Delta$ gat1 | 8-day | 2624973 | down | GO:0020037 | 1,67E-06 | heme binding       |
| $\Delta$ gat1 | 8-day | 2635870 | down | GO:0020037 | 1,67E-06 | heme binding       |
| $\Delta$ gat1 | 8-day | 2637467 | down | GO:0020037 | 1,67E-06 | heme binding       |
| $\Delta$ gat1 | 8-day | 2640585 | down | GO:0020037 | 1,67E-06 | heme binding       |
| $\Delta$ gat1 | 8-day | 2673121 | down | GO:0020037 | 1,67E-06 | heme binding       |
| $\Delta$ gat1 | 8-day | 1120318 | down | GO:0006118 | 1,85E-06 | electron transport |
| $\Delta$ gat1 | 8-day | 1342670 | down | GO:0006118 | 1,85E-06 | electron transport |
| $\Delta$ gat1 | 8-day | 1358353 | down | GO:0006118 | 1,85E-06 | electron transport |
| $\Delta$ gat1 | 8-day | 2364606 | down | GO:0006118 | 1,85E-06 | electron transport |
| $\Delta$ gat1 | 8-day | 2490194 | down | GO:0006118 | 1,85E-06 | electron transport |
| $\Delta$ gat1 | 8-day | 2491624 | down | GO:0006118 | 1,85E-06 | electron transport |
| $\Delta$ gat1 | 8-day | 2501258 | down | GO:0006118 | 1,85E-06 | electron transport |
| $\Delta$ gat1 | 8-day | 2508276 | down | GO:0006118 | 1,85E-06 | electron transport |
| $\Delta$ gat1 | 8-day | 2514636 | down | GO:0006118 | 1,85E-06 | electron transport |
| $\Delta$ gat1 | 8-day | 2537529 | down | GO:0006118 | 1,85E-06 | electron transport |
| $\Delta$ gat1 | 8-day | 2559987 | down | GO:0006118 | 1,85E-06 | electron transport |
| $\Delta$ gat1 | 8-day | 2573393 | down | GO:0006118 | 1,85E-06 | electron transport |
| $\Delta$ gat1 | 8-day | 2573396 | down | GO:0006118 | 1,85E-06 | electron transport |
| $\Delta$ gat1 | 8-day | 2605889 | down | GO:0006118 | 1,85E-06 | electron transport |

|       |       |         |      |            |             |                        |
|-------|-------|---------|------|------------|-------------|------------------------|
| Δgat1 | 8-day | 2619716 | down | GO:0006118 | 1,85E-06    | electron transport     |
| Δgat1 | 8-day | 2622782 | down | GO:0006118 | 1,85E-06    | electron transport     |
| Δgat1 | 8-day | 2624973 | down | GO:0006118 | 1,85E-06    | electron transport     |
| Δgat1 | 8-day | 2628120 | down | GO:0006118 | 1,85E-06    | electron transport     |
| Δgat1 | 8-day | 2635870 | down | GO:0006118 | 1,85E-06    | electron transport     |
| Δgat1 | 8-day | 2637467 | down | GO:0006118 | 1,85E-06    | electron transport     |
| Δgat1 | 8-day | 2638473 | down | GO:0006118 | 1,85E-06    | electron transport     |
| Δgat1 | 8-day | 2666009 | down | GO:0006118 | 1,85E-06    | electron transport     |
| Δgat1 | 8-day | 2703927 | down | GO:0006118 | 1,85E-06    | electron transport     |
| Δgat1 | 8-day | 1120318 | down | GO:0004497 | 4,91E-06    | monooxygenase activity |
| Δgat1 | 8-day | 1342670 | down | GO:0004497 | 4,91E-06    | monooxygenase activity |
| Δgat1 | 8-day | 1358353 | down | GO:0004497 | 4,91E-06    | monooxygenase activity |
| Δgat1 | 8-day | 2364606 | down | GO:0004497 | 4,91E-06    | monooxygenase activity |
| Δgat1 | 8-day | 2490194 | down | GO:0004497 | 4,91E-06    | monooxygenase activity |
| Δgat1 | 8-day | 2491624 | down | GO:0004497 | 4,91E-06    | monooxygenase activity |
| Δgat1 | 8-day | 2501258 | down | GO:0004497 | 4,91E-06    | monooxygenase activity |
| Δgat1 | 8-day | 2514636 | down | GO:0004497 | 4,91E-06    | monooxygenase activity |
| Δgat1 | 8-day | 2537529 | down | GO:0004497 | 4,91E-06    | monooxygenase activity |
| Δgat1 | 8-day | 2559987 | down | GO:0004497 | 4,91E-06    | monooxygenase activity |
| Δgat1 | 8-day | 2573393 | down | GO:0004497 | 4,91E-06    | monooxygenase activity |
| Δgat1 | 8-day | 2573396 | down | GO:0004497 | 4,91E-06    | monooxygenase activity |
| Δgat1 | 8-day | 2619716 | down | GO:0004497 | 4,91E-06    | monooxygenase activity |
| Δgat1 | 8-day | 2622782 | down | GO:0004497 | 4,91E-06    | monooxygenase activity |
| Δgat1 | 8-day | 2624973 | down | GO:0004497 | 4,91E-06    | monooxygenase activity |
| Δgat1 | 8-day | 2635870 | down | GO:0004497 | 4,91E-06    | monooxygenase activity |
| Δgat1 | 8-day | 2637467 | down | GO:0004497 | 4,91E-06    | monooxygenase activity |
| Δgat1 | 8-day | 2703927 | down | GO:0004497 | 4,91E-06    | monooxygenase activity |
| Δgat1 | 8-day | 1158800 | down | GO:0005524 | 0,000112675 | ATP binding            |
| Δgat1 | 8-day | 1172108 | down | GO:0005524 | 0,000112675 | ATP binding            |
| Δgat1 | 8-day | 1181112 | down | GO:0005524 | 0,000112675 | ATP binding            |
| Δgat1 | 8-day | 2484205 | down | GO:0005524 | 0,000112675 | ATP binding            |
| Δgat1 | 8-day | 2490823 | down | GO:0005524 | 0,000112675 | ATP binding            |
| Δgat1 | 8-day | 2510275 | down | GO:0005524 | 0,000112675 | ATP binding            |
| Δgat1 | 8-day | 2510445 | down | GO:0005524 | 0,000112675 | ATP binding            |

|       |       |         |      |            |             |                                                      |
|-------|-------|---------|------|------------|-------------|------------------------------------------------------|
| Δgat1 | 8-day | 2510924 | down | GO:0005524 | 0,000112675 | ATP binding                                          |
| Δgat1 | 8-day | 2581797 | down | GO:0005524 | 0,000112675 | ATP binding                                          |
| Δgat1 | 8-day | 2621533 | down | GO:0005524 | 0,000112675 | ATP binding                                          |
| Δgat1 | 8-day | 2633620 | down | GO:0005524 | 0,000112675 | ATP binding                                          |
| Δgat1 | 8-day | 2640828 | down | GO:0005524 | 0,000112675 | ATP binding                                          |
| Δgat1 | 8-day | 2641678 | down | GO:0005524 | 0,000112675 | ATP binding                                          |
| Δgat1 | 8-day | 2661304 | down | GO:0005524 | 0,000112675 | ATP binding                                          |
| Δgat1 | 8-day | 2675859 | down | GO:0005524 | 0,000112675 | ATP binding                                          |
| Δgat1 | 8-day | 2636220 | down | GO:0004316 | 0,000335515 | 3-oxoacyl-[acyl-carrier-protein] reductase activity  |
| Δgat1 | 8-day | 2636221 | down | GO:0004316 | 0,000335515 | 3-oxoacyl-[acyl-carrier-protein] reductase activity  |
| Δgat1 | 8-day | 2613657 | down | GO:0004553 | 0,000521035 | hydrolase activity, hydrolyzing O-glycosyl compounds |
| Δgat1 | 8-day | 2670422 | down | GO:0004553 | 0,000521035 | hydrolase activity, hydrolyzing O-glycosyl compounds |
| Δgat1 | 8-day | 1120318 | down | GO:0050381 | 0,001125957 | unspecific monooxygenase activity                    |
| Δgat1 | 8-day | 1358353 | down | GO:0050381 | 0,001125957 | unspecific monooxygenase activity                    |
| Δgat1 | 8-day | 2491624 | down | GO:0050381 | 0,001125957 | unspecific monooxygenase activity                    |
| Δgat1 | 8-day | 2514636 | down | GO:0050381 | 0,001125957 | unspecific monooxygenase activity                    |
| Δgat1 | 8-day | 2559987 | down | GO:0050381 | 0,001125957 | unspecific monooxygenase activity                    |
| Δgat1 | 8-day | 2619716 | down | GO:0050381 | 0,001125957 | unspecific monooxygenase activity                    |
| Δgat1 | 8-day | 2624973 | down | GO:0050381 | 0,001125957 | unspecific monooxygenase activity                    |
| Δgat1 | 8-day | 2637467 | down | GO:0050381 | 0,001125957 | unspecific monooxygenase activity                    |
| Δgat1 | 8-day | 1171024 | down | GO:0005215 | 0,003960324 | transporter activity                                 |
| Δgat1 | 8-day | 2508421 | down | GO:0005215 | 0,003960324 | transporter activity                                 |
| Δgat1 | 8-day | 2533765 | down | GO:0005215 | 0,003960324 | transporter activity                                 |
| Δgat1 | 8-day | 2550496 | down | GO:0005215 | 0,003960324 | transporter activity                                 |
| Δgat1 | 8-day | 2608744 | down | GO:0005215 | 0,003960324 | transporter activity                                 |
| Δgat1 | 8-day | 2611816 | down | GO:0005215 | 0,003960324 | transporter activity                                 |
| Δgat1 | 8-day | 2617636 | down | GO:0005215 | 0,003960324 | transporter activity                                 |
| Δgat1 | 8-day | 2619010 | down | GO:0005215 | 0,003960324 | transporter activity                                 |
| Δgat1 | 8-day | 2628098 | down | GO:0005215 | 0,003960324 | transporter activity                                 |
| Δgat1 | 8-day | 2630257 | down | GO:0005215 | 0,003960324 | transporter activity                                 |
| Δgat1 | 8-day | 2631348 | down | GO:0005215 | 0,003960324 | transporter activity                                 |
| Δgat1 | 8-day | 2632105 | down | GO:0005215 | 0,003960324 | transporter activity                                 |
| Δgat1 | 8-day | 1083109 | down | GO:0016491 | 0,012094047 | oxidoreductase activity                              |
| Δgat1 | 8-day | 1087819 | down | GO:0016491 | 0,012094047 | oxidoreductase activity                              |



|       |       |         |      |            |             |                         |
|-------|-------|---------|------|------------|-------------|-------------------------|
| Δgat1 | 8-day | 1194451 | down | GO:0016491 | 0,012094047 | oxidoreductase activity |
| Δgat1 | 8-day | 1214326 | down | GO:0016491 | 0,012094047 | oxidoreductase activity |
| Δgat1 | 8-day | 1342670 | down | GO:0016491 | 0,012094047 | oxidoreductase activity |
| Δgat1 | 8-day | 2490194 | down | GO:0016491 | 0,012094047 | oxidoreductase activity |
| Δgat1 | 8-day | 2501673 | down | GO:0016491 | 0,012094047 | oxidoreductase activity |
| Δgat1 | 8-day | 2508276 | down | GO:0016491 | 0,012094047 | oxidoreductase activity |
| Δgat1 | 8-day | 2516955 | down | GO:0016491 | 0,012094047 | oxidoreductase activity |
| Δgat1 | 8-day | 2517867 | down | GO:0016491 | 0,012094047 | oxidoreductase activity |
| Δgat1 | 8-day | 2573393 | down | GO:0016491 | 0,012094047 | oxidoreductase activity |
| Δgat1 | 8-day | 2573396 | down | GO:0016491 | 0,012094047 | oxidoreductase activity |
| Δgat1 | 8-day | 2606041 | down | GO:0016491 | 0,012094047 | oxidoreductase activity |
| Δgat1 | 8-day | 2614722 | down | GO:0016491 | 0,012094047 | oxidoreductase activity |
| Δgat1 | 8-day | 2625836 | down | GO:0016491 | 0,012094047 | oxidoreductase activity |
| Δgat1 | 8-day | 2626155 | down | GO:0016491 | 0,012094047 | oxidoreductase activity |
| Δgat1 | 8-day | 2627113 | down | GO:0016491 | 0,012094047 | oxidoreductase activity |
| Δgat1 | 8-day | 2628120 | down | GO:0016491 | 0,012094047 | oxidoreductase activity |
| Δgat1 | 8-day | 2630033 | down | GO:0016491 | 0,012094047 | oxidoreductase activity |
| Δgat1 | 8-day | 2632193 | down | GO:0016491 | 0,012094047 | oxidoreductase activity |
| Δgat1 | 8-day | 2634619 | down | GO:0016491 | 0,012094047 | oxidoreductase activity |
| Δgat1 | 8-day | 2636220 | down | GO:0016491 | 0,012094047 | oxidoreductase activity |
| Δgat1 | 8-day | 2636221 | down | GO:0016491 | 0,012094047 | oxidoreductase activity |
| Δgat1 | 8-day | 2637838 | down | GO:0016491 | 0,012094047 | oxidoreductase activity |
| Δgat1 | 8-day | 2638445 | down | GO:0016491 | 0,012094047 | oxidoreductase activity |
| Δgat1 | 8-day | 2638473 | down | GO:0016491 | 0,012094047 | oxidoreductase activity |
| Δgat1 | 8-day | 2638753 | down | GO:0016491 | 0,012094047 | oxidoreductase activity |
| Δgat1 | 8-day | 2640123 | down | GO:0016491 | 0,012094047 | oxidoreductase activity |
| Δgat1 | 8-day | 2644003 | down | GO:0016491 | 0,012094047 | oxidoreductase activity |
| Δgat1 | 8-day | 2666009 | down | GO:0016491 | 0,012094047 | oxidoreductase activity |
| Δgat1 | 8-day | 2681649 | down | GO:0016491 | 0,012094047 | oxidoreductase activity |
| Δgat1 | 8-day | 2691273 | down | GO:0016491 | 0,012094047 | oxidoreductase activity |
| Δgat1 | 8-day | 2698778 | down | GO:0016491 | 0,012094047 | oxidoreductase activity |
| Δgat1 | 8-day | 2703927 | down | GO:0016491 | 0,012094047 | oxidoreductase activity |
| Δgat1 | 8-day | 2713107 | down | GO:0016491 | 0,012094047 | oxidoreductase activity |
| Δgat1 | 8-day | 2748659 | down | GO:0016491 | 0,012094047 | oxidoreductase activity |

|       |       |         |      |            |             |                                                      |
|-------|-------|---------|------|------------|-------------|------------------------------------------------------|
| Δhom1 | 8-day | 2364606 | down | GO:0004497 | 0,001917923 | monooxygenase activity                               |
| Δhom1 | 8-day | 2635487 | down | GO:0004497 | 0,001917923 | monooxygenase activity                               |
| Δhom1 | 8-day | 2635869 | down | GO:0004497 | 0,001917923 | monooxygenase activity                               |
| Δhom1 | 8-day | 2638355 | down | GO:0004497 | 0,001917923 | monooxygenase activity                               |
| Δhom1 | 8-day | 2703628 | down | GO:0004497 | 0,001917923 | monooxygenase activity                               |
| Δhom1 | 8-day | 2502504 | down | GO:0005975 | 0,001917923 | carbohydrate metabolic process                       |
| Δhom1 | 8-day | 2514546 | down | GO:0005975 | 0,001917923 | carbohydrate metabolic process                       |
| Δhom1 | 8-day | 2605157 | down | GO:0005975 | 0,001917923 | carbohydrate metabolic process                       |
| Δhom1 | 8-day | 2612719 | down | GO:0005975 | 0,001917923 | carbohydrate metabolic process                       |
| Δhom1 | 8-day | 2613657 | down | GO:0005975 | 0,001917923 | carbohydrate metabolic process                       |
| Δhom1 | 8-day | 2636145 | down | GO:0005975 | 0,001917923 | carbohydrate metabolic process                       |
| Δhom1 | 8-day | 2645945 | down | GO:0005975 | 0,001917923 | carbohydrate metabolic process                       |
| Δhom1 | 8-day | 2502504 | down | GO:0004553 | 0,001917923 | hydrolase activity, hydrolyzing O-glycosyl compounds |
| Δhom1 | 8-day | 2605157 | down | GO:0004553 | 0,001917923 | hydrolase activity, hydrolyzing O-glycosyl compounds |
| Δhom1 | 8-day | 2612719 | down | GO:0004553 | 0,001917923 | hydrolase activity, hydrolyzing O-glycosyl compounds |
| Δhom1 | 8-day | 2613657 | down | GO:0004553 | 0,001917923 | hydrolase activity, hydrolyzing O-glycosyl compounds |
| Δhom1 | 8-day | 1214326 | down | GO:0016491 | 0,003228097 | oxidoreductase activity                              |
| Δhom1 | 8-day | 2511002 | down | GO:0016491 | 0,003228097 | oxidoreductase activity                              |
| Δhom1 | 8-day | 2606041 | down | GO:0016491 | 0,003228097 | oxidoreductase activity                              |
| Δhom1 | 8-day | 2614092 | down | GO:0016491 | 0,003228097 | oxidoreductase activity                              |
| Δhom1 | 8-day | 2618220 | down | GO:0016491 | 0,003228097 | oxidoreductase activity                              |
| Δhom1 | 8-day | 2623663 | down | GO:0016491 | 0,003228097 | oxidoreductase activity                              |
| Δhom1 | 8-day | 2623957 | down | GO:0016491 | 0,003228097 | oxidoreductase activity                              |
| Δhom1 | 8-day | 2630033 | down | GO:0016491 | 0,003228097 | oxidoreductase activity                              |
| Δhom1 | 8-day | 2637838 | down | GO:0016491 | 0,003228097 | oxidoreductase activity                              |
| Δhom1 | 8-day | 2638893 | down | GO:0016491 | 0,003228097 | oxidoreductase activity                              |
| Δhom1 | 8-day | 2639682 | down | GO:0016491 | 0,003228097 | oxidoreductase activity                              |
| Δhom1 | 8-day | 2698778 | down | GO:0016491 | 0,003228097 | oxidoreductase activity                              |
| Δhom1 | 8-day | 2713107 | down | GO:0016491 | 0,003228097 | oxidoreductase activity                              |
| Δhom1 | 8-day | 2364606 | down | GO:0006118 | 0,005982409 | electron transport                                   |
| Δhom1 | 8-day | 2614092 | down | GO:0006118 | 0,005982409 | electron transport                                   |
| Δhom1 | 8-day | 2635487 | down | GO:0006118 | 0,005982409 | electron transport                                   |
| Δhom1 | 8-day | 2635869 | down | GO:0006118 | 0,005982409 | electron transport                                   |
| Δhom1 | 8-day | 2638355 | down | GO:0006118 | 0,005982409 | electron transport                                   |

|               |       |         |      |            |             |                                                      |
|---------------|-------|---------|------|------------|-------------|------------------------------------------------------|
| $\Delta$ hom1 | 8-day | 2639682 | down | GO:0006118 | 0,005982409 | electron transport                                   |
| $\Delta$ hom1 | 8-day | 2703628 | down | GO:0006118 | 0,005982409 | electron transport                                   |
| $\Delta$ hom1 | 8-day | 2364606 | down | GO:0005506 | 0,04915661  | iron ion binding                                     |
| $\Delta$ hom1 | 8-day | 2511002 | down | GO:0005506 | 0,04915661  | iron ion binding                                     |
| $\Delta$ hom1 | 8-day | 2618220 | down | GO:0005506 | 0,04915661  | iron ion binding                                     |
| $\Delta$ hom1 | 8-day | 2635487 | down | GO:0005506 | 0,04915661  | iron ion binding                                     |
| $\Delta$ hom1 | 8-day | 2635869 | down | GO:0005506 | 0,04915661  | iron ion binding                                     |
| $\Delta$ hom1 | 8-day | 2636420 | down | GO:0005506 | 0,04915661  | iron ion binding                                     |
| $\Delta$ hom1 | 8-day | 2638355 | down | GO:0005506 | 0,04915661  | iron ion binding                                     |
| $\Delta$ hom1 | 8-day | 2703628 | down | GO:0005506 | 0,04915661  | iron ion binding                                     |
| $\Delta$ hom2 | 8-day | 2514546 | up   | GO:0005975 | 1,33E-19    | carbohydrate metabolic process                       |
| $\Delta$ hom2 | 8-day | 2611511 | up   | GO:0005975 | 1,33E-19    | carbohydrate metabolic process                       |
| $\Delta$ hom2 | 8-day | 2613657 | up   | GO:0005975 | 1,33E-19    | carbohydrate metabolic process                       |
| $\Delta$ hom2 | 8-day | 2626756 | up   | GO:0005975 | 1,33E-19    | carbohydrate metabolic process                       |
| $\Delta$ hom2 | 8-day | 2633791 | up   | GO:0005975 | 1,33E-19    | carbohydrate metabolic process                       |
| $\Delta$ hom2 | 8-day | 2641020 | up   | GO:0005975 | 1,33E-19    | carbohydrate metabolic process                       |
| $\Delta$ hom2 | 8-day | 2643740 | up   | GO:0005975 | 1,33E-19    | carbohydrate metabolic process                       |
| $\Delta$ hom2 | 8-day | 2645822 | up   | GO:0005975 | 1,33E-19    | carbohydrate metabolic process                       |
| $\Delta$ hom2 | 8-day | 2670422 | up   | GO:0005975 | 1,33E-19    | carbohydrate metabolic process                       |
| $\Delta$ hom2 | 8-day | 2704222 | up   | GO:0005975 | 1,33E-19    | carbohydrate metabolic process                       |
| $\Delta$ hom2 | 8-day | 2706622 | up   | GO:0005975 | 1,33E-19    | carbohydrate metabolic process                       |
| $\Delta$ hom2 | 8-day | 2611511 | up   | GO:0004553 | 3,41E-17    | hydrolase activity, hydrolyzing O-glycosyl compounds |
| $\Delta$ hom2 | 8-day | 2613657 | up   | GO:0004553 | 3,41E-17    | hydrolase activity, hydrolyzing O-glycosyl compounds |
| $\Delta$ hom2 | 8-day | 2643740 | up   | GO:0004553 | 3,41E-17    | hydrolase activity, hydrolyzing O-glycosyl compounds |
| $\Delta$ hom2 | 8-day | 2645822 | up   | GO:0004553 | 3,41E-17    | hydrolase activity, hydrolyzing O-glycosyl compounds |
| $\Delta$ hom2 | 8-day | 2670422 | up   | GO:0004553 | 3,41E-17    | hydrolase activity, hydrolyzing O-glycosyl compounds |
| $\Delta$ hom2 | 8-day | 2704222 | up   | GO:0004553 | 3,41E-17    | hydrolase activity, hydrolyzing O-glycosyl compounds |
| $\Delta$ hom2 | 8-day | 2706622 | up   | GO:0004553 | 3,41E-17    | hydrolase activity, hydrolyzing O-glycosyl compounds |
| $\Delta$ hom2 | 8-day | 2643740 | up   | GO:0030246 | 2,52E-07    | carbohydrate binding                                 |
| $\Delta$ hom2 | 8-day | 2706622 | up   | GO:0030246 | 2,52E-07    | carbohydrate binding                                 |
| $\Delta$ hom2 | 8-day | 48473   | up   | GO:0003824 | 1,44E-06    | catalytic activity                                   |
| $\Delta$ hom2 | 8-day | 1150509 | up   | GO:0003824 | 1,44E-06    | catalytic activity                                   |
| $\Delta$ hom2 | 8-day | 2491365 | up   | GO:0003824 | 1,44E-06    | catalytic activity                                   |
| $\Delta$ hom2 | 8-day | 2502008 | up   | GO:0003824 | 1,44E-06    | catalytic activity                                   |

|               |       |         |    |            |          |                         |
|---------------|-------|---------|----|------------|----------|-------------------------|
| $\Delta$ hom2 | 8-day | 2514546 | up | GO:0003824 | 1,44E-06 | catalytic activity      |
| $\Delta$ hom2 | 8-day | 2516444 | up | GO:0003824 | 1,44E-06 | catalytic activity      |
| $\Delta$ hom2 | 8-day | 2516959 | up | GO:0003824 | 1,44E-06 | catalytic activity      |
| $\Delta$ hom2 | 8-day | 2592175 | up | GO:0003824 | 1,44E-06 | catalytic activity      |
| $\Delta$ hom2 | 8-day | 2594114 | up | GO:0003824 | 1,44E-06 | catalytic activity      |
| $\Delta$ hom2 | 8-day | 2614113 | up | GO:0003824 | 1,44E-06 | catalytic activity      |
| $\Delta$ hom2 | 8-day | 2616512 | up | GO:0003824 | 1,44E-06 | catalytic activity      |
| $\Delta$ hom2 | 8-day | 2617245 | up | GO:0003824 | 1,44E-06 | catalytic activity      |
| $\Delta$ hom2 | 8-day | 2618252 | up | GO:0003824 | 1,44E-06 | catalytic activity      |
| $\Delta$ hom2 | 8-day | 2623957 | up | GO:0003824 | 1,44E-06 | catalytic activity      |
| $\Delta$ hom2 | 8-day | 2626155 | up | GO:0003824 | 1,44E-06 | catalytic activity      |
| $\Delta$ hom2 | 8-day | 2626172 | up | GO:0003824 | 1,44E-06 | catalytic activity      |
| $\Delta$ hom2 | 8-day | 2626756 | up | GO:0003824 | 1,44E-06 | catalytic activity      |
| $\Delta$ hom2 | 8-day | 2627304 | up | GO:0003824 | 1,44E-06 | catalytic activity      |
| $\Delta$ hom2 | 8-day | 2632193 | up | GO:0003824 | 1,44E-06 | catalytic activity      |
| $\Delta$ hom2 | 8-day | 2634217 | up | GO:0003824 | 1,44E-06 | catalytic activity      |
| $\Delta$ hom2 | 8-day | 2634903 | up | GO:0003824 | 1,44E-06 | catalytic activity      |
| $\Delta$ hom2 | 8-day | 2635219 | up | GO:0003824 | 1,44E-06 | catalytic activity      |
| $\Delta$ hom2 | 8-day | 2636220 | up | GO:0003824 | 1,44E-06 | catalytic activity      |
| $\Delta$ hom2 | 8-day | 2638445 | up | GO:0003824 | 1,44E-06 | catalytic activity      |
| $\Delta$ hom2 | 8-day | 2638893 | up | GO:0003824 | 1,44E-06 | catalytic activity      |
| $\Delta$ hom2 | 8-day | 2640123 | up | GO:0003824 | 1,44E-06 | catalytic activity      |
| $\Delta$ hom2 | 8-day | 2641020 | up | GO:0003824 | 1,44E-06 | catalytic activity      |
| $\Delta$ hom2 | 8-day | 2641553 | up | GO:0003824 | 1,44E-06 | catalytic activity      |
| $\Delta$ hom2 | 8-day | 2681649 | up | GO:0003824 | 1,44E-06 | catalytic activity      |
| $\Delta$ hom2 | 8-day | 2682272 | up | GO:0003824 | 1,44E-06 | catalytic activity      |
| $\Delta$ hom2 | 8-day | 2684249 | up | GO:0003824 | 1,44E-06 | catalytic activity      |
| $\Delta$ hom2 | 8-day | 2748659 | up | GO:0003824 | 1,44E-06 | catalytic activity      |
| $\Delta$ hom2 | 8-day | 1194451 | up | GO:0016491 | 7,27E-06 | oxidoreductase activity |
| $\Delta$ hom2 | 8-day | 1342670 | up | GO:0016491 | 7,27E-06 | oxidoreductase activity |
| $\Delta$ hom2 | 8-day | 2490194 | up | GO:0016491 | 7,27E-06 | oxidoreductase activity |
| $\Delta$ hom2 | 8-day | 2501673 | up | GO:0016491 | 7,27E-06 | oxidoreductase activity |
| $\Delta$ hom2 | 8-day | 2506612 | up | GO:0016491 | 7,27E-06 | oxidoreductase activity |
| $\Delta$ hom2 | 8-day | 2509814 | up | GO:0016491 | 7,27E-06 | oxidoreductase activity |

|               |       |         |    |            |          |                         |
|---------------|-------|---------|----|------------|----------|-------------------------|
| $\Delta$ hom2 | 8-day | 2516444 | up | GO:0016491 | 7,27E-06 | oxidoreductase activity |
| $\Delta$ hom2 | 8-day | 2516959 | up | GO:0016491 | 7,27E-06 | oxidoreductase activity |
| $\Delta$ hom2 | 8-day | 2524219 | up | GO:0016491 | 7,27E-06 | oxidoreductase activity |
| $\Delta$ hom2 | 8-day | 2557571 | up | GO:0016491 | 7,27E-06 | oxidoreductase activity |
| $\Delta$ hom2 | 8-day | 2573393 | up | GO:0016491 | 7,27E-06 | oxidoreductase activity |
| $\Delta$ hom2 | 8-day | 2573396 | up | GO:0016491 | 7,27E-06 | oxidoreductase activity |
| $\Delta$ hom2 | 8-day | 2583399 | up | GO:0016491 | 7,27E-06 | oxidoreductase activity |
| $\Delta$ hom2 | 8-day | 2606041 | up | GO:0016491 | 7,27E-06 | oxidoreductase activity |
| $\Delta$ hom2 | 8-day | 2611287 | up | GO:0016491 | 7,27E-06 | oxidoreductase activity |
| $\Delta$ hom2 | 8-day | 2617060 | up | GO:0016491 | 7,27E-06 | oxidoreductase activity |
| $\Delta$ hom2 | 8-day | 2622733 | up | GO:0016491 | 7,27E-06 | oxidoreductase activity |
| $\Delta$ hom2 | 8-day | 2623957 | up | GO:0016491 | 7,27E-06 | oxidoreductase activity |
| $\Delta$ hom2 | 8-day | 2625241 | up | GO:0016491 | 7,27E-06 | oxidoreductase activity |
| $\Delta$ hom2 | 8-day | 2625836 | up | GO:0016491 | 7,27E-06 | oxidoreductase activity |
| $\Delta$ hom2 | 8-day | 2626155 | up | GO:0016491 | 7,27E-06 | oxidoreductase activity |
| $\Delta$ hom2 | 8-day | 2627304 | up | GO:0016491 | 7,27E-06 | oxidoreductase activity |
| $\Delta$ hom2 | 8-day | 2632193 | up | GO:0016491 | 7,27E-06 | oxidoreductase activity |
| $\Delta$ hom2 | 8-day | 2632403 | up | GO:0016491 | 7,27E-06 | oxidoreductase activity |
| $\Delta$ hom2 | 8-day | 2634217 | up | GO:0016491 | 7,27E-06 | oxidoreductase activity |
| $\Delta$ hom2 | 8-day | 2634619 | up | GO:0016491 | 7,27E-06 | oxidoreductase activity |
| $\Delta$ hom2 | 8-day | 2634903 | up | GO:0016491 | 7,27E-06 | oxidoreductase activity |
| $\Delta$ hom2 | 8-day | 2636220 | up | GO:0016491 | 7,27E-06 | oxidoreductase activity |
| $\Delta$ hom2 | 8-day | 2638445 | up | GO:0016491 | 7,27E-06 | oxidoreductase activity |
| $\Delta$ hom2 | 8-day | 2638473 | up | GO:0016491 | 7,27E-06 | oxidoreductase activity |
| $\Delta$ hom2 | 8-day | 2638753 | up | GO:0016491 | 7,27E-06 | oxidoreductase activity |
| $\Delta$ hom2 | 8-day | 2638893 | up | GO:0016491 | 7,27E-06 | oxidoreductase activity |
| $\Delta$ hom2 | 8-day | 2640123 | up | GO:0016491 | 7,27E-06 | oxidoreductase activity |
| $\Delta$ hom2 | 8-day | 2681649 | up | GO:0016491 | 7,27E-06 | oxidoreductase activity |
| $\Delta$ hom2 | 8-day | 2691273 | up | GO:0016491 | 7,27E-06 | oxidoreductase activity |
| $\Delta$ hom2 | 8-day | 2703927 | up | GO:0016491 | 7,27E-06 | oxidoreductase activity |
| $\Delta$ hom2 | 8-day | 2713107 | up | GO:0016491 | 7,27E-06 | oxidoreductase activity |
| $\Delta$ hom2 | 8-day | 2748659 | up | GO:0016491 | 7,27E-06 | oxidoreductase activity |
| $\Delta$ hom2 | 8-day | 1111500 | up | GO:0005215 | 3,03E-05 | transporter activity    |
| $\Delta$ hom2 | 8-day | 1154281 | up | GO:0005215 | 3,03E-05 | transporter activity    |

|               |       |         |    |            |          |                      |
|---------------|-------|---------|----|------------|----------|----------------------|
| $\Delta$ hom2 | 8-day | 1234296 | up | GO:0005215 | 3,03E-05 | transporter activity |
| $\Delta$ hom2 | 8-day | 2145491 | up | GO:0005215 | 3,03E-05 | transporter activity |
| $\Delta$ hom2 | 8-day | 2487072 | up | GO:0005215 | 3,03E-05 | transporter activity |
| $\Delta$ hom2 | 8-day | 2488479 | up | GO:0005215 | 3,03E-05 | transporter activity |
| $\Delta$ hom2 | 8-day | 2502284 | up | GO:0005215 | 3,03E-05 | transporter activity |
| $\Delta$ hom2 | 8-day | 2508421 | up | GO:0005215 | 3,03E-05 | transporter activity |
| $\Delta$ hom2 | 8-day | 2508697 | up | GO:0005215 | 3,03E-05 | transporter activity |
| $\Delta$ hom2 | 8-day | 2600551 | up | GO:0005215 | 3,03E-05 | transporter activity |
| $\Delta$ hom2 | 8-day | 2612313 | up | GO:0005215 | 3,03E-05 | transporter activity |
| $\Delta$ hom2 | 8-day | 2617636 | up | GO:0005215 | 3,03E-05 | transporter activity |
| $\Delta$ hom2 | 8-day | 2618842 | up | GO:0005215 | 3,03E-05 | transporter activity |
| $\Delta$ hom2 | 8-day | 2619010 | up | GO:0005215 | 3,03E-05 | transporter activity |
| $\Delta$ hom2 | 8-day | 2623043 | up | GO:0005215 | 3,03E-05 | transporter activity |
| $\Delta$ hom2 | 8-day | 2628098 | up | GO:0005215 | 3,03E-05 | transporter activity |
| $\Delta$ hom2 | 8-day | 2628982 | up | GO:0005215 | 3,03E-05 | transporter activity |
| $\Delta$ hom2 | 8-day | 2631348 | up | GO:0005215 | 3,03E-05 | transporter activity |
| $\Delta$ hom2 | 8-day | 2632105 | up | GO:0005215 | 3,03E-05 | transporter activity |
| $\Delta$ hom2 | 8-day | 2633216 | up | GO:0005215 | 3,03E-05 | transporter activity |
| $\Delta$ hom2 | 8-day | 2633874 | up | GO:0005215 | 3,03E-05 | transporter activity |
| $\Delta$ hom2 | 8-day | 2641735 | up | GO:0005215 | 3,03E-05 | transporter activity |
| $\Delta$ hom2 | 8-day | 2642894 | up | GO:0005215 | 3,03E-05 | transporter activity |
| $\Delta$ hom2 | 8-day | 2738153 | up | GO:0005215 | 3,03E-05 | transporter activity |
| $\Delta$ hom2 | 8-day | 48473   | up | GO:0008152 | 7,83E-05 | metabolic process    |
| $\Delta$ hom2 | 8-day | 1099466 | up | GO:0008152 | 7,83E-05 | metabolic process    |
| $\Delta$ hom2 | 8-day | 1150509 | up | GO:0008152 | 7,83E-05 | metabolic process    |
| $\Delta$ hom2 | 8-day | 1202278 | up | GO:0008152 | 7,83E-05 | metabolic process    |
| $\Delta$ hom2 | 8-day | 1279479 | up | GO:0008152 | 7,83E-05 | metabolic process    |
| $\Delta$ hom2 | 8-day | 1342670 | up | GO:0008152 | 7,83E-05 | metabolic process    |
| $\Delta$ hom2 | 8-day | 2490194 | up | GO:0008152 | 7,83E-05 | metabolic process    |
| $\Delta$ hom2 | 8-day | 2491365 | up | GO:0008152 | 7,83E-05 | metabolic process    |
| $\Delta$ hom2 | 8-day | 2491542 | up | GO:0008152 | 7,83E-05 | metabolic process    |
| $\Delta$ hom2 | 8-day | 2501673 | up | GO:0008152 | 7,83E-05 | metabolic process    |
| $\Delta$ hom2 | 8-day | 2502008 | up | GO:0008152 | 7,83E-05 | metabolic process    |
| $\Delta$ hom2 | 8-day | 2516959 | up | GO:0008152 | 7,83E-05 | metabolic process    |

|               |       |         |    |            |          |                   |
|---------------|-------|---------|----|------------|----------|-------------------|
| $\Delta$ hom2 | 8-day | 2557571 | up | GO:0008152 | 7,83E-05 | metabolic process |
| $\Delta$ hom2 | 8-day | 2573393 | up | GO:0008152 | 7,83E-05 | metabolic process |
| $\Delta$ hom2 | 8-day | 2573396 | up | GO:0008152 | 7,83E-05 | metabolic process |
| $\Delta$ hom2 | 8-day | 2583540 | up | GO:0008152 | 7,83E-05 | metabolic process |
| $\Delta$ hom2 | 8-day | 2589496 | up | GO:0008152 | 7,83E-05 | metabolic process |
| $\Delta$ hom2 | 8-day | 2594114 | up | GO:0008152 | 7,83E-05 | metabolic process |
| $\Delta$ hom2 | 8-day | 2606041 | up | GO:0008152 | 7,83E-05 | metabolic process |
| $\Delta$ hom2 | 8-day | 2616280 | up | GO:0008152 | 7,83E-05 | metabolic process |
| $\Delta$ hom2 | 8-day | 2616512 | up | GO:0008152 | 7,83E-05 | metabolic process |
| $\Delta$ hom2 | 8-day | 2617245 | up | GO:0008152 | 7,83E-05 | metabolic process |
| $\Delta$ hom2 | 8-day | 2622385 | up | GO:0008152 | 7,83E-05 | metabolic process |
| $\Delta$ hom2 | 8-day | 2623957 | up | GO:0008152 | 7,83E-05 | metabolic process |
| $\Delta$ hom2 | 8-day | 2624525 | up | GO:0008152 | 7,83E-05 | metabolic process |
| $\Delta$ hom2 | 8-day | 2624569 | up | GO:0008152 | 7,83E-05 | metabolic process |
| $\Delta$ hom2 | 8-day | 2625241 | up | GO:0008152 | 7,83E-05 | metabolic process |
| $\Delta$ hom2 | 8-day | 2625836 | up | GO:0008152 | 7,83E-05 | metabolic process |
| $\Delta$ hom2 | 8-day | 2626172 | up | GO:0008152 | 7,83E-05 | metabolic process |
| $\Delta$ hom2 | 8-day | 2627304 | up | GO:0008152 | 7,83E-05 | metabolic process |
| $\Delta$ hom2 | 8-day | 2628358 | up | GO:0008152 | 7,83E-05 | metabolic process |
| $\Delta$ hom2 | 8-day | 2632193 | up | GO:0008152 | 7,83E-05 | metabolic process |
| $\Delta$ hom2 | 8-day | 2634217 | up | GO:0008152 | 7,83E-05 | metabolic process |
| $\Delta$ hom2 | 8-day | 2634903 | up | GO:0008152 | 7,83E-05 | metabolic process |
| $\Delta$ hom2 | 8-day | 2636220 | up | GO:0008152 | 7,83E-05 | metabolic process |
| $\Delta$ hom2 | 8-day | 2638445 | up | GO:0008152 | 7,83E-05 | metabolic process |
| $\Delta$ hom2 | 8-day | 2638473 | up | GO:0008152 | 7,83E-05 | metabolic process |
| $\Delta$ hom2 | 8-day | 2641553 | up | GO:0008152 | 7,83E-05 | metabolic process |
| $\Delta$ hom2 | 8-day | 2668051 | up | GO:0008152 | 7,83E-05 | metabolic process |
| $\Delta$ hom2 | 8-day | 2681649 | up | GO:0008152 | 7,83E-05 | metabolic process |
| $\Delta$ hom2 | 8-day | 2682272 | up | GO:0008152 | 7,83E-05 | metabolic process |
| $\Delta$ hom2 | 8-day | 2696676 | up | GO:0008152 | 7,83E-05 | metabolic process |
| $\Delta$ hom2 | 8-day | 2703927 | up | GO:0008152 | 7,83E-05 | metabolic process |
| $\Delta$ hom2 | 8-day | 2713107 | up | GO:0008152 | 7,83E-05 | metabolic process |
| $\Delta$ hom2 | 8-day | 2726410 | up | GO:0008152 | 7,83E-05 | metabolic process |
| $\Delta$ hom2 | 8-day | 2749557 | up | GO:0008152 | 7,83E-05 | metabolic process |

|               |       |         |    |            |             |                      |
|---------------|-------|---------|----|------------|-------------|----------------------|
| $\Delta$ hom2 | 8-day | 1133978 | up | GO:0016021 | 9,97E-05    | integral to membrane |
| $\Delta$ hom2 | 8-day | 1154281 | up | GO:0016021 | 9,97E-05    | integral to membrane |
| $\Delta$ hom2 | 8-day | 1234296 | up | GO:0016021 | 9,97E-05    | integral to membrane |
| $\Delta$ hom2 | 8-day | 2145491 | up | GO:0016021 | 9,97E-05    | integral to membrane |
| $\Delta$ hom2 | 8-day | 2279823 | up | GO:0016021 | 9,97E-05    | integral to membrane |
| $\Delta$ hom2 | 8-day | 2487072 | up | GO:0016021 | 9,97E-05    | integral to membrane |
| $\Delta$ hom2 | 8-day | 2488479 | up | GO:0016021 | 9,97E-05    | integral to membrane |
| $\Delta$ hom2 | 8-day | 2505704 | up | GO:0016021 | 9,97E-05    | integral to membrane |
| $\Delta$ hom2 | 8-day | 2508421 | up | GO:0016021 | 9,97E-05    | integral to membrane |
| $\Delta$ hom2 | 8-day | 2508697 | up | GO:0016021 | 9,97E-05    | integral to membrane |
| $\Delta$ hom2 | 8-day | 2612313 | up | GO:0016021 | 9,97E-05    | integral to membrane |
| $\Delta$ hom2 | 8-day | 2612912 | up | GO:0016021 | 9,97E-05    | integral to membrane |
| $\Delta$ hom2 | 8-day | 2617636 | up | GO:0016021 | 9,97E-05    | integral to membrane |
| $\Delta$ hom2 | 8-day | 2618842 | up | GO:0016021 | 9,97E-05    | integral to membrane |
| $\Delta$ hom2 | 8-day | 2619010 | up | GO:0016021 | 9,97E-05    | integral to membrane |
| $\Delta$ hom2 | 8-day | 2623043 | up | GO:0016021 | 9,97E-05    | integral to membrane |
| $\Delta$ hom2 | 8-day | 2628982 | up | GO:0016021 | 9,97E-05    | integral to membrane |
| $\Delta$ hom2 | 8-day | 2631348 | up | GO:0016021 | 9,97E-05    | integral to membrane |
| $\Delta$ hom2 | 8-day | 2632105 | up | GO:0016021 | 9,97E-05    | integral to membrane |
| $\Delta$ hom2 | 8-day | 2633216 | up | GO:0016021 | 9,97E-05    | integral to membrane |
| $\Delta$ hom2 | 8-day | 2633874 | up | GO:0016021 | 9,97E-05    | integral to membrane |
| $\Delta$ hom2 | 8-day | 2635198 | up | GO:0016021 | 9,97E-05    | integral to membrane |
| $\Delta$ hom2 | 8-day | 2638969 | up | GO:0016021 | 9,97E-05    | integral to membrane |
| $\Delta$ hom2 | 8-day | 2642116 | up | GO:0016021 | 9,97E-05    | integral to membrane |
| $\Delta$ hom2 | 8-day | 2642894 | up | GO:0016021 | 9,97E-05    | integral to membrane |
| $\Delta$ hom2 | 8-day | 2675859 | up | GO:0016021 | 9,97E-05    | integral to membrane |
| $\Delta$ hom2 | 8-day | 78628   | up | GO:0006118 | 0,003343327 | electron transport   |
| $\Delta$ hom2 | 8-day | 1120318 | up | GO:0006118 | 0,003343327 | electron transport   |
| $\Delta$ hom2 | 8-day | 1215660 | up | GO:0006118 | 0,003343327 | electron transport   |
| $\Delta$ hom2 | 8-day | 1342670 | up | GO:0006118 | 0,003343327 | electron transport   |
| $\Delta$ hom2 | 8-day | 2490194 | up | GO:0006118 | 0,003343327 | electron transport   |
| $\Delta$ hom2 | 8-day | 2491624 | up | GO:0006118 | 0,003343327 | electron transport   |
| $\Delta$ hom2 | 8-day | 2501258 | up | GO:0006118 | 0,003343327 | electron transport   |
| $\Delta$ hom2 | 8-day | 2514636 | up | GO:0006118 | 0,003343327 | electron transport   |



|       |       |         |    |            |             |                             |
|-------|-------|---------|----|------------|-------------|-----------------------------|
| Δhom2 | 8-day | 2516208 | up | GO:0006118 | 0,003343327 | electron transport          |
| Δhom2 | 8-day | 2517480 | up | GO:0006118 | 0,003343327 | electron transport          |
| Δhom2 | 8-day | 2557571 | up | GO:0006118 | 0,003343327 | electron transport          |
| Δhom2 | 8-day | 2573393 | up | GO:0006118 | 0,003343327 | electron transport          |
| Δhom2 | 8-day | 2573396 | up | GO:0006118 | 0,003343327 | electron transport          |
| Δhom2 | 8-day | 2583399 | up | GO:0006118 | 0,003343327 | electron transport          |
| Δhom2 | 8-day | 2605889 | up | GO:0006118 | 0,003343327 | electron transport          |
| Δhom2 | 8-day | 2614998 | up | GO:0006118 | 0,003343327 | electron transport          |
| Δhom2 | 8-day | 2616590 | up | GO:0006118 | 0,003343327 | electron transport          |
| Δhom2 | 8-day | 2622733 | up | GO:0006118 | 0,003343327 | electron transport          |
| Δhom2 | 8-day | 2628651 | up | GO:0006118 | 0,003343327 | electron transport          |
| Δhom2 | 8-day | 2629864 | up | GO:0006118 | 0,003343327 | electron transport          |
| Δhom2 | 8-day | 2633776 | up | GO:0006118 | 0,003343327 | electron transport          |
| Δhom2 | 8-day | 2635870 | up | GO:0006118 | 0,003343327 | electron transport          |
| Δhom2 | 8-day | 2637467 | up | GO:0006118 | 0,003343327 | electron transport          |
| Δhom2 | 8-day | 2638282 | up | GO:0006118 | 0,003343327 | electron transport          |
| Δhom2 | 8-day | 2638350 | up | GO:0006118 | 0,003343327 | electron transport          |
| Δhom2 | 8-day | 2638355 | up | GO:0006118 | 0,003343327 | electron transport          |
| Δhom2 | 8-day | 2638473 | up | GO:0006118 | 0,003343327 | electron transport          |
| Δhom2 | 8-day | 2640550 | up | GO:0006118 | 0,003343327 | electron transport          |
| Δhom2 | 8-day | 2666440 | up | GO:0006118 | 0,003343327 | electron transport          |
| Δhom2 | 8-day | 2703927 | up | GO:0006118 | 0,003343327 | electron transport          |
| Δhom2 | 8-day | 2753029 | up | GO:0006118 | 0,003343327 | electron transport          |
| Δhom2 | 8-day | 1183234 | up | GO:0030170 | 0,003343327 | pyridoxal phosphate binding |
| Δhom2 | 8-day | 2560780 | up | GO:0030170 | 0,003343327 | pyridoxal phosphate binding |
| Δhom2 | 8-day | 2625520 | up | GO:0030170 | 0,003343327 | pyridoxal phosphate binding |
| Δhom2 | 8-day | 2619010 | up | GO:0008643 | 0,003777816 | carbohydrate transport      |
| Δhom2 | 8-day | 2623043 | up | GO:0008643 | 0,003777816 | carbohydrate transport      |
| Δhom2 | 8-day | 1111500 | up | GO:0006810 | 0,004083984 | transport                   |
| Δhom2 | 8-day | 1133978 | up | GO:0006810 | 0,004083984 | transport                   |
| Δhom2 | 8-day | 1154281 | up | GO:0006810 | 0,004083984 | transport                   |
| Δhom2 | 8-day | 1234296 | up | GO:0006810 | 0,004083984 | transport                   |
| Δhom2 | 8-day | 2145491 | up | GO:0006810 | 0,004083984 | transport                   |
| Δhom2 | 8-day | 2279823 | up | GO:0006810 | 0,004083984 | transport                   |

|               |       |         |    |            |             |                                |
|---------------|-------|---------|----|------------|-------------|--------------------------------|
| $\Delta$ hom2 | 8-day | 2487072 | up | GO:0006810 | 0,004083984 | transport                      |
| $\Delta$ hom2 | 8-day | 2488479 | up | GO:0006810 | 0,004083984 | transport                      |
| $\Delta$ hom2 | 8-day | 2493264 | up | GO:0006810 | 0,004083984 | transport                      |
| $\Delta$ hom2 | 8-day | 2502284 | up | GO:0006810 | 0,004083984 | transport                      |
| $\Delta$ hom2 | 8-day | 2508421 | up | GO:0006810 | 0,004083984 | transport                      |
| $\Delta$ hom2 | 8-day | 2508697 | up | GO:0006810 | 0,004083984 | transport                      |
| $\Delta$ hom2 | 8-day | 2525886 | up | GO:0006810 | 0,004083984 | transport                      |
| $\Delta$ hom2 | 8-day | 2600551 | up | GO:0006810 | 0,004083984 | transport                      |
| $\Delta$ hom2 | 8-day | 2612313 | up | GO:0006810 | 0,004083984 | transport                      |
| $\Delta$ hom2 | 8-day | 2612912 | up | GO:0006810 | 0,004083984 | transport                      |
| $\Delta$ hom2 | 8-day | 2617458 | up | GO:0006810 | 0,004083984 | transport                      |
| $\Delta$ hom2 | 8-day | 2617636 | up | GO:0006810 | 0,004083984 | transport                      |
| $\Delta$ hom2 | 8-day | 2618842 | up | GO:0006810 | 0,004083984 | transport                      |
| $\Delta$ hom2 | 8-day | 2619010 | up | GO:0006810 | 0,004083984 | transport                      |
| $\Delta$ hom2 | 8-day | 2620257 | up | GO:0006810 | 0,004083984 | transport                      |
| $\Delta$ hom2 | 8-day | 2622049 | up | GO:0006810 | 0,004083984 | transport                      |
| $\Delta$ hom2 | 8-day | 2623043 | up | GO:0006810 | 0,004083984 | transport                      |
| $\Delta$ hom2 | 8-day | 2628098 | up | GO:0006810 | 0,004083984 | transport                      |
| $\Delta$ hom2 | 8-day | 2628982 | up | GO:0006810 | 0,004083984 | transport                      |
| $\Delta$ hom2 | 8-day | 2631348 | up | GO:0006810 | 0,004083984 | transport                      |
| $\Delta$ hom2 | 8-day | 2631822 | up | GO:0006810 | 0,004083984 | transport                      |
| $\Delta$ hom2 | 8-day | 2632105 | up | GO:0006810 | 0,004083984 | transport                      |
| $\Delta$ hom2 | 8-day | 2633216 | up | GO:0006810 | 0,004083984 | transport                      |
| $\Delta$ hom2 | 8-day | 2633874 | up | GO:0006810 | 0,004083984 | transport                      |
| $\Delta$ hom2 | 8-day | 2635519 | up | GO:0006810 | 0,004083984 | transport                      |
| $\Delta$ hom2 | 8-day | 2636140 | up | GO:0006810 | 0,004083984 | transport                      |
| $\Delta$ hom2 | 8-day | 2638969 | up | GO:0006810 | 0,004083984 | transport                      |
| $\Delta$ hom2 | 8-day | 2641735 | up | GO:0006810 | 0,004083984 | transport                      |
| $\Delta$ hom2 | 8-day | 2642116 | up | GO:0006810 | 0,004083984 | transport                      |
| $\Delta$ hom2 | 8-day | 2642364 | up | GO:0006810 | 0,004083984 | transport                      |
| $\Delta$ hom2 | 8-day | 2642894 | up | GO:0006810 | 0,004083984 | transport                      |
| $\Delta$ hom2 | 8-day | 2675859 | up | GO:0006810 | 0,004083984 | transport                      |
| $\Delta$ hom2 | 8-day | 2738153 | up | GO:0006810 | 0,004083984 | transport                      |
| $\Delta$ hom2 | 8-day | 2619010 | up | GO:0008733 | 0,004335371 | L-arabinose isomerase activity |

|               |       |         |    |            |             |                                                                       |
|---------------|-------|---------|----|------------|-------------|-----------------------------------------------------------------------|
| $\Delta$ hom2 | 8-day | 2623043 | up | GO:0008733 | 0,004335371 | L-arabinose isomerase activity                                        |
| $\Delta$ hom2 | 8-day | 2627902 | up | GO:0005576 | 0,004965807 | extracellular region                                                  |
| $\Delta$ hom2 | 8-day | 2627923 | up | GO:0005576 | 0,004965807 | extracellular region                                                  |
| $\Delta$ hom2 | 8-day | 2643740 | up | GO:0005576 | 0,004965807 | extracellular region                                                  |
| $\Delta$ hom2 | 8-day | 2706622 | up | GO:0005576 | 0,004965807 | extracellular region                                                  |
| $\Delta$ hom2 | 8-day | 2619010 | up | GO:0005351 | 0,00660336  | sugar:hydrogen symporter activity                                     |
| $\Delta$ hom2 | 8-day | 2623043 | up | GO:0005351 | 0,00660336  | sugar:hydrogen symporter activity                                     |
| $\Delta$ hom2 | 8-day | 2501673 | up | GO:0006520 | 0,022257414 | amino acid metabolic process                                          |
| $\Delta$ hom2 | 8-day | 78628   | up | GO:0005506 | 0,025481173 | iron ion binding                                                      |
| $\Delta$ hom2 | 8-day | 1120318 | up | GO:0005506 | 0,025481173 | iron ion binding                                                      |
| $\Delta$ hom2 | 8-day | 2491624 | up | GO:0005506 | 0,025481173 | iron ion binding                                                      |
| $\Delta$ hom2 | 8-day | 2501258 | up | GO:0005506 | 0,025481173 | iron ion binding                                                      |
| $\Delta$ hom2 | 8-day | 2514636 | up | GO:0005506 | 0,025481173 | iron ion binding                                                      |
| $\Delta$ hom2 | 8-day | 2516208 | up | GO:0005506 | 0,025481173 | iron ion binding                                                      |
| $\Delta$ hom2 | 8-day | 2517480 | up | GO:0005506 | 0,025481173 | iron ion binding                                                      |
| $\Delta$ hom2 | 8-day | 2616590 | up | GO:0005506 | 0,025481173 | iron ion binding                                                      |
| $\Delta$ hom2 | 8-day | 2617060 | up | GO:0005506 | 0,025481173 | iron ion binding                                                      |
| $\Delta$ hom2 | 8-day | 2628651 | up | GO:0005506 | 0,025481173 | iron ion binding                                                      |
| $\Delta$ hom2 | 8-day | 2629864 | up | GO:0005506 | 0,025481173 | iron ion binding                                                      |
| $\Delta$ hom2 | 8-day | 2633776 | up | GO:0005506 | 0,025481173 | iron ion binding                                                      |
| $\Delta$ hom2 | 8-day | 2635870 | up | GO:0005506 | 0,025481173 | iron ion binding                                                      |
| $\Delta$ hom2 | 8-day | 2637467 | up | GO:0005506 | 0,025481173 | iron ion binding                                                      |
| $\Delta$ hom2 | 8-day | 2638282 | up | GO:0005506 | 0,025481173 | iron ion binding                                                      |
| $\Delta$ hom2 | 8-day | 2638350 | up | GO:0005506 | 0,025481173 | iron ion binding                                                      |
| $\Delta$ hom2 | 8-day | 2638355 | up | GO:0005506 | 0,025481173 | iron ion binding                                                      |
| $\Delta$ hom2 | 8-day | 2640550 | up | GO:0005506 | 0,025481173 | iron ion binding                                                      |
| $\Delta$ hom2 | 8-day | 2666440 | up | GO:0005506 | 0,025481173 | iron ion binding                                                      |
| $\Delta$ hom2 | 8-day | 2753029 | up | GO:0005506 | 0,025481173 | iron ion binding                                                      |
| $\Delta$ hom2 | 8-day | 2626756 | up | GO:0016810 | 0,025481173 | hydrolase activity, acting on carbon-nitrogen (but not peptide) bonds |
| $\Delta$ hom2 | 8-day | 2633738 | up | GO:0016810 | 0,025481173 | hydrolase activity, acting on carbon-nitrogen (but not peptide) bonds |
| $\Delta$ hom2 | 8-day | 2641020 | up | GO:0016810 | 0,025481173 | hydrolase activity, acting on carbon-nitrogen (but not peptide) bonds |

|       |       |         |      |            |             |                                                          |
|-------|-------|---------|------|------------|-------------|----------------------------------------------------------|
| Δhom2 | 8-day | 78628   | up   | GO:0004497 | 0,025481173 | monooxygenase activity                                   |
| Δhom2 | 8-day | 1120318 | up   | GO:0004497 | 0,025481173 | monooxygenase activity                                   |
| Δhom2 | 8-day | 1342670 | up   | GO:0004497 | 0,025481173 | monooxygenase activity                                   |
| Δhom2 | 8-day | 2490194 | up   | GO:0004497 | 0,025481173 | monooxygenase activity                                   |
| Δhom2 | 8-day | 2491624 | up   | GO:0004497 | 0,025481173 | monooxygenase activity                                   |
| Δhom2 | 8-day | 2501258 | up   | GO:0004497 | 0,025481173 | monooxygenase activity                                   |
| Δhom2 | 8-day | 2514636 | up   | GO:0004497 | 0,025481173 | monooxygenase activity                                   |
| Δhom2 | 8-day | 2516208 | up   | GO:0004497 | 0,025481173 | monooxygenase activity                                   |
| Δhom2 | 8-day | 2517480 | up   | GO:0004497 | 0,025481173 | monooxygenase activity                                   |
| Δhom2 | 8-day | 2557571 | up   | GO:0004497 | 0,025481173 | monooxygenase activity                                   |
| Δhom2 | 8-day | 2573393 | up   | GO:0004497 | 0,025481173 | monooxygenase activity                                   |
| Δhom2 | 8-day | 2573396 | up   | GO:0004497 | 0,025481173 | monooxygenase activity                                   |
| Δhom2 | 8-day | 2616590 | up   | GO:0004497 | 0,025481173 | monooxygenase activity                                   |
| Δhom2 | 8-day | 2628651 | up   | GO:0004497 | 0,025481173 | monooxygenase activity                                   |
| Δhom2 | 8-day | 2629864 | up   | GO:0004497 | 0,025481173 | monooxygenase activity                                   |
| Δhom2 | 8-day | 2633776 | up   | GO:0004497 | 0,025481173 | monooxygenase activity                                   |
| Δhom2 | 8-day | 2635870 | up   | GO:0004497 | 0,025481173 | monooxygenase activity                                   |
| Δhom2 | 8-day | 2637467 | up   | GO:0004497 | 0,025481173 | monooxygenase activity                                   |
| Δhom2 | 8-day | 2638282 | up   | GO:0004497 | 0,025481173 | monooxygenase activity                                   |
| Δhom2 | 8-day | 2638350 | up   | GO:0004497 | 0,025481173 | monooxygenase activity                                   |
| Δhom2 | 8-day | 2638355 | up   | GO:0004497 | 0,025481173 | monooxygenase activity                                   |
| Δhom2 | 8-day | 2640550 | up   | GO:0004497 | 0,025481173 | monooxygenase activity                                   |
| Δhom2 | 8-day | 2666440 | up   | GO:0004497 | 0,025481173 | monooxygenase activity                                   |
| Δhom2 | 8-day | 2703927 | up   | GO:0004497 | 0,025481173 | monooxygenase activity                                   |
| Δhom2 | 8-day | 2753029 | up   | GO:0004497 | 0,025481173 | monooxygenase activity                                   |
| Δhom2 | 8-day | 2343034 | up   | GO:0016614 | 0,025481173 | oxidoreductase activity, acting on CH-OH group of donors |
| Δhom2 | 8-day | 2607677 | up   | GO:0016614 | 0,025481173 | oxidoreductase activity, acting on CH-OH group of donors |
| Δhom2 | 8-day | 2638753 | up   | GO:0016614 | 0,025481173 | oxidoreductase activity, acting on CH-OH group of donors |
| Δhom2 | 8-day | 2643062 | up   | GO:0016614 | 0,025481173 | oxidoreductase activity, acting on CH-OH group of donors |
| Δhom2 | 8-day | 2663917 | up   | GO:0016614 | 0,025481173 | oxidoreductase activity, acting on CH-OH group of donors |
| Δhom2 | 8-day | 2666039 | up   | GO:0016614 | 0,025481173 | oxidoreductase activity, acting on CH-OH group of donors |
| Δhom2 | 8-day | 2693570 | up   | GO:0016614 | 0,025481173 | oxidoreductase activity, acting on CH-OH group of donors |
| Δhom2 | 8-day | 1131542 | down | GO:0004497 | 5,37E-07    | monooxygenase activity                                   |
| Δhom2 | 8-day | 1139445 | down | GO:0004497 | 5,37E-07    | monooxygenase activity                                   |

|       |       |         |      |            |          |                        |
|-------|-------|---------|------|------------|----------|------------------------|
| Δhom2 | 8-day | 1189794 | down | GO:0004497 | 5,37E-07 | monooxygenase activity |
| Δhom2 | 8-day | 2486680 | down | GO:0004497 | 5,37E-07 | monooxygenase activity |
| Δhom2 | 8-day | 2503471 | down | GO:0004497 | 5,37E-07 | monooxygenase activity |
| Δhom2 | 8-day | 2510618 | down | GO:0004497 | 5,37E-07 | monooxygenase activity |
| Δhom2 | 8-day | 2604231 | down | GO:0004497 | 5,37E-07 | monooxygenase activity |
| Δhom2 | 8-day | 2618455 | down | GO:0004497 | 5,37E-07 | monooxygenase activity |
| Δhom2 | 8-day | 2635487 | down | GO:0004497 | 5,37E-07 | monooxygenase activity |
| Δhom2 | 8-day | 2635869 | down | GO:0004497 | 5,37E-07 | monooxygenase activity |
| Δhom2 | 8-day | 2644430 | down | GO:0004497 | 5,37E-07 | monooxygenase activity |
| Δhom2 | 8-day | 2668568 | down | GO:0004497 | 5,37E-07 | monooxygenase activity |
| Δhom2 | 8-day | 2705258 | down | GO:0004497 | 5,37E-07 | monooxygenase activity |
| Δhom2 | 8-day | 256167  | down | GO:0006810 | 2,38E-06 | transport              |
| Δhom2 | 8-day | 1078940 | down | GO:0006810 | 2,38E-06 | transport              |
| Δhom2 | 8-day | 1129508 | down | GO:0006810 | 2,38E-06 | transport              |
| Δhom2 | 8-day | 1163017 | down | GO:0006810 | 2,38E-06 | transport              |
| Δhom2 | 8-day | 1171024 | down | GO:0006810 | 2,38E-06 | transport              |
| Δhom2 | 8-day | 1175357 | down | GO:0006810 | 2,38E-06 | transport              |
| Δhom2 | 8-day | 1179721 | down | GO:0006810 | 2,38E-06 | transport              |
| Δhom2 | 8-day | 1188719 | down | GO:0006810 | 2,38E-06 | transport              |
| Δhom2 | 8-day | 2510346 | down | GO:0006810 | 2,38E-06 | transport              |
| Δhom2 | 8-day | 2516374 | down | GO:0006810 | 2,38E-06 | transport              |
| Δhom2 | 8-day | 2543516 | down | GO:0006810 | 2,38E-06 | transport              |
| Δhom2 | 8-day | 2607662 | down | GO:0006810 | 2,38E-06 | transport              |
| Δhom2 | 8-day | 2608744 | down | GO:0006810 | 2,38E-06 | transport              |
| Δhom2 | 8-day | 2612474 | down | GO:0006810 | 2,38E-06 | transport              |
| Δhom2 | 8-day | 2613255 | down | GO:0006810 | 2,38E-06 | transport              |
| Δhom2 | 8-day | 2616961 | down | GO:0006810 | 2,38E-06 | transport              |
| Δhom2 | 8-day | 2623492 | down | GO:0006810 | 2,38E-06 | transport              |
| Δhom2 | 8-day | 2627703 | down | GO:0006810 | 2,38E-06 | transport              |
| Δhom2 | 8-day | 2636597 | down | GO:0006810 | 2,38E-06 | transport              |
| Δhom2 | 8-day | 2637509 | down | GO:0006810 | 2,38E-06 | transport              |
| Δhom2 | 8-day | 2641095 | down | GO:0006810 | 2,38E-06 | transport              |
| Δhom2 | 8-day | 2664286 | down | GO:0006810 | 2,38E-06 | transport              |
| Δhom2 | 8-day | 2669459 | down | GO:0006810 | 2,38E-06 | transport              |

|               |       |         |      |            |             |                    |
|---------------|-------|---------|------|------------|-------------|--------------------|
| $\Delta$ hom2 | 8-day | 2675831 | down | GO:0006810 | 2,38E-06    | transport          |
| $\Delta$ hom2 | 8-day | 2701571 | down | GO:0006810 | 2,38E-06    | transport          |
| $\Delta$ hom2 | 8-day | 2712060 | down | GO:0006810 | 2,38E-06    | transport          |
| $\Delta$ hom2 | 8-day | 1131542 | down | GO:0020037 | 0,000111408 | heme binding       |
| $\Delta$ hom2 | 8-day | 1139445 | down | GO:0020037 | 0,000111408 | heme binding       |
| $\Delta$ hom2 | 8-day | 1189794 | down | GO:0020037 | 0,000111408 | heme binding       |
| $\Delta$ hom2 | 8-day | 2486680 | down | GO:0020037 | 0,000111408 | heme binding       |
| $\Delta$ hom2 | 8-day | 2497674 | down | GO:0020037 | 0,000111408 | heme binding       |
| $\Delta$ hom2 | 8-day | 2510618 | down | GO:0020037 | 0,000111408 | heme binding       |
| $\Delta$ hom2 | 8-day | 2604231 | down | GO:0020037 | 0,000111408 | heme binding       |
| $\Delta$ hom2 | 8-day | 2609854 | down | GO:0020037 | 0,000111408 | heme binding       |
| $\Delta$ hom2 | 8-day | 2635487 | down | GO:0020037 | 0,000111408 | heme binding       |
| $\Delta$ hom2 | 8-day | 2635869 | down | GO:0020037 | 0,000111408 | heme binding       |
| $\Delta$ hom2 | 8-day | 2668568 | down | GO:0020037 | 0,000111408 | heme binding       |
| $\Delta$ hom2 | 8-day | 2705258 | down | GO:0020037 | 0,000111408 | heme binding       |
| $\Delta$ hom2 | 8-day | 1131542 | down | GO:0006118 | 0,000534277 | electron transport |
| $\Delta$ hom2 | 8-day | 1139445 | down | GO:0006118 | 0,000534277 | electron transport |
| $\Delta$ hom2 | 8-day | 1189794 | down | GO:0006118 | 0,000534277 | electron transport |
| $\Delta$ hom2 | 8-day | 2486680 | down | GO:0006118 | 0,000534277 | electron transport |
| $\Delta$ hom2 | 8-day | 2490518 | down | GO:0006118 | 0,000534277 | electron transport |
| $\Delta$ hom2 | 8-day | 2497674 | down | GO:0006118 | 0,000534277 | electron transport |
| $\Delta$ hom2 | 8-day | 2499521 | down | GO:0006118 | 0,000534277 | electron transport |
| $\Delta$ hom2 | 8-day | 2503471 | down | GO:0006118 | 0,000534277 | electron transport |
| $\Delta$ hom2 | 8-day | 2510618 | down | GO:0006118 | 0,000534277 | electron transport |
| $\Delta$ hom2 | 8-day | 2604231 | down | GO:0006118 | 0,000534277 | electron transport |
| $\Delta$ hom2 | 8-day | 2609831 | down | GO:0006118 | 0,000534277 | electron transport |
| $\Delta$ hom2 | 8-day | 2609854 | down | GO:0006118 | 0,000534277 | electron transport |
| $\Delta$ hom2 | 8-day | 2613466 | down | GO:0006118 | 0,000534277 | electron transport |
| $\Delta$ hom2 | 8-day | 2613481 | down | GO:0006118 | 0,000534277 | electron transport |
| $\Delta$ hom2 | 8-day | 2618455 | down | GO:0006118 | 0,000534277 | electron transport |
| $\Delta$ hom2 | 8-day | 2620726 | down | GO:0006118 | 0,000534277 | electron transport |
| $\Delta$ hom2 | 8-day | 2633167 | down | GO:0006118 | 0,000534277 | electron transport |
| $\Delta$ hom2 | 8-day | 2635487 | down | GO:0006118 | 0,000534277 | electron transport |
| $\Delta$ hom2 | 8-day | 2635869 | down | GO:0006118 | 0,000534277 | electron transport |

|       |       |         |      |            |             |                                   |
|-------|-------|---------|------|------------|-------------|-----------------------------------|
| Δhom2 | 8-day | 2637104 | down | GO:0006118 | 0,000534277 | electron transport                |
| Δhom2 | 8-day | 2639682 | down | GO:0006118 | 0,000534277 | electron transport                |
| Δhom2 | 8-day | 2644430 | down | GO:0006118 | 0,000534277 | electron transport                |
| Δhom2 | 8-day | 2668568 | down | GO:0006118 | 0,000534277 | electron transport                |
| Δhom2 | 8-day | 2705258 | down | GO:0006118 | 0,000534277 | electron transport                |
| Δhom2 | 8-day | 256167  | down | GO:0005215 | 0,000650959 | transporter activity              |
| Δhom2 | 8-day | 1129508 | down | GO:0005215 | 0,000650959 | transporter activity              |
| Δhom2 | 8-day | 1171024 | down | GO:0005215 | 0,000650959 | transporter activity              |
| Δhom2 | 8-day | 1175357 | down | GO:0005215 | 0,000650959 | transporter activity              |
| Δhom2 | 8-day | 1179721 | down | GO:0005215 | 0,000650959 | transporter activity              |
| Δhom2 | 8-day | 1188719 | down | GO:0005215 | 0,000650959 | transporter activity              |
| Δhom2 | 8-day | 2510346 | down | GO:0005215 | 0,000650959 | transporter activity              |
| Δhom2 | 8-day | 2516374 | down | GO:0005215 | 0,000650959 | transporter activity              |
| Δhom2 | 8-day | 2543516 | down | GO:0005215 | 0,000650959 | transporter activity              |
| Δhom2 | 8-day | 2607662 | down | GO:0005215 | 0,000650959 | transporter activity              |
| Δhom2 | 8-day | 2608744 | down | GO:0005215 | 0,000650959 | transporter activity              |
| Δhom2 | 8-day | 2612474 | down | GO:0005215 | 0,000650959 | transporter activity              |
| Δhom2 | 8-day | 2613255 | down | GO:0005215 | 0,000650959 | transporter activity              |
| Δhom2 | 8-day | 2616961 | down | GO:0005215 | 0,000650959 | transporter activity              |
| Δhom2 | 8-day | 2623492 | down | GO:0005215 | 0,000650959 | transporter activity              |
| Δhom2 | 8-day | 2627703 | down | GO:0005215 | 0,000650959 | transporter activity              |
| Δhom2 | 8-day | 2636597 | down | GO:0005215 | 0,000650959 | transporter activity              |
| Δhom2 | 8-day | 2637509 | down | GO:0005215 | 0,000650959 | transporter activity              |
| Δhom2 | 8-day | 2641095 | down | GO:0005215 | 0,000650959 | transporter activity              |
| Δhom2 | 8-day | 2664286 | down | GO:0005215 | 0,000650959 | transporter activity              |
| Δhom2 | 8-day | 2669459 | down | GO:0005215 | 0,000650959 | transporter activity              |
| Δhom2 | 8-day | 2701571 | down | GO:0005215 | 0,000650959 | transporter activity              |
| Δhom2 | 8-day | 2712060 | down | GO:0005215 | 0,000650959 | transporter activity              |
| Δhom2 | 8-day | 1139445 | down | GO:0050381 | 0,001012262 | unspecific monooxygenase activity |
| Δhom2 | 8-day | 2486680 | down | GO:0050381 | 0,001012262 | unspecific monooxygenase activity |
| Δhom2 | 8-day | 2510618 | down | GO:0050381 | 0,001012262 | unspecific monooxygenase activity |
| Δhom2 | 8-day | 2635869 | down | GO:0050381 | 0,001012262 | unspecific monooxygenase activity |
| Δhom2 | 8-day | 2705258 | down | GO:0050381 | 0,001012262 | unspecific monooxygenase activity |
| Δhom2 | 8-day | 1131542 | down | GO:0005506 | 0,001012262 | iron ion binding                  |

|       |       |         |      |            |             |                                                          |
|-------|-------|---------|------|------------|-------------|----------------------------------------------------------|
| Δhom2 | 8-day | 1139445 | down | GO:0005506 | 0,001012262 | iron ion binding                                         |
| Δhom2 | 8-day | 1189794 | down | GO:0005506 | 0,001012262 | iron ion binding                                         |
| Δhom2 | 8-day | 2312801 | down | GO:0005506 | 0,001012262 | iron ion binding                                         |
| Δhom2 | 8-day | 2486680 | down | GO:0005506 | 0,001012262 | iron ion binding                                         |
| Δhom2 | 8-day | 2497674 | down | GO:0005506 | 0,001012262 | iron ion binding                                         |
| Δhom2 | 8-day | 2510618 | down | GO:0005506 | 0,001012262 | iron ion binding                                         |
| Δhom2 | 8-day | 2604231 | down | GO:0005506 | 0,001012262 | iron ion binding                                         |
| Δhom2 | 8-day | 2618220 | down | GO:0005506 | 0,001012262 | iron ion binding                                         |
| Δhom2 | 8-day | 2628448 | down | GO:0005506 | 0,001012262 | iron ion binding                                         |
| Δhom2 | 8-day | 2635487 | down | GO:0005506 | 0,001012262 | iron ion binding                                         |
| Δhom2 | 8-day | 2635869 | down | GO:0005506 | 0,001012262 | iron ion binding                                         |
| Δhom2 | 8-day | 2668568 | down | GO:0005506 | 0,001012262 | iron ion binding                                         |
| Δhom2 | 8-day | 2705258 | down | GO:0005506 | 0,001012262 | iron ion binding                                         |
| Δhom2 | 8-day | 2675831 | down | GO:0006865 | 0,002614182 | amino acid transport                                     |
| Δhom2 | 8-day | 2675831 | down | GO:0015171 | 0,002614182 | amino acid transmembrane transporter activity            |
| Δhom2 | 8-day | 2592894 | down | GO:0016614 | 0,003051928 | oxidoreductase activity, acting on CH-OH group of donors |
| Δhom2 | 8-day | 2614510 | down | GO:0016614 | 0,003051928 | oxidoreductase activity, acting on CH-OH group of donors |
| Δhom2 | 8-day | 2642438 | down | GO:0016614 | 0,003051928 | oxidoreductase activity, acting on CH-OH group of donors |
| Δhom2 | 8-day | 2642607 | down | GO:0016614 | 0,003051928 | oxidoreductase activity, acting on CH-OH group of donors |
| Δhom2 | 8-day | 2643025 | down | GO:0016614 | 0,003051928 | oxidoreductase activity, acting on CH-OH group of donors |
| Δhom2 | 8-day | 2540746 | down | GO:0050660 | 0,003600851 | FAD binding                                              |
| Δhom2 | 8-day | 2592894 | down | GO:0050660 | 0,003600851 | FAD binding                                              |
| Δhom2 | 8-day | 2614510 | down | GO:0050660 | 0,003600851 | FAD binding                                              |
| Δhom2 | 8-day | 2623663 | down | GO:0050660 | 0,003600851 | FAD binding                                              |
| Δhom2 | 8-day | 2642438 | down | GO:0050660 | 0,003600851 | FAD binding                                              |
| Δhom2 | 8-day | 2642607 | down | GO:0050660 | 0,003600851 | FAD binding                                              |
| Δhom2 | 8-day | 2643025 | down | GO:0050660 | 0,003600851 | FAD binding                                              |
| Δhom2 | 8-day | 2614029 | down | GO:0005618 | 0,004956468 | cell wall                                                |
| Δhom2 | 8-day | 1175357 | down | GO:0016020 | 0,006783157 | membrane                                                 |
| Δhom2 | 8-day | 2516374 | down | GO:0016020 | 0,006783157 | membrane                                                 |
| Δhom2 | 8-day | 2543516 | down | GO:0016020 | 0,006783157 | membrane                                                 |
| Δhom2 | 8-day | 2608744 | down | GO:0016020 | 0,006783157 | membrane                                                 |
| Δhom2 | 8-day | 2612474 | down | GO:0016020 | 0,006783157 | membrane                                                 |
| Δhom2 | 8-day | 2613255 | down | GO:0016020 | 0,006783157 | membrane                                                 |



|       |       |         |      |            |             |                         |
|-------|-------|---------|------|------------|-------------|-------------------------|
| Δhom2 | 8-day | 2627703 | down | GO:0016020 | 0,006783157 | membrane                |
| Δhom2 | 8-day | 2629358 | down | GO:0016020 | 0,006783157 | membrane                |
| Δhom2 | 8-day | 2640999 | down | GO:0016020 | 0,006783157 | membrane                |
| Δhom2 | 8-day | 2641095 | down | GO:0016020 | 0,006783157 | membrane                |
| Δhom2 | 8-day | 2675646 | down | GO:0016020 | 0,006783157 | membrane                |
| Δhom2 | 8-day | 2675831 | down | GO:0016020 | 0,006783157 | membrane                |
| Δhom2 | 8-day | 2701571 | down | GO:0016020 | 0,006783157 | membrane                |
| Δhom2 | 8-day | 1156481 | down | GO:0016491 | 0,016084515 | oxidoreductase activity |
| Δhom2 | 8-day | 1189573 | down | GO:0016491 | 0,016084515 | oxidoreductase activity |
| Δhom2 | 8-day | 2312801 | down | GO:0016491 | 0,016084515 | oxidoreductase activity |
| Δhom2 | 8-day | 2490518 | down | GO:0016491 | 0,016084515 | oxidoreductase activity |
| Δhom2 | 8-day | 2495855 | down | GO:0016491 | 0,016084515 | oxidoreductase activity |
| Δhom2 | 8-day | 2497674 | down | GO:0016491 | 0,016084515 | oxidoreductase activity |
| Δhom2 | 8-day | 2499521 | down | GO:0016491 | 0,016084515 | oxidoreductase activity |
| Δhom2 | 8-day | 2503471 | down | GO:0016491 | 0,016084515 | oxidoreductase activity |
| Δhom2 | 8-day | 2507164 | down | GO:0016491 | 0,016084515 | oxidoreductase activity |
| Δhom2 | 8-day | 2515739 | down | GO:0016491 | 0,016084515 | oxidoreductase activity |
| Δhom2 | 8-day | 2515964 | down | GO:0016491 | 0,016084515 | oxidoreductase activity |
| Δhom2 | 8-day | 2518082 | down | GO:0016491 | 0,016084515 | oxidoreductase activity |
| Δhom2 | 8-day | 2538948 | down | GO:0016491 | 0,016084515 | oxidoreductase activity |
| Δhom2 | 8-day | 2540746 | down | GO:0016491 | 0,016084515 | oxidoreductase activity |
| Δhom2 | 8-day | 2591516 | down | GO:0016491 | 0,016084515 | oxidoreductase activity |
| Δhom2 | 8-day | 2601704 | down | GO:0016491 | 0,016084515 | oxidoreductase activity |
| Δhom2 | 8-day | 2606428 | down | GO:0016491 | 0,016084515 | oxidoreductase activity |
| Δhom2 | 8-day | 2606988 | down | GO:0016491 | 0,016084515 | oxidoreductase activity |
| Δhom2 | 8-day | 2608048 | down | GO:0016491 | 0,016084515 | oxidoreductase activity |
| Δhom2 | 8-day | 2609854 | down | GO:0016491 | 0,016084515 | oxidoreductase activity |
| Δhom2 | 8-day | 2611538 | down | GO:0016491 | 0,016084515 | oxidoreductase activity |
| Δhom2 | 8-day | 2613466 | down | GO:0016491 | 0,016084515 | oxidoreductase activity |
| Δhom2 | 8-day | 2613481 | down | GO:0016491 | 0,016084515 | oxidoreductase activity |
| Δhom2 | 8-day | 2615160 | down | GO:0016491 | 0,016084515 | oxidoreductase activity |
| Δhom2 | 8-day | 2616880 | down | GO:0016491 | 0,016084515 | oxidoreductase activity |
| Δhom2 | 8-day | 2618220 | down | GO:0016491 | 0,016084515 | oxidoreductase activity |
| Δhom2 | 8-day | 2618455 | down | GO:0016491 | 0,016084515 | oxidoreductase activity |

|               |       |         |      |            |             |                                                      |
|---------------|-------|---------|------|------------|-------------|------------------------------------------------------|
| $\Delta$ hom2 | 8-day | 2621873 | down | GO:0016491 | 0,016084515 | oxidoreductase activity                              |
| $\Delta$ hom2 | 8-day | 2623663 | down | GO:0016491 | 0,016084515 | oxidoreductase activity                              |
| $\Delta$ hom2 | 8-day | 2625917 | down | GO:0016491 | 0,016084515 | oxidoreductase activity                              |
| $\Delta$ hom2 | 8-day | 2629507 | down | GO:0016491 | 0,016084515 | oxidoreductase activity                              |
| $\Delta$ hom2 | 8-day | 2629526 | down | GO:0016491 | 0,016084515 | oxidoreductase activity                              |
| $\Delta$ hom2 | 8-day | 2633167 | down | GO:0016491 | 0,016084515 | oxidoreductase activity                              |
| $\Delta$ hom2 | 8-day | 2634450 | down | GO:0016491 | 0,016084515 | oxidoreductase activity                              |
| $\Delta$ hom2 | 8-day | 2637104 | down | GO:0016491 | 0,016084515 | oxidoreductase activity                              |
| $\Delta$ hom2 | 8-day | 2637755 | down | GO:0016491 | 0,016084515 | oxidoreductase activity                              |
| $\Delta$ hom2 | 8-day | 2639682 | down | GO:0016491 | 0,016084515 | oxidoreductase activity                              |
| $\Delta$ hom2 | 8-day | 2641506 | down | GO:0016491 | 0,016084515 | oxidoreductase activity                              |
| $\Delta$ hom2 | 8-day | 2642438 | down | GO:0016491 | 0,016084515 | oxidoreductase activity                              |
| $\Delta$ hom2 | 8-day | 2644430 | down | GO:0016491 | 0,016084515 | oxidoreductase activity                              |
| $\Delta$ hom2 | 8-day | 2685505 | down | GO:0016491 | 0,016084515 | oxidoreductase activity                              |
| $\Delta$ hom2 | 8-day | 2614510 | down | GO:0006066 | 0,019346511 | alcohol metabolic process                            |
| $\Delta$ hom2 | 8-day | 2642607 | down | GO:0006066 | 0,019346511 | alcohol metabolic process                            |
| $\Delta$ hom2 | 8-day | 2643025 | down | GO:0006066 | 0,019346511 | alcohol metabolic process                            |
| $\Delta$ hom2 | 8-day | 2614510 | down | GO:0008812 | 0,019346511 | choline dehydrogenase activity                       |
| $\Delta$ hom2 | 8-day | 2642607 | down | GO:0008812 | 0,019346511 | choline dehydrogenase activity                       |
| $\Delta$ hom2 | 8-day | 2643025 | down | GO:0008812 | 0,019346511 | choline dehydrogenase activity                       |
| $\Delta$ wc1  | 8-day | 2643740 | up   | GO:0004553 | 0,000587315 | hydrolase activity, hydrolyzing O-glycosyl compounds |
| $\Delta$ wc1  | 8-day | 2607659 | up   | GO:0008733 | 0,000587315 | L-arabinose isomerase activity                       |
| $\Delta$ wc1  | 8-day | 2514546 | up   | GO:0005975 | 0,000587315 | carbohydrate metabolic process                       |
| $\Delta$ wc1  | 8-day | 2609013 | up   | GO:0005975 | 0,000587315 | carbohydrate metabolic process                       |
| $\Delta$ wc1  | 8-day | 2620185 | up   | GO:0005975 | 0,000587315 | carbohydrate metabolic process                       |
| $\Delta$ wc1  | 8-day | 2643740 | up   | GO:0005975 | 0,000587315 | carbohydrate metabolic process                       |
| $\Delta$ wc1  | 8-day | 2645945 | up   | GO:0005975 | 0,000587315 | carbohydrate metabolic process                       |
| $\Delta$ wc1  | 8-day | 2607659 | up   | GO:0008643 | 0,000587315 | carbohydrate transport                               |
| $\Delta$ wc1  | 8-day | 2607659 | up   | GO:0005351 | 0,000785667 | sugar:hydrogen symporter activity                    |
| $\Delta$ wc1  | 8-day | 1120318 | up   | GO:0005506 | 0,000785667 | iron ion binding                                     |
| $\Delta$ wc1  | 8-day | 2364606 | up   | GO:0005506 | 0,000785667 | iron ion binding                                     |
| $\Delta$ wc1  | 8-day | 2491624 | up   | GO:0005506 | 0,000785667 | iron ion binding                                     |
| $\Delta$ wc1  | 8-day | 2501258 | up   | GO:0005506 | 0,000785667 | iron ion binding                                     |
| $\Delta$ wc1  | 8-day | 2616590 | up   | GO:0005506 | 0,000785667 | iron ion binding                                     |

|              |       |         |    |            |             |                                                          |
|--------------|-------|---------|----|------------|-------------|----------------------------------------------------------|
| $\Delta$ wc1 | 8-day | 2617060 | up | GO:0005506 | 0,000785667 | iron ion binding                                         |
| $\Delta$ wc1 | 8-day | 2623122 | up | GO:0005506 | 0,000785667 | iron ion binding                                         |
| $\Delta$ wc1 | 8-day | 2633776 | up | GO:0005506 | 0,000785667 | iron ion binding                                         |
| $\Delta$ wc1 | 8-day | 2635870 | up | GO:0005506 | 0,000785667 | iron ion binding                                         |
| $\Delta$ wc1 | 8-day | 2666440 | up | GO:0005506 | 0,000785667 | iron ion binding                                         |
| $\Delta$ wc1 | 8-day | 2753029 | up | GO:0005506 | 0,000785667 | iron ion binding                                         |
| $\Delta$ wc1 | 8-day | 1120318 | up | GO:0006118 | 0,002748685 | electron transport                                       |
| $\Delta$ wc1 | 8-day | 1215660 | up | GO:0006118 | 0,002748685 | electron transport                                       |
| $\Delta$ wc1 | 8-day | 1342670 | up | GO:0006118 | 0,002748685 | electron transport                                       |
| $\Delta$ wc1 | 8-day | 2364606 | up | GO:0006118 | 0,002748685 | electron transport                                       |
| $\Delta$ wc1 | 8-day | 2490194 | up | GO:0006118 | 0,002748685 | electron transport                                       |
| $\Delta$ wc1 | 8-day | 2491624 | up | GO:0006118 | 0,002748685 | electron transport                                       |
| $\Delta$ wc1 | 8-day | 2501258 | up | GO:0006118 | 0,002748685 | electron transport                                       |
| $\Delta$ wc1 | 8-day | 2573393 | up | GO:0006118 | 0,002748685 | electron transport                                       |
| $\Delta$ wc1 | 8-day | 2573396 | up | GO:0006118 | 0,002748685 | electron transport                                       |
| $\Delta$ wc1 | 8-day | 2613444 | up | GO:0006118 | 0,002748685 | electron transport                                       |
| $\Delta$ wc1 | 8-day | 2616557 | up | GO:0006118 | 0,002748685 | electron transport                                       |
| $\Delta$ wc1 | 8-day | 2616590 | up | GO:0006118 | 0,002748685 | electron transport                                       |
| $\Delta$ wc1 | 8-day | 2623122 | up | GO:0006118 | 0,002748685 | electron transport                                       |
| $\Delta$ wc1 | 8-day | 2625730 | up | GO:0006118 | 0,002748685 | electron transport                                       |
| $\Delta$ wc1 | 8-day | 2633776 | up | GO:0006118 | 0,002748685 | electron transport                                       |
| $\Delta$ wc1 | 8-day | 2635870 | up | GO:0006118 | 0,002748685 | electron transport                                       |
| $\Delta$ wc1 | 8-day | 2666440 | up | GO:0006118 | 0,002748685 | electron transport                                       |
| $\Delta$ wc1 | 8-day | 2671376 | up | GO:0006118 | 0,002748685 | electron transport                                       |
| $\Delta$ wc1 | 8-day | 2703927 | up | GO:0006118 | 0,002748685 | electron transport                                       |
| $\Delta$ wc1 | 8-day | 2753029 | up | GO:0006118 | 0,002748685 | electron transport                                       |
| $\Delta$ wc1 | 8-day | 2638753 | up | GO:0016614 | 0,002748685 | oxidoreductase activity, acting on CH-OH group of donors |
| $\Delta$ wc1 | 8-day | 2643062 | up | GO:0016614 | 0,002748685 | oxidoreductase activity, acting on CH-OH group of donors |
| $\Delta$ wc1 | 8-day | 2663917 | up | GO:0016614 | 0,002748685 | oxidoreductase activity, acting on CH-OH group of donors |
| $\Delta$ wc1 | 8-day | 2693570 | up | GO:0016614 | 0,002748685 | oxidoreductase activity, acting on CH-OH group of donors |
| $\Delta$ wc1 | 8-day | 2643062 | up | GO:0006066 | 0,003509835 | alcohol metabolic process                                |
| $\Delta$ wc1 | 8-day | 2693570 | up | GO:0006066 | 0,003509835 | alcohol metabolic process                                |
| $\Delta$ wc1 | 8-day | 2643062 | up | GO:0008812 | 0,003509835 | choline dehydrogenase activity                           |
| $\Delta$ wc1 | 8-day | 2693570 | up | GO:0008812 | 0,003509835 | choline dehydrogenase activity                           |

|              |       |         |    |            |             |                                   |
|--------------|-------|---------|----|------------|-------------|-----------------------------------|
| $\Delta$ wc1 | 8-day | 1120318 | up | GO:0050381 | 0,003882954 | unspecific monooxygenase activity |
| $\Delta$ wc1 | 8-day | 2491624 | up | GO:0050381 | 0,003882954 | unspecific monooxygenase activity |
| $\Delta$ wc1 | 8-day | 2633776 | up | GO:0050381 | 0,003882954 | unspecific monooxygenase activity |
| $\Delta$ wc1 | 8-day | 2666440 | up | GO:0050381 | 0,003882954 | unspecific monooxygenase activity |
| $\Delta$ wc1 | 8-day | 2753029 | up | GO:0050381 | 0,003882954 | unspecific monooxygenase activity |
| $\Delta$ wc1 | 8-day | 1120318 | up | GO:0004497 | 0,007651462 | monooxygenase activity            |
| $\Delta$ wc1 | 8-day | 1342670 | up | GO:0004497 | 0,007651462 | monooxygenase activity            |
| $\Delta$ wc1 | 8-day | 2364606 | up | GO:0004497 | 0,007651462 | monooxygenase activity            |
| $\Delta$ wc1 | 8-day | 2490194 | up | GO:0004497 | 0,007651462 | monooxygenase activity            |
| $\Delta$ wc1 | 8-day | 2491624 | up | GO:0004497 | 0,007651462 | monooxygenase activity            |
| $\Delta$ wc1 | 8-day | 2501258 | up | GO:0004497 | 0,007651462 | monooxygenase activity            |
| $\Delta$ wc1 | 8-day | 2573393 | up | GO:0004497 | 0,007651462 | monooxygenase activity            |
| $\Delta$ wc1 | 8-day | 2573396 | up | GO:0004497 | 0,007651462 | monooxygenase activity            |
| $\Delta$ wc1 | 8-day | 2616590 | up | GO:0004497 | 0,007651462 | monooxygenase activity            |
| $\Delta$ wc1 | 8-day | 2623122 | up | GO:0004497 | 0,007651462 | monooxygenase activity            |
| $\Delta$ wc1 | 8-day | 2633776 | up | GO:0004497 | 0,007651462 | monooxygenase activity            |
| $\Delta$ wc1 | 8-day | 2635870 | up | GO:0004497 | 0,007651462 | monooxygenase activity            |
| $\Delta$ wc1 | 8-day | 2666440 | up | GO:0004497 | 0,007651462 | monooxygenase activity            |
| $\Delta$ wc1 | 8-day | 2703927 | up | GO:0004497 | 0,007651462 | monooxygenase activity            |
| $\Delta$ wc1 | 8-day | 2753029 | up | GO:0004497 | 0,007651462 | monooxygenase activity            |
| $\Delta$ wc1 | 8-day | 1194451 | up | GO:0016491 | 0,007795772 | oxidoreductase activity           |
| $\Delta$ wc1 | 8-day | 1342670 | up | GO:0016491 | 0,007795772 | oxidoreductase activity           |
| $\Delta$ wc1 | 8-day | 2487936 | up | GO:0016491 | 0,007795772 | oxidoreductase activity           |
| $\Delta$ wc1 | 8-day | 2490194 | up | GO:0016491 | 0,007795772 | oxidoreductase activity           |
| $\Delta$ wc1 | 8-day | 2501673 | up | GO:0016491 | 0,007795772 | oxidoreductase activity           |
| $\Delta$ wc1 | 8-day | 2506447 | up | GO:0016491 | 0,007795772 | oxidoreductase activity           |
| $\Delta$ wc1 | 8-day | 2506612 | up | GO:0016491 | 0,007795772 | oxidoreductase activity           |
| $\Delta$ wc1 | 8-day | 2524219 | up | GO:0016491 | 0,007795772 | oxidoreductase activity           |
| $\Delta$ wc1 | 8-day | 2573393 | up | GO:0016491 | 0,007795772 | oxidoreductase activity           |
| $\Delta$ wc1 | 8-day | 2573396 | up | GO:0016491 | 0,007795772 | oxidoreductase activity           |
| $\Delta$ wc1 | 8-day | 2606041 | up | GO:0016491 | 0,007795772 | oxidoreductase activity           |
| $\Delta$ wc1 | 8-day | 2611263 | up | GO:0016491 | 0,007795772 | oxidoreductase activity           |
| $\Delta$ wc1 | 8-day | 2613444 | up | GO:0016491 | 0,007795772 | oxidoreductase activity           |
| $\Delta$ wc1 | 8-day | 2614455 | up | GO:0016491 | 0,007795772 | oxidoreductase activity           |

|      |       |         |    |            |             |                         |
|------|-------|---------|----|------------|-------------|-------------------------|
| Δwc1 | 8-day | 2616557 | up | GO:0016491 | 0,007795772 | oxidoreductase activity |
| Δwc1 | 8-day | 2617060 | up | GO:0016491 | 0,007795772 | oxidoreductase activity |
| Δwc1 | 8-day | 2623957 | up | GO:0016491 | 0,007795772 | oxidoreductase activity |
| Δwc1 | 8-day | 2625836 | up | GO:0016491 | 0,007795772 | oxidoreductase activity |
| Δwc1 | 8-day | 2630033 | up | GO:0016491 | 0,007795772 | oxidoreductase activity |
| Δwc1 | 8-day | 2632193 | up | GO:0016491 | 0,007795772 | oxidoreductase activity |
| Δwc1 | 8-day | 2634619 | up | GO:0016491 | 0,007795772 | oxidoreductase activity |
| Δwc1 | 8-day | 2636220 | up | GO:0016491 | 0,007795772 | oxidoreductase activity |
| Δwc1 | 8-day | 2636221 | up | GO:0016491 | 0,007795772 | oxidoreductase activity |
| Δwc1 | 8-day | 2638445 | up | GO:0016491 | 0,007795772 | oxidoreductase activity |
| Δwc1 | 8-day | 2638753 | up | GO:0016491 | 0,007795772 | oxidoreductase activity |
| Δwc1 | 8-day | 2640123 | up | GO:0016491 | 0,007795772 | oxidoreductase activity |
| Δwc1 | 8-day | 2671376 | up | GO:0016491 | 0,007795772 | oxidoreductase activity |
| Δwc1 | 8-day | 2681649 | up | GO:0016491 | 0,007795772 | oxidoreductase activity |
| Δwc1 | 8-day | 2691273 | up | GO:0016491 | 0,007795772 | oxidoreductase activity |
| Δwc1 | 8-day | 2703927 | up | GO:0016491 | 0,007795772 | oxidoreductase activity |
| Δwc1 | 8-day | 2713107 | up | GO:0016491 | 0,007795772 | oxidoreductase activity |
| Δwc1 | 8-day | 2748659 | up | GO:0016491 | 0,007795772 | oxidoreductase activity |
| Δwc1 | 8-day | 2508421 | up | GO:0005215 | 0,007795772 | transporter activity    |
| Δwc1 | 8-day | 2607659 | up | GO:0005215 | 0,007795772 | transporter activity    |
| Δwc1 | 8-day | 2616961 | up | GO:0005215 | 0,007795772 | transporter activity    |
| Δwc1 | 8-day | 2617636 | up | GO:0005215 | 0,007795772 | transporter activity    |
| Δwc1 | 8-day | 2618842 | up | GO:0005215 | 0,007795772 | transporter activity    |
| Δwc1 | 8-day | 2620170 | up | GO:0005215 | 0,007795772 | transporter activity    |
| Δwc1 | 8-day | 2622931 | up | GO:0005215 | 0,007795772 | transporter activity    |
| Δwc1 | 8-day | 2628098 | up | GO:0005215 | 0,007795772 | transporter activity    |
| Δwc1 | 8-day | 2628982 | up | GO:0005215 | 0,007795772 | transporter activity    |
| Δwc1 | 8-day | 2631348 | up | GO:0005215 | 0,007795772 | transporter activity    |
| Δwc1 | 8-day | 2632105 | up | GO:0005215 | 0,007795772 | transporter activity    |
| Δwc1 | 8-day | 2637652 | up | GO:0005215 | 0,007795772 | transporter activity    |
| Δwc1 | 8-day | 1120318 | up | GO:0020037 | 0,009216473 | heme binding            |
| Δwc1 | 8-day | 2364606 | up | GO:0020037 | 0,009216473 | heme binding            |
| Δwc1 | 8-day | 2491624 | up | GO:0020037 | 0,009216473 | heme binding            |
| Δwc1 | 8-day | 2501258 | up | GO:0020037 | 0,009216473 | heme binding            |

|              |       |         |    |            |             |                                                                       |
|--------------|-------|---------|----|------------|-------------|-----------------------------------------------------------------------|
| $\Delta$ wc1 | 8-day | 2608091 | up | GO:0020037 | 0,009216473 | heme binding                                                          |
| $\Delta$ wc1 | 8-day | 2616590 | up | GO:0020037 | 0,009216473 | heme binding                                                          |
| $\Delta$ wc1 | 8-day | 2623122 | up | GO:0020037 | 0,009216473 | heme binding                                                          |
| $\Delta$ wc1 | 8-day | 2633776 | up | GO:0020037 | 0,009216473 | heme binding                                                          |
| $\Delta$ wc1 | 8-day | 2635870 | up | GO:0020037 | 0,009216473 | heme binding                                                          |
| $\Delta$ wc1 | 8-day | 2666440 | up | GO:0020037 | 0,009216473 | heme binding                                                          |
| $\Delta$ wc1 | 8-day | 2673121 | up | GO:0020037 | 0,009216473 | heme binding                                                          |
| $\Delta$ wc1 | 8-day | 2753029 | up | GO:0020037 | 0,009216473 | heme binding                                                          |
| $\Delta$ wc1 | 8-day | 2620185 | up | GO:0016810 | 0,012144163 | hydrolase activity, acting on carbon-nitrogen (but not peptide) bonds |
| $\Delta$ wc1 | 8-day | 2633738 | up | GO:0016810 | 0,012144163 | hydrolase activity, acting on carbon-nitrogen (but not peptide) bonds |
| $\Delta$ wc1 | 8-day | 48473   | up | GO:0003824 | 0,013358637 | catalytic activity                                                    |
| $\Delta$ wc1 | 8-day | 2368049 | up | GO:0003824 | 0,013358637 | catalytic activity                                                    |
| $\Delta$ wc1 | 8-day | 2502008 | up | GO:0003824 | 0,013358637 | catalytic activity                                                    |
| $\Delta$ wc1 | 8-day | 2506635 | up | GO:0003824 | 0,013358637 | catalytic activity                                                    |
| $\Delta$ wc1 | 8-day | 2514546 | up | GO:0003824 | 0,013358637 | catalytic activity                                                    |
| $\Delta$ wc1 | 8-day | 2594114 | up | GO:0003824 | 0,013358637 | catalytic activity                                                    |
| $\Delta$ wc1 | 8-day | 2606333 | up | GO:0003824 | 0,013358637 | catalytic activity                                                    |
| $\Delta$ wc1 | 8-day | 2614455 | up | GO:0003824 | 0,013358637 | catalytic activity                                                    |
| $\Delta$ wc1 | 8-day | 2616512 | up | GO:0003824 | 0,013358637 | catalytic activity                                                    |
| $\Delta$ wc1 | 8-day | 2620185 | up | GO:0003824 | 0,013358637 | catalytic activity                                                    |
| $\Delta$ wc1 | 8-day | 2621626 | up | GO:0003824 | 0,013358637 | catalytic activity                                                    |
| $\Delta$ wc1 | 8-day | 2623957 | up | GO:0003824 | 0,013358637 | catalytic activity                                                    |
| $\Delta$ wc1 | 8-day | 2626172 | up | GO:0003824 | 0,013358637 | catalytic activity                                                    |
| $\Delta$ wc1 | 8-day | 2626529 | up | GO:0003824 | 0,013358637 | catalytic activity                                                    |
| $\Delta$ wc1 | 8-day | 2631920 | up | GO:0003824 | 0,013358637 | catalytic activity                                                    |
| $\Delta$ wc1 | 8-day | 2632193 | up | GO:0003824 | 0,013358637 | catalytic activity                                                    |
| $\Delta$ wc1 | 8-day | 2636220 | up | GO:0003824 | 0,013358637 | catalytic activity                                                    |
| $\Delta$ wc1 | 8-day | 2636221 | up | GO:0003824 | 0,013358637 | catalytic activity                                                    |
| $\Delta$ wc1 | 8-day | 2637388 | up | GO:0003824 | 0,013358637 | catalytic activity                                                    |
| $\Delta$ wc1 | 8-day | 2638445 | up | GO:0003824 | 0,013358637 | catalytic activity                                                    |
| $\Delta$ wc1 | 8-day | 2638446 | up | GO:0003824 | 0,013358637 | catalytic activity                                                    |
| $\Delta$ wc1 | 8-day | 2640123 | up | GO:0003824 | 0,013358637 | catalytic activity                                                    |

|      |       |         |      |            |             |                             |
|------|-------|---------|------|------------|-------------|-----------------------------|
| Δwc1 | 8-day | 2681649 | up   | GO:0003824 | 0,013358637 | catalytic activity          |
| Δwc1 | 8-day | 2682272 | up   | GO:0003824 | 0,013358637 | catalytic activity          |
| Δwc1 | 8-day | 2748659 | up   | GO:0003824 | 0,013358637 | catalytic activity          |
| Δwc1 | 8-day | 1174869 | up   | GO:0005524 | 0,018073482 | ATP binding                 |
| Δwc1 | 8-day | 2279823 | up   | GO:0005524 | 0,018073482 | ATP binding                 |
| Δwc1 | 8-day | 2621626 | up   | GO:0005524 | 0,018073482 | ATP binding                 |
| Δwc1 | 8-day | 2623809 | up   | GO:0005524 | 0,018073482 | ATP binding                 |
| Δwc1 | 8-day | 2645675 | up   | GO:0005524 | 0,018073482 | ATP binding                 |
| Δwc1 | 8-day | 2675859 | up   | GO:0005524 | 0,018073482 | ATP binding                 |
| Δwc1 | 8-day | 2693043 | up   | GO:0005524 | 0,018073482 | ATP binding                 |
| Δwc1 | 8-day | 2693940 | up   | GO:0005524 | 0,018073482 | ATP binding                 |
| Δwc1 | 8-day | 2727986 | up   | GO:0005524 | 0,018073482 | ATP binding                 |
| Δwc1 | 8-day | 2638753 | up   | GO:0050660 | 0,027550831 | FAD binding                 |
| Δwc1 | 8-day | 2640123 | up   | GO:0050660 | 0,027550831 | FAD binding                 |
| Δwc1 | 8-day | 2643062 | up   | GO:0050660 | 0,027550831 | FAD binding                 |
| Δwc1 | 8-day | 2663917 | up   | GO:0050660 | 0,027550831 | FAD binding                 |
| Δwc1 | 8-day | 2693570 | up   | GO:0050660 | 0,027550831 | FAD binding                 |
| Δwc1 | 8-day | 2748659 | up   | GO:0050660 | 0,027550831 | FAD binding                 |
| Δwc1 | 8-day | 2560780 | up   | GO:0030170 | 0,027550831 | pyridoxal phosphate binding |
| Δwc1 | 8-day | 2606037 | up   | GO:0030170 | 0,027550831 | pyridoxal phosphate binding |
| Δwc1 | 8-day | 2632714 | up   | GO:0030170 | 0,027550831 | pyridoxal phosphate binding |
| Δwc1 | 8-day | 1189573 | down | GO:0016491 | 0,00694302  | oxidoreductase activity     |
| Δwc1 | 8-day | 2312801 | down | GO:0016491 | 0,00694302  | oxidoreductase activity     |
| Δwc1 | 8-day | 2483752 | down | GO:0016491 | 0,00694302  | oxidoreductase activity     |
| Δwc1 | 8-day | 2490518 | down | GO:0016491 | 0,00694302  | oxidoreductase activity     |
| Δwc1 | 8-day | 2497674 | down | GO:0016491 | 0,00694302  | oxidoreductase activity     |
| Δwc1 | 8-day | 2499521 | down | GO:0016491 | 0,00694302  | oxidoreductase activity     |
| Δwc1 | 8-day | 2507164 | down | GO:0016491 | 0,00694302  | oxidoreductase activity     |
| Δwc1 | 8-day | 2515739 | down | GO:0016491 | 0,00694302  | oxidoreductase activity     |
| Δwc1 | 8-day | 2516444 | down | GO:0016491 | 0,00694302  | oxidoreductase activity     |
| Δwc1 | 8-day | 2571870 | down | GO:0016491 | 0,00694302  | oxidoreductase activity     |
| Δwc1 | 8-day | 2591516 | down | GO:0016491 | 0,00694302  | oxidoreductase activity     |
| Δwc1 | 8-day | 2606988 | down | GO:0016491 | 0,00694302  | oxidoreductase activity     |
| Δwc1 | 8-day | 2608048 | down | GO:0016491 | 0,00694302  | oxidoreductase activity     |

|      |       |         |      |            |             |                                               |
|------|-------|---------|------|------------|-------------|-----------------------------------------------|
| Δwc1 | 8-day | 2611538 | down | GO:0016491 | 0,00694302  | oxidoreductase activity                       |
| Δwc1 | 8-day | 2615160 | down | GO:0016491 | 0,00694302  | oxidoreductase activity                       |
| Δwc1 | 8-day | 2616880 | down | GO:0016491 | 0,00694302  | oxidoreductase activity                       |
| Δwc1 | 8-day | 2616916 | down | GO:0016491 | 0,00694302  | oxidoreductase activity                       |
| Δwc1 | 8-day | 2618220 | down | GO:0016491 | 0,00694302  | oxidoreductase activity                       |
| Δwc1 | 8-day | 2623663 | down | GO:0016491 | 0,00694302  | oxidoreductase activity                       |
| Δwc1 | 8-day | 2625917 | down | GO:0016491 | 0,00694302  | oxidoreductase activity                       |
| Δwc1 | 8-day | 2629507 | down | GO:0016491 | 0,00694302  | oxidoreductase activity                       |
| Δwc1 | 8-day | 2629850 | down | GO:0016491 | 0,00694302  | oxidoreductase activity                       |
| Δwc1 | 8-day | 2630590 | down | GO:0016491 | 0,00694302  | oxidoreductase activity                       |
| Δwc1 | 8-day | 2633167 | down | GO:0016491 | 0,00694302  | oxidoreductase activity                       |
| Δwc1 | 8-day | 2637755 | down | GO:0016491 | 0,00694302  | oxidoreductase activity                       |
| Δwc1 | 8-day | 2639682 | down | GO:0016491 | 0,00694302  | oxidoreductase activity                       |
| Δwc1 | 8-day | 2641520 | down | GO:0016491 | 0,00694302  | oxidoreductase activity                       |
| Δwc1 | 8-day | 2661224 | down | GO:0016491 | 0,00694302  | oxidoreductase activity                       |
| Δwc1 | 8-day | 2705421 | down | GO:0016491 | 0,00694302  | oxidoreductase activity                       |
| Δwc1 | 8-day | 1131542 | down | GO:0004497 | 0,00694302  | monooxygenase activity                        |
| Δwc1 | 8-day | 1193647 | down | GO:0004497 | 0,00694302  | monooxygenase activity                        |
| Δwc1 | 8-day | 2616301 | down | GO:0004497 | 0,00694302  | monooxygenase activity                        |
| Δwc1 | 8-day | 2620407 | down | GO:0004497 | 0,00694302  | monooxygenase activity                        |
| Δwc1 | 8-day | 2629864 | down | GO:0004497 | 0,00694302  | monooxygenase activity                        |
| Δwc1 | 8-day | 2632925 | down | GO:0004497 | 0,00694302  | monooxygenase activity                        |
| Δwc1 | 8-day | 2635487 | down | GO:0004497 | 0,00694302  | monooxygenase activity                        |
| Δwc1 | 8-day | 2636544 | down | GO:0004497 | 0,00694302  | monooxygenase activity                        |
| Δwc1 | 8-day | 2638355 | down | GO:0004497 | 0,00694302  | monooxygenase activity                        |
| Δwc1 | 8-day | 2668568 | down | GO:0004497 | 0,00694302  | monooxygenase activity                        |
| Δwc1 | 8-day | 2703966 | down | GO:0004497 | 0,00694302  | monooxygenase activity                        |
| Δwc1 | 8-day | 2705258 | down | GO:0004497 | 0,00694302  | monooxygenase activity                        |
| Δwc1 | 8-day | 2735179 | down | GO:0004497 | 0,00694302  | monooxygenase activity                        |
| Δwc1 | 8-day | 2675831 | down | GO:0015171 | 0,009265003 | amino acid transmembrane transporter activity |
| Δwc1 | 8-day | 2675831 | down | GO:0006865 | 0,009265003 | amino acid transport                          |
| Δwc1 | 8-day | 2629603 | down | GO:0005199 | 0,018915599 | structural constituent of cell wall           |
| Δwc1 | 8-day | 2629603 | down | GO:0005618 | 0,021849425 | cell wall                                     |
| Δwc1 | 8-day | 2577992 | down | GO:0004194 | 0,023576008 | pepsin A activity                             |



|      |       |         |      |            |             |                    |
|------|-------|---------|------|------------|-------------|--------------------|
| Δwc1 | 8-day | 68300   | down | GO:0006810 | 0,023576008 | transport          |
| Δwc1 | 8-day | 2283957 | down | GO:0006810 | 0,023576008 | transport          |
| Δwc1 | 8-day | 2515031 | down | GO:0006810 | 0,023576008 | transport          |
| Δwc1 | 8-day | 2516374 | down | GO:0006810 | 0,023576008 | transport          |
| Δwc1 | 8-day | 2543516 | down | GO:0006810 | 0,023576008 | transport          |
| Δwc1 | 8-day | 2550918 | down | GO:0006810 | 0,023576008 | transport          |
| Δwc1 | 8-day | 2611816 | down | GO:0006810 | 0,023576008 | transport          |
| Δwc1 | 8-day | 2613255 | down | GO:0006810 | 0,023576008 | transport          |
| Δwc1 | 8-day | 2617729 | down | GO:0006810 | 0,023576008 | transport          |
| Δwc1 | 8-day | 2623492 | down | GO:0006810 | 0,023576008 | transport          |
| Δwc1 | 8-day | 2627703 | down | GO:0006810 | 0,023576008 | transport          |
| Δwc1 | 8-day | 2636597 | down | GO:0006810 | 0,023576008 | transport          |
| Δwc1 | 8-day | 2661224 | down | GO:0006810 | 0,023576008 | transport          |
| Δwc1 | 8-day | 2669459 | down | GO:0006810 | 0,023576008 | transport          |
| Δwc1 | 8-day | 2675831 | down | GO:0006810 | 0,023576008 | transport          |
| Δwc1 | 8-day | 2701571 | down | GO:0006810 | 0,023576008 | transport          |
| Δwc1 | 8-day | 2712060 | down | GO:0006810 | 0,023576008 | transport          |
| Δwc1 | 8-day | 1131542 | down | GO:0006118 | 0,028913489 | electron transport |
| Δwc1 | 8-day | 1193647 | down | GO:0006118 | 0,028913489 | electron transport |
| Δwc1 | 8-day | 2490518 | down | GO:0006118 | 0,028913489 | electron transport |
| Δwc1 | 8-day | 2497674 | down | GO:0006118 | 0,028913489 | electron transport |
| Δwc1 | 8-day | 2499521 | down | GO:0006118 | 0,028913489 | electron transport |
| Δwc1 | 8-day | 2507628 | down | GO:0006118 | 0,028913489 | electron transport |
| Δwc1 | 8-day | 2571870 | down | GO:0006118 | 0,028913489 | electron transport |
| Δwc1 | 8-day | 2616301 | down | GO:0006118 | 0,028913489 | electron transport |
| Δwc1 | 8-day | 2620407 | down | GO:0006118 | 0,028913489 | electron transport |
| Δwc1 | 8-day | 2620726 | down | GO:0006118 | 0,028913489 | electron transport |
| Δwc1 | 8-day | 2629850 | down | GO:0006118 | 0,028913489 | electron transport |
| Δwc1 | 8-day | 2629864 | down | GO:0006118 | 0,028913489 | electron transport |
| Δwc1 | 8-day | 2632925 | down | GO:0006118 | 0,028913489 | electron transport |
| Δwc1 | 8-day | 2633167 | down | GO:0006118 | 0,028913489 | electron transport |
| Δwc1 | 8-day | 2635487 | down | GO:0006118 | 0,028913489 | electron transport |
| Δwc1 | 8-day | 2636544 | down | GO:0006118 | 0,028913489 | electron transport |
| Δwc1 | 8-day | 2638355 | down | GO:0006118 | 0,028913489 | electron transport |

|              |       |         |      |            |             |                                                      |
|--------------|-------|---------|------|------------|-------------|------------------------------------------------------|
| $\Delta$ wc1 | 8-day | 2639682 | down | GO:0006118 | 0,028913489 | electron transport                                   |
| $\Delta$ wc1 | 8-day | 2668568 | down | GO:0006118 | 0,028913489 | electron transport                                   |
| $\Delta$ wc1 | 8-day | 2703966 | down | GO:0006118 | 0,028913489 | electron transport                                   |
| $\Delta$ wc1 | 8-day | 2705258 | down | GO:0006118 | 0,028913489 | electron transport                                   |
| $\Delta$ wc1 | 8-day | 2735179 | down | GO:0006118 | 0,028913489 | electron transport                                   |
| $\Delta$ wc2 | 8-day | 66483   | up   | GO:0005975 | 1,23E-07    | carbohydrate metabolic process                       |
| $\Delta$ wc2 | 8-day | 85210   | up   | GO:0005975 | 1,23E-07    | carbohydrate metabolic process                       |
| $\Delta$ wc2 | 8-day | 2493241 | up   | GO:0005975 | 1,23E-07    | carbohydrate metabolic process                       |
| $\Delta$ wc2 | 8-day | 2514546 | up   | GO:0005975 | 1,23E-07    | carbohydrate metabolic process                       |
| $\Delta$ wc2 | 8-day | 2607718 | up   | GO:0005975 | 1,23E-07    | carbohydrate metabolic process                       |
| $\Delta$ wc2 | 8-day | 2609013 | up   | GO:0005975 | 1,23E-07    | carbohydrate metabolic process                       |
| $\Delta$ wc2 | 8-day | 2620185 | up   | GO:0005975 | 1,23E-07    | carbohydrate metabolic process                       |
| $\Delta$ wc2 | 8-day | 2633791 | up   | GO:0005975 | 1,23E-07    | carbohydrate metabolic process                       |
| $\Delta$ wc2 | 8-day | 2642958 | up   | GO:0005975 | 1,23E-07    | carbohydrate metabolic process                       |
| $\Delta$ wc2 | 8-day | 2643740 | up   | GO:0005975 | 1,23E-07    | carbohydrate metabolic process                       |
| $\Delta$ wc2 | 8-day | 2645945 | up   | GO:0005975 | 1,23E-07    | carbohydrate metabolic process                       |
| $\Delta$ wc2 | 8-day | 2704222 | up   | GO:0005975 | 1,23E-07    | carbohydrate metabolic process                       |
| $\Delta$ wc2 | 8-day | 2706622 | up   | GO:0005975 | 1,23E-07    | carbohydrate metabolic process                       |
| $\Delta$ wc2 | 8-day | 85210   | up   | GO:0004553 | 2,82E-07    | hydrolase activity, hydrolyzing O-glycosyl compounds |
| $\Delta$ wc2 | 8-day | 2642958 | up   | GO:0004553 | 2,82E-07    | hydrolase activity, hydrolyzing O-glycosyl compounds |
| $\Delta$ wc2 | 8-day | 2643740 | up   | GO:0004553 | 2,82E-07    | hydrolase activity, hydrolyzing O-glycosyl compounds |
| $\Delta$ wc2 | 8-day | 2704222 | up   | GO:0004553 | 2,82E-07    | hydrolase activity, hydrolyzing O-glycosyl compounds |
| $\Delta$ wc2 | 8-day | 2706622 | up   | GO:0004553 | 2,82E-07    | hydrolase activity, hydrolyzing O-glycosyl compounds |
| $\Delta$ wc2 | 8-day | 1120318 | up   | GO:0005506 | 1,41E-05    | iron ion binding                                     |
| $\Delta$ wc2 | 8-day | 2364606 | up   | GO:0005506 | 1,41E-05    | iron ion binding                                     |
| $\Delta$ wc2 | 8-day | 2491624 | up   | GO:0005506 | 1,41E-05    | iron ion binding                                     |
| $\Delta$ wc2 | 8-day | 2501258 | up   | GO:0005506 | 1,41E-05    | iron ion binding                                     |
| $\Delta$ wc2 | 8-day | 2604628 | up   | GO:0005506 | 1,41E-05    | iron ion binding                                     |
| $\Delta$ wc2 | 8-day | 2616590 | up   | GO:0005506 | 1,41E-05    | iron ion binding                                     |
| $\Delta$ wc2 | 8-day | 2617060 | up   | GO:0005506 | 1,41E-05    | iron ion binding                                     |
| $\Delta$ wc2 | 8-day | 2623189 | up   | GO:0005506 | 1,41E-05    | iron ion binding                                     |
| $\Delta$ wc2 | 8-day | 2635870 | up   | GO:0005506 | 1,41E-05    | iron ion binding                                     |
| $\Delta$ wc2 | 8-day | 2637467 | up   | GO:0005506 | 1,41E-05    | iron ion binding                                     |
| $\Delta$ wc2 | 8-day | 2638282 | up   | GO:0005506 | 1,41E-05    | iron ion binding                                     |

|              |       |         |    |            |             |                                   |
|--------------|-------|---------|----|------------|-------------|-----------------------------------|
| $\Delta$ wc2 | 8-day | 2666440 | up | GO:0005506 | 1,41E-05    | iron ion binding                  |
| $\Delta$ wc2 | 8-day | 2753029 | up | GO:0005506 | 1,41E-05    | iron ion binding                  |
| $\Delta$ wc2 | 8-day | 1120318 | up | GO:0004497 | 0,000384306 | monooxygenase activity            |
| $\Delta$ wc2 | 8-day | 1342670 | up | GO:0004497 | 0,000384306 | monooxygenase activity            |
| $\Delta$ wc2 | 8-day | 2364606 | up | GO:0004497 | 0,000384306 | monooxygenase activity            |
| $\Delta$ wc2 | 8-day | 2490194 | up | GO:0004497 | 0,000384306 | monooxygenase activity            |
| $\Delta$ wc2 | 8-day | 2491624 | up | GO:0004497 | 0,000384306 | monooxygenase activity            |
| $\Delta$ wc2 | 8-day | 2501258 | up | GO:0004497 | 0,000384306 | monooxygenase activity            |
| $\Delta$ wc2 | 8-day | 2557571 | up | GO:0004497 | 0,000384306 | monooxygenase activity            |
| $\Delta$ wc2 | 8-day | 2573393 | up | GO:0004497 | 0,000384306 | monooxygenase activity            |
| $\Delta$ wc2 | 8-day | 2573396 | up | GO:0004497 | 0,000384306 | monooxygenase activity            |
| $\Delta$ wc2 | 8-day | 2616590 | up | GO:0004497 | 0,000384306 | monooxygenase activity            |
| $\Delta$ wc2 | 8-day | 2635870 | up | GO:0004497 | 0,000384306 | monooxygenase activity            |
| $\Delta$ wc2 | 8-day | 2637467 | up | GO:0004497 | 0,000384306 | monooxygenase activity            |
| $\Delta$ wc2 | 8-day | 2638282 | up | GO:0004497 | 0,000384306 | monooxygenase activity            |
| $\Delta$ wc2 | 8-day | 2666440 | up | GO:0004497 | 0,000384306 | monooxygenase activity            |
| $\Delta$ wc2 | 8-day | 2703927 | up | GO:0004497 | 0,000384306 | monooxygenase activity            |
| $\Delta$ wc2 | 8-day | 2753029 | up | GO:0004497 | 0,000384306 | monooxygenase activity            |
| $\Delta$ wc2 | 8-day | 1120318 | up | GO:0020037 | 0,000529648 | heme binding                      |
| $\Delta$ wc2 | 8-day | 2364606 | up | GO:0020037 | 0,000529648 | heme binding                      |
| $\Delta$ wc2 | 8-day | 2491624 | up | GO:0020037 | 0,000529648 | heme binding                      |
| $\Delta$ wc2 | 8-day | 2501258 | up | GO:0020037 | 0,000529648 | heme binding                      |
| $\Delta$ wc2 | 8-day | 2604628 | up | GO:0020037 | 0,000529648 | heme binding                      |
| $\Delta$ wc2 | 8-day | 2608091 | up | GO:0020037 | 0,000529648 | heme binding                      |
| $\Delta$ wc2 | 8-day | 2616590 | up | GO:0020037 | 0,000529648 | heme binding                      |
| $\Delta$ wc2 | 8-day | 2635870 | up | GO:0020037 | 0,000529648 | heme binding                      |
| $\Delta$ wc2 | 8-day | 2637467 | up | GO:0020037 | 0,000529648 | heme binding                      |
| $\Delta$ wc2 | 8-day | 2638282 | up | GO:0020037 | 0,000529648 | heme binding                      |
| $\Delta$ wc2 | 8-day | 2666440 | up | GO:0020037 | 0,000529648 | heme binding                      |
| $\Delta$ wc2 | 8-day | 2673121 | up | GO:0020037 | 0,000529648 | heme binding                      |
| $\Delta$ wc2 | 8-day | 2753029 | up | GO:0020037 | 0,000529648 | heme binding                      |
| $\Delta$ wc2 | 8-day | 1120318 | up | GO:0050381 | 0,000529648 | unspecific monooxygenase activity |
| $\Delta$ wc2 | 8-day | 2491624 | up | GO:0050381 | 0,000529648 | unspecific monooxygenase activity |
| $\Delta$ wc2 | 8-day | 2637467 | up | GO:0050381 | 0,000529648 | unspecific monooxygenase activity |

|              |       |         |    |            |             |                                                          |
|--------------|-------|---------|----|------------|-------------|----------------------------------------------------------|
| $\Delta wc2$ | 8-day | 2666440 | up | GO:0050381 | 0,000529648 | unspecific monooxygenase activity                        |
| $\Delta wc2$ | 8-day | 2753029 | up | GO:0050381 | 0,000529648 | unspecific monooxygenase activity                        |
| $\Delta wc2$ | 8-day | 2638753 | up | GO:0016614 | 0,001502273 | oxidoreductase activity, acting on CH-OH group of donors |
| $\Delta wc2$ | 8-day | 2643062 | up | GO:0016614 | 0,001502273 | oxidoreductase activity, acting on CH-OH group of donors |
| $\Delta wc2$ | 8-day | 2663917 | up | GO:0016614 | 0,001502273 | oxidoreductase activity, acting on CH-OH group of donors |
| $\Delta wc2$ | 8-day | 2693570 | up | GO:0016614 | 0,001502273 | oxidoreductase activity, acting on CH-OH group of donors |
| $\Delta wc2$ | 8-day | 2643062 | up | GO:0008812 | 0,002417551 | choline dehydrogenase activity                           |
| $\Delta wc2$ | 8-day | 2693570 | up | GO:0008812 | 0,002417551 | choline dehydrogenase activity                           |
| $\Delta wc2$ | 8-day | 2643062 | up | GO:0006066 | 0,002417551 | alcohol metabolic process                                |
| $\Delta wc2$ | 8-day | 2693570 | up | GO:0006066 | 0,002417551 | alcohol metabolic process                                |
| $\Delta wc2$ | 8-day | 1120318 | up | GO:0006118 | 0,004482871 | electron transport                                       |
| $\Delta wc2$ | 8-day | 1215660 | up | GO:0006118 | 0,004482871 | electron transport                                       |
| $\Delta wc2$ | 8-day | 1342670 | up | GO:0006118 | 0,004482871 | electron transport                                       |
| $\Delta wc2$ | 8-day | 2364606 | up | GO:0006118 | 0,004482871 | electron transport                                       |
| $\Delta wc2$ | 8-day | 2490194 | up | GO:0006118 | 0,004482871 | electron transport                                       |
| $\Delta wc2$ | 8-day | 2491624 | up | GO:0006118 | 0,004482871 | electron transport                                       |
| $\Delta wc2$ | 8-day | 2501258 | up | GO:0006118 | 0,004482871 | electron transport                                       |
| $\Delta wc2$ | 8-day | 2557571 | up | GO:0006118 | 0,004482871 | electron transport                                       |
| $\Delta wc2$ | 8-day | 2573393 | up | GO:0006118 | 0,004482871 | electron transport                                       |
| $\Delta wc2$ | 8-day | 2573396 | up | GO:0006118 | 0,004482871 | electron transport                                       |
| $\Delta wc2$ | 8-day | 2604628 | up | GO:0006118 | 0,004482871 | electron transport                                       |
| $\Delta wc2$ | 8-day | 2605889 | up | GO:0006118 | 0,004482871 | electron transport                                       |
| $\Delta wc2$ | 8-day | 2616557 | up | GO:0006118 | 0,004482871 | electron transport                                       |
| $\Delta wc2$ | 8-day | 2616590 | up | GO:0006118 | 0,004482871 | electron transport                                       |
| $\Delta wc2$ | 8-day | 2625730 | up | GO:0006118 | 0,004482871 | electron transport                                       |
| $\Delta wc2$ | 8-day | 2635870 | up | GO:0006118 | 0,004482871 | electron transport                                       |
| $\Delta wc2$ | 8-day | 2637467 | up | GO:0006118 | 0,004482871 | electron transport                                       |
| $\Delta wc2$ | 8-day | 2638282 | up | GO:0006118 | 0,004482871 | electron transport                                       |
| $\Delta wc2$ | 8-day | 2666440 | up | GO:0006118 | 0,004482871 | electron transport                                       |
| $\Delta wc2$ | 8-day | 2671376 | up | GO:0006118 | 0,004482871 | electron transport                                       |
| $\Delta wc2$ | 8-day | 2703927 | up | GO:0006118 | 0,004482871 | electron transport                                       |
| $\Delta wc2$ | 8-day | 2753029 | up | GO:0006118 | 0,004482871 | electron transport                                       |
| $\Delta wc2$ | 8-day | 2607659 | up | GO:0008643 | 0,006556977 | carbohydrate transport                                   |
| $\Delta wc2$ | 8-day | 2641095 | up | GO:0008643 | 0,006556977 | carbohydrate transport                                   |

|              |       |         |      |            |             |                                      |
|--------------|-------|---------|------|------------|-------------|--------------------------------------|
| $\Delta$ wc2 | 8-day | 2607659 | up   | GO:0008733 | 0,008412206 | L-arabinose isomerase activity       |
| $\Delta$ wc2 | 8-day | 2641095 | up   | GO:0008733 | 0,008412206 | L-arabinose isomerase activity       |
| $\Delta$ wc2 | 8-day | 2607659 | up   | GO:0005351 | 0,01236846  | sugar:hydrogen symporter activity    |
| $\Delta$ wc2 | 8-day | 2641095 | up   | GO:0005351 | 0,01236846  | sugar:hydrogen symporter activity    |
| $\Delta$ wc2 | 8-day | 2638753 | up   | GO:0050660 | 0,018381024 | FAD binding                          |
| $\Delta$ wc2 | 8-day | 2640123 | up   | GO:0050660 | 0,018381024 | FAD binding                          |
| $\Delta$ wc2 | 8-day | 2643062 | up   | GO:0050660 | 0,018381024 | FAD binding                          |
| $\Delta$ wc2 | 8-day | 2663917 | up   | GO:0050660 | 0,018381024 | FAD binding                          |
| $\Delta$ wc2 | 8-day | 2693570 | up   | GO:0050660 | 0,018381024 | FAD binding                          |
| $\Delta$ wc2 | 8-day | 2748659 | up   | GO:0050660 | 0,018381024 | FAD binding                          |
| $\Delta$ wc2 | 8-day | 2279823 | up   | GO:0005524 | 0,018381024 | ATP binding                          |
| $\Delta$ wc2 | 8-day | 2529670 | up   | GO:0005524 | 0,018381024 | ATP binding                          |
| $\Delta$ wc2 | 8-day | 2623809 | up   | GO:0005524 | 0,018381024 | ATP binding                          |
| $\Delta$ wc2 | 8-day | 2645675 | up   | GO:0005524 | 0,018381024 | ATP binding                          |
| $\Delta$ wc2 | 8-day | 2675859 | up   | GO:0005524 | 0,018381024 | ATP binding                          |
| $\Delta$ wc2 | 8-day | 2693043 | up   | GO:0005524 | 0,018381024 | ATP binding                          |
| $\Delta$ wc2 | 8-day | 2693940 | up   | GO:0005524 | 0,018381024 | ATP binding                          |
| $\Delta$ wc2 | 8-day | 2727986 | up   | GO:0005524 | 0,018381024 | ATP binding                          |
| $\Delta$ wc2 | 8-day | 2643740 | up   | GO:0006032 | 0,022255079 | chitin catabolic process             |
| $\Delta$ wc2 | 8-day | 2706622 | up   | GO:0006032 | 0,022255079 | chitin catabolic process             |
| $\Delta$ wc2 | 8-day | 2632766 | up   | GO:0004197 | 0,0334914   | cysteine-type endopeptidase activity |
| $\Delta$ wc2 | 8-day | 85210   | up   | GO:0004568 | 0,04192666  | chitinase activity                   |
| $\Delta$ wc2 | 8-day | 2643740 | up   | GO:0004568 | 0,04192666  | chitinase activity                   |
| $\Delta$ wc2 | 8-day | 2706622 | up   | GO:0004568 | 0,04192666  | chitinase activity                   |
| $\Delta$ wc2 | 8-day | 85210   | up   | GO:0008843 | 0,04192666  | endochitinase activity               |
| $\Delta$ wc2 | 8-day | 2643740 | up   | GO:0008843 | 0,04192666  | endochitinase activity               |
| $\Delta$ wc2 | 8-day | 2706622 | up   | GO:0008843 | 0,04192666  | endochitinase activity               |
| $\Delta$ wc2 | 8-day | 1189573 | down | GO:0016491 | 1,71E-05    | oxidoreductase activity              |
| $\Delta$ wc2 | 8-day | 2312801 | down | GO:0016491 | 1,71E-05    | oxidoreductase activity              |
| $\Delta$ wc2 | 8-day | 2483752 | down | GO:0016491 | 1,71E-05    | oxidoreductase activity              |
| $\Delta$ wc2 | 8-day | 2490518 | down | GO:0016491 | 1,71E-05    | oxidoreductase activity              |
| $\Delta$ wc2 | 8-day | 2497674 | down | GO:0016491 | 1,71E-05    | oxidoreductase activity              |
| $\Delta$ wc2 | 8-day | 2499521 | down | GO:0016491 | 1,71E-05    | oxidoreductase activity              |
| $\Delta$ wc2 | 8-day | 2507164 | down | GO:0016491 | 1,71E-05    | oxidoreductase activity              |

|      |       |         |      |            |             |                                     |
|------|-------|---------|------|------------|-------------|-------------------------------------|
| Δwc2 | 8-day | 2515739 | down | GO:0016491 | 1,71E-05    | oxidoreductase activity             |
| Δwc2 | 8-day | 2516444 | down | GO:0016491 | 1,71E-05    | oxidoreductase activity             |
| Δwc2 | 8-day | 2606988 | down | GO:0016491 | 1,71E-05    | oxidoreductase activity             |
| Δwc2 | 8-day | 2608048 | down | GO:0016491 | 1,71E-05    | oxidoreductase activity             |
| Δwc2 | 8-day | 2615160 | down | GO:0016491 | 1,71E-05    | oxidoreductase activity             |
| Δwc2 | 8-day | 2616880 | down | GO:0016491 | 1,71E-05    | oxidoreductase activity             |
| Δwc2 | 8-day | 2616916 | down | GO:0016491 | 1,71E-05    | oxidoreductase activity             |
| Δwc2 | 8-day | 2618220 | down | GO:0016491 | 1,71E-05    | oxidoreductase activity             |
| Δwc2 | 8-day | 2623663 | down | GO:0016491 | 1,71E-05    | oxidoreductase activity             |
| Δwc2 | 8-day | 2625917 | down | GO:0016491 | 1,71E-05    | oxidoreductase activity             |
| Δwc2 | 8-day | 2629507 | down | GO:0016491 | 1,71E-05    | oxidoreductase activity             |
| Δwc2 | 8-day | 2629850 | down | GO:0016491 | 1,71E-05    | oxidoreductase activity             |
| Δwc2 | 8-day | 2637755 | down | GO:0016491 | 1,71E-05    | oxidoreductase activity             |
| Δwc2 | 8-day | 2639682 | down | GO:0016491 | 1,71E-05    | oxidoreductase activity             |
| Δwc2 | 8-day | 2641520 | down | GO:0016491 | 1,71E-05    | oxidoreductase activity             |
| Δwc2 | 8-day | 2661224 | down | GO:0016491 | 1,71E-05    | oxidoreductase activity             |
| Δwc2 | 8-day | 2705421 | down | GO:0016491 | 1,71E-05    | oxidoreductase activity             |
| Δwc2 | 8-day | 2629603 | down | GO:0005199 | 0,004542905 | structural constituent of cell wall |
| Δwc2 | 8-day | 73881   | down | GO:0008152 | 0,004542905 | metabolic process                   |
| Δwc2 | 8-day | 1092260 | down | GO:0008152 | 0,004542905 | metabolic process                   |
| Δwc2 | 8-day | 1189573 | down | GO:0008152 | 0,004542905 | metabolic process                   |
| Δwc2 | 8-day | 1325481 | down | GO:0008152 | 0,004542905 | metabolic process                   |
| Δwc2 | 8-day | 2161304 | down | GO:0008152 | 0,004542905 | metabolic process                   |
| Δwc2 | 8-day | 2495032 | down | GO:0008152 | 0,004542905 | metabolic process                   |
| Δwc2 | 8-day | 2507164 | down | GO:0008152 | 0,004542905 | metabolic process                   |
| Δwc2 | 8-day | 2511095 | down | GO:0008152 | 0,004542905 | metabolic process                   |
| Δwc2 | 8-day | 2540071 | down | GO:0008152 | 0,004542905 | metabolic process                   |
| Δwc2 | 8-day | 2606988 | down | GO:0008152 | 0,004542905 | metabolic process                   |
| Δwc2 | 8-day | 2608048 | down | GO:0008152 | 0,004542905 | metabolic process                   |
| Δwc2 | 8-day | 2612826 | down | GO:0008152 | 0,004542905 | metabolic process                   |
| Δwc2 | 8-day | 2616880 | down | GO:0008152 | 0,004542905 | metabolic process                   |
| Δwc2 | 8-day | 2616916 | down | GO:0008152 | 0,004542905 | metabolic process                   |
| Δwc2 | 8-day | 2618904 | down | GO:0008152 | 0,004542905 | metabolic process                   |
| Δwc2 | 8-day | 2626867 | down | GO:0008152 | 0,004542905 | metabolic process                   |

|      |       |         |      |            |             |                                                     |
|------|-------|---------|------|------------|-------------|-----------------------------------------------------|
| Δwc2 | 8-day | 2627172 | down | GO:0008152 | 0,004542905 | metabolic process                                   |
| Δwc2 | 8-day | 2629850 | down | GO:0008152 | 0,004542905 | metabolic process                                   |
| Δwc2 | 8-day | 2631112 | down | GO:0008152 | 0,004542905 | metabolic process                                   |
| Δwc2 | 8-day | 2631237 | down | GO:0008152 | 0,004542905 | metabolic process                                   |
| Δwc2 | 8-day | 2637643 | down | GO:0008152 | 0,004542905 | metabolic process                                   |
| Δwc2 | 8-day | 2637755 | down | GO:0008152 | 0,004542905 | metabolic process                                   |
| Δwc2 | 8-day | 2641520 | down | GO:0008152 | 0,004542905 | metabolic process                                   |
| Δwc2 | 8-day | 2705421 | down | GO:0008152 | 0,004542905 | metabolic process                                   |
| Δwc2 | 8-day | 2629603 | down | GO:0005618 | 0,004542905 | cell wall                                           |
| Δwc2 | 8-day | 1131542 | down | GO:0004497 | 0,004542905 | monooxygenase activity                              |
| Δwc2 | 8-day | 1193647 | down | GO:0004497 | 0,004542905 | monooxygenase activity                              |
| Δwc2 | 8-day | 2583618 | down | GO:0004497 | 0,004542905 | monooxygenase activity                              |
| Δwc2 | 8-day | 2616301 | down | GO:0004497 | 0,004542905 | monooxygenase activity                              |
| Δwc2 | 8-day | 2620407 | down | GO:0004497 | 0,004542905 | monooxygenase activity                              |
| Δwc2 | 8-day | 2629864 | down | GO:0004497 | 0,004542905 | monooxygenase activity                              |
| Δwc2 | 8-day | 2632925 | down | GO:0004497 | 0,004542905 | monooxygenase activity                              |
| Δwc2 | 8-day | 2635487 | down | GO:0004497 | 0,004542905 | monooxygenase activity                              |
| Δwc2 | 8-day | 2636544 | down | GO:0004497 | 0,004542905 | monooxygenase activity                              |
| Δwc2 | 8-day | 2638355 | down | GO:0004497 | 0,004542905 | monooxygenase activity                              |
| Δwc2 | 8-day | 2668568 | down | GO:0004497 | 0,004542905 | monooxygenase activity                              |
| Δwc2 | 8-day | 2703965 | down | GO:0004497 | 0,004542905 | monooxygenase activity                              |
| Δwc2 | 8-day | 2703966 | down | GO:0004497 | 0,004542905 | monooxygenase activity                              |
| Δwc2 | 8-day | 2705258 | down | GO:0004497 | 0,004542905 | monooxygenase activity                              |
| Δwc2 | 8-day | 2735179 | down | GO:0004497 | 0,004542905 | monooxygenase activity                              |
| Δwc2 | 8-day | 2675831 | down | GO:0015171 | 0,009934347 | amino acid transmembrane transporter activity       |
| Δwc2 | 8-day | 2675831 | down | GO:0006865 | 0,009934347 | amino acid transport                                |
| Δwc2 | 8-day | 2641520 | down | GO:0004316 | 0,019508114 | 3-oxoacyl-[acyl-carrier-protein] reductase activity |
| Δwc2 | 8-day | 2705421 | down | GO:0004316 | 0,019508114 | 3-oxoacyl-[acyl-carrier-protein] reductase activity |
| Δwc2 | 8-day | 68300   | down | GO:0006810 | 0,023640689 | transport                                           |
| Δwc2 | 8-day | 1163017 | down | GO:0006810 | 0,023640689 | transport                                           |
| Δwc2 | 8-day | 1171024 | down | GO:0006810 | 0,023640689 | transport                                           |
| Δwc2 | 8-day | 2283957 | down | GO:0006810 | 0,023640689 | transport                                           |
| Δwc2 | 8-day | 2516374 | down | GO:0006810 | 0,023640689 | transport                                           |
| Δwc2 | 8-day | 2519917 | down | GO:0006810 | 0,023640689 | transport                                           |

|               |        |         |      |            |             |                                                      |
|---------------|--------|---------|------|------------|-------------|------------------------------------------------------|
| $\Delta$ wc2  | 8-day  | 2543516 | down | GO:0006810 | 0,023640689 | transport                                            |
| $\Delta$ wc2  | 8-day  | 2550918 | down | GO:0006810 | 0,023640689 | transport                                            |
| $\Delta$ wc2  | 8-day  | 2617729 | down | GO:0006810 | 0,023640689 | transport                                            |
| $\Delta$ wc2  | 8-day  | 2623492 | down | GO:0006810 | 0,023640689 | transport                                            |
| $\Delta$ wc2  | 8-day  | 2627703 | down | GO:0006810 | 0,023640689 | transport                                            |
| $\Delta$ wc2  | 8-day  | 2661224 | down | GO:0006810 | 0,023640689 | transport                                            |
| $\Delta$ wc2  | 8-day  | 2675831 | down | GO:0006810 | 0,023640689 | transport                                            |
| $\Delta$ wc2  | 8-day  | 2701571 | down | GO:0006810 | 0,023640689 | transport                                            |
| $\Delta$ wc2  | 8-day  | 1131542 | down | GO:0006118 | 0,028824383 | electron transport                                   |
| $\Delta$ wc2  | 8-day  | 1193647 | down | GO:0006118 | 0,028824383 | electron transport                                   |
| $\Delta$ wc2  | 8-day  | 2490518 | down | GO:0006118 | 0,028824383 | electron transport                                   |
| $\Delta$ wc2  | 8-day  | 2497674 | down | GO:0006118 | 0,028824383 | electron transport                                   |
| $\Delta$ wc2  | 8-day  | 2499521 | down | GO:0006118 | 0,028824383 | electron transport                                   |
| $\Delta$ wc2  | 8-day  | 2583618 | down | GO:0006118 | 0,028824383 | electron transport                                   |
| $\Delta$ wc2  | 8-day  | 2616301 | down | GO:0006118 | 0,028824383 | electron transport                                   |
| $\Delta$ wc2  | 8-day  | 2620407 | down | GO:0006118 | 0,028824383 | electron transport                                   |
| $\Delta$ wc2  | 8-day  | 2629850 | down | GO:0006118 | 0,028824383 | electron transport                                   |
| $\Delta$ wc2  | 8-day  | 2629864 | down | GO:0006118 | 0,028824383 | electron transport                                   |
| $\Delta$ wc2  | 8-day  | 2632925 | down | GO:0006118 | 0,028824383 | electron transport                                   |
| $\Delta$ wc2  | 8-day  | 2635487 | down | GO:0006118 | 0,028824383 | electron transport                                   |
| $\Delta$ wc2  | 8-day  | 2636544 | down | GO:0006118 | 0,028824383 | electron transport                                   |
| $\Delta$ wc2  | 8-day  | 2638355 | down | GO:0006118 | 0,028824383 | electron transport                                   |
| $\Delta$ wc2  | 8-day  | 2639682 | down | GO:0006118 | 0,028824383 | electron transport                                   |
| $\Delta$ wc2  | 8-day  | 2668568 | down | GO:0006118 | 0,028824383 | electron transport                                   |
| $\Delta$ wc2  | 8-day  | 2703965 | down | GO:0006118 | 0,028824383 | electron transport                                   |
| $\Delta$ wc2  | 8-day  | 2703966 | down | GO:0006118 | 0,028824383 | electron transport                                   |
| $\Delta$ wc2  | 8-day  | 2705258 | down | GO:0006118 | 0,028824383 | electron transport                                   |
| $\Delta$ wc2  | 8-day  | 2735179 | down | GO:0006118 | 0,028824383 | electron transport                                   |
| $\Delta$ wc2  | 8-day  | 2577992 | down | GO:0004194 | 0,028824383 | pepsin A activity                                    |
| $\Delta$ bri1 | 12-day | 2502504 | down | GO:0005975 | 0,000249884 | carbohydrate metabolic process                       |
| $\Delta$ bri1 | 12-day | 2612719 | down | GO:0005975 | 0,000249884 | carbohydrate metabolic process                       |
| $\Delta$ bri1 | 12-day | 2645945 | down | GO:0005975 | 0,000249884 | carbohydrate metabolic process                       |
| $\Delta$ bri1 | 12-day | 2502504 | down | GO:0004553 | 0,000308535 | hydrolase activity, hydrolyzing O-glycosyl compounds |
| $\Delta$ bri1 | 12-day | 2612719 | down | GO:0004553 | 0,000308535 | hydrolase activity, hydrolyzing O-glycosyl compounds |



|       |        |         |      |            |             |                                     |
|-------|--------|---------|------|------------|-------------|-------------------------------------|
| Δbri1 | 12-day | 1194451 | down | GO:0016491 | 0,000308535 | oxidoreductase activity             |
| Δbri1 | 12-day | 2516444 | down | GO:0016491 | 0,000308535 | oxidoreductase activity             |
| Δbri1 | 12-day | 2524219 | down | GO:0016491 | 0,000308535 | oxidoreductase activity             |
| Δbri1 | 12-day | 2577740 | down | GO:0016491 | 0,000308535 | oxidoreductase activity             |
| Δbri1 | 12-day | 2606988 | down | GO:0016491 | 0,000308535 | oxidoreductase activity             |
| Δbri1 | 12-day | 2615160 | down | GO:0016491 | 0,000308535 | oxidoreductase activity             |
| Δbri1 | 12-day | 2625561 | down | GO:0016491 | 0,000308535 | oxidoreductase activity             |
| Δbri1 | 12-day | 2627304 | down | GO:0016491 | 0,000308535 | oxidoreductase activity             |
| Δbri1 | 12-day | 2637755 | down | GO:0016491 | 0,000308535 | oxidoreductase activity             |
| Δbri1 | 12-day | 2639682 | down | GO:0016491 | 0,000308535 | oxidoreductase activity             |
| Δbri1 | 12-day | 2671376 | down | GO:0016491 | 0,000308535 | oxidoreductase activity             |
| Δbri1 | 12-day | 2697968 | down | GO:0016491 | 0,000308535 | oxidoreductase activity             |
| Δbri1 | 12-day | 2705421 | down | GO:0016491 | 0,000308535 | oxidoreductase activity             |
| Δbri1 | 12-day | 2629603 | down | GO:0005199 | 0,000508187 | structural constituent of cell wall |
| Δbri1 | 12-day | 2629603 | down | GO:0005618 | 0,000589421 | cell wall                           |
| Δbri1 | 12-day | 2368049 | down | GO:0003824 | 0,000589421 | catalytic activity                  |
| Δbri1 | 12-day | 2484205 | down | GO:0003824 | 0,000589421 | catalytic activity                  |
| Δbri1 | 12-day | 2488410 | down | GO:0003824 | 0,000589421 | catalytic activity                  |
| Δbri1 | 12-day | 2501669 | down | GO:0003824 | 0,000589421 | catalytic activity                  |
| Δbri1 | 12-day | 2516444 | down | GO:0003824 | 0,000589421 | catalytic activity                  |
| Δbri1 | 12-day | 2543117 | down | GO:0003824 | 0,000589421 | catalytic activity                  |
| Δbri1 | 12-day | 2577740 | down | GO:0003824 | 0,000589421 | catalytic activity                  |
| Δbri1 | 12-day | 2577781 | down | GO:0003824 | 0,000589421 | catalytic activity                  |
| Δbri1 | 12-day | 2606988 | down | GO:0003824 | 0,000589421 | catalytic activity                  |
| Δbri1 | 12-day | 2618904 | down | GO:0003824 | 0,000589421 | catalytic activity                  |
| Δbri1 | 12-day | 2625561 | down | GO:0003824 | 0,000589421 | catalytic activity                  |
| Δbri1 | 12-day | 2627304 | down | GO:0003824 | 0,000589421 | catalytic activity                  |
| Δbri1 | 12-day | 2629622 | down | GO:0003824 | 0,000589421 | catalytic activity                  |
| Δbri1 | 12-day | 2660684 | down | GO:0003824 | 0,000589421 | catalytic activity                  |
| Δbri1 | 12-day | 2701028 | down | GO:0003824 | 0,000589421 | catalytic activity                  |
| Δbri1 | 12-day | 2705421 | down | GO:0003824 | 0,000589421 | catalytic activity                  |
| Δbri1 | 12-day | 2484205 | down | GO:0008152 | 0,001731762 | metabolic process                   |
| Δbri1 | 12-day | 2488410 | down | GO:0008152 | 0,001731762 | metabolic process                   |
| Δbri1 | 12-day | 2501669 | down | GO:0008152 | 0,001731762 | metabolic process                   |

|       |        |         |      |            |             |                      |
|-------|--------|---------|------|------------|-------------|----------------------|
| Δbri1 | 12-day | 2512248 | down | GO:0008152 | 0,001731762 | metabolic process    |
| Δbri1 | 12-day | 2543117 | down | GO:0008152 | 0,001731762 | metabolic process    |
| Δbri1 | 12-day | 2577740 | down | GO:0008152 | 0,001731762 | metabolic process    |
| Δbri1 | 12-day | 2577781 | down | GO:0008152 | 0,001731762 | metabolic process    |
| Δbri1 | 12-day | 2601905 | down | GO:0008152 | 0,001731762 | metabolic process    |
| Δbri1 | 12-day | 2606988 | down | GO:0008152 | 0,001731762 | metabolic process    |
| Δbri1 | 12-day | 2618904 | down | GO:0008152 | 0,001731762 | metabolic process    |
| Δbri1 | 12-day | 2624525 | down | GO:0008152 | 0,001731762 | metabolic process    |
| Δbri1 | 12-day | 2625561 | down | GO:0008152 | 0,001731762 | metabolic process    |
| Δbri1 | 12-day | 2627304 | down | GO:0008152 | 0,001731762 | metabolic process    |
| Δbri1 | 12-day | 2629622 | down | GO:0008152 | 0,001731762 | metabolic process    |
| Δbri1 | 12-day | 2637708 | down | GO:0008152 | 0,001731762 | metabolic process    |
| Δbri1 | 12-day | 2637755 | down | GO:0008152 | 0,001731762 | metabolic process    |
| Δbri1 | 12-day | 2660684 | down | GO:0008152 | 0,001731762 | metabolic process    |
| Δbri1 | 12-day | 2701028 | down | GO:0008152 | 0,001731762 | metabolic process    |
| Δbri1 | 12-day | 2705421 | down | GO:0008152 | 0,001731762 | metabolic process    |
| Δbri1 | 12-day | 2726410 | down | GO:0008152 | 0,001731762 | metabolic process    |
| Δbri1 | 12-day | 2481387 | down | GO:0005488 | 0,008212127 | binding              |
| Δbri1 | 12-day | 2488410 | down | GO:0005488 | 0,008212127 | binding              |
| Δbri1 | 12-day | 2520877 | down | GO:0005488 | 0,008212127 | binding              |
| Δbri1 | 12-day | 2577740 | down | GO:0005488 | 0,008212127 | binding              |
| Δbri1 | 12-day | 2606988 | down | GO:0005488 | 0,008212127 | binding              |
| Δbri1 | 12-day | 2618904 | down | GO:0005488 | 0,008212127 | binding              |
| Δbri1 | 12-day | 2625561 | down | GO:0005488 | 0,008212127 | binding              |
| Δbri1 | 12-day | 2627304 | down | GO:0005488 | 0,008212127 | binding              |
| Δbri1 | 12-day | 2628751 | down | GO:0005488 | 0,008212127 | binding              |
| Δbri1 | 12-day | 2660684 | down | GO:0005488 | 0,008212127 | binding              |
| Δbri1 | 12-day | 2705421 | down | GO:0005488 | 0,008212127 | binding              |
| Δbri1 | 12-day | 2520877 | down | GO:0005215 | 0,03108854  | transporter activity |
| Δbri1 | 12-day | 2628751 | down | GO:0005215 | 0,03108854  | transporter activity |
| Δbri1 | 12-day | 2637509 | down | GO:0005215 | 0,03108854  | transporter activity |
| Δc2h2 | 12-day | 1300522 | up   | GO:0005506 | 1,65E-10    | iron ion binding     |
| Δc2h2 | 12-day | 2364606 | up   | GO:0005506 | 1,65E-10    | iron ion binding     |
| Δc2h2 | 12-day | 2493935 | up   | GO:0005506 | 1,65E-10    | iron ion binding     |

|               |        |         |      |            |             |                                                      |
|---------------|--------|---------|------|------------|-------------|------------------------------------------------------|
| $\Delta c2h2$ | 12-day | 2635870 | up   | GO:0005506 | 1,65E-10    | iron ion binding                                     |
| $\Delta c2h2$ | 12-day | 1300522 | up   | GO:0020037 | 3,21E-10    | heme binding                                         |
| $\Delta c2h2$ | 12-day | 2364606 | up   | GO:0020037 | 3,21E-10    | heme binding                                         |
| $\Delta c2h2$ | 12-day | 2635870 | up   | GO:0020037 | 3,21E-10    | heme binding                                         |
| $\Delta c2h2$ | 12-day | 2640585 | up   | GO:0020037 | 3,21E-10    | heme binding                                         |
| $\Delta c2h2$ | 12-day | 2673121 | up   | GO:0020037 | 3,21E-10    | heme binding                                         |
| $\Delta c2h2$ | 12-day | 1300522 | up   | GO:0004497 | 4,46E-08    | monooxygenase activity                               |
| $\Delta c2h2$ | 12-day | 2213880 | up   | GO:0004497 | 4,46E-08    | monooxygenase activity                               |
| $\Delta c2h2$ | 12-day | 2364606 | up   | GO:0004497 | 4,46E-08    | monooxygenase activity                               |
| $\Delta c2h2$ | 12-day | 2635870 | up   | GO:0004497 | 4,46E-08    | monooxygenase activity                               |
| $\Delta c2h2$ | 12-day | 1300522 | up   | GO:0006118 | 1,24E-07    | electron transport                                   |
| $\Delta c2h2$ | 12-day | 2213880 | up   | GO:0006118 | 1,24E-07    | electron transport                                   |
| $\Delta c2h2$ | 12-day | 2364606 | up   | GO:0006118 | 1,24E-07    | electron transport                                   |
| $\Delta c2h2$ | 12-day | 2605889 | up   | GO:0006118 | 1,24E-07    | electron transport                                   |
| $\Delta c2h2$ | 12-day | 2625730 | up   | GO:0006118 | 1,24E-07    | electron transport                                   |
| $\Delta c2h2$ | 12-day | 2635870 | up   | GO:0006118 | 1,24E-07    | electron transport                                   |
| $\Delta c2h2$ | 12-day | 1300522 | up   | GO:0050381 | 0,005879196 | unspecific monooxygenase activity                    |
| $\Delta c2h2$ | 12-day | 234329  | up   | GO:0004553 | 0,007319074 | hydrolase activity, hydrolyzing O-glycosyl compounds |
| $\Delta c2h2$ | 12-day | 2496051 | up   | GO:0004553 | 0,007319074 | hydrolase activity, hydrolyzing O-glycosyl compounds |
| $\Delta c2h2$ | 12-day | 2611511 | up   | GO:0004553 | 0,007319074 | hydrolase activity, hydrolyzing O-glycosyl compounds |
| $\Delta c2h2$ | 12-day | 2635003 | up   | GO:0004553 | 0,007319074 | hydrolase activity, hydrolyzing O-glycosyl compounds |
| $\Delta c2h2$ | 12-day | 2637065 | up   | GO:0004553 | 0,007319074 | hydrolase activity, hydrolyzing O-glycosyl compounds |
| $\Delta c2h2$ | 12-day | 2643740 | up   | GO:0004553 | 0,007319074 | hydrolase activity, hydrolyzing O-glycosyl compounds |
| $\Delta c2h2$ | 12-day | 234329  | up   | GO:0005975 | 0,00961807  | carbohydrate metabolic process                       |
| $\Delta c2h2$ | 12-day | 2496051 | up   | GO:0005975 | 0,00961807  | carbohydrate metabolic process                       |
| $\Delta c2h2$ | 12-day | 2514546 | up   | GO:0005975 | 0,00961807  | carbohydrate metabolic process                       |
| $\Delta c2h2$ | 12-day | 2611511 | up   | GO:0005975 | 0,00961807  | carbohydrate metabolic process                       |
| $\Delta c2h2$ | 12-day | 2635003 | up   | GO:0005975 | 0,00961807  | carbohydrate metabolic process                       |
| $\Delta c2h2$ | 12-day | 2637065 | up   | GO:0005975 | 0,00961807  | carbohydrate metabolic process                       |
| $\Delta c2h2$ | 12-day | 2643740 | up   | GO:0005975 | 0,00961807  | carbohydrate metabolic process                       |
| $\Delta c2h2$ | 12-day | 2643740 | up   | GO:0006032 | 0,017311507 | chitin catabolic process                             |
| $\Delta c2h2$ | 12-day | 2643740 | up   | GO:0008843 | 0,037967169 | endochitinase activity                               |
| $\Delta c2h2$ | 12-day | 2643740 | up   | GO:0004568 | 0,037967169 | chitinase activity                                   |
| $\Delta c2h2$ | 12-day | 85278   | down | GO:0003824 | 2,70E-05    | catalytic activity                                   |

|       |        |         |      |            |          |                    |
|-------|--------|---------|------|------------|----------|--------------------|
| Δc2h2 | 12-day | 2594114 | down | GO:0003824 | 2,70E-05 | catalytic activity |
| Δc2h2 | 12-day | 2606988 | down | GO:0003824 | 2,70E-05 | catalytic activity |
| Δc2h2 | 12-day | 2607837 | down | GO:0003824 | 2,70E-05 | catalytic activity |
| Δc2h2 | 12-day | 2613213 | down | GO:0003824 | 2,70E-05 | catalytic activity |
| Δc2h2 | 12-day | 2615598 | down | GO:0003824 | 2,70E-05 | catalytic activity |
| Δc2h2 | 12-day | 2625561 | down | GO:0003824 | 2,70E-05 | catalytic activity |
| Δc2h2 | 12-day | 2625782 | down | GO:0003824 | 2,70E-05 | catalytic activity |
| Δc2h2 | 12-day | 2629548 | down | GO:0003824 | 2,70E-05 | catalytic activity |
| Δc2h2 | 12-day | 2629646 | down | GO:0003824 | 2,70E-05 | catalytic activity |
| Δc2h2 | 12-day | 2630634 | down | GO:0003824 | 2,70E-05 | catalytic activity |
| Δc2h2 | 12-day | 2631112 | down | GO:0003824 | 2,70E-05 | catalytic activity |
| Δc2h2 | 12-day | 2633144 | down | GO:0003824 | 2,70E-05 | catalytic activity |
| Δc2h2 | 12-day | 2633167 | down | GO:0003824 | 2,70E-05 | catalytic activity |
| Δc2h2 | 12-day | 2635216 | down | GO:0003824 | 2,70E-05 | catalytic activity |
| Δc2h2 | 12-day | 2637668 | down | GO:0003824 | 2,70E-05 | catalytic activity |
| Δc2h2 | 12-day | 2641506 | down | GO:0003824 | 2,70E-05 | catalytic activity |
| Δc2h2 | 12-day | 2688172 | down | GO:0003824 | 2,70E-05 | catalytic activity |
| Δc2h2 | 12-day | 1202278 | down | GO:0008152 | 2,70E-05 | metabolic process  |
| Δc2h2 | 12-day | 2508441 | down | GO:0008152 | 2,70E-05 | metabolic process  |
| Δc2h2 | 12-day | 2557571 | down | GO:0008152 | 2,70E-05 | metabolic process  |
| Δc2h2 | 12-day | 2594114 | down | GO:0008152 | 2,70E-05 | metabolic process  |
| Δc2h2 | 12-day | 2604130 | down | GO:0008152 | 2,70E-05 | metabolic process  |
| Δc2h2 | 12-day | 2606988 | down | GO:0008152 | 2,70E-05 | metabolic process  |
| Δc2h2 | 12-day | 2607837 | down | GO:0008152 | 2,70E-05 | metabolic process  |
| Δc2h2 | 12-day | 2613213 | down | GO:0008152 | 2,70E-05 | metabolic process  |
| Δc2h2 | 12-day | 2615598 | down | GO:0008152 | 2,70E-05 | metabolic process  |
| Δc2h2 | 12-day | 2623956 | down | GO:0008152 | 2,70E-05 | metabolic process  |
| Δc2h2 | 12-day | 2624525 | down | GO:0008152 | 2,70E-05 | metabolic process  |
| Δc2h2 | 12-day | 2625561 | down | GO:0008152 | 2,70E-05 | metabolic process  |
| Δc2h2 | 12-day | 2625782 | down | GO:0008152 | 2,70E-05 | metabolic process  |
| Δc2h2 | 12-day | 2629548 | down | GO:0008152 | 2,70E-05 | metabolic process  |
| Δc2h2 | 12-day | 2629646 | down | GO:0008152 | 2,70E-05 | metabolic process  |
| Δc2h2 | 12-day | 2631112 | down | GO:0008152 | 2,70E-05 | metabolic process  |
| Δc2h2 | 12-day | 2633167 | down | GO:0008152 | 2,70E-05 | metabolic process  |

|       |        |         |      |            |             |                                                      |
|-------|--------|---------|------|------------|-------------|------------------------------------------------------|
| Δc2h2 | 12-day | 2637668 | down | GO:0008152 | 2,70E-05    | metabolic process                                    |
| Δc2h2 | 12-day | 2637708 | down | GO:0008152 | 2,70E-05    | metabolic process                                    |
| Δc2h2 | 12-day | 2641506 | down | GO:0008152 | 2,70E-05    | metabolic process                                    |
| Δc2h2 | 12-day | 2623956 | down | GO:0030170 | 0,000488024 | pyridoxal phosphate binding                          |
| Δc2h2 | 12-day | 2641506 | down | GO:0004316 | 0,004883594 | 3-oxoacyl-[acyl-carrier-protein] reductase activity  |
| Δc2h2 | 12-day | 2703935 | down | GO:0005199 | 0,005530036 | structural constituent of cell wall                  |
| Δc2h2 | 12-day | 2614029 | down | GO:0005618 | 0,006419692 | cell wall                                            |
| Δc2h2 | 12-day | 2703935 | down | GO:0005618 | 0,006419692 | cell wall                                            |
| Δc2h2 | 12-day | 2594114 | down | GO:0005488 | 0,044636306 | binding                                              |
| Δc2h2 | 12-day | 2603669 | down | GO:0005488 | 0,044636306 | binding                                              |
| Δc2h2 | 12-day | 2606988 | down | GO:0005488 | 0,044636306 | binding                                              |
| Δc2h2 | 12-day | 2613213 | down | GO:0005488 | 0,044636306 | binding                                              |
| Δc2h2 | 12-day | 2625561 | down | GO:0005488 | 0,044636306 | binding                                              |
| Δc2h2 | 12-day | 2625782 | down | GO:0005488 | 0,044636306 | binding                                              |
| Δc2h2 | 12-day | 2628751 | down | GO:0005488 | 0,044636306 | binding                                              |
| Δc2h2 | 12-day | 2633167 | down | GO:0005488 | 0,044636306 | binding                                              |
| Δc2h2 | 12-day | 2637668 | down | GO:0005488 | 0,044636306 | binding                                              |
| Δc2h2 | 12-day | 2641506 | down | GO:0005488 | 0,044636306 | binding                                              |
| Δfst3 | 12-day | 2172097 | down | GO:0004553 | 0,002489186 | hydrolase activity, hydrolyzing O-glycosyl compounds |
| Δfst3 | 12-day | 2496051 | down | GO:0004553 | 0,002489186 | hydrolase activity, hydrolyzing O-glycosyl compounds |
| Δfst3 | 12-day | 2612719 | down | GO:0004553 | 0,002489186 | hydrolase activity, hydrolyzing O-glycosyl compounds |
| Δfst3 | 12-day | 2547619 | down | GO:0005199 | 0,00355692  | structural constituent of cell wall                  |
| Δfst3 | 12-day | 2547619 | down | GO:0005618 | 0,003903108 | cell wall                                            |
| Δfst3 | 12-day | 2617562 | down | GO:0030246 | 0,009912079 | carbohydrate binding                                 |
| Δfst3 | 12-day | 78628   | down | GO:0050381 | 0,039618458 | unspecific monooxygenase activity                    |
| Δfst3 | 12-day | 2635869 | down | GO:0050381 | 0,039618458 | unspecific monooxygenase activity                    |
| Δfst3 | 12-day | 2172097 | down | GO:0005975 | 0,042413126 | carbohydrate metabolic process                       |
| Δfst3 | 12-day | 2496051 | down | GO:0005975 | 0,042413126 | carbohydrate metabolic process                       |
| Δfst3 | 12-day | 2507164 | down | GO:0005975 | 0,042413126 | carbohydrate metabolic process                       |
| Δfst3 | 12-day | 2612719 | down | GO:0005975 | 0,042413126 | carbohydrate metabolic process                       |
| Δfst3 | 12-day | 2631687 | down | GO:0005975 | 0,042413126 | carbohydrate metabolic process                       |
| Δfst4 | 12-day | 66483   | up   | GO:0005975 | 3,93E-07    | carbohydrate metabolic process                       |
| Δfst4 | 12-day | 256167  | up   | GO:0005975 | 3,93E-07    | carbohydrate metabolic process                       |
| Δfst4 | 12-day | 2501021 | up   | GO:0005975 | 3,93E-07    | carbohydrate metabolic process                       |

|       |        |         |    |            |             |                                |
|-------|--------|---------|----|------------|-------------|--------------------------------|
| Δfst4 | 12-day | 2557656 | up | GO:0005975 | 3,93E-07    | carbohydrate metabolic process |
| Δfst4 | 12-day | 2570936 | up | GO:0005975 | 3,93E-07    | carbohydrate metabolic process |
| Δfst4 | 12-day | 2605157 | up | GO:0005975 | 3,93E-07    | carbohydrate metabolic process |
| Δfst4 | 12-day | 2613657 | up | GO:0005975 | 3,93E-07    | carbohydrate metabolic process |
| Δfst4 | 12-day | 2621806 | up | GO:0005975 | 3,93E-07    | carbohydrate metabolic process |
| Δfst4 | 12-day | 2622563 | up | GO:0005975 | 3,93E-07    | carbohydrate metabolic process |
| Δfst4 | 12-day | 2624823 | up | GO:0005975 | 3,93E-07    | carbohydrate metabolic process |
| Δfst4 | 12-day | 2626756 | up | GO:0005975 | 3,93E-07    | carbohydrate metabolic process |
| Δfst4 | 12-day | 2641020 | up | GO:0005975 | 3,93E-07    | carbohydrate metabolic process |
| Δfst4 | 12-day | 2641022 | up | GO:0005975 | 3,93E-07    | carbohydrate metabolic process |
| Δfst4 | 12-day | 2645822 | up | GO:0005975 | 3,93E-07    | carbohydrate metabolic process |
| Δfst4 | 12-day | 2670422 | up | GO:0005975 | 3,93E-07    | carbohydrate metabolic process |
| Δfst4 | 12-day | 2686544 | up | GO:0005975 | 3,93E-07    | carbohydrate metabolic process |
| Δfst4 | 12-day | 2706631 | up | GO:0005975 | 3,93E-07    | carbohydrate metabolic process |
| Δfst4 | 12-day | 13059   | up | GO:0006508 | 0,000103152 | proteolysis                    |
| Δfst4 | 12-day | 54219   | up | GO:0006508 | 0,000103152 | proteolysis                    |
| Δfst4 | 12-day | 75642   | up | GO:0006508 | 0,000103152 | proteolysis                    |
| Δfst4 | 12-day | 1190859 | up | GO:0006508 | 0,000103152 | proteolysis                    |
| Δfst4 | 12-day | 2494345 | up | GO:0006508 | 0,000103152 | proteolysis                    |
| Δfst4 | 12-day | 2495563 | up | GO:0006508 | 0,000103152 | proteolysis                    |
| Δfst4 | 12-day | 2497944 | up | GO:0006508 | 0,000103152 | proteolysis                    |
| Δfst4 | 12-day | 2501086 | up | GO:0006508 | 0,000103152 | proteolysis                    |
| Δfst4 | 12-day | 2508594 | up | GO:0006508 | 0,000103152 | proteolysis                    |
| Δfst4 | 12-day | 2521109 | up | GO:0006508 | 0,000103152 | proteolysis                    |
| Δfst4 | 12-day | 2525660 | up | GO:0006508 | 0,000103152 | proteolysis                    |
| Δfst4 | 12-day | 2611979 | up | GO:0006508 | 0,000103152 | proteolysis                    |
| Δfst4 | 12-day | 2611989 | up | GO:0006508 | 0,000103152 | proteolysis                    |
| Δfst4 | 12-day | 2616091 | up | GO:0006508 | 0,000103152 | proteolysis                    |
| Δfst4 | 12-day | 2625721 | up | GO:0006508 | 0,000103152 | proteolysis                    |
| Δfst4 | 12-day | 2627176 | up | GO:0006508 | 0,000103152 | proteolysis                    |
| Δfst4 | 12-day | 2630895 | up | GO:0006508 | 0,000103152 | proteolysis                    |
| Δfst4 | 12-day | 2635416 | up | GO:0006508 | 0,000103152 | proteolysis                    |
| Δfst4 | 12-day | 2636358 | up | GO:0006508 | 0,000103152 | proteolysis                    |
| Δfst4 | 12-day | 2637463 | up | GO:0006508 | 0,000103152 | proteolysis                    |

|       |        |         |    |            |             |                                                      |
|-------|--------|---------|----|------------|-------------|------------------------------------------------------|
| Δfst4 | 12-day | 2639300 | up | GO:0006508 | 0,000103152 | proteolysis                                          |
| Δfst4 | 12-day | 2668049 | up | GO:0006508 | 0,000103152 | proteolysis                                          |
| Δfst4 | 12-day | 2703529 | up | GO:0006508 | 0,000103152 | proteolysis                                          |
| Δfst4 | 12-day | 1083109 | up | GO:0005506 | 0,000397283 | iron ion binding                                     |
| Δfst4 | 12-day | 1120318 | up | GO:0005506 | 0,000397283 | iron ion binding                                     |
| Δfst4 | 12-day | 1147397 | up | GO:0005506 | 0,000397283 | iron ion binding                                     |
| Δfst4 | 12-day | 1173144 | up | GO:0005506 | 0,000397283 | iron ion binding                                     |
| Δfst4 | 12-day | 1188813 | up | GO:0005506 | 0,000397283 | iron ion binding                                     |
| Δfst4 | 12-day | 2364606 | up | GO:0005506 | 0,000397283 | iron ion binding                                     |
| Δfst4 | 12-day | 2491624 | up | GO:0005506 | 0,000397283 | iron ion binding                                     |
| Δfst4 | 12-day | 2493935 | up | GO:0005506 | 0,000397283 | iron ion binding                                     |
| Δfst4 | 12-day | 2537529 | up | GO:0005506 | 0,000397283 | iron ion binding                                     |
| Δfst4 | 12-day | 2559987 | up | GO:0005506 | 0,000397283 | iron ion binding                                     |
| Δfst4 | 12-day | 2614692 | up | GO:0005506 | 0,000397283 | iron ion binding                                     |
| Δfst4 | 12-day | 2618220 | up | GO:0005506 | 0,000397283 | iron ion binding                                     |
| Δfst4 | 12-day | 2619716 | up | GO:0005506 | 0,000397283 | iron ion binding                                     |
| Δfst4 | 12-day | 2624973 | up | GO:0005506 | 0,000397283 | iron ion binding                                     |
| Δfst4 | 12-day | 2625023 | up | GO:0005506 | 0,000397283 | iron ion binding                                     |
| Δfst4 | 12-day | 2626362 | up | GO:0005506 | 0,000397283 | iron ion binding                                     |
| Δfst4 | 12-day | 2628300 | up | GO:0005506 | 0,000397283 | iron ion binding                                     |
| Δfst4 | 12-day | 2629864 | up | GO:0005506 | 0,000397283 | iron ion binding                                     |
| Δfst4 | 12-day | 2635870 | up | GO:0005506 | 0,000397283 | iron ion binding                                     |
| Δfst4 | 12-day | 2635949 | up | GO:0005506 | 0,000397283 | iron ion binding                                     |
| Δfst4 | 12-day | 2637467 | up | GO:0005506 | 0,000397283 | iron ion binding                                     |
| Δfst4 | 12-day | 2638282 | up | GO:0005506 | 0,000397283 | iron ion binding                                     |
| Δfst4 | 12-day | 2640550 | up | GO:0005506 | 0,000397283 | iron ion binding                                     |
| Δfst4 | 12-day | 2666440 | up | GO:0005506 | 0,000397283 | iron ion binding                                     |
| Δfst4 | 12-day | 2695849 | up | GO:0005506 | 0,000397283 | iron ion binding                                     |
| Δfst4 | 12-day | 2703965 | up | GO:0005506 | 0,000397283 | iron ion binding                                     |
| Δfst4 | 12-day | 256167  | up | GO:0004553 | 0,000874663 | hydrolase activity, hydrolyzing O-glycosyl compounds |
| Δfst4 | 12-day | 2605157 | up | GO:0004553 | 0,000874663 | hydrolase activity, hydrolyzing O-glycosyl compounds |
| Δfst4 | 12-day | 2613657 | up | GO:0004553 | 0,000874663 | hydrolase activity, hydrolyzing O-glycosyl compounds |
| Δfst4 | 12-day | 2621806 | up | GO:0004553 | 0,000874663 | hydrolase activity, hydrolyzing O-glycosyl compounds |
| Δfst4 | 12-day | 2622563 | up | GO:0004553 | 0,000874663 | hydrolase activity, hydrolyzing O-glycosyl compounds |

|       |        |         |    |            |             |                                                      |
|-------|--------|---------|----|------------|-------------|------------------------------------------------------|
| Δfst4 | 12-day | 2645822 | up | GO:0004553 | 0,000874663 | hydrolase activity, hydrolyzing O-glycosyl compounds |
| Δfst4 | 12-day | 2670422 | up | GO:0004553 | 0,000874663 | hydrolase activity, hydrolyzing O-glycosyl compounds |
| Δfst4 | 12-day | 2686544 | up | GO:0004553 | 0,000874663 | hydrolase activity, hydrolyzing O-glycosyl compounds |
| Δfst4 | 12-day | 2706631 | up | GO:0004553 | 0,000874663 | hydrolase activity, hydrolyzing O-glycosyl compounds |
| Δfst4 | 12-day | 1083109 | up | GO:0020037 | 0,000874663 | heme binding                                         |
| Δfst4 | 12-day | 1120318 | up | GO:0020037 | 0,000874663 | heme binding                                         |
| Δfst4 | 12-day | 1147397 | up | GO:0020037 | 0,000874663 | heme binding                                         |
| Δfst4 | 12-day | 1173144 | up | GO:0020037 | 0,000874663 | heme binding                                         |
| Δfst4 | 12-day | 1188813 | up | GO:0020037 | 0,000874663 | heme binding                                         |
| Δfst4 | 12-day | 2364606 | up | GO:0020037 | 0,000874663 | heme binding                                         |
| Δfst4 | 12-day | 2491624 | up | GO:0020037 | 0,000874663 | heme binding                                         |
| Δfst4 | 12-day | 2537529 | up | GO:0020037 | 0,000874663 | heme binding                                         |
| Δfst4 | 12-day | 2559987 | up | GO:0020037 | 0,000874663 | heme binding                                         |
| Δfst4 | 12-day | 2608091 | up | GO:0020037 | 0,000874663 | heme binding                                         |
| Δfst4 | 12-day | 2614692 | up | GO:0020037 | 0,000874663 | heme binding                                         |
| Δfst4 | 12-day | 2619716 | up | GO:0020037 | 0,000874663 | heme binding                                         |
| Δfst4 | 12-day | 2622893 | up | GO:0020037 | 0,000874663 | heme binding                                         |
| Δfst4 | 12-day | 2624973 | up | GO:0020037 | 0,000874663 | heme binding                                         |
| Δfst4 | 12-day | 2625023 | up | GO:0020037 | 0,000874663 | heme binding                                         |
| Δfst4 | 12-day | 2626362 | up | GO:0020037 | 0,000874663 | heme binding                                         |
| Δfst4 | 12-day | 2628300 | up | GO:0020037 | 0,000874663 | heme binding                                         |
| Δfst4 | 12-day | 2629864 | up | GO:0020037 | 0,000874663 | heme binding                                         |
| Δfst4 | 12-day | 2635870 | up | GO:0020037 | 0,000874663 | heme binding                                         |
| Δfst4 | 12-day | 2635949 | up | GO:0020037 | 0,000874663 | heme binding                                         |
| Δfst4 | 12-day | 2637467 | up | GO:0020037 | 0,000874663 | heme binding                                         |
| Δfst4 | 12-day | 2638282 | up | GO:0020037 | 0,000874663 | heme binding                                         |
| Δfst4 | 12-day | 2640550 | up | GO:0020037 | 0,000874663 | heme binding                                         |
| Δfst4 | 12-day | 2640585 | up | GO:0020037 | 0,000874663 | heme binding                                         |
| Δfst4 | 12-day | 2643274 | up | GO:0020037 | 0,000874663 | heme binding                                         |
| Δfst4 | 12-day | 2666440 | up | GO:0020037 | 0,000874663 | heme binding                                         |
| Δfst4 | 12-day | 2673121 | up | GO:0020037 | 0,000874663 | heme binding                                         |
| Δfst4 | 12-day | 2695849 | up | GO:0020037 | 0,000874663 | heme binding                                         |
| Δfst4 | 12-day | 2703965 | up | GO:0020037 | 0,000874663 | heme binding                                         |
| Δfst4 | 12-day | 256167  | up | GO:0005215 | 0,000874663 | transporter activity                                 |



|       |        |         |    |            |             |                      |
|-------|--------|---------|----|------------|-------------|----------------------|
| Δfst4 | 12-day | 1147635 | up | GO:0005215 | 0,000874663 | transporter activity |
| Δfst4 | 12-day | 1196424 | up | GO:0005215 | 0,000874663 | transporter activity |
| Δfst4 | 12-day | 1234296 | up | GO:0005215 | 0,000874663 | transporter activity |
| Δfst4 | 12-day | 1296620 | up | GO:0005215 | 0,000874663 | transporter activity |
| Δfst4 | 12-day | 2481323 | up | GO:0005215 | 0,000874663 | transporter activity |
| Δfst4 | 12-day | 2490525 | up | GO:0005215 | 0,000874663 | transporter activity |
| Δfst4 | 12-day | 2496627 | up | GO:0005215 | 0,000874663 | transporter activity |
| Δfst4 | 12-day | 2499364 | up | GO:0005215 | 0,000874663 | transporter activity |
| Δfst4 | 12-day | 2499677 | up | GO:0005215 | 0,000874663 | transporter activity |
| Δfst4 | 12-day | 2502284 | up | GO:0005215 | 0,000874663 | transporter activity |
| Δfst4 | 12-day | 2508421 | up | GO:0005215 | 0,000874663 | transporter activity |
| Δfst4 | 12-day | 2515031 | up | GO:0005215 | 0,000874663 | transporter activity |
| Δfst4 | 12-day | 2543516 | up | GO:0005215 | 0,000874663 | transporter activity |
| Δfst4 | 12-day | 2564524 | up | GO:0005215 | 0,000874663 | transporter activity |
| Δfst4 | 12-day | 2605636 | up | GO:0005215 | 0,000874663 | transporter activity |
| Δfst4 | 12-day | 2611816 | up | GO:0005215 | 0,000874663 | transporter activity |
| Δfst4 | 12-day | 2615463 | up | GO:0005215 | 0,000874663 | transporter activity |
| Δfst4 | 12-day | 2616961 | up | GO:0005215 | 0,000874663 | transporter activity |
| Δfst4 | 12-day | 2617636 | up | GO:0005215 | 0,000874663 | transporter activity |
| Δfst4 | 12-day | 2618842 | up | GO:0005215 | 0,000874663 | transporter activity |
| Δfst4 | 12-day | 2619010 | up | GO:0005215 | 0,000874663 | transporter activity |
| Δfst4 | 12-day | 2627072 | up | GO:0005215 | 0,000874663 | transporter activity |
| Δfst4 | 12-day | 2628098 | up | GO:0005215 | 0,000874663 | transporter activity |
| Δfst4 | 12-day | 2630257 | up | GO:0005215 | 0,000874663 | transporter activity |
| Δfst4 | 12-day | 2631348 | up | GO:0005215 | 0,000874663 | transporter activity |
| Δfst4 | 12-day | 2632105 | up | GO:0005215 | 0,000874663 | transporter activity |
| Δfst4 | 12-day | 2633206 | up | GO:0005215 | 0,000874663 | transporter activity |
| Δfst4 | 12-day | 2633212 | up | GO:0005215 | 0,000874663 | transporter activity |
| Δfst4 | 12-day | 2633596 | up | GO:0005215 | 0,000874663 | transporter activity |
| Δfst4 | 12-day | 2637652 | up | GO:0005215 | 0,000874663 | transporter activity |
| Δfst4 | 12-day | 2660764 | up | GO:0005215 | 0,000874663 | transporter activity |
| Δfst4 | 12-day | 2663452 | up | GO:0005215 | 0,000874663 | transporter activity |
| Δfst4 | 12-day | 2698170 | up | GO:0005215 | 0,000874663 | transporter activity |
| Δfst4 | 12-day | 2704067 | up | GO:0005215 | 0,000874663 | transporter activity |

|       |        |         |    |            |             |                                   |
|-------|--------|---------|----|------------|-------------|-----------------------------------|
| Δfst4 | 12-day | 2749899 | up | GO:0005215 | 0,000874663 | transporter activity              |
| Δfst4 | 12-day | 1120318 | up | GO:0050381 | 0,000874663 | unspecific monooxygenase activity |
| Δfst4 | 12-day | 1188813 | up | GO:0050381 | 0,000874663 | unspecific monooxygenase activity |
| Δfst4 | 12-day | 2491624 | up | GO:0050381 | 0,000874663 | unspecific monooxygenase activity |
| Δfst4 | 12-day | 2559987 | up | GO:0050381 | 0,000874663 | unspecific monooxygenase activity |
| Δfst4 | 12-day | 2614692 | up | GO:0050381 | 0,000874663 | unspecific monooxygenase activity |
| Δfst4 | 12-day | 2619716 | up | GO:0050381 | 0,000874663 | unspecific monooxygenase activity |
| Δfst4 | 12-day | 2624973 | up | GO:0050381 | 0,000874663 | unspecific monooxygenase activity |
| Δfst4 | 12-day | 2625023 | up | GO:0050381 | 0,000874663 | unspecific monooxygenase activity |
| Δfst4 | 12-day | 2637467 | up | GO:0050381 | 0,000874663 | unspecific monooxygenase activity |
| Δfst4 | 12-day | 2666440 | up | GO:0050381 | 0,000874663 | unspecific monooxygenase activity |
| Δfst4 | 12-day | 2703965 | up | GO:0050381 | 0,000874663 | unspecific monooxygenase activity |
| Δfst4 | 12-day | 1120318 | up | GO:0004497 | 0,001709546 | monooxygenase activity            |
| Δfst4 | 12-day | 1147397 | up | GO:0004497 | 0,001709546 | monooxygenase activity            |
| Δfst4 | 12-day | 1173144 | up | GO:0004497 | 0,001709546 | monooxygenase activity            |
| Δfst4 | 12-day | 1188813 | up | GO:0004497 | 0,001709546 | monooxygenase activity            |
| Δfst4 | 12-day | 1342670 | up | GO:0004497 | 0,001709546 | monooxygenase activity            |
| Δfst4 | 12-day | 2213880 | up | GO:0004497 | 0,001709546 | monooxygenase activity            |
| Δfst4 | 12-day | 2364606 | up | GO:0004497 | 0,001709546 | monooxygenase activity            |
| Δfst4 | 12-day | 2490194 | up | GO:0004497 | 0,001709546 | monooxygenase activity            |
| Δfst4 | 12-day | 2491624 | up | GO:0004497 | 0,001709546 | monooxygenase activity            |
| Δfst4 | 12-day | 2537529 | up | GO:0004497 | 0,001709546 | monooxygenase activity            |
| Δfst4 | 12-day | 2559987 | up | GO:0004497 | 0,001709546 | monooxygenase activity            |
| Δfst4 | 12-day | 2573393 | up | GO:0004497 | 0,001709546 | monooxygenase activity            |
| Δfst4 | 12-day | 2573396 | up | GO:0004497 | 0,001709546 | monooxygenase activity            |
| Δfst4 | 12-day | 2614692 | up | GO:0004497 | 0,001709546 | monooxygenase activity            |
| Δfst4 | 12-day | 2619716 | up | GO:0004497 | 0,001709546 | monooxygenase activity            |
| Δfst4 | 12-day | 2619840 | up | GO:0004497 | 0,001709546 | monooxygenase activity            |
| Δfst4 | 12-day | 2624973 | up | GO:0004497 | 0,001709546 | monooxygenase activity            |
| Δfst4 | 12-day | 2625023 | up | GO:0004497 | 0,001709546 | monooxygenase activity            |
| Δfst4 | 12-day | 2626362 | up | GO:0004497 | 0,001709546 | monooxygenase activity            |
| Δfst4 | 12-day | 2628300 | up | GO:0004497 | 0,001709546 | monooxygenase activity            |
| Δfst4 | 12-day | 2629864 | up | GO:0004497 | 0,001709546 | monooxygenase activity            |
| Δfst4 | 12-day | 2635870 | up | GO:0004497 | 0,001709546 | monooxygenase activity            |

|       |        |         |    |            |             |                        |
|-------|--------|---------|----|------------|-------------|------------------------|
| Δfst4 | 12-day | 2635949 | up | GO:0004497 | 0,001709546 | monooxygenase activity |
| Δfst4 | 12-day | 2637467 | up | GO:0004497 | 0,001709546 | monooxygenase activity |
| Δfst4 | 12-day | 2638282 | up | GO:0004497 | 0,001709546 | monooxygenase activity |
| Δfst4 | 12-day | 2640550 | up | GO:0004497 | 0,001709546 | monooxygenase activity |
| Δfst4 | 12-day | 2666440 | up | GO:0004497 | 0,001709546 | monooxygenase activity |
| Δfst4 | 12-day | 2695849 | up | GO:0004497 | 0,001709546 | monooxygenase activity |
| Δfst4 | 12-day | 2703927 | up | GO:0004497 | 0,001709546 | monooxygenase activity |
| Δfst4 | 12-day | 2703965 | up | GO:0004497 | 0,001709546 | monooxygenase activity |
| Δfst4 | 12-day | 1120318 | up | GO:0006118 | 0,006467074 | electron transport     |
| Δfst4 | 12-day | 1147397 | up | GO:0006118 | 0,006467074 | electron transport     |
| Δfst4 | 12-day | 1173144 | up | GO:0006118 | 0,006467074 | electron transport     |
| Δfst4 | 12-day | 1188813 | up | GO:0006118 | 0,006467074 | electron transport     |
| Δfst4 | 12-day | 1215660 | up | GO:0006118 | 0,006467074 | electron transport     |
| Δfst4 | 12-day | 1342670 | up | GO:0006118 | 0,006467074 | electron transport     |
| Δfst4 | 12-day | 2213880 | up | GO:0006118 | 0,006467074 | electron transport     |
| Δfst4 | 12-day | 2364606 | up | GO:0006118 | 0,006467074 | electron transport     |
| Δfst4 | 12-day | 2457440 | up | GO:0006118 | 0,006467074 | electron transport     |
| Δfst4 | 12-day | 2490194 | up | GO:0006118 | 0,006467074 | electron transport     |
| Δfst4 | 12-day | 2490518 | up | GO:0006118 | 0,006467074 | electron transport     |
| Δfst4 | 12-day | 2491624 | up | GO:0006118 | 0,006467074 | electron transport     |
| Δfst4 | 12-day | 2499521 | up | GO:0006118 | 0,006467074 | electron transport     |
| Δfst4 | 12-day | 2505277 | up | GO:0006118 | 0,006467074 | electron transport     |
| Δfst4 | 12-day | 2507628 | up | GO:0006118 | 0,006467074 | electron transport     |
| Δfst4 | 12-day | 2525011 | up | GO:0006118 | 0,006467074 | electron transport     |
| Δfst4 | 12-day | 2537529 | up | GO:0006118 | 0,006467074 | electron transport     |
| Δfst4 | 12-day | 2559987 | up | GO:0006118 | 0,006467074 | electron transport     |
| Δfst4 | 12-day | 2571870 | up | GO:0006118 | 0,006467074 | electron transport     |
| Δfst4 | 12-day | 2573393 | up | GO:0006118 | 0,006467074 | electron transport     |
| Δfst4 | 12-day | 2573396 | up | GO:0006118 | 0,006467074 | electron transport     |
| Δfst4 | 12-day | 2576903 | up | GO:0006118 | 0,006467074 | electron transport     |
| Δfst4 | 12-day | 2594205 | up | GO:0006118 | 0,006467074 | electron transport     |
| Δfst4 | 12-day | 2605889 | up | GO:0006118 | 0,006467074 | electron transport     |
| Δfst4 | 12-day | 2611761 | up | GO:0006118 | 0,006467074 | electron transport     |
| Δfst4 | 12-day | 2612998 | up | GO:0006118 | 0,006467074 | electron transport     |

|       |        |         |    |            |             |                                   |
|-------|--------|---------|----|------------|-------------|-----------------------------------|
| Δfst4 | 12-day | 2614692 | up | GO:0006118 | 0,006467074 | electron transport                |
| Δfst4 | 12-day | 2615184 | up | GO:0006118 | 0,006467074 | electron transport                |
| Δfst4 | 12-day | 2619716 | up | GO:0006118 | 0,006467074 | electron transport                |
| Δfst4 | 12-day | 2619840 | up | GO:0006118 | 0,006467074 | electron transport                |
| Δfst4 | 12-day | 2620726 | up | GO:0006118 | 0,006467074 | electron transport                |
| Δfst4 | 12-day | 2622259 | up | GO:0006118 | 0,006467074 | electron transport                |
| Δfst4 | 12-day | 2622733 | up | GO:0006118 | 0,006467074 | electron transport                |
| Δfst4 | 12-day | 2622740 | up | GO:0006118 | 0,006467074 | electron transport                |
| Δfst4 | 12-day | 2624973 | up | GO:0006118 | 0,006467074 | electron transport                |
| Δfst4 | 12-day | 2625023 | up | GO:0006118 | 0,006467074 | electron transport                |
| Δfst4 | 12-day | 2626362 | up | GO:0006118 | 0,006467074 | electron transport                |
| Δfst4 | 12-day | 2628120 | up | GO:0006118 | 0,006467074 | electron transport                |
| Δfst4 | 12-day | 2628300 | up | GO:0006118 | 0,006467074 | electron transport                |
| Δfst4 | 12-day | 2629864 | up | GO:0006118 | 0,006467074 | electron transport                |
| Δfst4 | 12-day | 2635870 | up | GO:0006118 | 0,006467074 | electron transport                |
| Δfst4 | 12-day | 2635949 | up | GO:0006118 | 0,006467074 | electron transport                |
| Δfst4 | 12-day | 2637467 | up | GO:0006118 | 0,006467074 | electron transport                |
| Δfst4 | 12-day | 2638282 | up | GO:0006118 | 0,006467074 | electron transport                |
| Δfst4 | 12-day | 2638473 | up | GO:0006118 | 0,006467074 | electron transport                |
| Δfst4 | 12-day | 2640550 | up | GO:0006118 | 0,006467074 | electron transport                |
| Δfst4 | 12-day | 2643274 | up | GO:0006118 | 0,006467074 | electron transport                |
| Δfst4 | 12-day | 2666009 | up | GO:0006118 | 0,006467074 | electron transport                |
| Δfst4 | 12-day | 2666440 | up | GO:0006118 | 0,006467074 | electron transport                |
| Δfst4 | 12-day | 2667289 | up | GO:0006118 | 0,006467074 | electron transport                |
| Δfst4 | 12-day | 2695849 | up | GO:0006118 | 0,006467074 | electron transport                |
| Δfst4 | 12-day | 2698211 | up | GO:0006118 | 0,006467074 | electron transport                |
| Δfst4 | 12-day | 2703927 | up | GO:0006118 | 0,006467074 | electron transport                |
| Δfst4 | 12-day | 2703965 | up | GO:0006118 | 0,006467074 | electron transport                |
| Δfst4 | 12-day | 1147635 | up | GO:0005351 | 0,008205461 | sugar:hydrogen symporter activity |
| Δfst4 | 12-day | 2499677 | up | GO:0005351 | 0,008205461 | sugar:hydrogen symporter activity |
| Δfst4 | 12-day | 2515031 | up | GO:0005351 | 0,008205461 | sugar:hydrogen symporter activity |
| Δfst4 | 12-day | 2610180 | up | GO:0005351 | 0,008205461 | sugar:hydrogen symporter activity |
| Δfst4 | 12-day | 2619010 | up | GO:0005351 | 0,008205461 | sugar:hydrogen symporter activity |
| Δfst4 | 12-day | 2704067 | up | GO:0005351 | 0,008205461 | sugar:hydrogen symporter activity |

|       |        |         |    |            |             |                                   |
|-------|--------|---------|----|------------|-------------|-----------------------------------|
| Δfst4 | 12-day | 2749899 | up | GO:0005351 | 0,008205461 | sugar:hydrogen symporter activity |
| Δfst4 | 12-day | 2521109 | up | GO:0008236 | 0,008205461 | serine-type peptidase activity    |
| Δfst4 | 12-day | 2616091 | up | GO:0008236 | 0,008205461 | serine-type peptidase activity    |
| Δfst4 | 12-day | 2627176 | up | GO:0008236 | 0,008205461 | serine-type peptidase activity    |
| Δfst4 | 12-day | 1147635 | up | GO:0008643 | 0,010579492 | carbohydrate transport            |
| Δfst4 | 12-day | 2499677 | up | GO:0008643 | 0,010579492 | carbohydrate transport            |
| Δfst4 | 12-day | 2515031 | up | GO:0008643 | 0,010579492 | carbohydrate transport            |
| Δfst4 | 12-day | 2619010 | up | GO:0008643 | 0,010579492 | carbohydrate transport            |
| Δfst4 | 12-day | 2704067 | up | GO:0008643 | 0,010579492 | carbohydrate transport            |
| Δfst4 | 12-day | 2749899 | up | GO:0008643 | 0,010579492 | carbohydrate transport            |
| Δfst4 | 12-day | 2703529 | up | GO:0004222 | 0,015918997 | metalloendopeptidase activity     |
| Δfst4 | 12-day | 1147635 | up | GO:0008733 | 0,015918997 | L-arabinose isomerase activity    |
| Δfst4 | 12-day | 2499677 | up | GO:0008733 | 0,015918997 | L-arabinose isomerase activity    |
| Δfst4 | 12-day | 2515031 | up | GO:0008733 | 0,015918997 | L-arabinose isomerase activity    |
| Δfst4 | 12-day | 2564524 | up | GO:0008733 | 0,015918997 | L-arabinose isomerase activity    |
| Δfst4 | 12-day | 2619010 | up | GO:0008733 | 0,015918997 | L-arabinose isomerase activity    |
| Δfst4 | 12-day | 2704067 | up | GO:0008733 | 0,015918997 | L-arabinose isomerase activity    |
| Δfst4 | 12-day | 2749899 | up | GO:0008733 | 0,015918997 | L-arabinose isomerase activity    |
| Δfst4 | 12-day | 256167  | up | GO:0016021 | 0,026975913 | integral to membrane              |
| Δfst4 | 12-day | 1147635 | up | GO:0016021 | 0,026975913 | integral to membrane              |
| Δfst4 | 12-day | 1163017 | up | GO:0016021 | 0,026975913 | integral to membrane              |
| Δfst4 | 12-day | 1181112 | up | GO:0016021 | 0,026975913 | integral to membrane              |
| Δfst4 | 12-day | 1234296 | up | GO:0016021 | 0,026975913 | integral to membrane              |
| Δfst4 | 12-day | 1296620 | up | GO:0016021 | 0,026975913 | integral to membrane              |
| Δfst4 | 12-day | 2481323 | up | GO:0016021 | 0,026975913 | integral to membrane              |
| Δfst4 | 12-day | 2491032 | up | GO:0016021 | 0,026975913 | integral to membrane              |
| Δfst4 | 12-day | 2493556 | up | GO:0016021 | 0,026975913 | integral to membrane              |
| Δfst4 | 12-day | 2496627 | up | GO:0016021 | 0,026975913 | integral to membrane              |
| Δfst4 | 12-day | 2499364 | up | GO:0016021 | 0,026975913 | integral to membrane              |
| Δfst4 | 12-day | 2499677 | up | GO:0016021 | 0,026975913 | integral to membrane              |
| Δfst4 | 12-day | 2508421 | up | GO:0016021 | 0,026975913 | integral to membrane              |
| Δfst4 | 12-day | 2515031 | up | GO:0016021 | 0,026975913 | integral to membrane              |
| Δfst4 | 12-day | 2540007 | up | GO:0016021 | 0,026975913 | integral to membrane              |
| Δfst4 | 12-day | 2543516 | up | GO:0016021 | 0,026975913 | integral to membrane              |

|       |        |         |    |            |             |                      |
|-------|--------|---------|----|------------|-------------|----------------------|
| Δfst4 | 12-day | 2559621 | up | GO:0016021 | 0,026975913 | integral to membrane |
| Δfst4 | 12-day | 2564524 | up | GO:0016021 | 0,026975913 | integral to membrane |
| Δfst4 | 12-day | 2566280 | up | GO:0016021 | 0,026975913 | integral to membrane |
| Δfst4 | 12-day | 2604210 | up | GO:0016021 | 0,026975913 | integral to membrane |
| Δfst4 | 12-day | 2605636 | up | GO:0016021 | 0,026975913 | integral to membrane |
| Δfst4 | 12-day | 2611816 | up | GO:0016021 | 0,026975913 | integral to membrane |
| Δfst4 | 12-day | 2616961 | up | GO:0016021 | 0,026975913 | integral to membrane |
| Δfst4 | 12-day | 2617636 | up | GO:0016021 | 0,026975913 | integral to membrane |
| Δfst4 | 12-day | 2618122 | up | GO:0016021 | 0,026975913 | integral to membrane |
| Δfst4 | 12-day | 2618842 | up | GO:0016021 | 0,026975913 | integral to membrane |
| Δfst4 | 12-day | 2618885 | up | GO:0016021 | 0,026975913 | integral to membrane |
| Δfst4 | 12-day | 2619010 | up | GO:0016021 | 0,026975913 | integral to membrane |
| Δfst4 | 12-day | 2621209 | up | GO:0016021 | 0,026975913 | integral to membrane |
| Δfst4 | 12-day | 2621533 | up | GO:0016021 | 0,026975913 | integral to membrane |
| Δfst4 | 12-day | 2621626 | up | GO:0016021 | 0,026975913 | integral to membrane |
| Δfst4 | 12-day | 2622310 | up | GO:0016021 | 0,026975913 | integral to membrane |
| Δfst4 | 12-day | 2625385 | up | GO:0016021 | 0,026975913 | integral to membrane |
| Δfst4 | 12-day | 2626360 | up | GO:0016021 | 0,026975913 | integral to membrane |
| Δfst4 | 12-day | 2626581 | up | GO:0016021 | 0,026975913 | integral to membrane |
| Δfst4 | 12-day | 2630257 | up | GO:0016021 | 0,026975913 | integral to membrane |
| Δfst4 | 12-day | 2631348 | up | GO:0016021 | 0,026975913 | integral to membrane |
| Δfst4 | 12-day | 2632105 | up | GO:0016021 | 0,026975913 | integral to membrane |
| Δfst4 | 12-day | 2632855 | up | GO:0016021 | 0,026975913 | integral to membrane |
| Δfst4 | 12-day | 2633206 | up | GO:0016021 | 0,026975913 | integral to membrane |
| Δfst4 | 12-day | 2633212 | up | GO:0016021 | 0,026975913 | integral to membrane |
| Δfst4 | 12-day | 2635198 | up | GO:0016021 | 0,026975913 | integral to membrane |
| Δfst4 | 12-day | 2635448 | up | GO:0016021 | 0,026975913 | integral to membrane |
| Δfst4 | 12-day | 2637652 | up | GO:0016021 | 0,026975913 | integral to membrane |
| Δfst4 | 12-day | 2642542 | up | GO:0016021 | 0,026975913 | integral to membrane |
| Δfst4 | 12-day | 2642967 | up | GO:0016021 | 0,026975913 | integral to membrane |
| Δfst4 | 12-day | 2660764 | up | GO:0016021 | 0,026975913 | integral to membrane |
| Δfst4 | 12-day | 2663452 | up | GO:0016021 | 0,026975913 | integral to membrane |
| Δfst4 | 12-day | 2675859 | up | GO:0016021 | 0,026975913 | integral to membrane |
| Δfst4 | 12-day | 2698170 | up | GO:0016021 | 0,026975913 | integral to membrane |

|       |        |         |      |            |             |                                              |
|-------|--------|---------|------|------------|-------------|----------------------------------------------|
| Δfst4 | 12-day | 2704067 | up   | GO:0016021 | 0,026975913 | integral to membrane                         |
| Δfst4 | 12-day | 2733418 | up   | GO:0016021 | 0,026975913 | integral to membrane                         |
| Δfst4 | 12-day | 2749899 | up   | GO:0016021 | 0,026975913 | integral to membrane                         |
| Δfst4 | 12-day | 2750441 | up   | GO:0016021 | 0,026975913 | integral to membrane                         |
| Δfst4 | 12-day | 2642810 | up   | GO:0004555 | 0,039301358 | alpha,alpha-trehalase activity               |
| Δfst4 | 12-day | 2634281 | up   | GO:0008678 | 0,039301358 | 2-deoxy-D-gluconate 3-dehydrogenase activity |
| Δfst4 | 12-day | 2642810 | up   | GO:0005991 | 0,039301358 | trehalose metabolic process                  |
| Δfst4 | 12-day | 237513  | down | GO:0016491 | 5,46E-11    | oxidoreductase activity                      |
| Δfst4 | 12-day | 257768  | down | GO:0016491 | 5,46E-11    | oxidoreductase activity                      |
| Δfst4 | 12-day | 1152293 | down | GO:0016491 | 5,46E-11    | oxidoreductase activity                      |
| Δfst4 | 12-day | 2255031 | down | GO:0016491 | 5,46E-11    | oxidoreductase activity                      |
| Δfst4 | 12-day | 2333133 | down | GO:0016491 | 5,46E-11    | oxidoreductase activity                      |
| Δfst4 | 12-day | 2495855 | down | GO:0016491 | 5,46E-11    | oxidoreductase activity                      |
| Δfst4 | 12-day | 2503108 | down | GO:0016491 | 5,46E-11    | oxidoreductase activity                      |
| Δfst4 | 12-day | 2504654 | down | GO:0016491 | 5,46E-11    | oxidoreductase activity                      |
| Δfst4 | 12-day | 2507164 | down | GO:0016491 | 5,46E-11    | oxidoreductase activity                      |
| Δfst4 | 12-day | 2516444 | down | GO:0016491 | 5,46E-11    | oxidoreductase activity                      |
| Δfst4 | 12-day | 2524219 | down | GO:0016491 | 5,46E-11    | oxidoreductase activity                      |
| Δfst4 | 12-day | 2532967 | down | GO:0016491 | 5,46E-11    | oxidoreductase activity                      |
| Δfst4 | 12-day | 2538948 | down | GO:0016491 | 5,46E-11    | oxidoreductase activity                      |
| Δfst4 | 12-day | 2604174 | down | GO:0016491 | 5,46E-11    | oxidoreductase activity                      |
| Δfst4 | 12-day | 2604326 | down | GO:0016491 | 5,46E-11    | oxidoreductase activity                      |
| Δfst4 | 12-day | 2605752 | down | GO:0016491 | 5,46E-11    | oxidoreductase activity                      |
| Δfst4 | 12-day | 2605787 | down | GO:0016491 | 5,46E-11    | oxidoreductase activity                      |
| Δfst4 | 12-day | 2606988 | down | GO:0016491 | 5,46E-11    | oxidoreductase activity                      |
| Δfst4 | 12-day | 2608048 | down | GO:0016491 | 5,46E-11    | oxidoreductase activity                      |
| Δfst4 | 12-day | 2609840 | down | GO:0016491 | 5,46E-11    | oxidoreductase activity                      |
| Δfst4 | 12-day | 2610587 | down | GO:0016491 | 5,46E-11    | oxidoreductase activity                      |
| Δfst4 | 12-day | 2610599 | down | GO:0016491 | 5,46E-11    | oxidoreductase activity                      |
| Δfst4 | 12-day | 2612591 | down | GO:0016491 | 5,46E-11    | oxidoreductase activity                      |
| Δfst4 | 12-day | 2614759 | down | GO:0016491 | 5,46E-11    | oxidoreductase activity                      |
| Δfst4 | 12-day | 2616880 | down | GO:0016491 | 5,46E-11    | oxidoreductase activity                      |
| Δfst4 | 12-day | 2616916 | down | GO:0016491 | 5,46E-11    | oxidoreductase activity                      |
| Δfst4 | 12-day | 2618455 | down | GO:0016491 | 5,46E-11    | oxidoreductase activity                      |

|       |        |         |      |            |          |                         |
|-------|--------|---------|------|------------|----------|-------------------------|
| Δfst4 | 12-day | 2621873 | down | GO:0016491 | 5,46E-11 | oxidoreductase activity |
| Δfst4 | 12-day | 2622063 | down | GO:0016491 | 5,46E-11 | oxidoreductase activity |
| Δfst4 | 12-day | 2622616 | down | GO:0016491 | 5,46E-11 | oxidoreductase activity |
| Δfst4 | 12-day | 2623301 | down | GO:0016491 | 5,46E-11 | oxidoreductase activity |
| Δfst4 | 12-day | 2625561 | down | GO:0016491 | 5,46E-11 | oxidoreductase activity |
| Δfst4 | 12-day | 2629526 | down | GO:0016491 | 5,46E-11 | oxidoreductase activity |
| Δfst4 | 12-day | 2629948 | down | GO:0016491 | 5,46E-11 | oxidoreductase activity |
| Δfst4 | 12-day | 2630637 | down | GO:0016491 | 5,46E-11 | oxidoreductase activity |
| Δfst4 | 12-day | 2631774 | down | GO:0016491 | 5,46E-11 | oxidoreductase activity |
| Δfst4 | 12-day | 2633167 | down | GO:0016491 | 5,46E-11 | oxidoreductase activity |
| Δfst4 | 12-day | 2633632 | down | GO:0016491 | 5,46E-11 | oxidoreductase activity |
| Δfst4 | 12-day | 2634450 | down | GO:0016491 | 5,46E-11 | oxidoreductase activity |
| Δfst4 | 12-day | 2637104 | down | GO:0016491 | 5,46E-11 | oxidoreductase activity |
| Δfst4 | 12-day | 2638484 | down | GO:0016491 | 5,46E-11 | oxidoreductase activity |
| Δfst4 | 12-day | 2641506 | down | GO:0016491 | 5,46E-11 | oxidoreductase activity |
| Δfst4 | 12-day | 2641520 | down | GO:0016491 | 5,46E-11 | oxidoreductase activity |
| Δfst4 | 12-day | 2643891 | down | GO:0016491 | 5,46E-11 | oxidoreductase activity |
| Δfst4 | 12-day | 2644330 | down | GO:0016491 | 5,46E-11 | oxidoreductase activity |
| Δfst4 | 12-day | 2644430 | down | GO:0016491 | 5,46E-11 | oxidoreductase activity |
| Δfst4 | 12-day | 2661224 | down | GO:0016491 | 5,46E-11 | oxidoreductase activity |
| Δfst4 | 12-day | 2663372 | down | GO:0016491 | 5,46E-11 | oxidoreductase activity |
| Δfst4 | 12-day | 2671376 | down | GO:0016491 | 5,46E-11 | oxidoreductase activity |
| Δfst4 | 12-day | 2688622 | down | GO:0016491 | 5,46E-11 | oxidoreductase activity |
| Δfst4 | 12-day | 2697968 | down | GO:0016491 | 5,46E-11 | oxidoreductase activity |
| Δfst4 | 12-day | 2705421 | down | GO:0016491 | 5,46E-11 | oxidoreductase activity |
| Δfst4 | 12-day | 1152293 | down | GO:0008152 | 9,00E-08 | metabolic process       |
| Δfst4 | 12-day | 1200798 | down | GO:0008152 | 9,00E-08 | metabolic process       |
| Δfst4 | 12-day | 2255031 | down | GO:0008152 | 9,00E-08 | metabolic process       |
| Δfst4 | 12-day | 2333133 | down | GO:0008152 | 9,00E-08 | metabolic process       |
| Δfst4 | 12-day | 2485727 | down | GO:0008152 | 9,00E-08 | metabolic process       |
| Δfst4 | 12-day | 2492878 | down | GO:0008152 | 9,00E-08 | metabolic process       |
| Δfst4 | 12-day | 2495855 | down | GO:0008152 | 9,00E-08 | metabolic process       |
| Δfst4 | 12-day | 2507164 | down | GO:0008152 | 9,00E-08 | metabolic process       |
| Δfst4 | 12-day | 2511020 | down | GO:0008152 | 9,00E-08 | metabolic process       |



|       |        |         |      |            |          |                   |
|-------|--------|---------|------|------------|----------|-------------------|
| Δfst4 | 12-day | 2533120 | down | GO:0008152 | 9,00E-08 | metabolic process |
| Δfst4 | 12-day | 2553610 | down | GO:0008152 | 9,00E-08 | metabolic process |
| Δfst4 | 12-day | 2605752 | down | GO:0008152 | 9,00E-08 | metabolic process |
| Δfst4 | 12-day | 2605787 | down | GO:0008152 | 9,00E-08 | metabolic process |
| Δfst4 | 12-day | 2606988 | down | GO:0008152 | 9,00E-08 | metabolic process |
| Δfst4 | 12-day | 2608048 | down | GO:0008152 | 9,00E-08 | metabolic process |
| Δfst4 | 12-day | 2609150 | down | GO:0008152 | 9,00E-08 | metabolic process |
| Δfst4 | 12-day | 2610587 | down | GO:0008152 | 9,00E-08 | metabolic process |
| Δfst4 | 12-day | 2610599 | down | GO:0008152 | 9,00E-08 | metabolic process |
| Δfst4 | 12-day | 2611306 | down | GO:0008152 | 9,00E-08 | metabolic process |
| Δfst4 | 12-day | 2612591 | down | GO:0008152 | 9,00E-08 | metabolic process |
| Δfst4 | 12-day | 2614759 | down | GO:0008152 | 9,00E-08 | metabolic process |
| Δfst4 | 12-day | 2615598 | down | GO:0008152 | 9,00E-08 | metabolic process |
| Δfst4 | 12-day | 2616602 | down | GO:0008152 | 9,00E-08 | metabolic process |
| Δfst4 | 12-day | 2616880 | down | GO:0008152 | 9,00E-08 | metabolic process |
| Δfst4 | 12-day | 2616916 | down | GO:0008152 | 9,00E-08 | metabolic process |
| Δfst4 | 12-day | 2618455 | down | GO:0008152 | 9,00E-08 | metabolic process |
| Δfst4 | 12-day | 2618904 | down | GO:0008152 | 9,00E-08 | metabolic process |
| Δfst4 | 12-day | 2619714 | down | GO:0008152 | 9,00E-08 | metabolic process |
| Δfst4 | 12-day | 2621873 | down | GO:0008152 | 9,00E-08 | metabolic process |
| Δfst4 | 12-day | 2622063 | down | GO:0008152 | 9,00E-08 | metabolic process |
| Δfst4 | 12-day | 2623062 | down | GO:0008152 | 9,00E-08 | metabolic process |
| Δfst4 | 12-day | 2623068 | down | GO:0008152 | 9,00E-08 | metabolic process |
| Δfst4 | 12-day | 2623301 | down | GO:0008152 | 9,00E-08 | metabolic process |
| Δfst4 | 12-day | 2624525 | down | GO:0008152 | 9,00E-08 | metabolic process |
| Δfst4 | 12-day | 2624675 | down | GO:0008152 | 9,00E-08 | metabolic process |
| Δfst4 | 12-day | 2625561 | down | GO:0008152 | 9,00E-08 | metabolic process |
| Δfst4 | 12-day | 2625706 | down | GO:0008152 | 9,00E-08 | metabolic process |
| Δfst4 | 12-day | 2625782 | down | GO:0008152 | 9,00E-08 | metabolic process |
| Δfst4 | 12-day | 2626510 | down | GO:0008152 | 9,00E-08 | metabolic process |
| Δfst4 | 12-day | 2629526 | down | GO:0008152 | 9,00E-08 | metabolic process |
| Δfst4 | 12-day | 2629548 | down | GO:0008152 | 9,00E-08 | metabolic process |
| Δfst4 | 12-day | 2631774 | down | GO:0008152 | 9,00E-08 | metabolic process |
| Δfst4 | 12-day | 2632206 | down | GO:0008152 | 9,00E-08 | metabolic process |

|       |        |         |      |            |          |                    |
|-------|--------|---------|------|------------|----------|--------------------|
| Δfst4 | 12-day | 2632611 | down | GO:0008152 | 9,00E-08 | metabolic process  |
| Δfst4 | 12-day | 2633167 | down | GO:0008152 | 9,00E-08 | metabolic process  |
| Δfst4 | 12-day | 2633632 | down | GO:0008152 | 9,00E-08 | metabolic process  |
| Δfst4 | 12-day | 2633644 | down | GO:0008152 | 9,00E-08 | metabolic process  |
| Δfst4 | 12-day | 2634450 | down | GO:0008152 | 9,00E-08 | metabolic process  |
| Δfst4 | 12-day | 2637088 | down | GO:0008152 | 9,00E-08 | metabolic process  |
| Δfst4 | 12-day | 2637104 | down | GO:0008152 | 9,00E-08 | metabolic process  |
| Δfst4 | 12-day | 2637643 | down | GO:0008152 | 9,00E-08 | metabolic process  |
| Δfst4 | 12-day | 2637668 | down | GO:0008152 | 9,00E-08 | metabolic process  |
| Δfst4 | 12-day | 2638484 | down | GO:0008152 | 9,00E-08 | metabolic process  |
| Δfst4 | 12-day | 2640484 | down | GO:0008152 | 9,00E-08 | metabolic process  |
| Δfst4 | 12-day | 2641506 | down | GO:0008152 | 9,00E-08 | metabolic process  |
| Δfst4 | 12-day | 2641520 | down | GO:0008152 | 9,00E-08 | metabolic process  |
| Δfst4 | 12-day | 2643891 | down | GO:0008152 | 9,00E-08 | metabolic process  |
| Δfst4 | 12-day | 2644330 | down | GO:0008152 | 9,00E-08 | metabolic process  |
| Δfst4 | 12-day | 2644430 | down | GO:0008152 | 9,00E-08 | metabolic process  |
| Δfst4 | 12-day | 2645207 | down | GO:0008152 | 9,00E-08 | metabolic process  |
| Δfst4 | 12-day | 2665516 | down | GO:0008152 | 9,00E-08 | metabolic process  |
| Δfst4 | 12-day | 2669046 | down | GO:0008152 | 9,00E-08 | metabolic process  |
| Δfst4 | 12-day | 2705421 | down | GO:0008152 | 9,00E-08 | metabolic process  |
| Δfst4 | 12-day | 2711060 | down | GO:0008152 | 9,00E-08 | metabolic process  |
| Δfst4 | 12-day | 2726410 | down | GO:0008152 | 9,00E-08 | metabolic process  |
| Δfst4 | 12-day | 85278   | down | GO:0003824 | 8,68E-07 | catalytic activity |
| Δfst4 | 12-day | 237513  | down | GO:0003824 | 8,68E-07 | catalytic activity |
| Δfst4 | 12-day | 1152293 | down | GO:0003824 | 8,68E-07 | catalytic activity |
| Δfst4 | 12-day | 1184723 | down | GO:0003824 | 8,68E-07 | catalytic activity |
| Δfst4 | 12-day | 1191999 | down | GO:0003824 | 8,68E-07 | catalytic activity |
| Δfst4 | 12-day | 1200798 | down | GO:0003824 | 8,68E-07 | catalytic activity |
| Δfst4 | 12-day | 2055308 | down | GO:0003824 | 8,68E-07 | catalytic activity |
| Δfst4 | 12-day | 2255031 | down | GO:0003824 | 8,68E-07 | catalytic activity |
| Δfst4 | 12-day | 2333133 | down | GO:0003824 | 8,68E-07 | catalytic activity |
| Δfst4 | 12-day | 2368049 | down | GO:0003824 | 8,68E-07 | catalytic activity |
| Δfst4 | 12-day | 2484815 | down | GO:0003824 | 8,68E-07 | catalytic activity |
| Δfst4 | 12-day | 2492878 | down | GO:0003824 | 8,68E-07 | catalytic activity |

|       |        |         |      |            |          |                    |
|-------|--------|---------|------|------------|----------|--------------------|
| Δfst4 | 12-day | 2495855 | down | GO:0003824 | 8,68E-07 | catalytic activity |
| Δfst4 | 12-day | 2511020 | down | GO:0003824 | 8,68E-07 | catalytic activity |
| Δfst4 | 12-day | 2513424 | down | GO:0003824 | 8,68E-07 | catalytic activity |
| Δfst4 | 12-day | 2516444 | down | GO:0003824 | 8,68E-07 | catalytic activity |
| Δfst4 | 12-day | 2598960 | down | GO:0003824 | 8,68E-07 | catalytic activity |
| Δfst4 | 12-day | 2605122 | down | GO:0003824 | 8,68E-07 | catalytic activity |
| Δfst4 | 12-day | 2605752 | down | GO:0003824 | 8,68E-07 | catalytic activity |
| Δfst4 | 12-day | 2605787 | down | GO:0003824 | 8,68E-07 | catalytic activity |
| Δfst4 | 12-day | 2606988 | down | GO:0003824 | 8,68E-07 | catalytic activity |
| Δfst4 | 12-day | 2608048 | down | GO:0003824 | 8,68E-07 | catalytic activity |
| Δfst4 | 12-day | 2610587 | down | GO:0003824 | 8,68E-07 | catalytic activity |
| Δfst4 | 12-day | 2610599 | down | GO:0003824 | 8,68E-07 | catalytic activity |
| Δfst4 | 12-day | 2612591 | down | GO:0003824 | 8,68E-07 | catalytic activity |
| Δfst4 | 12-day | 2614269 | down | GO:0003824 | 8,68E-07 | catalytic activity |
| Δfst4 | 12-day | 2614759 | down | GO:0003824 | 8,68E-07 | catalytic activity |
| Δfst4 | 12-day | 2615598 | down | GO:0003824 | 8,68E-07 | catalytic activity |
| Δfst4 | 12-day | 2616491 | down | GO:0003824 | 8,68E-07 | catalytic activity |
| Δfst4 | 12-day | 2616602 | down | GO:0003824 | 8,68E-07 | catalytic activity |
| Δfst4 | 12-day | 2616880 | down | GO:0003824 | 8,68E-07 | catalytic activity |
| Δfst4 | 12-day | 2616916 | down | GO:0003824 | 8,68E-07 | catalytic activity |
| Δfst4 | 12-day | 2618904 | down | GO:0003824 | 8,68E-07 | catalytic activity |
| Δfst4 | 12-day | 2618997 | down | GO:0003824 | 8,68E-07 | catalytic activity |
| Δfst4 | 12-day | 2619714 | down | GO:0003824 | 8,68E-07 | catalytic activity |
| Δfst4 | 12-day | 2621873 | down | GO:0003824 | 8,68E-07 | catalytic activity |
| Δfst4 | 12-day | 2622063 | down | GO:0003824 | 8,68E-07 | catalytic activity |
| Δfst4 | 12-day | 2623062 | down | GO:0003824 | 8,68E-07 | catalytic activity |
| Δfst4 | 12-day | 2623068 | down | GO:0003824 | 8,68E-07 | catalytic activity |
| Δfst4 | 12-day | 2623301 | down | GO:0003824 | 8,68E-07 | catalytic activity |
| Δfst4 | 12-day | 2624675 | down | GO:0003824 | 8,68E-07 | catalytic activity |
| Δfst4 | 12-day | 2625554 | down | GO:0003824 | 8,68E-07 | catalytic activity |
| Δfst4 | 12-day | 2625561 | down | GO:0003824 | 8,68E-07 | catalytic activity |
| Δfst4 | 12-day | 2625782 | down | GO:0003824 | 8,68E-07 | catalytic activity |
| Δfst4 | 12-day | 2626510 | down | GO:0003824 | 8,68E-07 | catalytic activity |
| Δfst4 | 12-day | 2628678 | down | GO:0003824 | 8,68E-07 | catalytic activity |

|       |        |         |      |            |          |                    |
|-------|--------|---------|------|------------|----------|--------------------|
| Δfst4 | 12-day | 2629526 | down | GO:0003824 | 8,68E-07 | catalytic activity |
| Δfst4 | 12-day | 2629548 | down | GO:0003824 | 8,68E-07 | catalytic activity |
| Δfst4 | 12-day | 2630634 | down | GO:0003824 | 8,68E-07 | catalytic activity |
| Δfst4 | 12-day | 2631920 | down | GO:0003824 | 8,68E-07 | catalytic activity |
| Δfst4 | 12-day | 2632206 | down | GO:0003824 | 8,68E-07 | catalytic activity |
| Δfst4 | 12-day | 2632611 | down | GO:0003824 | 8,68E-07 | catalytic activity |
| Δfst4 | 12-day | 2633144 | down | GO:0003824 | 8,68E-07 | catalytic activity |
| Δfst4 | 12-day | 2633162 | down | GO:0003824 | 8,68E-07 | catalytic activity |
| Δfst4 | 12-day | 2633167 | down | GO:0003824 | 8,68E-07 | catalytic activity |
| Δfst4 | 12-day | 2633632 | down | GO:0003824 | 8,68E-07 | catalytic activity |
| Δfst4 | 12-day | 2634450 | down | GO:0003824 | 8,68E-07 | catalytic activity |
| Δfst4 | 12-day | 2634918 | down | GO:0003824 | 8,68E-07 | catalytic activity |
| Δfst4 | 12-day | 2635216 | down | GO:0003824 | 8,68E-07 | catalytic activity |
| Δfst4 | 12-day | 2635219 | down | GO:0003824 | 8,68E-07 | catalytic activity |
| Δfst4 | 12-day | 2637088 | down | GO:0003824 | 8,68E-07 | catalytic activity |
| Δfst4 | 12-day | 2637104 | down | GO:0003824 | 8,68E-07 | catalytic activity |
| Δfst4 | 12-day | 2637668 | down | GO:0003824 | 8,68E-07 | catalytic activity |
| Δfst4 | 12-day | 2637783 | down | GO:0003824 | 8,68E-07 | catalytic activity |
| Δfst4 | 12-day | 2637845 | down | GO:0003824 | 8,68E-07 | catalytic activity |
| Δfst4 | 12-day | 2638484 | down | GO:0003824 | 8,68E-07 | catalytic activity |
| Δfst4 | 12-day | 2638783 | down | GO:0003824 | 8,68E-07 | catalytic activity |
| Δfst4 | 12-day | 2640484 | down | GO:0003824 | 8,68E-07 | catalytic activity |
| Δfst4 | 12-day | 2641506 | down | GO:0003824 | 8,68E-07 | catalytic activity |
| Δfst4 | 12-day | 2641520 | down | GO:0003824 | 8,68E-07 | catalytic activity |
| Δfst4 | 12-day | 2643891 | down | GO:0003824 | 8,68E-07 | catalytic activity |
| Δfst4 | 12-day | 2643902 | down | GO:0003824 | 8,68E-07 | catalytic activity |
| Δfst4 | 12-day | 2644330 | down | GO:0003824 | 8,68E-07 | catalytic activity |
| Δfst4 | 12-day | 2645207 | down | GO:0003824 | 8,68E-07 | catalytic activity |
| Δfst4 | 12-day | 2682976 | down | GO:0003824 | 8,68E-07 | catalytic activity |
| Δfst4 | 12-day | 2699217 | down | GO:0003824 | 8,68E-07 | catalytic activity |
| Δfst4 | 12-day | 2705421 | down | GO:0003824 | 8,68E-07 | catalytic activity |
| Δfst4 | 12-day | 2711060 | down | GO:0003824 | 8,68E-07 | catalytic activity |
| Δfst4 | 12-day | 2606344 | down | GO:0000786 | 1,52E-05 | nucleosome         |
| Δfst4 | 12-day | 2630193 | down | GO:0000786 | 1,52E-05 | nucleosome         |

|               |        |         |      |            |          |                             |
|---------------|--------|---------|------|------------|----------|-----------------------------|
| $\Delta$ fst4 | 12-day | 2068434 | down | GO:0030170 | 1,86E-05 | pyridoxal phosphate binding |
| $\Delta$ fst4 | 12-day | 2553610 | down | GO:0030170 | 1,86E-05 | pyridoxal phosphate binding |
| $\Delta$ fst4 | 12-day | 2606344 | down | GO:0006334 | 4,51E-05 | nucleosome assembly         |
| $\Delta$ fst4 | 12-day | 2630193 | down | GO:0006334 | 4,51E-05 | nucleosome assembly         |
| $\Delta$ fst4 | 12-day | 78628   | down | GO:0006118 | 5,21E-05 | electron transport          |
| $\Delta$ fst4 | 12-day | 81631   | down | GO:0006118 | 5,21E-05 | electron transport          |
| $\Delta$ fst4 | 12-day | 257768  | down | GO:0006118 | 5,21E-05 | electron transport          |
| $\Delta$ fst4 | 12-day | 1084300 | down | GO:0006118 | 5,21E-05 | electron transport          |
| $\Delta$ fst4 | 12-day | 1131542 | down | GO:0006118 | 5,21E-05 | electron transport          |
| $\Delta$ fst4 | 12-day | 1139445 | down | GO:0006118 | 5,21E-05 | electron transport          |
| $\Delta$ fst4 | 12-day | 1159597 | down | GO:0006118 | 5,21E-05 | electron transport          |
| $\Delta$ fst4 | 12-day | 1189794 | down | GO:0006118 | 5,21E-05 | electron transport          |
| $\Delta$ fst4 | 12-day | 2327903 | down | GO:0006118 | 5,21E-05 | electron transport          |
| $\Delta$ fst4 | 12-day | 2486680 | down | GO:0006118 | 5,21E-05 | electron transport          |
| $\Delta$ fst4 | 12-day | 2503108 | down | GO:0006118 | 5,21E-05 | electron transport          |
| $\Delta$ fst4 | 12-day | 2509716 | down | GO:0006118 | 5,21E-05 | electron transport          |
| $\Delta$ fst4 | 12-day | 2512276 | down | GO:0006118 | 5,21E-05 | electron transport          |
| $\Delta$ fst4 | 12-day | 2516208 | down | GO:0006118 | 5,21E-05 | electron transport          |
| $\Delta$ fst4 | 12-day | 2532967 | down | GO:0006118 | 5,21E-05 | electron transport          |
| $\Delta$ fst4 | 12-day | 2533120 | down | GO:0006118 | 5,21E-05 | electron transport          |
| $\Delta$ fst4 | 12-day | 2604628 | down | GO:0006118 | 5,21E-05 | electron transport          |
| $\Delta$ fst4 | 12-day | 2604735 | down | GO:0006118 | 5,21E-05 | electron transport          |
| $\Delta$ fst4 | 12-day | 2609840 | down | GO:0006118 | 5,21E-05 | electron transport          |
| $\Delta$ fst4 | 12-day | 2611234 | down | GO:0006118 | 5,21E-05 | electron transport          |
| $\Delta$ fst4 | 12-day | 2616301 | down | GO:0006118 | 5,21E-05 | electron transport          |
| $\Delta$ fst4 | 12-day | 2618455 | down | GO:0006118 | 5,21E-05 | electron transport          |
| $\Delta$ fst4 | 12-day | 2619674 | down | GO:0006118 | 5,21E-05 | electron transport          |
| $\Delta$ fst4 | 12-day | 2621855 | down | GO:0006118 | 5,21E-05 | electron transport          |
| $\Delta$ fst4 | 12-day | 2623196 | down | GO:0006118 | 5,21E-05 | electron transport          |
| $\Delta$ fst4 | 12-day | 2628312 | down | GO:0006118 | 5,21E-05 | electron transport          |
| $\Delta$ fst4 | 12-day | 2628651 | down | GO:0006118 | 5,21E-05 | electron transport          |
| $\Delta$ fst4 | 12-day | 2633167 | down | GO:0006118 | 5,21E-05 | electron transport          |
| $\Delta$ fst4 | 12-day | 2635487 | down | GO:0006118 | 5,21E-05 | electron transport          |
| $\Delta$ fst4 | 12-day | 2635869 | down | GO:0006118 | 5,21E-05 | electron transport          |

|       |        |         |      |            |             |                                     |
|-------|--------|---------|------|------------|-------------|-------------------------------------|
| Δfst4 | 12-day | 2637104 | down | GO:0006118 | 5,21E-05    | electron transport                  |
| Δfst4 | 12-day | 2637130 | down | GO:0006118 | 5,21E-05    | electron transport                  |
| Δfst4 | 12-day | 2638355 | down | GO:0006118 | 5,21E-05    | electron transport                  |
| Δfst4 | 12-day | 2639762 | down | GO:0006118 | 5,21E-05    | electron transport                  |
| Δfst4 | 12-day | 2644430 | down | GO:0006118 | 5,21E-05    | electron transport                  |
| Δfst4 | 12-day | 2662585 | down | GO:0006118 | 5,21E-05    | electron transport                  |
| Δfst4 | 12-day | 2663372 | down | GO:0006118 | 5,21E-05    | electron transport                  |
| Δfst4 | 12-day | 2668568 | down | GO:0006118 | 5,21E-05    | electron transport                  |
| Δfst4 | 12-day | 2671376 | down | GO:0006118 | 5,21E-05    | electron transport                  |
| Δfst4 | 12-day | 2688622 | down | GO:0006118 | 5,21E-05    | electron transport                  |
| Δfst4 | 12-day | 2703628 | down | GO:0006118 | 5,21E-05    | electron transport                  |
| Δfst4 | 12-day | 2753029 | down | GO:0006118 | 5,21E-05    | electron transport                  |
| Δfst4 | 12-day | 2746250 | down | GO:0005199 | 0,000295281 | structural constituent of cell wall |
| Δfst4 | 12-day | 2614257 | down | GO:0005618 | 0,000523114 | cell wall                           |
| Δfst4 | 12-day | 78628   | down | GO:0004497 | 0,000892414 | monooxygenase activity              |
| Δfst4 | 12-day | 81631   | down | GO:0004497 | 0,000892414 | monooxygenase activity              |
| Δfst4 | 12-day | 1131542 | down | GO:0004497 | 0,000892414 | monooxygenase activity              |
| Δfst4 | 12-day | 1139445 | down | GO:0004497 | 0,000892414 | monooxygenase activity              |
| Δfst4 | 12-day | 1159597 | down | GO:0004497 | 0,000892414 | monooxygenase activity              |
| Δfst4 | 12-day | 1189794 | down | GO:0004497 | 0,000892414 | monooxygenase activity              |
| Δfst4 | 12-day | 2327903 | down | GO:0004497 | 0,000892414 | monooxygenase activity              |
| Δfst4 | 12-day | 2486680 | down | GO:0004497 | 0,000892414 | monooxygenase activity              |
| Δfst4 | 12-day | 2512276 | down | GO:0004497 | 0,000892414 | monooxygenase activity              |
| Δfst4 | 12-day | 2516208 | down | GO:0004497 | 0,000892414 | monooxygenase activity              |
| Δfst4 | 12-day | 2604735 | down | GO:0004497 | 0,000892414 | monooxygenase activity              |
| Δfst4 | 12-day | 2611234 | down | GO:0004497 | 0,000892414 | monooxygenase activity              |
| Δfst4 | 12-day | 2616301 | down | GO:0004497 | 0,000892414 | monooxygenase activity              |
| Δfst4 | 12-day | 2618455 | down | GO:0004497 | 0,000892414 | monooxygenase activity              |
| Δfst4 | 12-day | 2619674 | down | GO:0004497 | 0,000892414 | monooxygenase activity              |
| Δfst4 | 12-day | 2623196 | down | GO:0004497 | 0,000892414 | monooxygenase activity              |
| Δfst4 | 12-day | 2628312 | down | GO:0004497 | 0,000892414 | monooxygenase activity              |
| Δfst4 | 12-day | 2628651 | down | GO:0004497 | 0,000892414 | monooxygenase activity              |
| Δfst4 | 12-day | 2635487 | down | GO:0004497 | 0,000892414 | monooxygenase activity              |
| Δfst4 | 12-day | 2635869 | down | GO:0004497 | 0,000892414 | monooxygenase activity              |

|       |        |         |      |            |             |                        |
|-------|--------|---------|------|------------|-------------|------------------------|
| Δfst4 | 12-day | 2637130 | down | GO:0004497 | 0,000892414 | monooxygenase activity |
| Δfst4 | 12-day | 2638355 | down | GO:0004497 | 0,000892414 | monooxygenase activity |
| Δfst4 | 12-day | 2644430 | down | GO:0004497 | 0,000892414 | monooxygenase activity |
| Δfst4 | 12-day | 2668568 | down | GO:0004497 | 0,000892414 | monooxygenase activity |
| Δfst4 | 12-day | 2703628 | down | GO:0004497 | 0,000892414 | monooxygenase activity |
| Δfst4 | 12-day | 2753029 | down | GO:0004497 | 0,000892414 | monooxygenase activity |
| Δfst4 | 12-day | 1093619 | down | GO:0006810 | 0,003047456 | transport              |
| Δfst4 | 12-day | 1144263 | down | GO:0006810 | 0,003047456 | transport              |
| Δfst4 | 12-day | 1154281 | down | GO:0006810 | 0,003047456 | transport              |
| Δfst4 | 12-day | 1166919 | down | GO:0006810 | 0,003047456 | transport              |
| Δfst4 | 12-day | 2145491 | down | GO:0006810 | 0,003047456 | transport              |
| Δfst4 | 12-day | 2162840 | down | GO:0006810 | 0,003047456 | transport              |
| Δfst4 | 12-day | 2481653 | down | GO:0006810 | 0,003047456 | transport              |
| Δfst4 | 12-day | 2485970 | down | GO:0006810 | 0,003047456 | transport              |
| Δfst4 | 12-day | 2492878 | down | GO:0006810 | 0,003047456 | transport              |
| Δfst4 | 12-day | 2501677 | down | GO:0006810 | 0,003047456 | transport              |
| Δfst4 | 12-day | 2504863 | down | GO:0006810 | 0,003047456 | transport              |
| Δfst4 | 12-day | 2509716 | down | GO:0006810 | 0,003047456 | transport              |
| Δfst4 | 12-day | 2516374 | down | GO:0006810 | 0,003047456 | transport              |
| Δfst4 | 12-day | 2520877 | down | GO:0006810 | 0,003047456 | transport              |
| Δfst4 | 12-day | 2525305 | down | GO:0006810 | 0,003047456 | transport              |
| Δfst4 | 12-day | 2543225 | down | GO:0006810 | 0,003047456 | transport              |
| Δfst4 | 12-day | 2550918 | down | GO:0006810 | 0,003047456 | transport              |
| Δfst4 | 12-day | 2607025 | down | GO:0006810 | 0,003047456 | transport              |
| Δfst4 | 12-day | 2613255 | down | GO:0006810 | 0,003047456 | transport              |
| Δfst4 | 12-day | 2616189 | down | GO:0006810 | 0,003047456 | transport              |
| Δfst4 | 12-day | 2616602 | down | GO:0006810 | 0,003047456 | transport              |
| Δfst4 | 12-day | 2617458 | down | GO:0006810 | 0,003047456 | transport              |
| Δfst4 | 12-day | 2621148 | down | GO:0006810 | 0,003047456 | transport              |
| Δfst4 | 12-day | 2622598 | down | GO:0006810 | 0,003047456 | transport              |
| Δfst4 | 12-day | 2623492 | down | GO:0006810 | 0,003047456 | transport              |
| Δfst4 | 12-day | 2626453 | down | GO:0006810 | 0,003047456 | transport              |
| Δfst4 | 12-day | 2626803 | down | GO:0006810 | 0,003047456 | transport              |
| Δfst4 | 12-day | 2627703 | down | GO:0006810 | 0,003047456 | transport              |

|       |        |         |      |            |             |                      |
|-------|--------|---------|------|------------|-------------|----------------------|
| Δfst4 | 12-day | 2628751 | down | GO:0006810 | 0,003047456 | transport            |
| Δfst4 | 12-day | 2629091 | down | GO:0006810 | 0,003047456 | transport            |
| Δfst4 | 12-day | 2633216 | down | GO:0006810 | 0,003047456 | transport            |
| Δfst4 | 12-day | 2636597 | down | GO:0006810 | 0,003047456 | transport            |
| Δfst4 | 12-day | 2637509 | down | GO:0006810 | 0,003047456 | transport            |
| Δfst4 | 12-day | 2661224 | down | GO:0006810 | 0,003047456 | transport            |
| Δfst4 | 12-day | 2662585 | down | GO:0006810 | 0,003047456 | transport            |
| Δfst4 | 12-day | 2681288 | down | GO:0006810 | 0,003047456 | transport            |
| Δfst4 | 12-day | 2701571 | down | GO:0006810 | 0,003047456 | transport            |
| Δfst4 | 12-day | 2712060 | down | GO:0006810 | 0,003047456 | transport            |
| Δfst4 | 12-day | 1093619 | down | GO:0005215 | 0,005405783 | transporter activity |
| Δfst4 | 12-day | 1144263 | down | GO:0005215 | 0,005405783 | transporter activity |
| Δfst4 | 12-day | 1154281 | down | GO:0005215 | 0,005405783 | transporter activity |
| Δfst4 | 12-day | 2145491 | down | GO:0005215 | 0,005405783 | transporter activity |
| Δfst4 | 12-day | 2162840 | down | GO:0005215 | 0,005405783 | transporter activity |
| Δfst4 | 12-day | 2481653 | down | GO:0005215 | 0,005405783 | transporter activity |
| Δfst4 | 12-day | 2485970 | down | GO:0005215 | 0,005405783 | transporter activity |
| Δfst4 | 12-day | 2492878 | down | GO:0005215 | 0,005405783 | transporter activity |
| Δfst4 | 12-day | 2501677 | down | GO:0005215 | 0,005405783 | transporter activity |
| Δfst4 | 12-day | 2504863 | down | GO:0005215 | 0,005405783 | transporter activity |
| Δfst4 | 12-day | 2509716 | down | GO:0005215 | 0,005405783 | transporter activity |
| Δfst4 | 12-day | 2516374 | down | GO:0005215 | 0,005405783 | transporter activity |
| Δfst4 | 12-day | 2520877 | down | GO:0005215 | 0,005405783 | transporter activity |
| Δfst4 | 12-day | 2525305 | down | GO:0005215 | 0,005405783 | transporter activity |
| Δfst4 | 12-day | 2543225 | down | GO:0005215 | 0,005405783 | transporter activity |
| Δfst4 | 12-day | 2550918 | down | GO:0005215 | 0,005405783 | transporter activity |
| Δfst4 | 12-day | 2607025 | down | GO:0005215 | 0,005405783 | transporter activity |
| Δfst4 | 12-day | 2613255 | down | GO:0005215 | 0,005405783 | transporter activity |
| Δfst4 | 12-day | 2616189 | down | GO:0005215 | 0,005405783 | transporter activity |
| Δfst4 | 12-day | 2621148 | down | GO:0005215 | 0,005405783 | transporter activity |
| Δfst4 | 12-day | 2622598 | down | GO:0005215 | 0,005405783 | transporter activity |
| Δfst4 | 12-day | 2623492 | down | GO:0005215 | 0,005405783 | transporter activity |
| Δfst4 | 12-day | 2626453 | down | GO:0005215 | 0,005405783 | transporter activity |
| Δfst4 | 12-day | 2626803 | down | GO:0005215 | 0,005405783 | transporter activity |



|       |        |         |      |            |             |                      |
|-------|--------|---------|------|------------|-------------|----------------------|
| Δfst4 | 12-day | 2627703 | down | GO:0005215 | 0,005405783 | transporter activity |
| Δfst4 | 12-day | 2628751 | down | GO:0005215 | 0,005405783 | transporter activity |
| Δfst4 | 12-day | 2629091 | down | GO:0005215 | 0,005405783 | transporter activity |
| Δfst4 | 12-day | 2633216 | down | GO:0005215 | 0,005405783 | transporter activity |
| Δfst4 | 12-day | 2636597 | down | GO:0005215 | 0,005405783 | transporter activity |
| Δfst4 | 12-day | 2637509 | down | GO:0005215 | 0,005405783 | transporter activity |
| Δfst4 | 12-day | 2642553 | down | GO:0005215 | 0,005405783 | transporter activity |
| Δfst4 | 12-day | 2661224 | down | GO:0005215 | 0,005405783 | transporter activity |
| Δfst4 | 12-day | 2701571 | down | GO:0005215 | 0,005405783 | transporter activity |
| Δfst4 | 12-day | 2712060 | down | GO:0005215 | 0,005405783 | transporter activity |
| Δfst4 | 12-day | 1138917 | down | GO:0005488 | 0,006446617 | binding              |
| Δfst4 | 12-day | 1152293 | down | GO:0005488 | 0,006446617 | binding              |
| Δfst4 | 12-day | 2085050 | down | GO:0005488 | 0,006446617 | binding              |
| Δfst4 | 12-day | 2255031 | down | GO:0005488 | 0,006446617 | binding              |
| Δfst4 | 12-day | 2333133 | down | GO:0005488 | 0,006446617 | binding              |
| Δfst4 | 12-day | 2492878 | down | GO:0005488 | 0,006446617 | binding              |
| Δfst4 | 12-day | 2495855 | down | GO:0005488 | 0,006446617 | binding              |
| Δfst4 | 12-day | 2511020 | down | GO:0005488 | 0,006446617 | binding              |
| Δfst4 | 12-day | 2520877 | down | GO:0005488 | 0,006446617 | binding              |
| Δfst4 | 12-day | 2562034 | down | GO:0005488 | 0,006446617 | binding              |
| Δfst4 | 12-day | 2605752 | down | GO:0005488 | 0,006446617 | binding              |
| Δfst4 | 12-day | 2605787 | down | GO:0005488 | 0,006446617 | binding              |
| Δfst4 | 12-day | 2606988 | down | GO:0005488 | 0,006446617 | binding              |
| Δfst4 | 12-day | 2608048 | down | GO:0005488 | 0,006446617 | binding              |
| Δfst4 | 12-day | 2610587 | down | GO:0005488 | 0,006446617 | binding              |
| Δfst4 | 12-day | 2610599 | down | GO:0005488 | 0,006446617 | binding              |
| Δfst4 | 12-day | 2612591 | down | GO:0005488 | 0,006446617 | binding              |
| Δfst4 | 12-day | 2614759 | down | GO:0005488 | 0,006446617 | binding              |
| Δfst4 | 12-day | 2616880 | down | GO:0005488 | 0,006446617 | binding              |
| Δfst4 | 12-day | 2616916 | down | GO:0005488 | 0,006446617 | binding              |
| Δfst4 | 12-day | 2618904 | down | GO:0005488 | 0,006446617 | binding              |
| Δfst4 | 12-day | 2619248 | down | GO:0005488 | 0,006446617 | binding              |
| Δfst4 | 12-day | 2619714 | down | GO:0005488 | 0,006446617 | binding              |
| Δfst4 | 12-day | 2621873 | down | GO:0005488 | 0,006446617 | binding              |

|       |        |         |      |            |             |                                                     |
|-------|--------|---------|------|------------|-------------|-----------------------------------------------------|
| Δfst4 | 12-day | 2622063 | down | GO:0005488 | 0,006446617 | binding                                             |
| Δfst4 | 12-day | 2623301 | down | GO:0005488 | 0,006446617 | binding                                             |
| Δfst4 | 12-day | 2624675 | down | GO:0005488 | 0,006446617 | binding                                             |
| Δfst4 | 12-day | 2625561 | down | GO:0005488 | 0,006446617 | binding                                             |
| Δfst4 | 12-day | 2625782 | down | GO:0005488 | 0,006446617 | binding                                             |
| Δfst4 | 12-day | 2626510 | down | GO:0005488 | 0,006446617 | binding                                             |
| Δfst4 | 12-day | 2628751 | down | GO:0005488 | 0,006446617 | binding                                             |
| Δfst4 | 12-day | 2629526 | down | GO:0005488 | 0,006446617 | binding                                             |
| Δfst4 | 12-day | 2632611 | down | GO:0005488 | 0,006446617 | binding                                             |
| Δfst4 | 12-day | 2633167 | down | GO:0005488 | 0,006446617 | binding                                             |
| Δfst4 | 12-day | 2633632 | down | GO:0005488 | 0,006446617 | binding                                             |
| Δfst4 | 12-day | 2634450 | down | GO:0005488 | 0,006446617 | binding                                             |
| Δfst4 | 12-day | 2637088 | down | GO:0005488 | 0,006446617 | binding                                             |
| Δfst4 | 12-day | 2637104 | down | GO:0005488 | 0,006446617 | binding                                             |
| Δfst4 | 12-day | 2637668 | down | GO:0005488 | 0,006446617 | binding                                             |
| Δfst4 | 12-day | 2638484 | down | GO:0005488 | 0,006446617 | binding                                             |
| Δfst4 | 12-day | 2641506 | down | GO:0005488 | 0,006446617 | binding                                             |
| Δfst4 | 12-day | 2641520 | down | GO:0005488 | 0,006446617 | binding                                             |
| Δfst4 | 12-day | 2644330 | down | GO:0005488 | 0,006446617 | binding                                             |
| Δfst4 | 12-day | 2661224 | down | GO:0005488 | 0,006446617 | binding                                             |
| Δfst4 | 12-day | 2661491 | down | GO:0005488 | 0,006446617 | binding                                             |
| Δfst4 | 12-day | 2673954 | down | GO:0005488 | 0,006446617 | binding                                             |
| Δfst4 | 12-day | 2705421 | down | GO:0005488 | 0,006446617 | binding                                             |
| Δfst4 | 12-day | 2711060 | down | GO:0005488 | 0,006446617 | binding                                             |
| Δfst4 | 12-day | 2633632 | down | GO:0004316 | 0,015926484 | 3-oxoacyl-[acyl-carrier-protein] reductase activity |
| Δfst4 | 12-day | 2634450 | down | GO:0004316 | 0,015926484 | 3-oxoacyl-[acyl-carrier-protein] reductase activity |
| Δfst4 | 12-day | 2641506 | down | GO:0004316 | 0,015926484 | 3-oxoacyl-[acyl-carrier-protein] reductase activity |
| Δfst4 | 12-day | 2641520 | down | GO:0004316 | 0,015926484 | 3-oxoacyl-[acyl-carrier-protein] reductase activity |
| Δfst4 | 12-day | 2705421 | down | GO:0004316 | 0,015926484 | 3-oxoacyl-[acyl-carrier-protein] reductase activity |
| Δfst4 | 12-day | 1036421 | down | GO:0016021 | 0,030484489 | integral to membrane                                |
| Δfst4 | 12-day | 1091573 | down | GO:0016021 | 0,030484489 | integral to membrane                                |
| Δfst4 | 12-day | 1093619 | down | GO:0016021 | 0,030484489 | integral to membrane                                |
| Δfst4 | 12-day | 1144263 | down | GO:0016021 | 0,030484489 | integral to membrane                                |
| Δfst4 | 12-day | 1154281 | down | GO:0016021 | 0,030484489 | integral to membrane                                |

|       |        |         |      |            |             |                      |
|-------|--------|---------|------|------------|-------------|----------------------|
| Δfst4 | 12-day | 1166919 | down | GO:0016021 | 0,030484489 | integral to membrane |
| Δfst4 | 12-day | 2145491 | down | GO:0016021 | 0,030484489 | integral to membrane |
| Δfst4 | 12-day | 2481653 | down | GO:0016021 | 0,030484489 | integral to membrane |
| Δfst4 | 12-day | 2483267 | down | GO:0016021 | 0,030484489 | integral to membrane |
| Δfst4 | 12-day | 2485970 | down | GO:0016021 | 0,030484489 | integral to membrane |
| Δfst4 | 12-day | 2503108 | down | GO:0016021 | 0,030484489 | integral to membrane |
| Δfst4 | 12-day | 2504863 | down | GO:0016021 | 0,030484489 | integral to membrane |
| Δfst4 | 12-day | 2509716 | down | GO:0016021 | 0,030484489 | integral to membrane |
| Δfst4 | 12-day | 2516374 | down | GO:0016021 | 0,030484489 | integral to membrane |
| Δfst4 | 12-day | 2524870 | down | GO:0016021 | 0,030484489 | integral to membrane |
| Δfst4 | 12-day | 2525305 | down | GO:0016021 | 0,030484489 | integral to membrane |
| Δfst4 | 12-day | 2538948 | down | GO:0016021 | 0,030484489 | integral to membrane |
| Δfst4 | 12-day | 2543225 | down | GO:0016021 | 0,030484489 | integral to membrane |
| Δfst4 | 12-day | 2550918 | down | GO:0016021 | 0,030484489 | integral to membrane |
| Δfst4 | 12-day | 2558791 | down | GO:0016021 | 0,030484489 | integral to membrane |
| Δfst4 | 12-day | 2592432 | down | GO:0016021 | 0,030484489 | integral to membrane |
| Δfst4 | 12-day | 2604174 | down | GO:0016021 | 0,030484489 | integral to membrane |
| Δfst4 | 12-day | 2604984 | down | GO:0016021 | 0,030484489 | integral to membrane |
| Δfst4 | 12-day | 2607025 | down | GO:0016021 | 0,030484489 | integral to membrane |
| Δfst4 | 12-day | 2613255 | down | GO:0016021 | 0,030484489 | integral to membrane |
| Δfst4 | 12-day | 2616189 | down | GO:0016021 | 0,030484489 | integral to membrane |
| Δfst4 | 12-day | 2616602 | down | GO:0016021 | 0,030484489 | integral to membrane |
| Δfst4 | 12-day | 2621148 | down | GO:0016021 | 0,030484489 | integral to membrane |
| Δfst4 | 12-day | 2622598 | down | GO:0016021 | 0,030484489 | integral to membrane |
| Δfst4 | 12-day | 2623492 | down | GO:0016021 | 0,030484489 | integral to membrane |
| Δfst4 | 12-day | 2626453 | down | GO:0016021 | 0,030484489 | integral to membrane |
| Δfst4 | 12-day | 2626803 | down | GO:0016021 | 0,030484489 | integral to membrane |
| Δfst4 | 12-day | 2627703 | down | GO:0016021 | 0,030484489 | integral to membrane |
| Δfst4 | 12-day | 2629091 | down | GO:0016021 | 0,030484489 | integral to membrane |
| Δfst4 | 12-day | 2633216 | down | GO:0016021 | 0,030484489 | integral to membrane |
| Δfst4 | 12-day | 2636597 | down | GO:0016021 | 0,030484489 | integral to membrane |
| Δfst4 | 12-day | 2637509 | down | GO:0016021 | 0,030484489 | integral to membrane |
| Δfst4 | 12-day | 2638261 | down | GO:0016021 | 0,030484489 | integral to membrane |
| Δfst4 | 12-day | 2641709 | down | GO:0016021 | 0,030484489 | integral to membrane |

|       |        |         |      |            |             |                      |
|-------|--------|---------|------|------------|-------------|----------------------|
| Δfst4 | 12-day | 2663372 | down | GO:0016021 | 0,030484489 | integral to membrane |
| Δfst4 | 12-day | 2667661 | down | GO:0016021 | 0,030484489 | integral to membrane |
| Δfst4 | 12-day | 2681288 | down | GO:0016021 | 0,030484489 | integral to membrane |
| Δfst4 | 12-day | 2686473 | down | GO:0016021 | 0,030484489 | integral to membrane |
| Δfst4 | 12-day | 2691538 | down | GO:0016021 | 0,030484489 | integral to membrane |
| Δfst4 | 12-day | 2701571 | down | GO:0016021 | 0,030484489 | integral to membrane |
| Δfst4 | 12-day | 2704867 | down | GO:0016021 | 0,030484489 | integral to membrane |
| Δfst4 | 12-day | 2712060 | down | GO:0016021 | 0,030484489 | integral to membrane |
| Δfst4 | 12-day | 78628   | down | GO:0020037 | 0,041944195 | heme binding         |
| Δfst4 | 12-day | 81631   | down | GO:0020037 | 0,041944195 | heme binding         |
| Δfst4 | 12-day | 1131542 | down | GO:0020037 | 0,041944195 | heme binding         |
| Δfst4 | 12-day | 1139445 | down | GO:0020037 | 0,041944195 | heme binding         |
| Δfst4 | 12-day | 1159597 | down | GO:0020037 | 0,041944195 | heme binding         |
| Δfst4 | 12-day | 1189794 | down | GO:0020037 | 0,041944195 | heme binding         |
| Δfst4 | 12-day | 2327903 | down | GO:0020037 | 0,041944195 | heme binding         |
| Δfst4 | 12-day | 2486680 | down | GO:0020037 | 0,041944195 | heme binding         |
| Δfst4 | 12-day | 2509716 | down | GO:0020037 | 0,041944195 | heme binding         |
| Δfst4 | 12-day | 2512276 | down | GO:0020037 | 0,041944195 | heme binding         |
| Δfst4 | 12-day | 2516208 | down | GO:0020037 | 0,041944195 | heme binding         |
| Δfst4 | 12-day | 2604628 | down | GO:0020037 | 0,041944195 | heme binding         |
| Δfst4 | 12-day | 2604735 | down | GO:0020037 | 0,041944195 | heme binding         |
| Δfst4 | 12-day | 2609840 | down | GO:0020037 | 0,041944195 | heme binding         |
| Δfst4 | 12-day | 2611234 | down | GO:0020037 | 0,041944195 | heme binding         |
| Δfst4 | 12-day | 2616301 | down | GO:0020037 | 0,041944195 | heme binding         |
| Δfst4 | 12-day | 2619674 | down | GO:0020037 | 0,041944195 | heme binding         |
| Δfst4 | 12-day | 2621855 | down | GO:0020037 | 0,041944195 | heme binding         |
| Δfst4 | 12-day | 2623196 | down | GO:0020037 | 0,041944195 | heme binding         |
| Δfst4 | 12-day | 2628312 | down | GO:0020037 | 0,041944195 | heme binding         |
| Δfst4 | 12-day | 2628651 | down | GO:0020037 | 0,041944195 | heme binding         |
| Δfst4 | 12-day | 2635487 | down | GO:0020037 | 0,041944195 | heme binding         |
| Δfst4 | 12-day | 2635869 | down | GO:0020037 | 0,041944195 | heme binding         |
| Δfst4 | 12-day | 2637130 | down | GO:0020037 | 0,041944195 | heme binding         |
| Δfst4 | 12-day | 2638355 | down | GO:0020037 | 0,041944195 | heme binding         |
| Δfst4 | 12-day | 2639762 | down | GO:0020037 | 0,041944195 | heme binding         |

|       |        |         |      |            |             |                                                       |
|-------|--------|---------|------|------------|-------------|-------------------------------------------------------|
| Δfst4 | 12-day | 2668568 | down | GO:0020037 | 0,041944195 | heme binding                                          |
| Δfst4 | 12-day | 2703628 | down | GO:0020037 | 0,041944195 | heme binding                                          |
| Δfst4 | 12-day | 2704129 | down | GO:0020037 | 0,041944195 | heme binding                                          |
| Δfst4 | 12-day | 2753029 | down | GO:0020037 | 0,041944195 | heme binding                                          |
| Δfst4 | 12-day | 237513  | down | GO:0050660 | 0,04567865  | FAD binding                                           |
| Δfst4 | 12-day | 257768  | down | GO:0050660 | 0,04567865  | FAD binding                                           |
| Δfst4 | 12-day | 2343034 | down | GO:0050660 | 0,04567865  | FAD binding                                           |
| Δfst4 | 12-day | 2503108 | down | GO:0050660 | 0,04567865  | FAD binding                                           |
| Δfst4 | 12-day | 2516444 | down | GO:0050660 | 0,04567865  | FAD binding                                           |
| Δfst4 | 12-day | 2607677 | down | GO:0050660 | 0,04567865  | FAD binding                                           |
| Δfst4 | 12-day | 2610771 | down | GO:0050660 | 0,04567865  | FAD binding                                           |
| Δfst4 | 12-day | 2642607 | down | GO:0050660 | 0,04567865  | FAD binding                                           |
| Δfst4 | 12-day | 2663372 | down | GO:0050660 | 0,04567865  | FAD binding                                           |
| Δfst4 | 12-day | 2553610 | down | GO:0016769 | 0,04567865  | transferase activity, transferring nitrogenous groups |
| Δfst4 | 12-day | 2520460 | down | GO:0006520 | 0,04567865  | amino acid metabolic process                          |
| Δfst4 | 12-day | 1144263 | down | GO:0016020 | 0,048918805 | membrane                                              |
| Δfst4 | 12-day | 2088105 | down | GO:0016020 | 0,048918805 | membrane                                              |
| Δfst4 | 12-day | 2162840 | down | GO:0016020 | 0,048918805 | membrane                                              |
| Δfst4 | 12-day | 2501677 | down | GO:0016020 | 0,048918805 | membrane                                              |
| Δfst4 | 12-day | 2503590 | down | GO:0016020 | 0,048918805 | membrane                                              |
| Δfst4 | 12-day | 2516374 | down | GO:0016020 | 0,048918805 | membrane                                              |
| Δfst4 | 12-day | 2525305 | down | GO:0016020 | 0,048918805 | membrane                                              |
| Δfst4 | 12-day | 2541638 | down | GO:0016020 | 0,048918805 | membrane                                              |
| Δfst4 | 12-day | 2550918 | down | GO:0016020 | 0,048918805 | membrane                                              |
| Δfst4 | 12-day | 2600584 | down | GO:0016020 | 0,048918805 | membrane                                              |
| Δfst4 | 12-day | 2610450 | down | GO:0016020 | 0,048918805 | membrane                                              |
| Δfst4 | 12-day | 2613255 | down | GO:0016020 | 0,048918805 | membrane                                              |
| Δfst4 | 12-day | 2616189 | down | GO:0016020 | 0,048918805 | membrane                                              |
| Δfst4 | 12-day | 2616602 | down | GO:0016020 | 0,048918805 | membrane                                              |
| Δfst4 | 12-day | 2617458 | down | GO:0016020 | 0,048918805 | membrane                                              |
| Δfst4 | 12-day | 2618895 | down | GO:0016020 | 0,048918805 | membrane                                              |
| Δfst4 | 12-day | 2618950 | down | GO:0016020 | 0,048918805 | membrane                                              |
| Δfst4 | 12-day | 2622595 | down | GO:0016020 | 0,048918805 | membrane                                              |
| Δfst4 | 12-day | 2622598 | down | GO:0016020 | 0,048918805 | membrane                                              |

|               |        |         |      |            |             |                                       |
|---------------|--------|---------|------|------------|-------------|---------------------------------------|
| $\Delta$ fst4 | 12-day | 2627703 | down | GO:0016020 | 0,048918805 | membrane                              |
| $\Delta$ fst4 | 12-day | 2627998 | down | GO:0016020 | 0,048918805 | membrane                              |
| $\Delta$ fst4 | 12-day | 2629091 | down | GO:0016020 | 0,048918805 | membrane                              |
| $\Delta$ fst4 | 12-day | 2629948 | down | GO:0016020 | 0,048918805 | membrane                              |
| $\Delta$ fst4 | 12-day | 2631182 | down | GO:0016020 | 0,048918805 | membrane                              |
| $\Delta$ fst4 | 12-day | 2631590 | down | GO:0016020 | 0,048918805 | membrane                              |
| $\Delta$ fst4 | 12-day | 2638261 | down | GO:0016020 | 0,048918805 | membrane                              |
| $\Delta$ fst4 | 12-day | 2640999 | down | GO:0016020 | 0,048918805 | membrane                              |
| $\Delta$ fst4 | 12-day | 2642553 | down | GO:0016020 | 0,048918805 | membrane                              |
| $\Delta$ fst4 | 12-day | 2663372 | down | GO:0016020 | 0,048918805 | membrane                              |
| $\Delta$ fst4 | 12-day | 2670534 | down | GO:0016020 | 0,048918805 | membrane                              |
| $\Delta$ fst4 | 12-day | 2675646 | down | GO:0016020 | 0,048918805 | membrane                              |
| $\Delta$ fst4 | 12-day | 2701571 | down | GO:0016020 | 0,048918805 | membrane                              |
| $\Delta$ gat1 | 12-day | 2335105 | up   | GO:0004308 | 0,029344967 | exo-alpha-sialidase activity          |
| $\Delta$ gat1 | 12-day | 2629381 | up   | GO:0004308 | 0,029344967 | exo-alpha-sialidase activity          |
| $\Delta$ gat1 | 12-day | 2619340 | up   | GO:0004194 | 0,048447606 | pepsin A activity                     |
| $\Delta$ gat1 | 12-day | 2520592 | up   | GO:0004339 | 0,048447606 | glucan 1,4-alpha-glucosidase activity |
| $\Delta$ gat1 | 12-day | 2683413 | down | GO:0005840 | 2,35E-19    | ribosome                              |
| $\Delta$ gat1 | 12-day | 2689752 | down | GO:0005840 | 2,35E-19    | ribosome                              |
| $\Delta$ gat1 | 12-day | 2683413 | down | GO:0003735 | 3,26E-19    | structural constituent of ribosome    |
| $\Delta$ gat1 | 12-day | 2689752 | down | GO:0003735 | 3,26E-19    | structural constituent of ribosome    |
| $\Delta$ gat1 | 12-day | 2620969 | down | GO:0006412 | 1,08E-17    | translation                           |
| $\Delta$ gat1 | 12-day | 2683413 | down | GO:0006412 | 1,08E-17    | translation                           |
| $\Delta$ gat1 | 12-day | 2689752 | down | GO:0006412 | 1,08E-17    | translation                           |
| $\Delta$ gat1 | 12-day | 1163017 | down | GO:0005622 | 5,40E-07    | intracellular                         |
| $\Delta$ gat1 | 12-day | 1168422 | down | GO:0005622 | 5,40E-07    | intracellular                         |
| $\Delta$ gat1 | 12-day | 2511560 | down | GO:0005622 | 5,40E-07    | intracellular                         |
| $\Delta$ gat1 | 12-day | 2520583 | down | GO:0005622 | 5,40E-07    | intracellular                         |
| $\Delta$ gat1 | 12-day | 2526629 | down | GO:0005622 | 5,40E-07    | intracellular                         |
| $\Delta$ gat1 | 12-day | 2533198 | down | GO:0005622 | 5,40E-07    | intracellular                         |
| $\Delta$ gat1 | 12-day | 2545061 | down | GO:0005622 | 5,40E-07    | intracellular                         |
| $\Delta$ gat1 | 12-day | 2563894 | down | GO:0005622 | 5,40E-07    | intracellular                         |
| $\Delta$ gat1 | 12-day | 2594118 | down | GO:0005622 | 5,40E-07    | intracellular                         |
| $\Delta$ gat1 | 12-day | 2604883 | down | GO:0005622 | 5,40E-07    | intracellular                         |

|       |        |         |      |            |             |                    |
|-------|--------|---------|------|------------|-------------|--------------------|
| Δgat1 | 12-day | 2606711 | down | GO:0005622 | 5,40E-07    | intracellular      |
| Δgat1 | 12-day | 2624237 | down | GO:0005622 | 5,40E-07    | intracellular      |
| Δgat1 | 12-day | 2629777 | down | GO:0005622 | 5,40E-07    | intracellular      |
| Δgat1 | 12-day | 2667924 | down | GO:0005622 | 5,40E-07    | intracellular      |
| Δgat1 | 12-day | 2668143 | down | GO:0005622 | 5,40E-07    | intracellular      |
| Δgat1 | 12-day | 2683413 | down | GO:0005622 | 5,40E-07    | intracellular      |
| Δgat1 | 12-day | 2686265 | down | GO:0005622 | 5,40E-07    | intracellular      |
| Δgat1 | 12-day | 2687474 | down | GO:0005622 | 5,40E-07    | intracellular      |
| Δgat1 | 12-day | 2689752 | down | GO:0005622 | 5,40E-07    | intracellular      |
| Δgat1 | 12-day | 2690968 | down | GO:0005622 | 5,40E-07    | intracellular      |
| Δgat1 | 12-day | 2743676 | down | GO:0005622 | 5,40E-07    | intracellular      |
| Δgat1 | 12-day | 2075136 | down | GO:0006118 | 0,000245849 | electron transport |
| Δgat1 | 12-day | 2501258 | down | GO:0006118 | 0,000245849 | electron transport |
| Δgat1 | 12-day | 2503108 | down | GO:0006118 | 0,000245849 | electron transport |
| Δgat1 | 12-day | 2516208 | down | GO:0006118 | 0,000245849 | electron transport |
| Δgat1 | 12-day | 2527674 | down | GO:0006118 | 0,000245849 | electron transport |
| Δgat1 | 12-day | 2537529 | down | GO:0006118 | 0,000245849 | electron transport |
| Δgat1 | 12-day | 2594205 | down | GO:0006118 | 0,000245849 | electron transport |
| Δgat1 | 12-day | 2603449 | down | GO:0006118 | 0,000245849 | electron transport |
| Δgat1 | 12-day | 2620407 | down | GO:0006118 | 0,000245849 | electron transport |
| Δgat1 | 12-day | 2620726 | down | GO:0006118 | 0,000245849 | electron transport |
| Δgat1 | 12-day | 2643965 | down | GO:0006118 | 0,000245849 | electron transport |
| Δgat1 | 12-day | 2666440 | down | GO:0006118 | 0,000245849 | electron transport |
| Δgat1 | 12-day | 2695849 | down | GO:0006118 | 0,000245849 | electron transport |
| Δgat1 | 12-day | 2703927 | down | GO:0006118 | 0,000245849 | electron transport |
| Δgat1 | 12-day | 2075136 | down | GO:0005506 | 0,000363471 | iron ion binding   |
| Δgat1 | 12-day | 2501258 | down | GO:0005506 | 0,000363471 | iron ion binding   |
| Δgat1 | 12-day | 2503108 | down | GO:0005506 | 0,000363471 | iron ion binding   |
| Δgat1 | 12-day | 2516208 | down | GO:0005506 | 0,000363471 | iron ion binding   |
| Δgat1 | 12-day | 2537529 | down | GO:0005506 | 0,000363471 | iron ion binding   |
| Δgat1 | 12-day | 2603449 | down | GO:0005506 | 0,000363471 | iron ion binding   |
| Δgat1 | 12-day | 2618220 | down | GO:0005506 | 0,000363471 | iron ion binding   |
| Δgat1 | 12-day | 2620407 | down | GO:0005506 | 0,000363471 | iron ion binding   |
| Δgat1 | 12-day | 2622144 | down | GO:0005506 | 0,000363471 | iron ion binding   |

|       |        |         |      |            |             |                                     |
|-------|--------|---------|------|------------|-------------|-------------------------------------|
| Δgat1 | 12-day | 2643965 | down | GO:0005506 | 0,000363471 | iron ion binding                    |
| Δgat1 | 12-day | 2666440 | down | GO:0005506 | 0,000363471 | iron ion binding                    |
| Δgat1 | 12-day | 2695849 | down | GO:0005506 | 0,000363471 | iron ion binding                    |
| Δgat1 | 12-day | 2075136 | down | GO:0020037 | 0,000363471 | heme binding                        |
| Δgat1 | 12-day | 2501258 | down | GO:0020037 | 0,000363471 | heme binding                        |
| Δgat1 | 12-day | 2516208 | down | GO:0020037 | 0,000363471 | heme binding                        |
| Δgat1 | 12-day | 2537529 | down | GO:0020037 | 0,000363471 | heme binding                        |
| Δgat1 | 12-day | 2620407 | down | GO:0020037 | 0,000363471 | heme binding                        |
| Δgat1 | 12-day | 2666440 | down | GO:0020037 | 0,000363471 | heme binding                        |
| Δgat1 | 12-day | 2695849 | down | GO:0020037 | 0,000363471 | heme binding                        |
| Δgat1 | 12-day | 2501258 | down | GO:0004497 | 0,00037448  | monooxygenase activity              |
| Δgat1 | 12-day | 2516208 | down | GO:0004497 | 0,00037448  | monooxygenase activity              |
| Δgat1 | 12-day | 2537529 | down | GO:0004497 | 0,00037448  | monooxygenase activity              |
| Δgat1 | 12-day | 2620407 | down | GO:0004497 | 0,00037448  | monooxygenase activity              |
| Δgat1 | 12-day | 2666440 | down | GO:0004497 | 0,00037448  | monooxygenase activity              |
| Δgat1 | 12-day | 2695849 | down | GO:0004497 | 0,00037448  | monooxygenase activity              |
| Δgat1 | 12-day | 2703927 | down | GO:0004497 | 0,00037448  | monooxygenase activity              |
| Δgat1 | 12-day | 1214326 | down | GO:0008152 | 0,00037448  | metabolic process                   |
| Δgat1 | 12-day | 2039576 | down | GO:0008152 | 0,00037448  | metabolic process                   |
| Δgat1 | 12-day | 2508441 | down | GO:0008152 | 0,00037448  | metabolic process                   |
| Δgat1 | 12-day | 2512248 | down | GO:0008152 | 0,00037448  | metabolic process                   |
| Δgat1 | 12-day | 2579143 | down | GO:0008152 | 0,00037448  | metabolic process                   |
| Δgat1 | 12-day | 2606988 | down | GO:0008152 | 0,00037448  | metabolic process                   |
| Δgat1 | 12-day | 2610398 | down | GO:0008152 | 0,00037448  | metabolic process                   |
| Δgat1 | 12-day | 2613213 | down | GO:0008152 | 0,00037448  | metabolic process                   |
| Δgat1 | 12-day | 2614800 | down | GO:0008152 | 0,00037448  | metabolic process                   |
| Δgat1 | 12-day | 2623038 | down | GO:0008152 | 0,00037448  | metabolic process                   |
| Δgat1 | 12-day | 2643306 | down | GO:0008152 | 0,00037448  | metabolic process                   |
| Δgat1 | 12-day | 2670535 | down | GO:0008152 | 0,00037448  | metabolic process                   |
| Δgat1 | 12-day | 2681649 | down | GO:0008152 | 0,00037448  | metabolic process                   |
| Δgat1 | 12-day | 2683413 | down | GO:0008152 | 0,00037448  | metabolic process                   |
| Δgat1 | 12-day | 2703927 | down | GO:0008152 | 0,00037448  | metabolic process                   |
| Δgat1 | 12-day | 2705669 | down | GO:0008152 | 0,00037448  | metabolic process                   |
| Δgat1 | 12-day | 2629420 | down | GO:0005199 | 0,00037448  | structural constituent of cell wall |



|       |        |         |      |            |             |                                     |
|-------|--------|---------|------|------------|-------------|-------------------------------------|
| Δgat1 | 12-day | 2703935 | down | GO:0005199 | 0,00037448  | structural constituent of cell wall |
| Δgat1 | 12-day | 2629420 | down | GO:0005618 | 0,000446778 | cell wall                           |
| Δgat1 | 12-day | 2703935 | down | GO:0005618 | 0,000446778 | cell wall                           |
| Δgat1 | 12-day | 1160309 | down | GO:0016491 | 0,000852952 | oxidoreductase activity             |
| Δgat1 | 12-day | 1174574 | down | GO:0016491 | 0,000852952 | oxidoreductase activity             |
| Δgat1 | 12-day | 1214326 | down | GO:0016491 | 0,000852952 | oxidoreductase activity             |
| Δgat1 | 12-day | 2039576 | down | GO:0016491 | 0,000852952 | oxidoreductase activity             |
| Δgat1 | 12-day | 2503108 | down | GO:0016491 | 0,000852952 | oxidoreductase activity             |
| Δgat1 | 12-day | 2527674 | down | GO:0016491 | 0,000852952 | oxidoreductase activity             |
| Δgat1 | 12-day | 2593711 | down | GO:0016491 | 0,000852952 | oxidoreductase activity             |
| Δgat1 | 12-day | 2603449 | down | GO:0016491 | 0,000852952 | oxidoreductase activity             |
| Δgat1 | 12-day | 2606988 | down | GO:0016491 | 0,000852952 | oxidoreductase activity             |
| Δgat1 | 12-day | 2618220 | down | GO:0016491 | 0,000852952 | oxidoreductase activity             |
| Δgat1 | 12-day | 2622144 | down | GO:0016491 | 0,000852952 | oxidoreductase activity             |
| Δgat1 | 12-day | 2643306 | down | GO:0016491 | 0,000852952 | oxidoreductase activity             |
| Δgat1 | 12-day | 2643965 | down | GO:0016491 | 0,000852952 | oxidoreductase activity             |
| Δgat1 | 12-day | 2681649 | down | GO:0016491 | 0,000852952 | oxidoreductase activity             |
| Δgat1 | 12-day | 2685505 | down | GO:0016491 | 0,000852952 | oxidoreductase activity             |
| Δgat1 | 12-day | 2703927 | down | GO:0016491 | 0,000852952 | oxidoreductase activity             |
| Δgat1 | 12-day | 1097910 | down | GO:0003824 | 0,001914723 | catalytic activity                  |
| Δgat1 | 12-day | 1160309 | down | GO:0003824 | 0,001914723 | catalytic activity                  |
| Δgat1 | 12-day | 1354877 | down | GO:0003824 | 0,001914723 | catalytic activity                  |
| Δgat1 | 12-day | 2501021 | down | GO:0003824 | 0,001914723 | catalytic activity                  |
| Δgat1 | 12-day | 2557656 | down | GO:0003824 | 0,001914723 | catalytic activity                  |
| Δgat1 | 12-day | 2568997 | down | GO:0003824 | 0,001914723 | catalytic activity                  |
| Δgat1 | 12-day | 2570936 | down | GO:0003824 | 0,001914723 | catalytic activity                  |
| Δgat1 | 12-day | 2598145 | down | GO:0003824 | 0,001914723 | catalytic activity                  |
| Δgat1 | 12-day | 2606988 | down | GO:0003824 | 0,001914723 | catalytic activity                  |
| Δgat1 | 12-day | 2613213 | down | GO:0003824 | 0,001914723 | catalytic activity                  |
| Δgat1 | 12-day | 2626643 | down | GO:0003824 | 0,001914723 | catalytic activity                  |
| Δgat1 | 12-day | 2628008 | down | GO:0003824 | 0,001914723 | catalytic activity                  |
| Δgat1 | 12-day | 2643306 | down | GO:0003824 | 0,001914723 | catalytic activity                  |
| Δgat1 | 12-day | 2643776 | down | GO:0003824 | 0,001914723 | catalytic activity                  |
| Δgat1 | 12-day | 2645588 | down | GO:0003824 | 0,001914723 | catalytic activity                  |

|       |        |         |      |            |             |                                               |
|-------|--------|---------|------|------------|-------------|-----------------------------------------------|
| Δgat1 | 12-day | 2670535 | down | GO:0003824 | 0,001914723 | catalytic activity                            |
| Δgat1 | 12-day | 2681649 | down | GO:0003824 | 0,001914723 | catalytic activity                            |
| Δgat1 | 12-day | 2683413 | down | GO:0003824 | 0,001914723 | catalytic activity                            |
| Δgat1 | 12-day | 2699217 | down | GO:0003824 | 0,001914723 | catalytic activity                            |
| Δgat1 | 12-day | 1165990 | down | GO:0030170 | 0,003409341 | pyridoxal phosphate binding                   |
| Δgat1 | 12-day | 2579143 | down | GO:0030170 | 0,003409341 | pyridoxal phosphate binding                   |
| Δgat1 | 12-day | 2610398 | down | GO:0030170 | 0,003409341 | pyridoxal phosphate binding                   |
| Δgat1 | 12-day | 2620407 | down | GO:0050381 | 0,004644759 | unspecific monooxygenase activity             |
| Δgat1 | 12-day | 2666440 | down | GO:0050381 | 0,004644759 | unspecific monooxygenase activity             |
| Δgat1 | 12-day | 73246   | down | GO:0005975 | 0,010410984 | carbohydrate metabolic process                |
| Δgat1 | 12-day | 2501021 | down | GO:0005975 | 0,010410984 | carbohydrate metabolic process                |
| Δgat1 | 12-day | 2538080 | down | GO:0005975 | 0,010410984 | carbohydrate metabolic process                |
| Δgat1 | 12-day | 2557656 | down | GO:0005975 | 0,010410984 | carbohydrate metabolic process                |
| Δgat1 | 12-day | 2570936 | down | GO:0005975 | 0,010410984 | carbohydrate metabolic process                |
| Δgat1 | 12-day | 2613657 | down | GO:0005975 | 0,010410984 | carbohydrate metabolic process                |
| Δgat1 | 12-day | 2621806 | down | GO:0005975 | 0,010410984 | carbohydrate metabolic process                |
| Δgat1 | 12-day | 2628008 | down | GO:0005975 | 0,010410984 | carbohydrate metabolic process                |
| Δgat1 | 12-day | 2645945 | down | GO:0005975 | 0,010410984 | carbohydrate metabolic process                |
| Δgat1 | 12-day | 2686544 | down | GO:0005975 | 0,010410984 | carbohydrate metabolic process                |
| Δgat1 | 12-day | 2620969 | down | GO:0006418 | 0,016476396 | tRNA aminoacylation for protein translation   |
| Δgat1 | 12-day | 2620969 | down | GO:0005737 | 0,026640154 | cytoplasm                                     |
| Δgat1 | 12-day | 2645217 | down | GO:0005737 | 0,026640154 | cytoplasm                                     |
| Δgat1 | 12-day | 2607525 | down | GO:0006511 | 0,026640154 | ubiquitin-dependent protein catabolic process |
| Δgat1 | 12-day | 2620969 | down | GO:0004812 | 0,030671141 | aminoacyl-tRNA ligase activity                |
| Δhom1 | 12-day | 1097910 | down | GO:0003824 | 0,000112704 | catalytic activity                            |
| Δhom1 | 12-day | 1160309 | down | GO:0003824 | 0,000112704 | catalytic activity                            |
| Δhom1 | 12-day | 2557656 | down | GO:0003824 | 0,000112704 | catalytic activity                            |
| Δhom1 | 12-day | 2570936 | down | GO:0003824 | 0,000112704 | catalytic activity                            |
| Δhom1 | 12-day | 2598145 | down | GO:0003824 | 0,000112704 | catalytic activity                            |
| Δhom1 | 12-day | 2613213 | down | GO:0003824 | 0,000112704 | catalytic activity                            |
| Δhom1 | 12-day | 2626643 | down | GO:0003824 | 0,000112704 | catalytic activity                            |
| Δhom1 | 12-day | 2631112 | down | GO:0003824 | 0,000112704 | catalytic activity                            |
| Δhom1 | 12-day | 2645588 | down | GO:0003824 | 0,000112704 | catalytic activity                            |
| Δhom1 | 12-day | 2698029 | down | GO:0003824 | 0,000112704 | catalytic activity                            |

|       |        |         |      |            |             |                                    |
|-------|--------|---------|------|------------|-------------|------------------------------------|
| Δhom1 | 12-day | 1160309 | down | GO:0016491 | 0,00026419  | oxidoreductase activity            |
| Δhom1 | 12-day | 1174574 | down | GO:0016491 | 0,00026419  | oxidoreductase activity            |
| Δhom1 | 12-day | 2481224 | down | GO:0016491 | 0,00026419  | oxidoreductase activity            |
| Δhom1 | 12-day | 2618220 | down | GO:0016491 | 0,00026419  | oxidoreductase activity            |
| Δhom1 | 12-day | 2508441 | down | GO:0008152 | 0,002845935 | metabolic process                  |
| Δhom1 | 12-day | 2613213 | down | GO:0008152 | 0,002845935 | metabolic process                  |
| Δhom1 | 12-day | 2631112 | down | GO:0008152 | 0,002845935 | metabolic process                  |
| Δhom1 | 12-day | 2698029 | down | GO:0008152 | 0,002845935 | metabolic process                  |
| Δhom1 | 12-day | 2705669 | down | GO:0008152 | 0,002845935 | metabolic process                  |
| Δhom1 | 12-day | 1091573 | down | GO:0016021 | 0,007675283 | integral to membrane               |
| Δhom1 | 12-day | 1136736 | down | GO:0016021 | 0,007675283 | integral to membrane               |
| Δhom1 | 12-day | 1179721 | down | GO:0016021 | 0,007675283 | integral to membrane               |
| Δhom1 | 12-day | 2491032 | down | GO:0016021 | 0,007675283 | integral to membrane               |
| Δhom1 | 12-day | 2493556 | down | GO:0016021 | 0,007675283 | integral to membrane               |
| Δhom1 | 12-day | 2499364 | down | GO:0016021 | 0,007675283 | integral to membrane               |
| Δhom1 | 12-day | 2563487 | down | GO:0016021 | 0,007675283 | integral to membrane               |
| Δhom1 | 12-day | 2566280 | down | GO:0016021 | 0,007675283 | integral to membrane               |
| Δhom1 | 12-day | 2607662 | down | GO:0016021 | 0,007675283 | integral to membrane               |
| Δhom1 | 12-day | 2625385 | down | GO:0016021 | 0,007675283 | integral to membrane               |
| Δhom1 | 12-day | 2626581 | down | GO:0016021 | 0,007675283 | integral to membrane               |
| Δhom1 | 12-day | 2642967 | down | GO:0016021 | 0,007675283 | integral to membrane               |
| Δhom1 | 12-day | 2695671 | down | GO:0016021 | 0,007675283 | integral to membrane               |
| Δhom1 | 12-day | 1136736 | down | GO:0005215 | 0,020827849 | transporter activity               |
| Δhom1 | 12-day | 1179721 | down | GO:0005215 | 0,020827849 | transporter activity               |
| Δhom1 | 12-day | 2499364 | down | GO:0005215 | 0,020827849 | transporter activity               |
| Δhom1 | 12-day | 2607662 | down | GO:0005215 | 0,020827849 | transporter activity               |
| Δhom1 | 12-day | 2538080 | down | GO:0005975 | 0,031693201 | carbohydrate metabolic process     |
| Δhom1 | 12-day | 2557656 | down | GO:0005975 | 0,031693201 | carbohydrate metabolic process     |
| Δhom1 | 12-day | 2570936 | down | GO:0005975 | 0,031693201 | carbohydrate metabolic process     |
| Δhom1 | 12-day | 2645945 | down | GO:0005975 | 0,031693201 | carbohydrate metabolic process     |
| Δhom2 | 12-day | 2515885 | up   | GO:0003735 | 4,60E-31    | structural constituent of ribosome |
| Δhom2 | 12-day | 2644288 | up   | GO:0003735 | 4,60E-31    | structural constituent of ribosome |
| Δhom2 | 12-day | 2689752 | up   | GO:0003735 | 4,60E-31    | structural constituent of ribosome |
| Δhom2 | 12-day | 2515885 | up   | GO:0005840 | 5,28E-30    | ribosome                           |

|               |        |         |    |            |          |                                |
|---------------|--------|---------|----|------------|----------|--------------------------------|
| $\Delta$ hom2 | 12-day | 2644288 | up | GO:0005840 | 5,28E-30 | ribosome                       |
| $\Delta$ hom2 | 12-day | 2689752 | up | GO:0005840 | 5,28E-30 | ribosome                       |
| $\Delta$ hom2 | 12-day | 1196424 | up | GO:0006412 | 1,40E-21 | translation                    |
| $\Delta$ hom2 | 12-day | 2515885 | up | GO:0006412 | 1,40E-21 | translation                    |
| $\Delta$ hom2 | 12-day | 2620969 | up | GO:0006412 | 1,40E-21 | translation                    |
| $\Delta$ hom2 | 12-day | 2644288 | up | GO:0006412 | 1,40E-21 | translation                    |
| $\Delta$ hom2 | 12-day | 2689752 | up | GO:0006412 | 1,40E-21 | translation                    |
| $\Delta$ hom2 | 12-day | 2730106 | up | GO:0006412 | 1,40E-21 | translation                    |
| $\Delta$ hom2 | 12-day | 66483   | up | GO:0005975 | 1,47E-10 | carbohydrate metabolic process |
| $\Delta$ hom2 | 12-day | 85210   | up | GO:0005975 | 1,47E-10 | carbohydrate metabolic process |
| $\Delta$ hom2 | 12-day | 234329  | up | GO:0005975 | 1,47E-10 | carbohydrate metabolic process |
| $\Delta$ hom2 | 12-day | 2486953 | up | GO:0005975 | 1,47E-10 | carbohydrate metabolic process |
| $\Delta$ hom2 | 12-day | 2493241 | up | GO:0005975 | 1,47E-10 | carbohydrate metabolic process |
| $\Delta$ hom2 | 12-day | 2501021 | up | GO:0005975 | 1,47E-10 | carbohydrate metabolic process |
| $\Delta$ hom2 | 12-day | 2514546 | up | GO:0005975 | 1,47E-10 | carbohydrate metabolic process |
| $\Delta$ hom2 | 12-day | 2570936 | up | GO:0005975 | 1,47E-10 | carbohydrate metabolic process |
| $\Delta$ hom2 | 12-day | 2611511 | up | GO:0005975 | 1,47E-10 | carbohydrate metabolic process |
| $\Delta$ hom2 | 12-day | 2613657 | up | GO:0005975 | 1,47E-10 | carbohydrate metabolic process |
| $\Delta$ hom2 | 12-day | 2621806 | up | GO:0005975 | 1,47E-10 | carbohydrate metabolic process |
| $\Delta$ hom2 | 12-day | 2622563 | up | GO:0005975 | 1,47E-10 | carbohydrate metabolic process |
| $\Delta$ hom2 | 12-day | 2624588 | up | GO:0005975 | 1,47E-10 | carbohydrate metabolic process |
| $\Delta$ hom2 | 12-day | 2624823 | up | GO:0005975 | 1,47E-10 | carbohydrate metabolic process |
| $\Delta$ hom2 | 12-day | 2626756 | up | GO:0005975 | 1,47E-10 | carbohydrate metabolic process |
| $\Delta$ hom2 | 12-day | 2631634 | up | GO:0005975 | 1,47E-10 | carbohydrate metabolic process |
| $\Delta$ hom2 | 12-day | 2633791 | up | GO:0005975 | 1,47E-10 | carbohydrate metabolic process |
| $\Delta$ hom2 | 12-day | 2641020 | up | GO:0005975 | 1,47E-10 | carbohydrate metabolic process |
| $\Delta$ hom2 | 12-day | 2642958 | up | GO:0005975 | 1,47E-10 | carbohydrate metabolic process |
| $\Delta$ hom2 | 12-day | 2643740 | up | GO:0005975 | 1,47E-10 | carbohydrate metabolic process |
| $\Delta$ hom2 | 12-day | 2644666 | up | GO:0005975 | 1,47E-10 | carbohydrate metabolic process |
| $\Delta$ hom2 | 12-day | 2645822 | up | GO:0005975 | 1,47E-10 | carbohydrate metabolic process |
| $\Delta$ hom2 | 12-day | 2670422 | up | GO:0005975 | 1,47E-10 | carbohydrate metabolic process |
| $\Delta$ hom2 | 12-day | 2676633 | up | GO:0005975 | 1,47E-10 | carbohydrate metabolic process |
| $\Delta$ hom2 | 12-day | 2686544 | up | GO:0005975 | 1,47E-10 | carbohydrate metabolic process |
| $\Delta$ hom2 | 12-day | 1083109 | up | GO:0005506 | 5,62E-10 | iron ion binding               |

|       |        |         |    |            |          |                  |
|-------|--------|---------|----|------------|----------|------------------|
| Δhom2 | 12-day | 1120318 | up | GO:0005506 | 5,62E-10 | iron ion binding |
| Δhom2 | 12-day | 1147397 | up | GO:0005506 | 5,62E-10 | iron ion binding |
| Δhom2 | 12-day | 1173144 | up | GO:0005506 | 5,62E-10 | iron ion binding |
| Δhom2 | 12-day | 2364606 | up | GO:0005506 | 5,62E-10 | iron ion binding |
| Δhom2 | 12-day | 2491624 | up | GO:0005506 | 5,62E-10 | iron ion binding |
| Δhom2 | 12-day | 2501258 | up | GO:0005506 | 5,62E-10 | iron ion binding |
| Δhom2 | 12-day | 2514636 | up | GO:0005506 | 5,62E-10 | iron ion binding |
| Δhom2 | 12-day | 2516208 | up | GO:0005506 | 5,62E-10 | iron ion binding |
| Δhom2 | 12-day | 2517480 | up | GO:0005506 | 5,62E-10 | iron ion binding |
| Δhom2 | 12-day | 2537529 | up | GO:0005506 | 5,62E-10 | iron ion binding |
| Δhom2 | 12-day | 2559987 | up | GO:0005506 | 5,62E-10 | iron ion binding |
| Δhom2 | 12-day | 2616590 | up | GO:0005506 | 5,62E-10 | iron ion binding |
| Δhom2 | 12-day | 2625023 | up | GO:0005506 | 5,62E-10 | iron ion binding |
| Δhom2 | 12-day | 2626841 | up | GO:0005506 | 5,62E-10 | iron ion binding |
| Δhom2 | 12-day | 2628300 | up | GO:0005506 | 5,62E-10 | iron ion binding |
| Δhom2 | 12-day | 2629308 | up | GO:0005506 | 5,62E-10 | iron ion binding |
| Δhom2 | 12-day | 2633776 | up | GO:0005506 | 5,62E-10 | iron ion binding |
| Δhom2 | 12-day | 2635949 | up | GO:0005506 | 5,62E-10 | iron ion binding |
| Δhom2 | 12-day | 2637467 | up | GO:0005506 | 5,62E-10 | iron ion binding |
| Δhom2 | 12-day | 2638282 | up | GO:0005506 | 5,62E-10 | iron ion binding |
| Δhom2 | 12-day | 2638350 | up | GO:0005506 | 5,62E-10 | iron ion binding |
| Δhom2 | 12-day | 2638355 | up | GO:0005506 | 5,62E-10 | iron ion binding |
| Δhom2 | 12-day | 2640550 | up | GO:0005506 | 5,62E-10 | iron ion binding |
| Δhom2 | 12-day | 2666440 | up | GO:0005506 | 5,62E-10 | iron ion binding |
| Δhom2 | 12-day | 2695849 | up | GO:0005506 | 5,62E-10 | iron ion binding |
| Δhom2 | 12-day | 2703965 | up | GO:0005506 | 5,62E-10 | iron ion binding |
| Δhom2 | 12-day | 1083109 | up | GO:0020037 | 1,12E-09 | heme binding     |
| Δhom2 | 12-day | 1120318 | up | GO:0020037 | 1,12E-09 | heme binding     |
| Δhom2 | 12-day | 1147397 | up | GO:0020037 | 1,12E-09 | heme binding     |
| Δhom2 | 12-day | 1166490 | up | GO:0020037 | 1,12E-09 | heme binding     |
| Δhom2 | 12-day | 1173144 | up | GO:0020037 | 1,12E-09 | heme binding     |
| Δhom2 | 12-day | 2364606 | up | GO:0020037 | 1,12E-09 | heme binding     |
| Δhom2 | 12-day | 2491624 | up | GO:0020037 | 1,12E-09 | heme binding     |
| Δhom2 | 12-day | 2501258 | up | GO:0020037 | 1,12E-09 | heme binding     |

|       |        |         |    |            |          |                    |
|-------|--------|---------|----|------------|----------|--------------------|
| Δhom2 | 12-day | 2514636 | up | GO:0020037 | 1,12E-09 | heme binding       |
| Δhom2 | 12-day | 2516208 | up | GO:0020037 | 1,12E-09 | heme binding       |
| Δhom2 | 12-day | 2517480 | up | GO:0020037 | 1,12E-09 | heme binding       |
| Δhom2 | 12-day | 2537529 | up | GO:0020037 | 1,12E-09 | heme binding       |
| Δhom2 | 12-day | 2559987 | up | GO:0020037 | 1,12E-09 | heme binding       |
| Δhom2 | 12-day | 2583399 | up | GO:0020037 | 1,12E-09 | heme binding       |
| Δhom2 | 12-day | 2608091 | up | GO:0020037 | 1,12E-09 | heme binding       |
| Δhom2 | 12-day | 2616590 | up | GO:0020037 | 1,12E-09 | heme binding       |
| Δhom2 | 12-day | 2625023 | up | GO:0020037 | 1,12E-09 | heme binding       |
| Δhom2 | 12-day | 2626841 | up | GO:0020037 | 1,12E-09 | heme binding       |
| Δhom2 | 12-day | 2628300 | up | GO:0020037 | 1,12E-09 | heme binding       |
| Δhom2 | 12-day | 2629308 | up | GO:0020037 | 1,12E-09 | heme binding       |
| Δhom2 | 12-day | 2633776 | up | GO:0020037 | 1,12E-09 | heme binding       |
| Δhom2 | 12-day | 2635949 | up | GO:0020037 | 1,12E-09 | heme binding       |
| Δhom2 | 12-day | 2637467 | up | GO:0020037 | 1,12E-09 | heme binding       |
| Δhom2 | 12-day | 2638282 | up | GO:0020037 | 1,12E-09 | heme binding       |
| Δhom2 | 12-day | 2638350 | up | GO:0020037 | 1,12E-09 | heme binding       |
| Δhom2 | 12-day | 2638355 | up | GO:0020037 | 1,12E-09 | heme binding       |
| Δhom2 | 12-day | 2640550 | up | GO:0020037 | 1,12E-09 | heme binding       |
| Δhom2 | 12-day | 2640585 | up | GO:0020037 | 1,12E-09 | heme binding       |
| Δhom2 | 12-day | 2643274 | up | GO:0020037 | 1,12E-09 | heme binding       |
| Δhom2 | 12-day | 2666440 | up | GO:0020037 | 1,12E-09 | heme binding       |
| Δhom2 | 12-day | 2673121 | up | GO:0020037 | 1,12E-09 | heme binding       |
| Δhom2 | 12-day | 2695849 | up | GO:0020037 | 1,12E-09 | heme binding       |
| Δhom2 | 12-day | 2703965 | up | GO:0020037 | 1,12E-09 | heme binding       |
| Δhom2 | 12-day | 1120318 | up | GO:0006118 | 1,74E-08 | electron transport |
| Δhom2 | 12-day | 1147397 | up | GO:0006118 | 1,74E-08 | electron transport |
| Δhom2 | 12-day | 1166490 | up | GO:0006118 | 1,74E-08 | electron transport |
| Δhom2 | 12-day | 1168026 | up | GO:0006118 | 1,74E-08 | electron transport |
| Δhom2 | 12-day | 1173144 | up | GO:0006118 | 1,74E-08 | electron transport |
| Δhom2 | 12-day | 1342670 | up | GO:0006118 | 1,74E-08 | electron transport |
| Δhom2 | 12-day | 2213880 | up | GO:0006118 | 1,74E-08 | electron transport |
| Δhom2 | 12-day | 2364606 | up | GO:0006118 | 1,74E-08 | electron transport |
| Δhom2 | 12-day | 2490194 | up | GO:0006118 | 1,74E-08 | electron transport |

|               |        |         |    |            |          |                    |
|---------------|--------|---------|----|------------|----------|--------------------|
| $\Delta$ hom2 | 12-day | 2491624 | up | GO:0006118 | 1,74E-08 | electron transport |
| $\Delta$ hom2 | 12-day | 2501258 | up | GO:0006118 | 1,74E-08 | electron transport |
| $\Delta$ hom2 | 12-day | 2505277 | up | GO:0006118 | 1,74E-08 | electron transport |
| $\Delta$ hom2 | 12-day | 2507628 | up | GO:0006118 | 1,74E-08 | electron transport |
| $\Delta$ hom2 | 12-day | 2514636 | up | GO:0006118 | 1,74E-08 | electron transport |
| $\Delta$ hom2 | 12-day | 2515251 | up | GO:0006118 | 1,74E-08 | electron transport |
| $\Delta$ hom2 | 12-day | 2516208 | up | GO:0006118 | 1,74E-08 | electron transport |
| $\Delta$ hom2 | 12-day | 2517480 | up | GO:0006118 | 1,74E-08 | electron transport |
| $\Delta$ hom2 | 12-day | 2537529 | up | GO:0006118 | 1,74E-08 | electron transport |
| $\Delta$ hom2 | 12-day | 2559987 | up | GO:0006118 | 1,74E-08 | electron transport |
| $\Delta$ hom2 | 12-day | 2573393 | up | GO:0006118 | 1,74E-08 | electron transport |
| $\Delta$ hom2 | 12-day | 2573396 | up | GO:0006118 | 1,74E-08 | electron transport |
| $\Delta$ hom2 | 12-day | 2576903 | up | GO:0006118 | 1,74E-08 | electron transport |
| $\Delta$ hom2 | 12-day | 2583399 | up | GO:0006118 | 1,74E-08 | electron transport |
| $\Delta$ hom2 | 12-day | 2594205 | up | GO:0006118 | 1,74E-08 | electron transport |
| $\Delta$ hom2 | 12-day | 2605889 | up | GO:0006118 | 1,74E-08 | electron transport |
| $\Delta$ hom2 | 12-day | 2615184 | up | GO:0006118 | 1,74E-08 | electron transport |
| $\Delta$ hom2 | 12-day | 2616557 | up | GO:0006118 | 1,74E-08 | electron transport |
| $\Delta$ hom2 | 12-day | 2616590 | up | GO:0006118 | 1,74E-08 | electron transport |
| $\Delta$ hom2 | 12-day | 2622733 | up | GO:0006118 | 1,74E-08 | electron transport |
| $\Delta$ hom2 | 12-day | 2622740 | up | GO:0006118 | 1,74E-08 | electron transport |
| $\Delta$ hom2 | 12-day | 2625023 | up | GO:0006118 | 1,74E-08 | electron transport |
| $\Delta$ hom2 | 12-day | 2625730 | up | GO:0006118 | 1,74E-08 | electron transport |
| $\Delta$ hom2 | 12-day | 2626841 | up | GO:0006118 | 1,74E-08 | electron transport |
| $\Delta$ hom2 | 12-day | 2628120 | up | GO:0006118 | 1,74E-08 | electron transport |
| $\Delta$ hom2 | 12-day | 2628300 | up | GO:0006118 | 1,74E-08 | electron transport |
| $\Delta$ hom2 | 12-day | 2629308 | up | GO:0006118 | 1,74E-08 | electron transport |
| $\Delta$ hom2 | 12-day | 2633776 | up | GO:0006118 | 1,74E-08 | electron transport |
| $\Delta$ hom2 | 12-day | 2635949 | up | GO:0006118 | 1,74E-08 | electron transport |
| $\Delta$ hom2 | 12-day | 2637467 | up | GO:0006118 | 1,74E-08 | electron transport |
| $\Delta$ hom2 | 12-day | 2638282 | up | GO:0006118 | 1,74E-08 | electron transport |
| $\Delta$ hom2 | 12-day | 2638350 | up | GO:0006118 | 1,74E-08 | electron transport |
| $\Delta$ hom2 | 12-day | 2638355 | up | GO:0006118 | 1,74E-08 | electron transport |
| $\Delta$ hom2 | 12-day | 2638473 | up | GO:0006118 | 1,74E-08 | electron transport |

|       |        |         |    |            |          |                    |
|-------|--------|---------|----|------------|----------|--------------------|
| Δhom2 | 12-day | 2640550 | up | GO:0006118 | 1,74E-08 | electron transport |
| Δhom2 | 12-day | 2643274 | up | GO:0006118 | 1,74E-08 | electron transport |
| Δhom2 | 12-day | 2645843 | up | GO:0006118 | 1,74E-08 | electron transport |
| Δhom2 | 12-day | 2666009 | up | GO:0006118 | 1,74E-08 | electron transport |
| Δhom2 | 12-day | 2666440 | up | GO:0006118 | 1,74E-08 | electron transport |
| Δhom2 | 12-day | 2667289 | up | GO:0006118 | 1,74E-08 | electron transport |
| Δhom2 | 12-day | 2695849 | up | GO:0006118 | 1,74E-08 | electron transport |
| Δhom2 | 12-day | 2703927 | up | GO:0006118 | 1,74E-08 | electron transport |
| Δhom2 | 12-day | 2703965 | up | GO:0006118 | 1,74E-08 | electron transport |
| Δhom2 | 12-day | 2750685 | up | GO:0006118 | 1,74E-08 | electron transport |
| Δhom2 | 12-day | 1194000 | up | GO:0005622 | 1,74E-08 | intracellular      |
| Δhom2 | 12-day | 1293032 | up | GO:0005622 | 1,74E-08 | intracellular      |
| Δhom2 | 12-day | 2509453 | up | GO:0005622 | 1,74E-08 | intracellular      |
| Δhom2 | 12-day | 2511582 | up | GO:0005622 | 1,74E-08 | intracellular      |
| Δhom2 | 12-day | 2513276 | up | GO:0005622 | 1,74E-08 | intracellular      |
| Δhom2 | 12-day | 2515885 | up | GO:0005622 | 1,74E-08 | intracellular      |
| Δhom2 | 12-day | 2520583 | up | GO:0005622 | 1,74E-08 | intracellular      |
| Δhom2 | 12-day | 2563894 | up | GO:0005622 | 1,74E-08 | intracellular      |
| Δhom2 | 12-day | 2570476 | up | GO:0005622 | 1,74E-08 | intracellular      |
| Δhom2 | 12-day | 2580737 | up | GO:0005622 | 1,74E-08 | intracellular      |
| Δhom2 | 12-day | 2594118 | up | GO:0005622 | 1,74E-08 | intracellular      |
| Δhom2 | 12-day | 2601101 | up | GO:0005622 | 1,74E-08 | intracellular      |
| Δhom2 | 12-day | 2604369 | up | GO:0005622 | 1,74E-08 | intracellular      |
| Δhom2 | 12-day | 2608014 | up | GO:0005622 | 1,74E-08 | intracellular      |
| Δhom2 | 12-day | 2609438 | up | GO:0005622 | 1,74E-08 | intracellular      |
| Δhom2 | 12-day | 2615107 | up | GO:0005622 | 1,74E-08 | intracellular      |
| Δhom2 | 12-day | 2621972 | up | GO:0005622 | 1,74E-08 | intracellular      |
| Δhom2 | 12-day | 2624237 | up | GO:0005622 | 1,74E-08 | intracellular      |
| Δhom2 | 12-day | 2630358 | up | GO:0005622 | 1,74E-08 | intracellular      |
| Δhom2 | 12-day | 2635886 | up | GO:0005622 | 1,74E-08 | intracellular      |
| Δhom2 | 12-day | 2643497 | up | GO:0005622 | 1,74E-08 | intracellular      |
| Δhom2 | 12-day | 2644288 | up | GO:0005622 | 1,74E-08 | intracellular      |
| Δhom2 | 12-day | 2666500 | up | GO:0005622 | 1,74E-08 | intracellular      |
| Δhom2 | 12-day | 2667924 | up | GO:0005622 | 1,74E-08 | intracellular      |



|               |        |         |    |            |          |                                                      |
|---------------|--------|---------|----|------------|----------|------------------------------------------------------|
| $\Delta$ hom2 | 12-day | 2689752 | up | GO:0005622 | 1,74E-08 | intracellular                                        |
| $\Delta$ hom2 | 12-day | 2703923 | up | GO:0005622 | 1,74E-08 | intracellular                                        |
| $\Delta$ hom2 | 12-day | 2737267 | up | GO:0005622 | 1,74E-08 | intracellular                                        |
| $\Delta$ hom2 | 12-day | 85210   | up | GO:0004553 | 1,83E-08 | hydrolase activity, hydrolyzing O-glycosyl compounds |
| $\Delta$ hom2 | 12-day | 234329  | up | GO:0004553 | 1,83E-08 | hydrolase activity, hydrolyzing O-glycosyl compounds |
| $\Delta$ hom2 | 12-day | 2486953 | up | GO:0004553 | 1,83E-08 | hydrolase activity, hydrolyzing O-glycosyl compounds |
| $\Delta$ hom2 | 12-day | 2611511 | up | GO:0004553 | 1,83E-08 | hydrolase activity, hydrolyzing O-glycosyl compounds |
| $\Delta$ hom2 | 12-day | 2613657 | up | GO:0004553 | 1,83E-08 | hydrolase activity, hydrolyzing O-glycosyl compounds |
| $\Delta$ hom2 | 12-day | 2621806 | up | GO:0004553 | 1,83E-08 | hydrolase activity, hydrolyzing O-glycosyl compounds |
| $\Delta$ hom2 | 12-day | 2622563 | up | GO:0004553 | 1,83E-08 | hydrolase activity, hydrolyzing O-glycosyl compounds |
| $\Delta$ hom2 | 12-day | 2642958 | up | GO:0004553 | 1,83E-08 | hydrolase activity, hydrolyzing O-glycosyl compounds |
| $\Delta$ hom2 | 12-day | 2643740 | up | GO:0004553 | 1,83E-08 | hydrolase activity, hydrolyzing O-glycosyl compounds |
| $\Delta$ hom2 | 12-day | 2644666 | up | GO:0004553 | 1,83E-08 | hydrolase activity, hydrolyzing O-glycosyl compounds |
| $\Delta$ hom2 | 12-day | 2645822 | up | GO:0004553 | 1,83E-08 | hydrolase activity, hydrolyzing O-glycosyl compounds |
| $\Delta$ hom2 | 12-day | 2670422 | up | GO:0004553 | 1,83E-08 | hydrolase activity, hydrolyzing O-glycosyl compounds |
| $\Delta$ hom2 | 12-day | 2686544 | up | GO:0004553 | 1,83E-08 | hydrolase activity, hydrolyzing O-glycosyl compounds |
| $\Delta$ hom2 | 12-day | 1120318 | up | GO:0004497 | 5,15E-08 | monooxygenase activity                               |
| $\Delta$ hom2 | 12-day | 1147397 | up | GO:0004497 | 5,15E-08 | monooxygenase activity                               |
| $\Delta$ hom2 | 12-day | 1168026 | up | GO:0004497 | 5,15E-08 | monooxygenase activity                               |
| $\Delta$ hom2 | 12-day | 1173144 | up | GO:0004497 | 5,15E-08 | monooxygenase activity                               |
| $\Delta$ hom2 | 12-day | 1342670 | up | GO:0004497 | 5,15E-08 | monooxygenase activity                               |
| $\Delta$ hom2 | 12-day | 2213880 | up | GO:0004497 | 5,15E-08 | monooxygenase activity                               |
| $\Delta$ hom2 | 12-day | 2364606 | up | GO:0004497 | 5,15E-08 | monooxygenase activity                               |
| $\Delta$ hom2 | 12-day | 2490194 | up | GO:0004497 | 5,15E-08 | monooxygenase activity                               |
| $\Delta$ hom2 | 12-day | 2491624 | up | GO:0004497 | 5,15E-08 | monooxygenase activity                               |
| $\Delta$ hom2 | 12-day | 2501258 | up | GO:0004497 | 5,15E-08 | monooxygenase activity                               |
| $\Delta$ hom2 | 12-day | 2514636 | up | GO:0004497 | 5,15E-08 | monooxygenase activity                               |
| $\Delta$ hom2 | 12-day | 2516208 | up | GO:0004497 | 5,15E-08 | monooxygenase activity                               |
| $\Delta$ hom2 | 12-day | 2517480 | up | GO:0004497 | 5,15E-08 | monooxygenase activity                               |
| $\Delta$ hom2 | 12-day | 2537529 | up | GO:0004497 | 5,15E-08 | monooxygenase activity                               |
| $\Delta$ hom2 | 12-day | 2559987 | up | GO:0004497 | 5,15E-08 | monooxygenase activity                               |
| $\Delta$ hom2 | 12-day | 2573393 | up | GO:0004497 | 5,15E-08 | monooxygenase activity                               |
| $\Delta$ hom2 | 12-day | 2573396 | up | GO:0004497 | 5,15E-08 | monooxygenase activity                               |
| $\Delta$ hom2 | 12-day | 2616590 | up | GO:0004497 | 5,15E-08 | monooxygenase activity                               |

|               |        |         |    |            |             |                                   |
|---------------|--------|---------|----|------------|-------------|-----------------------------------|
| $\Delta$ hom2 | 12-day | 2625023 | up | GO:0004497 | 5,15E-08    | monooxygenase activity            |
| $\Delta$ hom2 | 12-day | 2626841 | up | GO:0004497 | 5,15E-08    | monooxygenase activity            |
| $\Delta$ hom2 | 12-day | 2628300 | up | GO:0004497 | 5,15E-08    | monooxygenase activity            |
| $\Delta$ hom2 | 12-day | 2629308 | up | GO:0004497 | 5,15E-08    | monooxygenase activity            |
| $\Delta$ hom2 | 12-day | 2633776 | up | GO:0004497 | 5,15E-08    | monooxygenase activity            |
| $\Delta$ hom2 | 12-day | 2635949 | up | GO:0004497 | 5,15E-08    | monooxygenase activity            |
| $\Delta$ hom2 | 12-day | 2637467 | up | GO:0004497 | 5,15E-08    | monooxygenase activity            |
| $\Delta$ hom2 | 12-day | 2638282 | up | GO:0004497 | 5,15E-08    | monooxygenase activity            |
| $\Delta$ hom2 | 12-day | 2638350 | up | GO:0004497 | 5,15E-08    | monooxygenase activity            |
| $\Delta$ hom2 | 12-day | 2638355 | up | GO:0004497 | 5,15E-08    | monooxygenase activity            |
| $\Delta$ hom2 | 12-day | 2640550 | up | GO:0004497 | 5,15E-08    | monooxygenase activity            |
| $\Delta$ hom2 | 12-day | 2666440 | up | GO:0004497 | 5,15E-08    | monooxygenase activity            |
| $\Delta$ hom2 | 12-day | 2695849 | up | GO:0004497 | 5,15E-08    | monooxygenase activity            |
| $\Delta$ hom2 | 12-day | 2703927 | up | GO:0004497 | 5,15E-08    | monooxygenase activity            |
| $\Delta$ hom2 | 12-day | 2703965 | up | GO:0004497 | 5,15E-08    | monooxygenase activity            |
| $\Delta$ hom2 | 12-day | 2750685 | up | GO:0004497 | 5,15E-08    | monooxygenase activity            |
| $\Delta$ hom2 | 12-day | 1120318 | up | GO:0050381 | 2,55E-07    | unspecific monooxygenase activity |
| $\Delta$ hom2 | 12-day | 2491624 | up | GO:0050381 | 2,55E-07    | unspecific monooxygenase activity |
| $\Delta$ hom2 | 12-day | 2514636 | up | GO:0050381 | 2,55E-07    | unspecific monooxygenase activity |
| $\Delta$ hom2 | 12-day | 2559987 | up | GO:0050381 | 2,55E-07    | unspecific monooxygenase activity |
| $\Delta$ hom2 | 12-day | 2625023 | up | GO:0050381 | 2,55E-07    | unspecific monooxygenase activity |
| $\Delta$ hom2 | 12-day | 2633776 | up | GO:0050381 | 2,55E-07    | unspecific monooxygenase activity |
| $\Delta$ hom2 | 12-day | 2637467 | up | GO:0050381 | 2,55E-07    | unspecific monooxygenase activity |
| $\Delta$ hom2 | 12-day | 2638350 | up | GO:0050381 | 2,55E-07    | unspecific monooxygenase activity |
| $\Delta$ hom2 | 12-day | 2638355 | up | GO:0050381 | 2,55E-07    | unspecific monooxygenase activity |
| $\Delta$ hom2 | 12-day | 2666440 | up | GO:0050381 | 2,55E-07    | unspecific monooxygenase activity |
| $\Delta$ hom2 | 12-day | 2703965 | up | GO:0050381 | 2,55E-07    | unspecific monooxygenase activity |
| $\Delta$ hom2 | 12-day | 1111500 | up | GO:0005215 | 0,002394941 | transporter activity              |
| $\Delta$ hom2 | 12-day | 1136736 | up | GO:0005215 | 0,002394941 | transporter activity              |
| $\Delta$ hom2 | 12-day | 1147635 | up | GO:0005215 | 0,002394941 | transporter activity              |
| $\Delta$ hom2 | 12-day | 1196424 | up | GO:0005215 | 0,002394941 | transporter activity              |
| $\Delta$ hom2 | 12-day | 1234296 | up | GO:0005215 | 0,002394941 | transporter activity              |
| $\Delta$ hom2 | 12-day | 2145491 | up | GO:0005215 | 0,002394941 | transporter activity              |
| $\Delta$ hom2 | 12-day | 2481323 | up | GO:0005215 | 0,002394941 | transporter activity              |

|       |        |         |    |            |             |                      |
|-------|--------|---------|----|------------|-------------|----------------------|
| Δhom2 | 12-day | 2487072 | up | GO:0005215 | 0,002394941 | transporter activity |
| Δhom2 | 12-day | 2488479 | up | GO:0005215 | 0,002394941 | transporter activity |
| Δhom2 | 12-day | 2490525 | up | GO:0005215 | 0,002394941 | transporter activity |
| Δhom2 | 12-day | 2499364 | up | GO:0005215 | 0,002394941 | transporter activity |
| Δhom2 | 12-day | 2499677 | up | GO:0005215 | 0,002394941 | transporter activity |
| Δhom2 | 12-day | 2501978 | up | GO:0005215 | 0,002394941 | transporter activity |
| Δhom2 | 12-day | 2502284 | up | GO:0005215 | 0,002394941 | transporter activity |
| Δhom2 | 12-day | 2508421 | up | GO:0005215 | 0,002394941 | transporter activity |
| Δhom2 | 12-day | 2515031 | up | GO:0005215 | 0,002394941 | transporter activity |
| Δhom2 | 12-day | 2533765 | up | GO:0005215 | 0,002394941 | transporter activity |
| Δhom2 | 12-day | 2546372 | up | GO:0005215 | 0,002394941 | transporter activity |
| Δhom2 | 12-day | 2550918 | up | GO:0005215 | 0,002394941 | transporter activity |
| Δhom2 | 12-day | 2564524 | up | GO:0005215 | 0,002394941 | transporter activity |
| Δhom2 | 12-day | 2611816 | up | GO:0005215 | 0,002394941 | transporter activity |
| Δhom2 | 12-day | 2612313 | up | GO:0005215 | 0,002394941 | transporter activity |
| Δhom2 | 12-day | 2617636 | up | GO:0005215 | 0,002394941 | transporter activity |
| Δhom2 | 12-day | 2618842 | up | GO:0005215 | 0,002394941 | transporter activity |
| Δhom2 | 12-day | 2619010 | up | GO:0005215 | 0,002394941 | transporter activity |
| Δhom2 | 12-day | 2623043 | up | GO:0005215 | 0,002394941 | transporter activity |
| Δhom2 | 12-day | 2623613 | up | GO:0005215 | 0,002394941 | transporter activity |
| Δhom2 | 12-day | 2625268 | up | GO:0005215 | 0,002394941 | transporter activity |
| Δhom2 | 12-day | 2627824 | up | GO:0005215 | 0,002394941 | transporter activity |
| Δhom2 | 12-day | 2627883 | up | GO:0005215 | 0,002394941 | transporter activity |
| Δhom2 | 12-day | 2628098 | up | GO:0005215 | 0,002394941 | transporter activity |
| Δhom2 | 12-day | 2628982 | up | GO:0005215 | 0,002394941 | transporter activity |
| Δhom2 | 12-day | 2630257 | up | GO:0005215 | 0,002394941 | transporter activity |
| Δhom2 | 12-day | 2630802 | up | GO:0005215 | 0,002394941 | transporter activity |
| Δhom2 | 12-day | 2631348 | up | GO:0005215 | 0,002394941 | transporter activity |
| Δhom2 | 12-day | 2632105 | up | GO:0005215 | 0,002394941 | transporter activity |
| Δhom2 | 12-day | 2633206 | up | GO:0005215 | 0,002394941 | transporter activity |
| Δhom2 | 12-day | 2633212 | up | GO:0005215 | 0,002394941 | transporter activity |
| Δhom2 | 12-day | 2633216 | up | GO:0005215 | 0,002394941 | transporter activity |
| Δhom2 | 12-day | 2633596 | up | GO:0005215 | 0,002394941 | transporter activity |
| Δhom2 | 12-day | 2633874 | up | GO:0005215 | 0,002394941 | transporter activity |

|               |        |         |    |            |             |                            |
|---------------|--------|---------|----|------------|-------------|----------------------------|
| $\Delta$ hom2 | 12-day | 2637652 | up | GO:0005215 | 0,002394941 | transporter activity       |
| $\Delta$ hom2 | 12-day | 2641735 | up | GO:0005215 | 0,002394941 | transporter activity       |
| $\Delta$ hom2 | 12-day | 2642894 | up | GO:0005215 | 0,002394941 | transporter activity       |
| $\Delta$ hom2 | 12-day | 2660764 | up | GO:0005215 | 0,002394941 | transporter activity       |
| $\Delta$ hom2 | 12-day | 2663452 | up | GO:0005215 | 0,002394941 | transporter activity       |
| $\Delta$ hom2 | 12-day | 2680674 | up | GO:0005215 | 0,002394941 | transporter activity       |
| $\Delta$ hom2 | 12-day | 2698170 | up | GO:0005215 | 0,002394941 | transporter activity       |
| $\Delta$ hom2 | 12-day | 2698544 | up | GO:0005215 | 0,002394941 | transporter activity       |
| $\Delta$ hom2 | 12-day | 2704067 | up | GO:0005215 | 0,002394941 | transporter activity       |
| $\Delta$ hom2 | 12-day | 2738153 | up | GO:0005215 | 0,002394941 | transporter activity       |
| $\Delta$ hom2 | 12-day | 2749899 | up | GO:0005215 | 0,002394941 | transporter activity       |
| $\Delta$ hom2 | 12-day | 2621224 | up | GO:0006071 | 0,007460932 | glycerol metabolic process |
| $\Delta$ hom2 | 12-day | 48375   | up | GO:0003824 | 0,01579114  | catalytic activity         |
| $\Delta$ hom2 | 12-day | 48473   | up | GO:0003824 | 0,01579114  | catalytic activity         |
| $\Delta$ hom2 | 12-day | 62301   | up | GO:0003824 | 0,01579114  | catalytic activity         |
| $\Delta$ hom2 | 12-day | 75401   | up | GO:0003824 | 0,01579114  | catalytic activity         |
| $\Delta$ hom2 | 12-day | 1097910 | up | GO:0003824 | 0,01579114  | catalytic activity         |
| $\Delta$ hom2 | 12-day | 1110309 | up | GO:0003824 | 0,01579114  | catalytic activity         |
| $\Delta$ hom2 | 12-day | 1131413 | up | GO:0003824 | 0,01579114  | catalytic activity         |
| $\Delta$ hom2 | 12-day | 1143694 | up | GO:0003824 | 0,01579114  | catalytic activity         |
| $\Delta$ hom2 | 12-day | 1147022 | up | GO:0003824 | 0,01579114  | catalytic activity         |
| $\Delta$ hom2 | 12-day | 1150509 | up | GO:0003824 | 0,01579114  | catalytic activity         |
| $\Delta$ hom2 | 12-day | 1158760 | up | GO:0003824 | 0,01579114  | catalytic activity         |
| $\Delta$ hom2 | 12-day | 1160309 | up | GO:0003824 | 0,01579114  | catalytic activity         |
| $\Delta$ hom2 | 12-day | 1212612 | up | GO:0003824 | 0,01579114  | catalytic activity         |
| $\Delta$ hom2 | 12-day | 2006874 | up | GO:0003824 | 0,01579114  | catalytic activity         |
| $\Delta$ hom2 | 12-day | 2052819 | up | GO:0003824 | 0,01579114  | catalytic activity         |
| $\Delta$ hom2 | 12-day | 2190164 | up | GO:0003824 | 0,01579114  | catalytic activity         |
| $\Delta$ hom2 | 12-day | 2485902 | up | GO:0003824 | 0,01579114  | catalytic activity         |
| $\Delta$ hom2 | 12-day | 2491365 | up | GO:0003824 | 0,01579114  | catalytic activity         |
| $\Delta$ hom2 | 12-day | 2499736 | up | GO:0003824 | 0,01579114  | catalytic activity         |
| $\Delta$ hom2 | 12-day | 2501021 | up | GO:0003824 | 0,01579114  | catalytic activity         |
| $\Delta$ hom2 | 12-day | 2502008 | up | GO:0003824 | 0,01579114  | catalytic activity         |
| $\Delta$ hom2 | 12-day | 2506635 | up | GO:0003824 | 0,01579114  | catalytic activity         |

|       |        |         |    |            |            |                    |
|-------|--------|---------|----|------------|------------|--------------------|
| Δhom2 | 12-day | 2509648 | up | GO:0003824 | 0,01579114 | catalytic activity |
| Δhom2 | 12-day | 2513478 | up | GO:0003824 | 0,01579114 | catalytic activity |
| Δhom2 | 12-day | 2514546 | up | GO:0003824 | 0,01579114 | catalytic activity |
| Δhom2 | 12-day | 2515044 | up | GO:0003824 | 0,01579114 | catalytic activity |
| Δhom2 | 12-day | 2516959 | up | GO:0003824 | 0,01579114 | catalytic activity |
| Δhom2 | 12-day | 2525914 | up | GO:0003824 | 0,01579114 | catalytic activity |
| Δhom2 | 12-day | 2536732 | up | GO:0003824 | 0,01579114 | catalytic activity |
| Δhom2 | 12-day | 2540875 | up | GO:0003824 | 0,01579114 | catalytic activity |
| Δhom2 | 12-day | 2543052 | up | GO:0003824 | 0,01579114 | catalytic activity |
| Δhom2 | 12-day | 2556971 | up | GO:0003824 | 0,01579114 | catalytic activity |
| Δhom2 | 12-day | 2568997 | up | GO:0003824 | 0,01579114 | catalytic activity |
| Δhom2 | 12-day | 2570476 | up | GO:0003824 | 0,01579114 | catalytic activity |
| Δhom2 | 12-day | 2570936 | up | GO:0003824 | 0,01579114 | catalytic activity |
| Δhom2 | 12-day | 2570968 | up | GO:0003824 | 0,01579114 | catalytic activity |
| Δhom2 | 12-day | 2580436 | up | GO:0003824 | 0,01579114 | catalytic activity |
| Δhom2 | 12-day | 2592175 | up | GO:0003824 | 0,01579114 | catalytic activity |
| Δhom2 | 12-day | 2594114 | up | GO:0003824 | 0,01579114 | catalytic activity |
| Δhom2 | 12-day | 2603999 | up | GO:0003824 | 0,01579114 | catalytic activity |
| Δhom2 | 12-day | 2605850 | up | GO:0003824 | 0,01579114 | catalytic activity |
| Δhom2 | 12-day | 2606113 | up | GO:0003824 | 0,01579114 | catalytic activity |
| Δhom2 | 12-day | 2606333 | up | GO:0003824 | 0,01579114 | catalytic activity |
| Δhom2 | 12-day | 2606680 | up | GO:0003824 | 0,01579114 | catalytic activity |
| Δhom2 | 12-day | 2606982 | up | GO:0003824 | 0,01579114 | catalytic activity |
| Δhom2 | 12-day | 2607741 | up | GO:0003824 | 0,01579114 | catalytic activity |
| Δhom2 | 12-day | 2607760 | up | GO:0003824 | 0,01579114 | catalytic activity |
| Δhom2 | 12-day | 2608014 | up | GO:0003824 | 0,01579114 | catalytic activity |
| Δhom2 | 12-day | 2609281 | up | GO:0003824 | 0,01579114 | catalytic activity |
| Δhom2 | 12-day | 2609923 | up | GO:0003824 | 0,01579114 | catalytic activity |
| Δhom2 | 12-day | 2610555 | up | GO:0003824 | 0,01579114 | catalytic activity |
| Δhom2 | 12-day | 2611066 | up | GO:0003824 | 0,01579114 | catalytic activity |
| Δhom2 | 12-day | 2612608 | up | GO:0003824 | 0,01579114 | catalytic activity |
| Δhom2 | 12-day | 2613213 | up | GO:0003824 | 0,01579114 | catalytic activity |
| Δhom2 | 12-day | 2613634 | up | GO:0003824 | 0,01579114 | catalytic activity |
| Δhom2 | 12-day | 2614269 | up | GO:0003824 | 0,01579114 | catalytic activity |

|               |        |         |    |            |            |                    |
|---------------|--------|---------|----|------------|------------|--------------------|
| $\Delta$ hom2 | 12-day | 2614455 | up | GO:0003824 | 0,01579114 | catalytic activity |
| $\Delta$ hom2 | 12-day | 2614716 | up | GO:0003824 | 0,01579114 | catalytic activity |
| $\Delta$ hom2 | 12-day | 2616512 | up | GO:0003824 | 0,01579114 | catalytic activity |
| $\Delta$ hom2 | 12-day | 2616873 | up | GO:0003824 | 0,01579114 | catalytic activity |
| $\Delta$ hom2 | 12-day | 2617245 | up | GO:0003824 | 0,01579114 | catalytic activity |
| $\Delta$ hom2 | 12-day | 2617669 | up | GO:0003824 | 0,01579114 | catalytic activity |
| $\Delta$ hom2 | 12-day | 2618038 | up | GO:0003824 | 0,01579114 | catalytic activity |
| $\Delta$ hom2 | 12-day | 2618228 | up | GO:0003824 | 0,01579114 | catalytic activity |
| $\Delta$ hom2 | 12-day | 2619775 | up | GO:0003824 | 0,01579114 | catalytic activity |
| $\Delta$ hom2 | 12-day | 2620112 | up | GO:0003824 | 0,01579114 | catalytic activity |
| $\Delta$ hom2 | 12-day | 2620314 | up | GO:0003824 | 0,01579114 | catalytic activity |
| $\Delta$ hom2 | 12-day | 2620801 | up | GO:0003824 | 0,01579114 | catalytic activity |
| $\Delta$ hom2 | 12-day | 2622563 | up | GO:0003824 | 0,01579114 | catalytic activity |
| $\Delta$ hom2 | 12-day | 2623663 | up | GO:0003824 | 0,01579114 | catalytic activity |
| $\Delta$ hom2 | 12-day | 2623957 | up | GO:0003824 | 0,01579114 | catalytic activity |
| $\Delta$ hom2 | 12-day | 2624672 | up | GO:0003824 | 0,01579114 | catalytic activity |
| $\Delta$ hom2 | 12-day | 2626155 | up | GO:0003824 | 0,01579114 | catalytic activity |
| $\Delta$ hom2 | 12-day | 2626643 | up | GO:0003824 | 0,01579114 | catalytic activity |
| $\Delta$ hom2 | 12-day | 2626749 | up | GO:0003824 | 0,01579114 | catalytic activity |
| $\Delta$ hom2 | 12-day | 2626756 | up | GO:0003824 | 0,01579114 | catalytic activity |
| $\Delta$ hom2 | 12-day | 2627113 | up | GO:0003824 | 0,01579114 | catalytic activity |
| $\Delta$ hom2 | 12-day | 2628120 | up | GO:0003824 | 0,01579114 | catalytic activity |
| $\Delta$ hom2 | 12-day | 2629514 | up | GO:0003824 | 0,01579114 | catalytic activity |
| $\Delta$ hom2 | 12-day | 2630740 | up | GO:0003824 | 0,01579114 | catalytic activity |
| $\Delta$ hom2 | 12-day | 2631112 | up | GO:0003824 | 0,01579114 | catalytic activity |
| $\Delta$ hom2 | 12-day | 2631634 | up | GO:0003824 | 0,01579114 | catalytic activity |
| $\Delta$ hom2 | 12-day | 2632193 | up | GO:0003824 | 0,01579114 | catalytic activity |
| $\Delta$ hom2 | 12-day | 2634217 | up | GO:0003824 | 0,01579114 | catalytic activity |
| $\Delta$ hom2 | 12-day | 2634281 | up | GO:0003824 | 0,01579114 | catalytic activity |
| $\Delta$ hom2 | 12-day | 2636220 | up | GO:0003824 | 0,01579114 | catalytic activity |
| $\Delta$ hom2 | 12-day | 2636221 | up | GO:0003824 | 0,01579114 | catalytic activity |
| $\Delta$ hom2 | 12-day | 2636417 | up | GO:0003824 | 0,01579114 | catalytic activity |
| $\Delta$ hom2 | 12-day | 2636705 | up | GO:0003824 | 0,01579114 | catalytic activity |
| $\Delta$ hom2 | 12-day | 2637838 | up | GO:0003824 | 0,01579114 | catalytic activity |

|       |        |         |    |            |            |                    |
|-------|--------|---------|----|------------|------------|--------------------|
| Δhom2 | 12-day | 2638445 | up | GO:0003824 | 0,01579114 | catalytic activity |
| Δhom2 | 12-day | 2638446 | up | GO:0003824 | 0,01579114 | catalytic activity |
| Δhom2 | 12-day | 2638893 | up | GO:0003824 | 0,01579114 | catalytic activity |
| Δhom2 | 12-day | 2640123 | up | GO:0003824 | 0,01579114 | catalytic activity |
| Δhom2 | 12-day | 2641020 | up | GO:0003824 | 0,01579114 | catalytic activity |
| Δhom2 | 12-day | 2641553 | up | GO:0003824 | 0,01579114 | catalytic activity |
| Δhom2 | 12-day | 2642124 | up | GO:0003824 | 0,01579114 | catalytic activity |
| Δhom2 | 12-day | 2642810 | up | GO:0003824 | 0,01579114 | catalytic activity |
| Δhom2 | 12-day | 2643306 | up | GO:0003824 | 0,01579114 | catalytic activity |
| Δhom2 | 12-day | 2643776 | up | GO:0003824 | 0,01579114 | catalytic activity |
| Δhom2 | 12-day | 2644309 | up | GO:0003824 | 0,01579114 | catalytic activity |
| Δhom2 | 12-day | 2644333 | up | GO:0003824 | 0,01579114 | catalytic activity |
| Δhom2 | 12-day | 2644610 | up | GO:0003824 | 0,01579114 | catalytic activity |
| Δhom2 | 12-day | 2661978 | up | GO:0003824 | 0,01579114 | catalytic activity |
| Δhom2 | 12-day | 2670535 | up | GO:0003824 | 0,01579114 | catalytic activity |
| Δhom2 | 12-day | 2670536 | up | GO:0003824 | 0,01579114 | catalytic activity |
| Δhom2 | 12-day | 2676633 | up | GO:0003824 | 0,01579114 | catalytic activity |
| Δhom2 | 12-day | 2681649 | up | GO:0003824 | 0,01579114 | catalytic activity |
| Δhom2 | 12-day | 2682272 | up | GO:0003824 | 0,01579114 | catalytic activity |
| Δhom2 | 12-day | 2684249 | up | GO:0003824 | 0,01579114 | catalytic activity |
| Δhom2 | 12-day | 2689521 | up | GO:0003824 | 0,01579114 | catalytic activity |
| Δhom2 | 12-day | 2690641 | up | GO:0003824 | 0,01579114 | catalytic activity |
| Δhom2 | 12-day | 2694468 | up | GO:0003824 | 0,01579114 | catalytic activity |
| Δhom2 | 12-day | 2698029 | up | GO:0003824 | 0,01579114 | catalytic activity |
| Δhom2 | 12-day | 2698778 | up | GO:0003824 | 0,01579114 | catalytic activity |
| Δhom2 | 12-day | 2737267 | up | GO:0003824 | 0,01579114 | catalytic activity |
| Δhom2 | 12-day | 2748659 | up | GO:0003824 | 0,01579114 | catalytic activity |
| Δhom2 | 12-day | 2750120 | up | GO:0003824 | 0,01579114 | catalytic activity |
| Δhom2 | 12-day | 2750165 | up | GO:0003824 | 0,01579114 | catalytic activity |
| Δhom2 | 12-day | 75401   | up | GO:0005515 | 0,03955685 | protein binding    |
| Δhom2 | 12-day | 1174869 | up | GO:0005515 | 0,03955685 | protein binding    |
| Δhom2 | 12-day | 1215992 | up | GO:0005515 | 0,03955685 | protein binding    |
| Δhom2 | 12-day | 2335105 | up | GO:0005515 | 0,03955685 | protein binding    |
| Δhom2 | 12-day | 2485674 | up | GO:0005515 | 0,03955685 | protein binding    |

|       |        |         |    |            |             |                                   |
|-------|--------|---------|----|------------|-------------|-----------------------------------|
| Δhom2 | 12-day | 2488527 | up | GO:0005515 | 0,03955685  | protein binding                   |
| Δhom2 | 12-day | 2495727 | up | GO:0005515 | 0,03955685  | protein binding                   |
| Δhom2 | 12-day | 2533371 | up | GO:0005515 | 0,03955685  | protein binding                   |
| Δhom2 | 12-day | 2535716 | up | GO:0005515 | 0,03955685  | protein binding                   |
| Δhom2 | 12-day | 2550939 | up | GO:0005515 | 0,03955685  | protein binding                   |
| Δhom2 | 12-day | 2563016 | up | GO:0005515 | 0,03955685  | protein binding                   |
| Δhom2 | 12-day | 2563200 | up | GO:0005515 | 0,03955685  | protein binding                   |
| Δhom2 | 12-day | 2568997 | up | GO:0005515 | 0,03955685  | protein binding                   |
| Δhom2 | 12-day | 2585708 | up | GO:0005515 | 0,03955685  | protein binding                   |
| Δhom2 | 12-day | 2589194 | up | GO:0005515 | 0,03955685  | protein binding                   |
| Δhom2 | 12-day | 2604369 | up | GO:0005515 | 0,03955685  | protein binding                   |
| Δhom2 | 12-day | 2605152 | up | GO:0005515 | 0,03955685  | protein binding                   |
| Δhom2 | 12-day | 2608117 | up | GO:0005515 | 0,03955685  | protein binding                   |
| Δhom2 | 12-day | 2610180 | up | GO:0005515 | 0,03955685  | protein binding                   |
| Δhom2 | 12-day | 2610321 | up | GO:0005515 | 0,03955685  | protein binding                   |
| Δhom2 | 12-day | 2614036 | up | GO:0005515 | 0,03955685  | protein binding                   |
| Δhom2 | 12-day | 2614667 | up | GO:0005515 | 0,03955685  | protein binding                   |
| Δhom2 | 12-day | 2615956 | up | GO:0005515 | 0,03955685  | protein binding                   |
| Δhom2 | 12-day | 2630911 | up | GO:0005515 | 0,03955685  | protein binding                   |
| Δhom2 | 12-day | 2631130 | up | GO:0005515 | 0,03955685  | protein binding                   |
| Δhom2 | 12-day | 2636606 | up | GO:0005515 | 0,03955685  | protein binding                   |
| Δhom2 | 12-day | 2644666 | up | GO:0005515 | 0,03955685  | protein binding                   |
| Δhom2 | 12-day | 2669239 | up | GO:0005515 | 0,03955685  | protein binding                   |
| Δhom2 | 12-day | 2684588 | up | GO:0005515 | 0,03955685  | protein binding                   |
| Δhom2 | 12-day | 2710797 | up | GO:0005515 | 0,03955685  | protein binding                   |
| Δhom2 | 12-day | 1147635 | up | GO:0005351 | 0,048490429 | sugar:hydrogen symporter activity |
| Δhom2 | 12-day | 2499677 | up | GO:0005351 | 0,048490429 | sugar:hydrogen symporter activity |
| Δhom2 | 12-day | 2515031 | up | GO:0005351 | 0,048490429 | sugar:hydrogen symporter activity |
| Δhom2 | 12-day | 2550918 | up | GO:0005351 | 0,048490429 | sugar:hydrogen symporter activity |
| Δhom2 | 12-day | 2610180 | up | GO:0005351 | 0,048490429 | sugar:hydrogen symporter activity |
| Δhom2 | 12-day | 2619010 | up | GO:0005351 | 0,048490429 | sugar:hydrogen symporter activity |
| Δhom2 | 12-day | 2623043 | up | GO:0005351 | 0,048490429 | sugar:hydrogen symporter activity |
| Δhom2 | 12-day | 2627824 | up | GO:0005351 | 0,048490429 | sugar:hydrogen symporter activity |
| Δhom2 | 12-day | 2627883 | up | GO:0005351 | 0,048490429 | sugar:hydrogen symporter activity |



|               |        |         |    |            |             |                                   |
|---------------|--------|---------|----|------------|-------------|-----------------------------------|
| $\Delta$ hom2 | 12-day | 2704067 | up | GO:0005351 | 0,048490429 | sugar:hydrogen symporter activity |
| $\Delta$ hom2 | 12-day | 2749899 | up | GO:0005351 | 0,048490429 | sugar:hydrogen symporter activity |
| $\Delta$ hom2 | 12-day | 57429   | up | GO:0005524 | 0,048490429 | ATP binding                       |
| $\Delta$ hom2 | 12-day | 1129062 | up | GO:0005524 | 0,048490429 | ATP binding                       |
| $\Delta$ hom2 | 12-day | 1158800 | up | GO:0005524 | 0,048490429 | ATP binding                       |
| $\Delta$ hom2 | 12-day | 1172108 | up | GO:0005524 | 0,048490429 | ATP binding                       |
| $\Delta$ hom2 | 12-day | 1174869 | up | GO:0005524 | 0,048490429 | ATP binding                       |
| $\Delta$ hom2 | 12-day | 1178759 | up | GO:0005524 | 0,048490429 | ATP binding                       |
| $\Delta$ hom2 | 12-day | 1181112 | up | GO:0005524 | 0,048490429 | ATP binding                       |
| $\Delta$ hom2 | 12-day | 1186310 | up | GO:0005524 | 0,048490429 | ATP binding                       |
| $\Delta$ hom2 | 12-day | 1196424 | up | GO:0005524 | 0,048490429 | ATP binding                       |
| $\Delta$ hom2 | 12-day | 2253810 | up | GO:0005524 | 0,048490429 | ATP binding                       |
| $\Delta$ hom2 | 12-day | 2279823 | up | GO:0005524 | 0,048490429 | ATP binding                       |
| $\Delta$ hom2 | 12-day | 2481145 | up | GO:0005524 | 0,048490429 | ATP binding                       |
| $\Delta$ hom2 | 12-day | 2484841 | up | GO:0005524 | 0,048490429 | ATP binding                       |
| $\Delta$ hom2 | 12-day | 2486797 | up | GO:0005524 | 0,048490429 | ATP binding                       |
| $\Delta$ hom2 | 12-day | 2487176 | up | GO:0005524 | 0,048490429 | ATP binding                       |
| $\Delta$ hom2 | 12-day | 2490823 | up | GO:0005524 | 0,048490429 | ATP binding                       |
| $\Delta$ hom2 | 12-day | 2493556 | up | GO:0005524 | 0,048490429 | ATP binding                       |
| $\Delta$ hom2 | 12-day | 2495301 | up | GO:0005524 | 0,048490429 | ATP binding                       |
| $\Delta$ hom2 | 12-day | 2503832 | up | GO:0005524 | 0,048490429 | ATP binding                       |
| $\Delta$ hom2 | 12-day | 2510275 | up | GO:0005524 | 0,048490429 | ATP binding                       |
| $\Delta$ hom2 | 12-day | 2511561 | up | GO:0005524 | 0,048490429 | ATP binding                       |
| $\Delta$ hom2 | 12-day | 2514780 | up | GO:0005524 | 0,048490429 | ATP binding                       |
| $\Delta$ hom2 | 12-day | 2520046 | up | GO:0005524 | 0,048490429 | ATP binding                       |
| $\Delta$ hom2 | 12-day | 2527752 | up | GO:0005524 | 0,048490429 | ATP binding                       |
| $\Delta$ hom2 | 12-day | 2530387 | up | GO:0005524 | 0,048490429 | ATP binding                       |
| $\Delta$ hom2 | 12-day | 2533371 | up | GO:0005524 | 0,048490429 | ATP binding                       |
| $\Delta$ hom2 | 12-day | 2535079 | up | GO:0005524 | 0,048490429 | ATP binding                       |
| $\Delta$ hom2 | 12-day | 2535527 | up | GO:0005524 | 0,048490429 | ATP binding                       |
| $\Delta$ hom2 | 12-day | 2544151 | up | GO:0005524 | 0,048490429 | ATP binding                       |
| $\Delta$ hom2 | 12-day | 2550266 | up | GO:0005524 | 0,048490429 | ATP binding                       |
| $\Delta$ hom2 | 12-day | 2550939 | up | GO:0005524 | 0,048490429 | ATP binding                       |
| $\Delta$ hom2 | 12-day | 2554917 | up | GO:0005524 | 0,048490429 | ATP binding                       |

|       |        |         |    |            |             |             |
|-------|--------|---------|----|------------|-------------|-------------|
| Δhom2 | 12-day | 2563653 | up | GO:0005524 | 0,048490429 | ATP binding |
| Δhom2 | 12-day | 2565471 | up | GO:0005524 | 0,048490429 | ATP binding |
| Δhom2 | 12-day | 2569377 | up | GO:0005524 | 0,048490429 | ATP binding |
| Δhom2 | 12-day | 2585708 | up | GO:0005524 | 0,048490429 | ATP binding |
| Δhom2 | 12-day | 2604369 | up | GO:0005524 | 0,048490429 | ATP binding |
| Δhom2 | 12-day | 2605230 | up | GO:0005524 | 0,048490429 | ATP binding |
| Δhom2 | 12-day | 2606202 | up | GO:0005524 | 0,048490429 | ATP binding |
| Δhom2 | 12-day | 2610180 | up | GO:0005524 | 0,048490429 | ATP binding |
| Δhom2 | 12-day | 2612206 | up | GO:0005524 | 0,048490429 | ATP binding |
| Δhom2 | 12-day | 2612608 | up | GO:0005524 | 0,048490429 | ATP binding |
| Δhom2 | 12-day | 2614625 | up | GO:0005524 | 0,048490429 | ATP binding |
| Δhom2 | 12-day | 2614761 | up | GO:0005524 | 0,048490429 | ATP binding |
| Δhom2 | 12-day | 2620364 | up | GO:0005524 | 0,048490429 | ATP binding |
| Δhom2 | 12-day | 2620969 | up | GO:0005524 | 0,048490429 | ATP binding |
| Δhom2 | 12-day | 2621533 | up | GO:0005524 | 0,048490429 | ATP binding |
| Δhom2 | 12-day | 2621741 | up | GO:0005524 | 0,048490429 | ATP binding |
| Δhom2 | 12-day | 2622087 | up | GO:0005524 | 0,048490429 | ATP binding |
| Δhom2 | 12-day | 2623685 | up | GO:0005524 | 0,048490429 | ATP binding |
| Δhom2 | 12-day | 2629497 | up | GO:0005524 | 0,048490429 | ATP binding |
| Δhom2 | 12-day | 2632313 | up | GO:0005524 | 0,048490429 | ATP binding |
| Δhom2 | 12-day | 2632374 | up | GO:0005524 | 0,048490429 | ATP binding |
| Δhom2 | 12-day | 2632524 | up | GO:0005524 | 0,048490429 | ATP binding |
| Δhom2 | 12-day | 2633620 | up | GO:0005524 | 0,048490429 | ATP binding |
| Δhom2 | 12-day | 2636368 | up | GO:0005524 | 0,048490429 | ATP binding |
| Δhom2 | 12-day | 2638986 | up | GO:0005524 | 0,048490429 | ATP binding |
| Δhom2 | 12-day | 2641678 | up | GO:0005524 | 0,048490429 | ATP binding |
| Δhom2 | 12-day | 2645675 | up | GO:0005524 | 0,048490429 | ATP binding |
| Δhom2 | 12-day | 2661304 | up | GO:0005524 | 0,048490429 | ATP binding |
| Δhom2 | 12-day | 2662880 | up | GO:0005524 | 0,048490429 | ATP binding |
| Δhom2 | 12-day | 2672807 | up | GO:0005524 | 0,048490429 | ATP binding |
| Δhom2 | 12-day | 2675859 | up | GO:0005524 | 0,048490429 | ATP binding |
| Δhom2 | 12-day | 2684163 | up | GO:0005524 | 0,048490429 | ATP binding |
| Δhom2 | 12-day | 2691288 | up | GO:0005524 | 0,048490429 | ATP binding |
| Δhom2 | 12-day | 2693043 | up | GO:0005524 | 0,048490429 | ATP binding |

|               |        |         |      |            |             |             |
|---------------|--------|---------|------|------------|-------------|-------------|
| $\Delta$ hom2 | 12-day | 2693940 | up   | GO:0005524 | 0,048490429 | ATP binding |
| $\Delta$ hom2 | 12-day | 2706463 | up   | GO:0005524 | 0,048490429 | ATP binding |
| $\Delta$ hom2 | 12-day | 2725125 | up   | GO:0005524 | 0,048490429 | ATP binding |
| $\Delta$ hom2 | 12-day | 1078940 | down | GO:0006810 | 6,33E-14    | transport   |
| $\Delta$ hom2 | 12-day | 1144263 | down | GO:0006810 | 6,33E-14    | transport   |
| $\Delta$ hom2 | 12-day | 1153136 | down | GO:0006810 | 6,33E-14    | transport   |
| $\Delta$ hom2 | 12-day | 1188719 | down | GO:0006810 | 6,33E-14    | transport   |
| $\Delta$ hom2 | 12-day | 1267603 | down | GO:0006810 | 6,33E-14    | transport   |
| $\Delta$ hom2 | 12-day | 2122325 | down | GO:0006810 | 6,33E-14    | transport   |
| $\Delta$ hom2 | 12-day | 2162840 | down | GO:0006810 | 6,33E-14    | transport   |
| $\Delta$ hom2 | 12-day | 2481653 | down | GO:0006810 | 6,33E-14    | transport   |
| $\Delta$ hom2 | 12-day | 2488637 | down | GO:0006810 | 6,33E-14    | transport   |
| $\Delta$ hom2 | 12-day | 2492878 | down | GO:0006810 | 6,33E-14    | transport   |
| $\Delta$ hom2 | 12-day | 2494144 | down | GO:0006810 | 6,33E-14    | transport   |
| $\Delta$ hom2 | 12-day | 2494727 | down | GO:0006810 | 6,33E-14    | transport   |
| $\Delta$ hom2 | 12-day | 2504863 | down | GO:0006810 | 6,33E-14    | transport   |
| $\Delta$ hom2 | 12-day | 2509716 | down | GO:0006810 | 6,33E-14    | transport   |
| $\Delta$ hom2 | 12-day | 2516374 | down | GO:0006810 | 6,33E-14    | transport   |
| $\Delta$ hom2 | 12-day | 2520877 | down | GO:0006810 | 6,33E-14    | transport   |
| $\Delta$ hom2 | 12-day | 2525305 | down | GO:0006810 | 6,33E-14    | transport   |
| $\Delta$ hom2 | 12-day | 2607025 | down | GO:0006810 | 6,33E-14    | transport   |
| $\Delta$ hom2 | 12-day | 2607891 | down | GO:0006810 | 6,33E-14    | transport   |
| $\Delta$ hom2 | 12-day | 2612474 | down | GO:0006810 | 6,33E-14    | transport   |
| $\Delta$ hom2 | 12-day | 2613255 | down | GO:0006810 | 6,33E-14    | transport   |
| $\Delta$ hom2 | 12-day | 2616961 | down | GO:0006810 | 6,33E-14    | transport   |
| $\Delta$ hom2 | 12-day | 2619645 | down | GO:0006810 | 6,33E-14    | transport   |
| $\Delta$ hom2 | 12-day | 2620170 | down | GO:0006810 | 6,33E-14    | transport   |
| $\Delta$ hom2 | 12-day | 2620830 | down | GO:0006810 | 6,33E-14    | transport   |
| $\Delta$ hom2 | 12-day | 2622598 | down | GO:0006810 | 6,33E-14    | transport   |
| $\Delta$ hom2 | 12-day | 2622931 | down | GO:0006810 | 6,33E-14    | transport   |
| $\Delta$ hom2 | 12-day | 2623492 | down | GO:0006810 | 6,33E-14    | transport   |
| $\Delta$ hom2 | 12-day | 2626803 | down | GO:0006810 | 6,33E-14    | transport   |
| $\Delta$ hom2 | 12-day | 2627190 | down | GO:0006810 | 6,33E-14    | transport   |
| $\Delta$ hom2 | 12-day | 2627703 | down | GO:0006810 | 6,33E-14    | transport   |

|               |        |         |      |            |          |                      |
|---------------|--------|---------|------|------------|----------|----------------------|
| $\Delta$ hom2 | 12-day | 2628751 | down | GO:0006810 | 6,33E-14 | transport            |
| $\Delta$ hom2 | 12-day | 2629091 | down | GO:0006810 | 6,33E-14 | transport            |
| $\Delta$ hom2 | 12-day | 2629455 | down | GO:0006810 | 6,33E-14 | transport            |
| $\Delta$ hom2 | 12-day | 2636597 | down | GO:0006810 | 6,33E-14 | transport            |
| $\Delta$ hom2 | 12-day | 2637190 | down | GO:0006810 | 6,33E-14 | transport            |
| $\Delta$ hom2 | 12-day | 2637509 | down | GO:0006810 | 6,33E-14 | transport            |
| $\Delta$ hom2 | 12-day | 2645850 | down | GO:0006810 | 6,33E-14 | transport            |
| $\Delta$ hom2 | 12-day | 2660934 | down | GO:0006810 | 6,33E-14 | transport            |
| $\Delta$ hom2 | 12-day | 2662585 | down | GO:0006810 | 6,33E-14 | transport            |
| $\Delta$ hom2 | 12-day | 2675831 | down | GO:0006810 | 6,33E-14 | transport            |
| $\Delta$ hom2 | 12-day | 2681288 | down | GO:0006810 | 6,33E-14 | transport            |
| $\Delta$ hom2 | 12-day | 2701571 | down | GO:0006810 | 6,33E-14 | transport            |
| $\Delta$ hom2 | 12-day | 2712060 | down | GO:0006810 | 6,33E-14 | transport            |
| $\Delta$ hom2 | 12-day | 1144263 | down | GO:0005215 | 1,33E-08 | transporter activity |
| $\Delta$ hom2 | 12-day | 1153136 | down | GO:0005215 | 1,33E-08 | transporter activity |
| $\Delta$ hom2 | 12-day | 1188719 | down | GO:0005215 | 1,33E-08 | transporter activity |
| $\Delta$ hom2 | 12-day | 2122325 | down | GO:0005215 | 1,33E-08 | transporter activity |
| $\Delta$ hom2 | 12-day | 2162840 | down | GO:0005215 | 1,33E-08 | transporter activity |
| $\Delta$ hom2 | 12-day | 2481653 | down | GO:0005215 | 1,33E-08 | transporter activity |
| $\Delta$ hom2 | 12-day | 2488637 | down | GO:0005215 | 1,33E-08 | transporter activity |
| $\Delta$ hom2 | 12-day | 2492878 | down | GO:0005215 | 1,33E-08 | transporter activity |
| $\Delta$ hom2 | 12-day | 2494144 | down | GO:0005215 | 1,33E-08 | transporter activity |
| $\Delta$ hom2 | 12-day | 2504863 | down | GO:0005215 | 1,33E-08 | transporter activity |
| $\Delta$ hom2 | 12-day | 2509716 | down | GO:0005215 | 1,33E-08 | transporter activity |
| $\Delta$ hom2 | 12-day | 2516374 | down | GO:0005215 | 1,33E-08 | transporter activity |
| $\Delta$ hom2 | 12-day | 2520877 | down | GO:0005215 | 1,33E-08 | transporter activity |
| $\Delta$ hom2 | 12-day | 2525305 | down | GO:0005215 | 1,33E-08 | transporter activity |
| $\Delta$ hom2 | 12-day | 2607025 | down | GO:0005215 | 1,33E-08 | transporter activity |
| $\Delta$ hom2 | 12-day | 2607891 | down | GO:0005215 | 1,33E-08 | transporter activity |
| $\Delta$ hom2 | 12-day | 2612474 | down | GO:0005215 | 1,33E-08 | transporter activity |
| $\Delta$ hom2 | 12-day | 2613255 | down | GO:0005215 | 1,33E-08 | transporter activity |
| $\Delta$ hom2 | 12-day | 2616961 | down | GO:0005215 | 1,33E-08 | transporter activity |
| $\Delta$ hom2 | 12-day | 2619645 | down | GO:0005215 | 1,33E-08 | transporter activity |
| $\Delta$ hom2 | 12-day | 2620170 | down | GO:0005215 | 1,33E-08 | transporter activity |

|       |        |         |      |            |          |                      |
|-------|--------|---------|------|------------|----------|----------------------|
| Δhom2 | 12-day | 2620830 | down | GO:0005215 | 1,33E-08 | transporter activity |
| Δhom2 | 12-day | 2622598 | down | GO:0005215 | 1,33E-08 | transporter activity |
| Δhom2 | 12-day | 2622931 | down | GO:0005215 | 1,33E-08 | transporter activity |
| Δhom2 | 12-day | 2623492 | down | GO:0005215 | 1,33E-08 | transporter activity |
| Δhom2 | 12-day | 2626803 | down | GO:0005215 | 1,33E-08 | transporter activity |
| Δhom2 | 12-day | 2627703 | down | GO:0005215 | 1,33E-08 | transporter activity |
| Δhom2 | 12-day | 2628751 | down | GO:0005215 | 1,33E-08 | transporter activity |
| Δhom2 | 12-day | 2629091 | down | GO:0005215 | 1,33E-08 | transporter activity |
| Δhom2 | 12-day | 2629455 | down | GO:0005215 | 1,33E-08 | transporter activity |
| Δhom2 | 12-day | 2636597 | down | GO:0005215 | 1,33E-08 | transporter activity |
| Δhom2 | 12-day | 2637509 | down | GO:0005215 | 1,33E-08 | transporter activity |
| Δhom2 | 12-day | 2660934 | down | GO:0005215 | 1,33E-08 | transporter activity |
| Δhom2 | 12-day | 2701571 | down | GO:0005215 | 1,33E-08 | transporter activity |
| Δhom2 | 12-day | 2712060 | down | GO:0005215 | 1,33E-08 | transporter activity |
| Δhom2 | 12-day | 67604   | down | GO:0016020 | 7,65E-07 | membrane             |
| Δhom2 | 12-day | 1121912 | down | GO:0016020 | 7,65E-07 | membrane             |
| Δhom2 | 12-day | 1144263 | down | GO:0016020 | 7,65E-07 | membrane             |
| Δhom2 | 12-day | 1153136 | down | GO:0016020 | 7,65E-07 | membrane             |
| Δhom2 | 12-day | 1176319 | down | GO:0016020 | 7,65E-07 | membrane             |
| Δhom2 | 12-day | 1267603 | down | GO:0016020 | 7,65E-07 | membrane             |
| Δhom2 | 12-day | 2162840 | down | GO:0016020 | 7,65E-07 | membrane             |
| Δhom2 | 12-day | 2234784 | down | GO:0016020 | 7,65E-07 | membrane             |
| Δhom2 | 12-day | 2376858 | down | GO:0016020 | 7,65E-07 | membrane             |
| Δhom2 | 12-day | 2494727 | down | GO:0016020 | 7,65E-07 | membrane             |
| Δhom2 | 12-day | 2516374 | down | GO:0016020 | 7,65E-07 | membrane             |
| Δhom2 | 12-day | 2525305 | down | GO:0016020 | 7,65E-07 | membrane             |
| Δhom2 | 12-day | 2600584 | down | GO:0016020 | 7,65E-07 | membrane             |
| Δhom2 | 12-day | 2605277 | down | GO:0016020 | 7,65E-07 | membrane             |
| Δhom2 | 12-day | 2607008 | down | GO:0016020 | 7,65E-07 | membrane             |
| Δhom2 | 12-day | 2610450 | down | GO:0016020 | 7,65E-07 | membrane             |
| Δhom2 | 12-day | 2612474 | down | GO:0016020 | 7,65E-07 | membrane             |
| Δhom2 | 12-day | 2612886 | down | GO:0016020 | 7,65E-07 | membrane             |
| Δhom2 | 12-day | 2613255 | down | GO:0016020 | 7,65E-07 | membrane             |
| Δhom2 | 12-day | 2618425 | down | GO:0016020 | 7,65E-07 | membrane             |

|       |        |         |      |            |          |                         |
|-------|--------|---------|------|------------|----------|-------------------------|
| Δhom2 | 12-day | 2618479 | down | GO:0016020 | 7,65E-07 | membrane                |
| Δhom2 | 12-day | 2618895 | down | GO:0016020 | 7,65E-07 | membrane                |
| Δhom2 | 12-day | 2622595 | down | GO:0016020 | 7,65E-07 | membrane                |
| Δhom2 | 12-day | 2622598 | down | GO:0016020 | 7,65E-07 | membrane                |
| Δhom2 | 12-day | 2626051 | down | GO:0016020 | 7,65E-07 | membrane                |
| Δhom2 | 12-day | 2627703 | down | GO:0016020 | 7,65E-07 | membrane                |
| Δhom2 | 12-day | 2629091 | down | GO:0016020 | 7,65E-07 | membrane                |
| Δhom2 | 12-day | 2629744 | down | GO:0016020 | 7,65E-07 | membrane                |
| Δhom2 | 12-day | 2631182 | down | GO:0016020 | 7,65E-07 | membrane                |
| Δhom2 | 12-day | 2631590 | down | GO:0016020 | 7,65E-07 | membrane                |
| Δhom2 | 12-day | 2636160 | down | GO:0016020 | 7,65E-07 | membrane                |
| Δhom2 | 12-day | 2639525 | down | GO:0016020 | 7,65E-07 | membrane                |
| Δhom2 | 12-day | 2639805 | down | GO:0016020 | 7,65E-07 | membrane                |
| Δhom2 | 12-day | 2640999 | down | GO:0016020 | 7,65E-07 | membrane                |
| Δhom2 | 12-day | 2644280 | down | GO:0016020 | 7,65E-07 | membrane                |
| Δhom2 | 12-day | 2645850 | down | GO:0016020 | 7,65E-07 | membrane                |
| Δhom2 | 12-day | 2663372 | down | GO:0016020 | 7,65E-07 | membrane                |
| Δhom2 | 12-day | 2675831 | down | GO:0016020 | 7,65E-07 | membrane                |
| Δhom2 | 12-day | 2686995 | down | GO:0016020 | 7,65E-07 | membrane                |
| Δhom2 | 12-day | 2701571 | down | GO:0016020 | 7,65E-07 | membrane                |
| Δhom2 | 12-day | 237513  | down | GO:0016491 | 2,45E-06 | oxidoreductase activity |
| Δhom2 | 12-day | 1152293 | down | GO:0016491 | 2,45E-06 | oxidoreductase activity |
| Δhom2 | 12-day | 1156481 | down | GO:0016491 | 2,45E-06 | oxidoreductase activity |
| Δhom2 | 12-day | 2255031 | down | GO:0016491 | 2,45E-06 | oxidoreductase activity |
| Δhom2 | 12-day | 2312801 | down | GO:0016491 | 2,45E-06 | oxidoreductase activity |
| Δhom2 | 12-day | 2333133 | down | GO:0016491 | 2,45E-06 | oxidoreductase activity |
| Δhom2 | 12-day | 2376858 | down | GO:0016491 | 2,45E-06 | oxidoreductase activity |
| Δhom2 | 12-day | 2490518 | down | GO:0016491 | 2,45E-06 | oxidoreductase activity |
| Δhom2 | 12-day | 2492848 | down | GO:0016491 | 2,45E-06 | oxidoreductase activity |
| Δhom2 | 12-day | 2497674 | down | GO:0016491 | 2,45E-06 | oxidoreductase activity |
| Δhom2 | 12-day | 2499521 | down | GO:0016491 | 2,45E-06 | oxidoreductase activity |
| Δhom2 | 12-day | 2503471 | down | GO:0016491 | 2,45E-06 | oxidoreductase activity |
| Δhom2 | 12-day | 2507164 | down | GO:0016491 | 2,45E-06 | oxidoreductase activity |
| Δhom2 | 12-day | 2515739 | down | GO:0016491 | 2,45E-06 | oxidoreductase activity |

|       |        |         |      |            |          |                         |
|-------|--------|---------|------|------------|----------|-------------------------|
| Δhom2 | 12-day | 2515964 | down | GO:0016491 | 2,45E-06 | oxidoreductase activity |
| Δhom2 | 12-day | 2518082 | down | GO:0016491 | 2,45E-06 | oxidoreductase activity |
| Δhom2 | 12-day | 2538948 | down | GO:0016491 | 2,45E-06 | oxidoreductase activity |
| Δhom2 | 12-day | 2540746 | down | GO:0016491 | 2,45E-06 | oxidoreductase activity |
| Δhom2 | 12-day | 2543454 | down | GO:0016491 | 2,45E-06 | oxidoreductase activity |
| Δhom2 | 12-day | 2571870 | down | GO:0016491 | 2,45E-06 | oxidoreductase activity |
| Δhom2 | 12-day | 2605574 | down | GO:0016491 | 2,45E-06 | oxidoreductase activity |
| Δhom2 | 12-day | 2605752 | down | GO:0016491 | 2,45E-06 | oxidoreductase activity |
| Δhom2 | 12-day | 2606988 | down | GO:0016491 | 2,45E-06 | oxidoreductase activity |
| Δhom2 | 12-day | 2609840 | down | GO:0016491 | 2,45E-06 | oxidoreductase activity |
| Δhom2 | 12-day | 2609854 | down | GO:0016491 | 2,45E-06 | oxidoreductase activity |
| Δhom2 | 12-day | 2610372 | down | GO:0016491 | 2,45E-06 | oxidoreductase activity |
| Δhom2 | 12-day | 2611538 | down | GO:0016491 | 2,45E-06 | oxidoreductase activity |
| Δhom2 | 12-day | 2615160 | down | GO:0016491 | 2,45E-06 | oxidoreductase activity |
| Δhom2 | 12-day | 2616880 | down | GO:0016491 | 2,45E-06 | oxidoreductase activity |
| Δhom2 | 12-day | 2616916 | down | GO:0016491 | 2,45E-06 | oxidoreductase activity |
| Δhom2 | 12-day | 2618220 | down | GO:0016491 | 2,45E-06 | oxidoreductase activity |
| Δhom2 | 12-day | 2618455 | down | GO:0016491 | 2,45E-06 | oxidoreductase activity |
| Δhom2 | 12-day | 2621873 | down | GO:0016491 | 2,45E-06 | oxidoreductase activity |
| Δhom2 | 12-day | 2623189 | down | GO:0016491 | 2,45E-06 | oxidoreductase activity |
| Δhom2 | 12-day | 2623301 | down | GO:0016491 | 2,45E-06 | oxidoreductase activity |
| Δhom2 | 12-day | 2625667 | down | GO:0016491 | 2,45E-06 | oxidoreductase activity |
| Δhom2 | 12-day | 2625917 | down | GO:0016491 | 2,45E-06 | oxidoreductase activity |
| Δhom2 | 12-day | 2627407 | down | GO:0016491 | 2,45E-06 | oxidoreductase activity |
| Δhom2 | 12-day | 2629507 | down | GO:0016491 | 2,45E-06 | oxidoreductase activity |
| Δhom2 | 12-day | 2630637 | down | GO:0016491 | 2,45E-06 | oxidoreductase activity |
| Δhom2 | 12-day | 2633167 | down | GO:0016491 | 2,45E-06 | oxidoreductase activity |
| Δhom2 | 12-day | 2633266 | down | GO:0016491 | 2,45E-06 | oxidoreductase activity |
| Δhom2 | 12-day | 2633632 | down | GO:0016491 | 2,45E-06 | oxidoreductase activity |
| Δhom2 | 12-day | 2634450 | down | GO:0016491 | 2,45E-06 | oxidoreductase activity |
| Δhom2 | 12-day | 2636160 | down | GO:0016491 | 2,45E-06 | oxidoreductase activity |
| Δhom2 | 12-day | 2637104 | down | GO:0016491 | 2,45E-06 | oxidoreductase activity |
| Δhom2 | 12-day | 2637755 | down | GO:0016491 | 2,45E-06 | oxidoreductase activity |
| Δhom2 | 12-day | 2638484 | down | GO:0016491 | 2,45E-06 | oxidoreductase activity |

|       |        |         |      |            |          |                         |
|-------|--------|---------|------|------------|----------|-------------------------|
| Δhom2 | 12-day | 2639682 | down | GO:0016491 | 2,45E-06 | oxidoreductase activity |
| Δhom2 | 12-day | 2641506 | down | GO:0016491 | 2,45E-06 | oxidoreductase activity |
| Δhom2 | 12-day | 2644330 | down | GO:0016491 | 2,45E-06 | oxidoreductase activity |
| Δhom2 | 12-day | 2644422 | down | GO:0016491 | 2,45E-06 | oxidoreductase activity |
| Δhom2 | 12-day | 2644430 | down | GO:0016491 | 2,45E-06 | oxidoreductase activity |
| Δhom2 | 12-day | 2645118 | down | GO:0016491 | 2,45E-06 | oxidoreductase activity |
| Δhom2 | 12-day | 2646148 | down | GO:0016491 | 2,45E-06 | oxidoreductase activity |
| Δhom2 | 12-day | 2663372 | down | GO:0016491 | 2,45E-06 | oxidoreductase activity |
| Δhom2 | 12-day | 2671376 | down | GO:0016491 | 2,45E-06 | oxidoreductase activity |
| Δhom2 | 12-day | 2685505 | down | GO:0016491 | 2,45E-06 | oxidoreductase activity |
| Δhom2 | 12-day | 2688172 | down | GO:0016491 | 2,45E-06 | oxidoreductase activity |
| Δhom2 | 12-day | 2697968 | down | GO:0016491 | 2,45E-06 | oxidoreductase activity |
| Δhom2 | 12-day | 2705421 | down | GO:0016491 | 2,45E-06 | oxidoreductase activity |
| Δhom2 | 12-day | 73881   | down | GO:0008152 | 2,45E-06 | metabolic process       |
| Δhom2 | 12-day | 1092260 | down | GO:0008152 | 2,45E-06 | metabolic process       |
| Δhom2 | 12-day | 1134402 | down | GO:0008152 | 2,45E-06 | metabolic process       |
| Δhom2 | 12-day | 1152293 | down | GO:0008152 | 2,45E-06 | metabolic process       |
| Δhom2 | 12-day | 1156481 | down | GO:0008152 | 2,45E-06 | metabolic process       |
| Δhom2 | 12-day | 1200798 | down | GO:0008152 | 2,45E-06 | metabolic process       |
| Δhom2 | 12-day | 2194185 | down | GO:0008152 | 2,45E-06 | metabolic process       |
| Δhom2 | 12-day | 2255031 | down | GO:0008152 | 2,45E-06 | metabolic process       |
| Δhom2 | 12-day | 2333133 | down | GO:0008152 | 2,45E-06 | metabolic process       |
| Δhom2 | 12-day | 2373661 | down | GO:0008152 | 2,45E-06 | metabolic process       |
| Δhom2 | 12-day | 2492848 | down | GO:0008152 | 2,45E-06 | metabolic process       |
| Δhom2 | 12-day | 2492878 | down | GO:0008152 | 2,45E-06 | metabolic process       |
| Δhom2 | 12-day | 2495032 | down | GO:0008152 | 2,45E-06 | metabolic process       |
| Δhom2 | 12-day | 2503471 | down | GO:0008152 | 2,45E-06 | metabolic process       |
| Δhom2 | 12-day | 2507164 | down | GO:0008152 | 2,45E-06 | metabolic process       |
| Δhom2 | 12-day | 2511020 | down | GO:0008152 | 2,45E-06 | metabolic process       |
| Δhom2 | 12-day | 2541321 | down | GO:0008152 | 2,45E-06 | metabolic process       |
| Δhom2 | 12-day | 2553610 | down | GO:0008152 | 2,45E-06 | metabolic process       |
| Δhom2 | 12-day | 2558552 | down | GO:0008152 | 2,45E-06 | metabolic process       |
| Δhom2 | 12-day | 2577440 | down | GO:0008152 | 2,45E-06 | metabolic process       |
| Δhom2 | 12-day | 2579143 | down | GO:0008152 | 2,45E-06 | metabolic process       |



|       |        |         |      |            |          |                   |
|-------|--------|---------|------|------------|----------|-------------------|
| Δhom2 | 12-day | 2595361 | down | GO:0008152 | 2,45E-06 | metabolic process |
| Δhom2 | 12-day | 2605752 | down | GO:0008152 | 2,45E-06 | metabolic process |
| Δhom2 | 12-day | 2606988 | down | GO:0008152 | 2,45E-06 | metabolic process |
| Δhom2 | 12-day | 2610372 | down | GO:0008152 | 2,45E-06 | metabolic process |
| Δhom2 | 12-day | 2615598 | down | GO:0008152 | 2,45E-06 | metabolic process |
| Δhom2 | 12-day | 2616880 | down | GO:0008152 | 2,45E-06 | metabolic process |
| Δhom2 | 12-day | 2616916 | down | GO:0008152 | 2,45E-06 | metabolic process |
| Δhom2 | 12-day | 2618455 | down | GO:0008152 | 2,45E-06 | metabolic process |
| Δhom2 | 12-day | 2618904 | down | GO:0008152 | 2,45E-06 | metabolic process |
| Δhom2 | 12-day | 2619714 | down | GO:0008152 | 2,45E-06 | metabolic process |
| Δhom2 | 12-day | 2621873 | down | GO:0008152 | 2,45E-06 | metabolic process |
| Δhom2 | 12-day | 2622287 | down | GO:0008152 | 2,45E-06 | metabolic process |
| Δhom2 | 12-day | 2622365 | down | GO:0008152 | 2,45E-06 | metabolic process |
| Δhom2 | 12-day | 2623301 | down | GO:0008152 | 2,45E-06 | metabolic process |
| Δhom2 | 12-day | 2623956 | down | GO:0008152 | 2,45E-06 | metabolic process |
| Δhom2 | 12-day | 2624525 | down | GO:0008152 | 2,45E-06 | metabolic process |
| Δhom2 | 12-day | 2624675 | down | GO:0008152 | 2,45E-06 | metabolic process |
| Δhom2 | 12-day | 2624698 | down | GO:0008152 | 2,45E-06 | metabolic process |
| Δhom2 | 12-day | 2625667 | down | GO:0008152 | 2,45E-06 | metabolic process |
| Δhom2 | 12-day | 2625706 | down | GO:0008152 | 2,45E-06 | metabolic process |
| Δhom2 | 12-day | 2625782 | down | GO:0008152 | 2,45E-06 | metabolic process |
| Δhom2 | 12-day | 2626510 | down | GO:0008152 | 2,45E-06 | metabolic process |
| Δhom2 | 12-day | 2626867 | down | GO:0008152 | 2,45E-06 | metabolic process |
| Δhom2 | 12-day | 2627172 | down | GO:0008152 | 2,45E-06 | metabolic process |
| Δhom2 | 12-day | 2627449 | down | GO:0008152 | 2,45E-06 | metabolic process |
| Δhom2 | 12-day | 2628730 | down | GO:0008152 | 2,45E-06 | metabolic process |
| Δhom2 | 12-day | 2629646 | down | GO:0008152 | 2,45E-06 | metabolic process |
| Δhom2 | 12-day | 2631237 | down | GO:0008152 | 2,45E-06 | metabolic process |
| Δhom2 | 12-day | 2631275 | down | GO:0008152 | 2,45E-06 | metabolic process |
| Δhom2 | 12-day | 2632206 | down | GO:0008152 | 2,45E-06 | metabolic process |
| Δhom2 | 12-day | 2632253 | down | GO:0008152 | 2,45E-06 | metabolic process |
| Δhom2 | 12-day | 2632611 | down | GO:0008152 | 2,45E-06 | metabolic process |
| Δhom2 | 12-day | 2633167 | down | GO:0008152 | 2,45E-06 | metabolic process |
| Δhom2 | 12-day | 2633266 | down | GO:0008152 | 2,45E-06 | metabolic process |

|       |        |         |      |            |          |                    |
|-------|--------|---------|------|------------|----------|--------------------|
| Δhom2 | 12-day | 2633632 | down | GO:0008152 | 2,45E-06 | metabolic process  |
| Δhom2 | 12-day | 2634450 | down | GO:0008152 | 2,45E-06 | metabolic process  |
| Δhom2 | 12-day | 2636100 | down | GO:0008152 | 2,45E-06 | metabolic process  |
| Δhom2 | 12-day | 2637088 | down | GO:0008152 | 2,45E-06 | metabolic process  |
| Δhom2 | 12-day | 2637104 | down | GO:0008152 | 2,45E-06 | metabolic process  |
| Δhom2 | 12-day | 2637643 | down | GO:0008152 | 2,45E-06 | metabolic process  |
| Δhom2 | 12-day | 2637755 | down | GO:0008152 | 2,45E-06 | metabolic process  |
| Δhom2 | 12-day | 2638484 | down | GO:0008152 | 2,45E-06 | metabolic process  |
| Δhom2 | 12-day | 2638921 | down | GO:0008152 | 2,45E-06 | metabolic process  |
| Δhom2 | 12-day | 2639805 | down | GO:0008152 | 2,45E-06 | metabolic process  |
| Δhom2 | 12-day | 2640472 | down | GO:0008152 | 2,45E-06 | metabolic process  |
| Δhom2 | 12-day | 2640484 | down | GO:0008152 | 2,45E-06 | metabolic process  |
| Δhom2 | 12-day | 2640992 | down | GO:0008152 | 2,45E-06 | metabolic process  |
| Δhom2 | 12-day | 2641506 | down | GO:0008152 | 2,45E-06 | metabolic process  |
| Δhom2 | 12-day | 2643650 | down | GO:0008152 | 2,45E-06 | metabolic process  |
| Δhom2 | 12-day | 2644281 | down | GO:0008152 | 2,45E-06 | metabolic process  |
| Δhom2 | 12-day | 2644330 | down | GO:0008152 | 2,45E-06 | metabolic process  |
| Δhom2 | 12-day | 2644422 | down | GO:0008152 | 2,45E-06 | metabolic process  |
| Δhom2 | 12-day | 2644430 | down | GO:0008152 | 2,45E-06 | metabolic process  |
| Δhom2 | 12-day | 2645207 | down | GO:0008152 | 2,45E-06 | metabolic process  |
| Δhom2 | 12-day | 2645668 | down | GO:0008152 | 2,45E-06 | metabolic process  |
| Δhom2 | 12-day | 2646148 | down | GO:0008152 | 2,45E-06 | metabolic process  |
| Δhom2 | 12-day | 2665516 | down | GO:0008152 | 2,45E-06 | metabolic process  |
| Δhom2 | 12-day | 2673857 | down | GO:0008152 | 2,45E-06 | metabolic process  |
| Δhom2 | 12-day | 2686995 | down | GO:0008152 | 2,45E-06 | metabolic process  |
| Δhom2 | 12-day | 2705421 | down | GO:0008152 | 2,45E-06 | metabolic process  |
| Δhom2 | 12-day | 2711060 | down | GO:0008152 | 2,45E-06 | metabolic process  |
| Δhom2 | 12-day | 2728826 | down | GO:0008152 | 2,45E-06 | metabolic process  |
| Δhom2 | 12-day | 73881   | down | GO:0003824 | 2,45E-06 | catalytic activity |
| Δhom2 | 12-day | 85278   | down | GO:0003824 | 2,45E-06 | catalytic activity |
| Δhom2 | 12-day | 237513  | down | GO:0003824 | 2,45E-06 | catalytic activity |
| Δhom2 | 12-day | 1092260 | down | GO:0003824 | 2,45E-06 | catalytic activity |
| Δhom2 | 12-day | 1134402 | down | GO:0003824 | 2,45E-06 | catalytic activity |
| Δhom2 | 12-day | 1152293 | down | GO:0003824 | 2,45E-06 | catalytic activity |

|               |        |         |      |            |          |                    |
|---------------|--------|---------|------|------------|----------|--------------------|
| $\Delta$ hom2 | 12-day | 1184723 | down | GO:0003824 | 2,45E-06 | catalytic activity |
| $\Delta$ hom2 | 12-day | 1200798 | down | GO:0003824 | 2,45E-06 | catalytic activity |
| $\Delta$ hom2 | 12-day | 2023525 | down | GO:0003824 | 2,45E-06 | catalytic activity |
| $\Delta$ hom2 | 12-day | 2107183 | down | GO:0003824 | 2,45E-06 | catalytic activity |
| $\Delta$ hom2 | 12-day | 2194185 | down | GO:0003824 | 2,45E-06 | catalytic activity |
| $\Delta$ hom2 | 12-day | 2255031 | down | GO:0003824 | 2,45E-06 | catalytic activity |
| $\Delta$ hom2 | 12-day | 2333133 | down | GO:0003824 | 2,45E-06 | catalytic activity |
| $\Delta$ hom2 | 12-day | 2335629 | down | GO:0003824 | 2,45E-06 | catalytic activity |
| $\Delta$ hom2 | 12-day | 2368049 | down | GO:0003824 | 2,45E-06 | catalytic activity |
| $\Delta$ hom2 | 12-day | 2373661 | down | GO:0003824 | 2,45E-06 | catalytic activity |
| $\Delta$ hom2 | 12-day | 2492848 | down | GO:0003824 | 2,45E-06 | catalytic activity |
| $\Delta$ hom2 | 12-day | 2492878 | down | GO:0003824 | 2,45E-06 | catalytic activity |
| $\Delta$ hom2 | 12-day | 2495032 | down | GO:0003824 | 2,45E-06 | catalytic activity |
| $\Delta$ hom2 | 12-day | 2502088 | down | GO:0003824 | 2,45E-06 | catalytic activity |
| $\Delta$ hom2 | 12-day | 2511020 | down | GO:0003824 | 2,45E-06 | catalytic activity |
| $\Delta$ hom2 | 12-day | 2540746 | down | GO:0003824 | 2,45E-06 | catalytic activity |
| $\Delta$ hom2 | 12-day | 2541321 | down | GO:0003824 | 2,45E-06 | catalytic activity |
| $\Delta$ hom2 | 12-day | 2558552 | down | GO:0003824 | 2,45E-06 | catalytic activity |
| $\Delta$ hom2 | 12-day | 2595361 | down | GO:0003824 | 2,45E-06 | catalytic activity |
| $\Delta$ hom2 | 12-day | 2598960 | down | GO:0003824 | 2,45E-06 | catalytic activity |
| $\Delta$ hom2 | 12-day | 2605122 | down | GO:0003824 | 2,45E-06 | catalytic activity |
| $\Delta$ hom2 | 12-day | 2605752 | down | GO:0003824 | 2,45E-06 | catalytic activity |
| $\Delta$ hom2 | 12-day | 2606988 | down | GO:0003824 | 2,45E-06 | catalytic activity |
| $\Delta$ hom2 | 12-day | 2607034 | down | GO:0003824 | 2,45E-06 | catalytic activity |
| $\Delta$ hom2 | 12-day | 2610372 | down | GO:0003824 | 2,45E-06 | catalytic activity |
| $\Delta$ hom2 | 12-day | 2614194 | down | GO:0003824 | 2,45E-06 | catalytic activity |
| $\Delta$ hom2 | 12-day | 2615598 | down | GO:0003824 | 2,45E-06 | catalytic activity |
| $\Delta$ hom2 | 12-day | 2616880 | down | GO:0003824 | 2,45E-06 | catalytic activity |
| $\Delta$ hom2 | 12-day | 2616916 | down | GO:0003824 | 2,45E-06 | catalytic activity |
| $\Delta$ hom2 | 12-day | 2618425 | down | GO:0003824 | 2,45E-06 | catalytic activity |
| $\Delta$ hom2 | 12-day | 2618479 | down | GO:0003824 | 2,45E-06 | catalytic activity |
| $\Delta$ hom2 | 12-day | 2618904 | down | GO:0003824 | 2,45E-06 | catalytic activity |
| $\Delta$ hom2 | 12-day | 2618997 | down | GO:0003824 | 2,45E-06 | catalytic activity |
| $\Delta$ hom2 | 12-day | 2619714 | down | GO:0003824 | 2,45E-06 | catalytic activity |

|               |        |         |      |            |          |                    |
|---------------|--------|---------|------|------------|----------|--------------------|
| $\Delta$ hom2 | 12-day | 2620388 | down | GO:0003824 | 2,45E-06 | catalytic activity |
| $\Delta$ hom2 | 12-day | 2621873 | down | GO:0003824 | 2,45E-06 | catalytic activity |
| $\Delta$ hom2 | 12-day | 2622287 | down | GO:0003824 | 2,45E-06 | catalytic activity |
| $\Delta$ hom2 | 12-day | 2623301 | down | GO:0003824 | 2,45E-06 | catalytic activity |
| $\Delta$ hom2 | 12-day | 2624675 | down | GO:0003824 | 2,45E-06 | catalytic activity |
| $\Delta$ hom2 | 12-day | 2624698 | down | GO:0003824 | 2,45E-06 | catalytic activity |
| $\Delta$ hom2 | 12-day | 2625205 | down | GO:0003824 | 2,45E-06 | catalytic activity |
| $\Delta$ hom2 | 12-day | 2625667 | down | GO:0003824 | 2,45E-06 | catalytic activity |
| $\Delta$ hom2 | 12-day | 2625782 | down | GO:0003824 | 2,45E-06 | catalytic activity |
| $\Delta$ hom2 | 12-day | 2625818 | down | GO:0003824 | 2,45E-06 | catalytic activity |
| $\Delta$ hom2 | 12-day | 2626051 | down | GO:0003824 | 2,45E-06 | catalytic activity |
| $\Delta$ hom2 | 12-day | 2626510 | down | GO:0003824 | 2,45E-06 | catalytic activity |
| $\Delta$ hom2 | 12-day | 2627449 | down | GO:0003824 | 2,45E-06 | catalytic activity |
| $\Delta$ hom2 | 12-day | 2628448 | down | GO:0003824 | 2,45E-06 | catalytic activity |
| $\Delta$ hom2 | 12-day | 2628678 | down | GO:0003824 | 2,45E-06 | catalytic activity |
| $\Delta$ hom2 | 12-day | 2628730 | down | GO:0003824 | 2,45E-06 | catalytic activity |
| $\Delta$ hom2 | 12-day | 2629646 | down | GO:0003824 | 2,45E-06 | catalytic activity |
| $\Delta$ hom2 | 12-day | 2631237 | down | GO:0003824 | 2,45E-06 | catalytic activity |
| $\Delta$ hom2 | 12-day | 2632206 | down | GO:0003824 | 2,45E-06 | catalytic activity |
| $\Delta$ hom2 | 12-day | 2632253 | down | GO:0003824 | 2,45E-06 | catalytic activity |
| $\Delta$ hom2 | 12-day | 2632611 | down | GO:0003824 | 2,45E-06 | catalytic activity |
| $\Delta$ hom2 | 12-day | 2633144 | down | GO:0003824 | 2,45E-06 | catalytic activity |
| $\Delta$ hom2 | 12-day | 2633167 | down | GO:0003824 | 2,45E-06 | catalytic activity |
| $\Delta$ hom2 | 12-day | 2633266 | down | GO:0003824 | 2,45E-06 | catalytic activity |
| $\Delta$ hom2 | 12-day | 2633632 | down | GO:0003824 | 2,45E-06 | catalytic activity |
| $\Delta$ hom2 | 12-day | 2634450 | down | GO:0003824 | 2,45E-06 | catalytic activity |
| $\Delta$ hom2 | 12-day | 2634918 | down | GO:0003824 | 2,45E-06 | catalytic activity |
| $\Delta$ hom2 | 12-day | 2635216 | down | GO:0003824 | 2,45E-06 | catalytic activity |
| $\Delta$ hom2 | 12-day | 2637088 | down | GO:0003824 | 2,45E-06 | catalytic activity |
| $\Delta$ hom2 | 12-day | 2637104 | down | GO:0003824 | 2,45E-06 | catalytic activity |
| $\Delta$ hom2 | 12-day | 2637783 | down | GO:0003824 | 2,45E-06 | catalytic activity |
| $\Delta$ hom2 | 12-day | 2638484 | down | GO:0003824 | 2,45E-06 | catalytic activity |
| $\Delta$ hom2 | 12-day | 2638783 | down | GO:0003824 | 2,45E-06 | catalytic activity |
| $\Delta$ hom2 | 12-day | 2640484 | down | GO:0003824 | 2,45E-06 | catalytic activity |

|       |        |         |      |            |          |                      |
|-------|--------|---------|------|------------|----------|----------------------|
| Δhom2 | 12-day | 2640992 | down | GO:0003824 | 2,45E-06 | catalytic activity   |
| Δhom2 | 12-day | 2641022 | down | GO:0003824 | 2,45E-06 | catalytic activity   |
| Δhom2 | 12-day | 2641506 | down | GO:0003824 | 2,45E-06 | catalytic activity   |
| Δhom2 | 12-day | 2643650 | down | GO:0003824 | 2,45E-06 | catalytic activity   |
| Δhom2 | 12-day | 2643902 | down | GO:0003824 | 2,45E-06 | catalytic activity   |
| Δhom2 | 12-day | 2644281 | down | GO:0003824 | 2,45E-06 | catalytic activity   |
| Δhom2 | 12-day | 2644330 | down | GO:0003824 | 2,45E-06 | catalytic activity   |
| Δhom2 | 12-day | 2645207 | down | GO:0003824 | 2,45E-06 | catalytic activity   |
| Δhom2 | 12-day | 2645668 | down | GO:0003824 | 2,45E-06 | catalytic activity   |
| Δhom2 | 12-day | 2673857 | down | GO:0003824 | 2,45E-06 | catalytic activity   |
| Δhom2 | 12-day | 2686995 | down | GO:0003824 | 2,45E-06 | catalytic activity   |
| Δhom2 | 12-day | 2688172 | down | GO:0003824 | 2,45E-06 | catalytic activity   |
| Δhom2 | 12-day | 2699217 | down | GO:0003824 | 2,45E-06 | catalytic activity   |
| Δhom2 | 12-day | 2705421 | down | GO:0003824 | 2,45E-06 | catalytic activity   |
| Δhom2 | 12-day | 2711060 | down | GO:0003824 | 2,45E-06 | catalytic activity   |
| Δhom2 | 12-day | 1036421 | down | GO:0016021 | 2,45E-06 | integral to membrane |
| Δhom2 | 12-day | 1144263 | down | GO:0016021 | 2,45E-06 | integral to membrane |
| Δhom2 | 12-day | 1153136 | down | GO:0016021 | 2,45E-06 | integral to membrane |
| Δhom2 | 12-day | 1188719 | down | GO:0016021 | 2,45E-06 | integral to membrane |
| Δhom2 | 12-day | 2122325 | down | GO:0016021 | 2,45E-06 | integral to membrane |
| Δhom2 | 12-day | 2481653 | down | GO:0016021 | 2,45E-06 | integral to membrane |
| Δhom2 | 12-day | 2488637 | down | GO:0016021 | 2,45E-06 | integral to membrane |
| Δhom2 | 12-day | 2494144 | down | GO:0016021 | 2,45E-06 | integral to membrane |
| Δhom2 | 12-day | 2504863 | down | GO:0016021 | 2,45E-06 | integral to membrane |
| Δhom2 | 12-day | 2509716 | down | GO:0016021 | 2,45E-06 | integral to membrane |
| Δhom2 | 12-day | 2516374 | down | GO:0016021 | 2,45E-06 | integral to membrane |
| Δhom2 | 12-day | 2524870 | down | GO:0016021 | 2,45E-06 | integral to membrane |
| Δhom2 | 12-day | 2525305 | down | GO:0016021 | 2,45E-06 | integral to membrane |
| Δhom2 | 12-day | 2538948 | down | GO:0016021 | 2,45E-06 | integral to membrane |
| Δhom2 | 12-day | 2602395 | down | GO:0016021 | 2,45E-06 | integral to membrane |
| Δhom2 | 12-day | 2604984 | down | GO:0016021 | 2,45E-06 | integral to membrane |
| Δhom2 | 12-day | 2607025 | down | GO:0016021 | 2,45E-06 | integral to membrane |
| Δhom2 | 12-day | 2607891 | down | GO:0016021 | 2,45E-06 | integral to membrane |
| Δhom2 | 12-day | 2612474 | down | GO:0016021 | 2,45E-06 | integral to membrane |

|       |        |         |      |            |          |                                               |
|-------|--------|---------|------|------------|----------|-----------------------------------------------|
| Δhom2 | 12-day | 2613255 | down | GO:0016021 | 2,45E-06 | integral to membrane                          |
| Δhom2 | 12-day | 2616961 | down | GO:0016021 | 2,45E-06 | integral to membrane                          |
| Δhom2 | 12-day | 2619090 | down | GO:0016021 | 2,45E-06 | integral to membrane                          |
| Δhom2 | 12-day | 2619645 | down | GO:0016021 | 2,45E-06 | integral to membrane                          |
| Δhom2 | 12-day | 2620170 | down | GO:0016021 | 2,45E-06 | integral to membrane                          |
| Δhom2 | 12-day | 2620830 | down | GO:0016021 | 2,45E-06 | integral to membrane                          |
| Δhom2 | 12-day | 2622598 | down | GO:0016021 | 2,45E-06 | integral to membrane                          |
| Δhom2 | 12-day | 2622931 | down | GO:0016021 | 2,45E-06 | integral to membrane                          |
| Δhom2 | 12-day | 2623492 | down | GO:0016021 | 2,45E-06 | integral to membrane                          |
| Δhom2 | 12-day | 2626803 | down | GO:0016021 | 2,45E-06 | integral to membrane                          |
| Δhom2 | 12-day | 2627190 | down | GO:0016021 | 2,45E-06 | integral to membrane                          |
| Δhom2 | 12-day | 2627703 | down | GO:0016021 | 2,45E-06 | integral to membrane                          |
| Δhom2 | 12-day | 2629091 | down | GO:0016021 | 2,45E-06 | integral to membrane                          |
| Δhom2 | 12-day | 2629455 | down | GO:0016021 | 2,45E-06 | integral to membrane                          |
| Δhom2 | 12-day | 2636597 | down | GO:0016021 | 2,45E-06 | integral to membrane                          |
| Δhom2 | 12-day | 2637190 | down | GO:0016021 | 2,45E-06 | integral to membrane                          |
| Δhom2 | 12-day | 2637509 | down | GO:0016021 | 2,45E-06 | integral to membrane                          |
| Δhom2 | 12-day | 2641709 | down | GO:0016021 | 2,45E-06 | integral to membrane                          |
| Δhom2 | 12-day | 2645659 | down | GO:0016021 | 2,45E-06 | integral to membrane                          |
| Δhom2 | 12-day | 2660934 | down | GO:0016021 | 2,45E-06 | integral to membrane                          |
| Δhom2 | 12-day | 2663372 | down | GO:0016021 | 2,45E-06 | integral to membrane                          |
| Δhom2 | 12-day | 2681288 | down | GO:0016021 | 2,45E-06 | integral to membrane                          |
| Δhom2 | 12-day | 2686473 | down | GO:0016021 | 2,45E-06 | integral to membrane                          |
| Δhom2 | 12-day | 2701571 | down | GO:0016021 | 2,45E-06 | integral to membrane                          |
| Δhom2 | 12-day | 2704867 | down | GO:0016021 | 2,45E-06 | integral to membrane                          |
| Δhom2 | 12-day | 2712060 | down | GO:0016021 | 2,45E-06 | integral to membrane                          |
| Δhom2 | 12-day | 2675831 | down | GO:0006865 | 9,53E-06 | amino acid transport                          |
| Δhom2 | 12-day | 2675831 | down | GO:0015171 | 9,53E-06 | amino acid transmembrane transporter activity |
| Δhom2 | 12-day | 78628   | down | GO:0004497 | 4,29E-05 | monooxygenase activity                        |
| Δhom2 | 12-day | 81631   | down | GO:0004497 | 4,29E-05 | monooxygenase activity                        |
| Δhom2 | 12-day | 1131542 | down | GO:0004497 | 4,29E-05 | monooxygenase activity                        |
| Δhom2 | 12-day | 1189794 | down | GO:0004497 | 4,29E-05 | monooxygenase activity                        |
| Δhom2 | 12-day | 1193647 | down | GO:0004497 | 4,29E-05 | monooxygenase activity                        |
| Δhom2 | 12-day | 2327903 | down | GO:0004497 | 4,29E-05 | monooxygenase activity                        |

|       |        |         |      |            |             |                        |
|-------|--------|---------|------|------------|-------------|------------------------|
| Δhom2 | 12-day | 2484868 | down | GO:0004497 | 4,29E-05    | monooxygenase activity |
| Δhom2 | 12-day | 2486680 | down | GO:0004497 | 4,29E-05    | monooxygenase activity |
| Δhom2 | 12-day | 2503471 | down | GO:0004497 | 4,29E-05    | monooxygenase activity |
| Δhom2 | 12-day | 2510618 | down | GO:0004497 | 4,29E-05    | monooxygenase activity |
| Δhom2 | 12-day | 2512276 | down | GO:0004497 | 4,29E-05    | monooxygenase activity |
| Δhom2 | 12-day | 2583618 | down | GO:0004497 | 4,29E-05    | monooxygenase activity |
| Δhom2 | 12-day | 2604096 | down | GO:0004497 | 4,29E-05    | monooxygenase activity |
| Δhom2 | 12-day | 2604231 | down | GO:0004497 | 4,29E-05    | monooxygenase activity |
| Δhom2 | 12-day | 2604735 | down | GO:0004497 | 4,29E-05    | monooxygenase activity |
| Δhom2 | 12-day | 2611234 | down | GO:0004497 | 4,29E-05    | monooxygenase activity |
| Δhom2 | 12-day | 2618455 | down | GO:0004497 | 4,29E-05    | monooxygenase activity |
| Δhom2 | 12-day | 2619674 | down | GO:0004497 | 4,29E-05    | monooxygenase activity |
| Δhom2 | 12-day | 2623115 | down | GO:0004497 | 4,29E-05    | monooxygenase activity |
| Δhom2 | 12-day | 2623122 | down | GO:0004497 | 4,29E-05    | monooxygenase activity |
| Δhom2 | 12-day | 2623196 | down | GO:0004497 | 4,29E-05    | monooxygenase activity |
| Δhom2 | 12-day | 2628312 | down | GO:0004497 | 4,29E-05    | monooxygenase activity |
| Δhom2 | 12-day | 2628645 | down | GO:0004497 | 4,29E-05    | monooxygenase activity |
| Δhom2 | 12-day | 2628651 | down | GO:0004497 | 4,29E-05    | monooxygenase activity |
| Δhom2 | 12-day | 2632925 | down | GO:0004497 | 4,29E-05    | monooxygenase activity |
| Δhom2 | 12-day | 2634283 | down | GO:0004497 | 4,29E-05    | monooxygenase activity |
| Δhom2 | 12-day | 2635487 | down | GO:0004497 | 4,29E-05    | monooxygenase activity |
| Δhom2 | 12-day | 2635869 | down | GO:0004497 | 4,29E-05    | monooxygenase activity |
| Δhom2 | 12-day | 2636544 | down | GO:0004497 | 4,29E-05    | monooxygenase activity |
| Δhom2 | 12-day | 2644422 | down | GO:0004497 | 4,29E-05    | monooxygenase activity |
| Δhom2 | 12-day | 2644430 | down | GO:0004497 | 4,29E-05    | monooxygenase activity |
| Δhom2 | 12-day | 2668568 | down | GO:0004497 | 4,29E-05    | monooxygenase activity |
| Δhom2 | 12-day | 2690522 | down | GO:0004497 | 4,29E-05    | monooxygenase activity |
| Δhom2 | 12-day | 2703628 | down | GO:0004497 | 4,29E-05    | monooxygenase activity |
| Δhom2 | 12-day | 2703966 | down | GO:0004497 | 4,29E-05    | monooxygenase activity |
| Δhom2 | 12-day | 2735179 | down | GO:0004497 | 4,29E-05    | monooxygenase activity |
| Δhom2 | 12-day | 78628   | down | GO:0006118 | 0,000820624 | electron transport     |
| Δhom2 | 12-day | 81631   | down | GO:0006118 | 0,000820624 | electron transport     |
| Δhom2 | 12-day | 1084300 | down | GO:0006118 | 0,000820624 | electron transport     |
| Δhom2 | 12-day | 1131542 | down | GO:0006118 | 0,000820624 | electron transport     |

|               |        |         |      |            |             |                    |
|---------------|--------|---------|------|------------|-------------|--------------------|
| $\Delta$ hom2 | 12-day | 1189794 | down | GO:0006118 | 0,000820624 | electron transport |
| $\Delta$ hom2 | 12-day | 1193647 | down | GO:0006118 | 0,000820624 | electron transport |
| $\Delta$ hom2 | 12-day | 2327903 | down | GO:0006118 | 0,000820624 | electron transport |
| $\Delta$ hom2 | 12-day | 2450442 | down | GO:0006118 | 0,000820624 | electron transport |
| $\Delta$ hom2 | 12-day | 2484868 | down | GO:0006118 | 0,000820624 | electron transport |
| $\Delta$ hom2 | 12-day | 2486680 | down | GO:0006118 | 0,000820624 | electron transport |
| $\Delta$ hom2 | 12-day | 2490518 | down | GO:0006118 | 0,000820624 | electron transport |
| $\Delta$ hom2 | 12-day | 2497674 | down | GO:0006118 | 0,000820624 | electron transport |
| $\Delta$ hom2 | 12-day | 2499521 | down | GO:0006118 | 0,000820624 | electron transport |
| $\Delta$ hom2 | 12-day | 2503471 | down | GO:0006118 | 0,000820624 | electron transport |
| $\Delta$ hom2 | 12-day | 2509716 | down | GO:0006118 | 0,000820624 | electron transport |
| $\Delta$ hom2 | 12-day | 2510618 | down | GO:0006118 | 0,000820624 | electron transport |
| $\Delta$ hom2 | 12-day | 2512276 | down | GO:0006118 | 0,000820624 | electron transport |
| $\Delta$ hom2 | 12-day | 2571870 | down | GO:0006118 | 0,000820624 | electron transport |
| $\Delta$ hom2 | 12-day | 2583618 | down | GO:0006118 | 0,000820624 | electron transport |
| $\Delta$ hom2 | 12-day | 2604096 | down | GO:0006118 | 0,000820624 | electron transport |
| $\Delta$ hom2 | 12-day | 2604231 | down | GO:0006118 | 0,000820624 | electron transport |
| $\Delta$ hom2 | 12-day | 2604628 | down | GO:0006118 | 0,000820624 | electron transport |
| $\Delta$ hom2 | 12-day | 2604735 | down | GO:0006118 | 0,000820624 | electron transport |
| $\Delta$ hom2 | 12-day | 2607911 | down | GO:0006118 | 0,000820624 | electron transport |
| $\Delta$ hom2 | 12-day | 2609831 | down | GO:0006118 | 0,000820624 | electron transport |
| $\Delta$ hom2 | 12-day | 2609840 | down | GO:0006118 | 0,000820624 | electron transport |
| $\Delta$ hom2 | 12-day | 2609854 | down | GO:0006118 | 0,000820624 | electron transport |
| $\Delta$ hom2 | 12-day | 2611234 | down | GO:0006118 | 0,000820624 | electron transport |
| $\Delta$ hom2 | 12-day | 2611753 | down | GO:0006118 | 0,000820624 | electron transport |
| $\Delta$ hom2 | 12-day | 2618455 | down | GO:0006118 | 0,000820624 | electron transport |
| $\Delta$ hom2 | 12-day | 2619674 | down | GO:0006118 | 0,000820624 | electron transport |
| $\Delta$ hom2 | 12-day | 2621855 | down | GO:0006118 | 0,000820624 | electron transport |
| $\Delta$ hom2 | 12-day | 2623115 | down | GO:0006118 | 0,000820624 | electron transport |
| $\Delta$ hom2 | 12-day | 2623122 | down | GO:0006118 | 0,000820624 | electron transport |
| $\Delta$ hom2 | 12-day | 2623196 | down | GO:0006118 | 0,000820624 | electron transport |
| $\Delta$ hom2 | 12-day | 2625667 | down | GO:0006118 | 0,000820624 | electron transport |
| $\Delta$ hom2 | 12-day | 2625951 | down | GO:0006118 | 0,000820624 | electron transport |
| $\Delta$ hom2 | 12-day | 2628312 | down | GO:0006118 | 0,000820624 | electron transport |



|       |        |         |      |            |             |                    |
|-------|--------|---------|------|------------|-------------|--------------------|
| Δhom2 | 12-day | 2628645 | down | GO:0006118 | 0,000820624 | electron transport |
| Δhom2 | 12-day | 2628651 | down | GO:0006118 | 0,000820624 | electron transport |
| Δhom2 | 12-day | 2632925 | down | GO:0006118 | 0,000820624 | electron transport |
| Δhom2 | 12-day | 2633167 | down | GO:0006118 | 0,000820624 | electron transport |
| Δhom2 | 12-day | 2634283 | down | GO:0006118 | 0,000820624 | electron transport |
| Δhom2 | 12-day | 2635487 | down | GO:0006118 | 0,000820624 | electron transport |
| Δhom2 | 12-day | 2635869 | down | GO:0006118 | 0,000820624 | electron transport |
| Δhom2 | 12-day | 2636544 | down | GO:0006118 | 0,000820624 | electron transport |
| Δhom2 | 12-day | 2637104 | down | GO:0006118 | 0,000820624 | electron transport |
| Δhom2 | 12-day | 2637190 | down | GO:0006118 | 0,000820624 | electron transport |
| Δhom2 | 12-day | 2639682 | down | GO:0006118 | 0,000820624 | electron transport |
| Δhom2 | 12-day | 2644422 | down | GO:0006118 | 0,000820624 | electron transport |
| Δhom2 | 12-day | 2644430 | down | GO:0006118 | 0,000820624 | electron transport |
| Δhom2 | 12-day | 2662585 | down | GO:0006118 | 0,000820624 | electron transport |
| Δhom2 | 12-day | 2663372 | down | GO:0006118 | 0,000820624 | electron transport |
| Δhom2 | 12-day | 2668568 | down | GO:0006118 | 0,000820624 | electron transport |
| Δhom2 | 12-day | 2671376 | down | GO:0006118 | 0,000820624 | electron transport |
| Δhom2 | 12-day | 2690522 | down | GO:0006118 | 0,000820624 | electron transport |
| Δhom2 | 12-day | 2703628 | down | GO:0006118 | 0,000820624 | electron transport |
| Δhom2 | 12-day | 2703966 | down | GO:0006118 | 0,000820624 | electron transport |
| Δhom2 | 12-day | 2735179 | down | GO:0006118 | 0,000820624 | electron transport |
| Δhom2 | 12-day | 1134402 | down | GO:0005488 | 0,002534434 | binding            |
| Δhom2 | 12-day | 1152293 | down | GO:0005488 | 0,002534434 | binding            |
| Δhom2 | 12-day | 1267603 | down | GO:0005488 | 0,002534434 | binding            |
| Δhom2 | 12-day | 2085050 | down | GO:0005488 | 0,002534434 | binding            |
| Δhom2 | 12-day | 2194185 | down | GO:0005488 | 0,002534434 | binding            |
| Δhom2 | 12-day | 2255031 | down | GO:0005488 | 0,002534434 | binding            |
| Δhom2 | 12-day | 2333133 | down | GO:0005488 | 0,002534434 | binding            |
| Δhom2 | 12-day | 2373661 | down | GO:0005488 | 0,002534434 | binding            |
| Δhom2 | 12-day | 2492848 | down | GO:0005488 | 0,002534434 | binding            |
| Δhom2 | 12-day | 2492878 | down | GO:0005488 | 0,002534434 | binding            |
| Δhom2 | 12-day | 2493904 | down | GO:0005488 | 0,002534434 | binding            |
| Δhom2 | 12-day | 2494727 | down | GO:0005488 | 0,002534434 | binding            |
| Δhom2 | 12-day | 2511020 | down | GO:0005488 | 0,002534434 | binding            |

|       |        |         |      |            |             |         |
|-------|--------|---------|------|------------|-------------|---------|
| Δhom2 | 12-day | 2520877 | down | GO:0005488 | 0,002534434 | binding |
| Δhom2 | 12-day | 2541321 | down | GO:0005488 | 0,002534434 | binding |
| Δhom2 | 12-day | 2558552 | down | GO:0005488 | 0,002534434 | binding |
| Δhom2 | 12-day | 2595361 | down | GO:0005488 | 0,002534434 | binding |
| Δhom2 | 12-day | 2605752 | down | GO:0005488 | 0,002534434 | binding |
| Δhom2 | 12-day | 2606988 | down | GO:0005488 | 0,002534434 | binding |
| Δhom2 | 12-day | 2610372 | down | GO:0005488 | 0,002534434 | binding |
| Δhom2 | 12-day | 2616880 | down | GO:0005488 | 0,002534434 | binding |
| Δhom2 | 12-day | 2616916 | down | GO:0005488 | 0,002534434 | binding |
| Δhom2 | 12-day | 2618904 | down | GO:0005488 | 0,002534434 | binding |
| Δhom2 | 12-day | 2619714 | down | GO:0005488 | 0,002534434 | binding |
| Δhom2 | 12-day | 2621873 | down | GO:0005488 | 0,002534434 | binding |
| Δhom2 | 12-day | 2623301 | down | GO:0005488 | 0,002534434 | binding |
| Δhom2 | 12-day | 2624675 | down | GO:0005488 | 0,002534434 | binding |
| Δhom2 | 12-day | 2624698 | down | GO:0005488 | 0,002534434 | binding |
| Δhom2 | 12-day | 2625667 | down | GO:0005488 | 0,002534434 | binding |
| Δhom2 | 12-day | 2625782 | down | GO:0005488 | 0,002534434 | binding |
| Δhom2 | 12-day | 2626510 | down | GO:0005488 | 0,002534434 | binding |
| Δhom2 | 12-day | 2628751 | down | GO:0005488 | 0,002534434 | binding |
| Δhom2 | 12-day | 2631237 | down | GO:0005488 | 0,002534434 | binding |
| Δhom2 | 12-day | 2632611 | down | GO:0005488 | 0,002534434 | binding |
| Δhom2 | 12-day | 2633167 | down | GO:0005488 | 0,002534434 | binding |
| Δhom2 | 12-day | 2633266 | down | GO:0005488 | 0,002534434 | binding |
| Δhom2 | 12-day | 2633632 | down | GO:0005488 | 0,002534434 | binding |
| Δhom2 | 12-day | 2634450 | down | GO:0005488 | 0,002534434 | binding |
| Δhom2 | 12-day | 2637088 | down | GO:0005488 | 0,002534434 | binding |
| Δhom2 | 12-day | 2637104 | down | GO:0005488 | 0,002534434 | binding |
| Δhom2 | 12-day | 2638484 | down | GO:0005488 | 0,002534434 | binding |
| Δhom2 | 12-day | 2641506 | down | GO:0005488 | 0,002534434 | binding |
| Δhom2 | 12-day | 2644281 | down | GO:0005488 | 0,002534434 | binding |
| Δhom2 | 12-day | 2644330 | down | GO:0005488 | 0,002534434 | binding |
| Δhom2 | 12-day | 2645850 | down | GO:0005488 | 0,002534434 | binding |
| Δhom2 | 12-day | 2661491 | down | GO:0005488 | 0,002534434 | binding |
| Δhom2 | 12-day | 2673857 | down | GO:0005488 | 0,002534434 | binding |

|       |        |         |      |            |             |                                     |
|-------|--------|---------|------|------------|-------------|-------------------------------------|
| Δhom2 | 12-day | 2705421 | down | GO:0005488 | 0,002534434 | binding                             |
| Δhom2 | 12-day | 2711060 | down | GO:0005488 | 0,002534434 | binding                             |
| Δhom2 | 12-day | 2628225 | down | GO:0005199 | 0,004589545 | structural constituent of cell wall |
| Δhom2 | 12-day | 2629603 | down | GO:0005199 | 0,004589545 | structural constituent of cell wall |
| Δhom2 | 12-day | 2746250 | down | GO:0005199 | 0,004589545 | structural constituent of cell wall |
| Δhom2 | 12-day | 237513  | down | GO:0050660 | 0,004933165 | FAD binding                         |
| Δhom2 | 12-day | 2508435 | down | GO:0050660 | 0,004933165 | FAD binding                         |
| Δhom2 | 12-day | 2540746 | down | GO:0050660 | 0,004933165 | FAD binding                         |
| Δhom2 | 12-day | 2592894 | down | GO:0050660 | 0,004933165 | FAD binding                         |
| Δhom2 | 12-day | 2625667 | down | GO:0050660 | 0,004933165 | FAD binding                         |
| Δhom2 | 12-day | 2642607 | down | GO:0050660 | 0,004933165 | FAD binding                         |
| Δhom2 | 12-day | 2643025 | down | GO:0050660 | 0,004933165 | FAD binding                         |
| Δhom2 | 12-day | 2663372 | down | GO:0050660 | 0,004933165 | FAD binding                         |
| Δhom2 | 12-day | 2688172 | down | GO:0050660 | 0,004933165 | FAD binding                         |
| Δhom2 | 12-day | 2630193 | down | GO:0000786 | 0,004933165 | nucleosome                          |
| Δhom2 | 12-day | 78628   | down | GO:0020037 | 0,004933165 | heme binding                        |
| Δhom2 | 12-day | 81631   | down | GO:0020037 | 0,004933165 | heme binding                        |
| Δhom2 | 12-day | 1131542 | down | GO:0020037 | 0,004933165 | heme binding                        |
| Δhom2 | 12-day | 1189794 | down | GO:0020037 | 0,004933165 | heme binding                        |
| Δhom2 | 12-day | 1193647 | down | GO:0020037 | 0,004933165 | heme binding                        |
| Δhom2 | 12-day | 2327903 | down | GO:0020037 | 0,004933165 | heme binding                        |
| Δhom2 | 12-day | 2376858 | down | GO:0020037 | 0,004933165 | heme binding                        |
| Δhom2 | 12-day | 2484868 | down | GO:0020037 | 0,004933165 | heme binding                        |
| Δhom2 | 12-day | 2486680 | down | GO:0020037 | 0,004933165 | heme binding                        |
| Δhom2 | 12-day | 2497674 | down | GO:0020037 | 0,004933165 | heme binding                        |
| Δhom2 | 12-day | 2509716 | down | GO:0020037 | 0,004933165 | heme binding                        |
| Δhom2 | 12-day | 2510618 | down | GO:0020037 | 0,004933165 | heme binding                        |
| Δhom2 | 12-day | 2512276 | down | GO:0020037 | 0,004933165 | heme binding                        |
| Δhom2 | 12-day | 2583618 | down | GO:0020037 | 0,004933165 | heme binding                        |
| Δhom2 | 12-day | 2604096 | down | GO:0020037 | 0,004933165 | heme binding                        |
| Δhom2 | 12-day | 2604231 | down | GO:0020037 | 0,004933165 | heme binding                        |
| Δhom2 | 12-day | 2604628 | down | GO:0020037 | 0,004933165 | heme binding                        |
| Δhom2 | 12-day | 2604735 | down | GO:0020037 | 0,004933165 | heme binding                        |
| Δhom2 | 12-day | 2607911 | down | GO:0020037 | 0,004933165 | heme binding                        |

|       |        |         |      |            |             |                                |
|-------|--------|---------|------|------------|-------------|--------------------------------|
| Δhom2 | 12-day | 2609840 | down | GO:0020037 | 0,004933165 | heme binding                   |
| Δhom2 | 12-day | 2609854 | down | GO:0020037 | 0,004933165 | heme binding                   |
| Δhom2 | 12-day | 2611234 | down | GO:0020037 | 0,004933165 | heme binding                   |
| Δhom2 | 12-day | 2619674 | down | GO:0020037 | 0,004933165 | heme binding                   |
| Δhom2 | 12-day | 2621855 | down | GO:0020037 | 0,004933165 | heme binding                   |
| Δhom2 | 12-day | 2623115 | down | GO:0020037 | 0,004933165 | heme binding                   |
| Δhom2 | 12-day | 2623122 | down | GO:0020037 | 0,004933165 | heme binding                   |
| Δhom2 | 12-day | 2623196 | down | GO:0020037 | 0,004933165 | heme binding                   |
| Δhom2 | 12-day | 2624504 | down | GO:0020037 | 0,004933165 | heme binding                   |
| Δhom2 | 12-day | 2628312 | down | GO:0020037 | 0,004933165 | heme binding                   |
| Δhom2 | 12-day | 2628645 | down | GO:0020037 | 0,004933165 | heme binding                   |
| Δhom2 | 12-day | 2628651 | down | GO:0020037 | 0,004933165 | heme binding                   |
| Δhom2 | 12-day | 2632925 | down | GO:0020037 | 0,004933165 | heme binding                   |
| Δhom2 | 12-day | 2634283 | down | GO:0020037 | 0,004933165 | heme binding                   |
| Δhom2 | 12-day | 2635487 | down | GO:0020037 | 0,004933165 | heme binding                   |
| Δhom2 | 12-day | 2635869 | down | GO:0020037 | 0,004933165 | heme binding                   |
| Δhom2 | 12-day | 2636160 | down | GO:0020037 | 0,004933165 | heme binding                   |
| Δhom2 | 12-day | 2636544 | down | GO:0020037 | 0,004933165 | heme binding                   |
| Δhom2 | 12-day | 2637190 | down | GO:0020037 | 0,004933165 | heme binding                   |
| Δhom2 | 12-day | 2668568 | down | GO:0020037 | 0,004933165 | heme binding                   |
| Δhom2 | 12-day | 2690522 | down | GO:0020037 | 0,004933165 | heme binding                   |
| Δhom2 | 12-day | 2703628 | down | GO:0020037 | 0,004933165 | heme binding                   |
| Δhom2 | 12-day | 2703966 | down | GO:0020037 | 0,004933165 | heme binding                   |
| Δhom2 | 12-day | 2735179 | down | GO:0020037 | 0,004933165 | heme binding                   |
| Δhom2 | 12-day | 2614257 | down | GO:0005618 | 0,006109402 | cell wall                      |
| Δhom2 | 12-day | 2628225 | down | GO:0005618 | 0,006109402 | cell wall                      |
| Δhom2 | 12-day | 2629603 | down | GO:0005618 | 0,006109402 | cell wall                      |
| Δhom2 | 12-day | 2630193 | down | GO:0006334 | 0,010571833 | nucleosome assembly            |
| Δhom2 | 12-day | 2637783 | down | GO:0016831 | 0,01844007  | carboxy-lyase activity         |
| Δhom2 | 12-day | 1144263 | down | GO:0008733 | 0,024265206 | L-arabinose isomerase activity |
| Δhom2 | 12-day | 1153136 | down | GO:0008733 | 0,024265206 | L-arabinose isomerase activity |
| Δhom2 | 12-day | 2509716 | down | GO:0008733 | 0,024265206 | L-arabinose isomerase activity |
| Δhom2 | 12-day | 2516374 | down | GO:0008733 | 0,024265206 | L-arabinose isomerase activity |
| Δhom2 | 12-day | 2613255 | down | GO:0008733 | 0,024265206 | L-arabinose isomerase activity |

|               |        |         |      |            |             |                                   |
|---------------|--------|---------|------|------------|-------------|-----------------------------------|
| $\Delta$ hom2 | 12-day | 2622598 | down | GO:0008733 | 0,024265206 | L-arabinose isomerase activity    |
| $\Delta$ hom2 | 12-day | 2627703 | down | GO:0008733 | 0,024265206 | L-arabinose isomerase activity    |
| $\Delta$ hom2 | 12-day | 2629091 | down | GO:0008733 | 0,024265206 | L-arabinose isomerase activity    |
| $\Delta$ hom2 | 12-day | 2701571 | down | GO:0008733 | 0,024265206 | L-arabinose isomerase activity    |
| $\Delta$ hom2 | 12-day | 59565   | down | GO:0008843 | 0,026460585 | endochitinase activity            |
| $\Delta$ hom2 | 12-day | 2623305 | down | GO:0008843 | 0,026460585 | endochitinase activity            |
| $\Delta$ hom2 | 12-day | 2633726 | down | GO:0008843 | 0,026460585 | endochitinase activity            |
| $\Delta$ hom2 | 12-day | 59565   | down | GO:0004568 | 0,026460585 | chitinase activity                |
| $\Delta$ hom2 | 12-day | 2623305 | down | GO:0004568 | 0,026460585 | chitinase activity                |
| $\Delta$ hom2 | 12-day | 2633726 | down | GO:0004568 | 0,026460585 | chitinase activity                |
| $\Delta$ hom2 | 12-day | 238601  | down | GO:0005351 | 0,042665445 | sugar:hydrogen symporter activity |
| $\Delta$ hom2 | 12-day | 1144263 | down | GO:0005351 | 0,042665445 | sugar:hydrogen symporter activity |
| $\Delta$ hom2 | 12-day | 2516374 | down | GO:0005351 | 0,042665445 | sugar:hydrogen symporter activity |
| $\Delta$ hom2 | 12-day | 2604984 | down | GO:0005351 | 0,042665445 | sugar:hydrogen symporter activity |
| $\Delta$ hom2 | 12-day | 2613255 | down | GO:0005351 | 0,042665445 | sugar:hydrogen symporter activity |
| $\Delta$ hom2 | 12-day | 2622598 | down | GO:0005351 | 0,042665445 | sugar:hydrogen symporter activity |
| $\Delta$ hom2 | 12-day | 2627703 | down | GO:0005351 | 0,042665445 | sugar:hydrogen symporter activity |
| $\Delta$ hom2 | 12-day | 2629091 | down | GO:0005351 | 0,042665445 | sugar:hydrogen symporter activity |
| $\Delta$ hom2 | 12-day | 2662585 | down | GO:0005351 | 0,042665445 | sugar:hydrogen symporter activity |
| $\Delta$ hom2 | 12-day | 2701571 | down | GO:0005351 | 0,042665445 | sugar:hydrogen symporter activity |
| $\Delta$ wc1  | 12-day | 1083109 | up   | GO:0005506 | 1,08E-12    | iron ion binding                  |
| $\Delta$ wc1  | 12-day | 1120318 | up   | GO:0005506 | 1,08E-12    | iron ion binding                  |
| $\Delta$ wc1  | 12-day | 1147397 | up   | GO:0005506 | 1,08E-12    | iron ion binding                  |
| $\Delta$ wc1  | 12-day | 1173144 | up   | GO:0005506 | 1,08E-12    | iron ion binding                  |
| $\Delta$ wc1  | 12-day | 2364606 | up   | GO:0005506 | 1,08E-12    | iron ion binding                  |
| $\Delta$ wc1  | 12-day | 2491624 | up   | GO:0005506 | 1,08E-12    | iron ion binding                  |
| $\Delta$ wc1  | 12-day | 2493935 | up   | GO:0005506 | 1,08E-12    | iron ion binding                  |
| $\Delta$ wc1  | 12-day | 2501258 | up   | GO:0005506 | 1,08E-12    | iron ion binding                  |
| $\Delta$ wc1  | 12-day | 2514636 | up   | GO:0005506 | 1,08E-12    | iron ion binding                  |
| $\Delta$ wc1  | 12-day | 2537529 | up   | GO:0005506 | 1,08E-12    | iron ion binding                  |
| $\Delta$ wc1  | 12-day | 2547557 | up   | GO:0005506 | 1,08E-12    | iron ion binding                  |
| $\Delta$ wc1  | 12-day | 2559987 | up   | GO:0005506 | 1,08E-12    | iron ion binding                  |
| $\Delta$ wc1  | 12-day | 2619716 | up   | GO:0005506 | 1,08E-12    | iron ion binding                  |
| $\Delta$ wc1  | 12-day | 2620407 | up   | GO:0005506 | 1,08E-12    | iron ion binding                  |

|      |        |         |    |            |          |                  |
|------|--------|---------|----|------------|----------|------------------|
| Δwc1 | 12-day | 2625023 | up | GO:0005506 | 1,08E-12 | iron ion binding |
| Δwc1 | 12-day | 2626841 | up | GO:0005506 | 1,08E-12 | iron ion binding |
| Δwc1 | 12-day | 2628300 | up | GO:0005506 | 1,08E-12 | iron ion binding |
| Δwc1 | 12-day | 2629308 | up | GO:0005506 | 1,08E-12 | iron ion binding |
| Δwc1 | 12-day | 2635949 | up | GO:0005506 | 1,08E-12 | iron ion binding |
| Δwc1 | 12-day | 2637467 | up | GO:0005506 | 1,08E-12 | iron ion binding |
| Δwc1 | 12-day | 2638350 | up | GO:0005506 | 1,08E-12 | iron ion binding |
| Δwc1 | 12-day | 2640550 | up | GO:0005506 | 1,08E-12 | iron ion binding |
| Δwc1 | 12-day | 2666440 | up | GO:0005506 | 1,08E-12 | iron ion binding |
| Δwc1 | 12-day | 2695849 | up | GO:0005506 | 1,08E-12 | iron ion binding |
| Δwc1 | 12-day | 2703965 | up | GO:0005506 | 1,08E-12 | iron ion binding |
| Δwc1 | 12-day | 1083109 | up | GO:0020037 | 3,49E-11 | heme binding     |
| Δwc1 | 12-day | 1120318 | up | GO:0020037 | 3,49E-11 | heme binding     |
| Δwc1 | 12-day | 1147397 | up | GO:0020037 | 3,49E-11 | heme binding     |
| Δwc1 | 12-day | 1173144 | up | GO:0020037 | 3,49E-11 | heme binding     |
| Δwc1 | 12-day | 2364606 | up | GO:0020037 | 3,49E-11 | heme binding     |
| Δwc1 | 12-day | 2491624 | up | GO:0020037 | 3,49E-11 | heme binding     |
| Δwc1 | 12-day | 2501258 | up | GO:0020037 | 3,49E-11 | heme binding     |
| Δwc1 | 12-day | 2514636 | up | GO:0020037 | 3,49E-11 | heme binding     |
| Δwc1 | 12-day | 2537529 | up | GO:0020037 | 3,49E-11 | heme binding     |
| Δwc1 | 12-day | 2547557 | up | GO:0020037 | 3,49E-11 | heme binding     |
| Δwc1 | 12-day | 2559987 | up | GO:0020037 | 3,49E-11 | heme binding     |
| Δwc1 | 12-day | 2583399 | up | GO:0020037 | 3,49E-11 | heme binding     |
| Δwc1 | 12-day | 2608091 | up | GO:0020037 | 3,49E-11 | heme binding     |
| Δwc1 | 12-day | 2619716 | up | GO:0020037 | 3,49E-11 | heme binding     |
| Δwc1 | 12-day | 2620407 | up | GO:0020037 | 3,49E-11 | heme binding     |
| Δwc1 | 12-day | 2625023 | up | GO:0020037 | 3,49E-11 | heme binding     |
| Δwc1 | 12-day | 2626841 | up | GO:0020037 | 3,49E-11 | heme binding     |
| Δwc1 | 12-day | 2628300 | up | GO:0020037 | 3,49E-11 | heme binding     |
| Δwc1 | 12-day | 2629308 | up | GO:0020037 | 3,49E-11 | heme binding     |
| Δwc1 | 12-day | 2635949 | up | GO:0020037 | 3,49E-11 | heme binding     |
| Δwc1 | 12-day | 2637467 | up | GO:0020037 | 3,49E-11 | heme binding     |
| Δwc1 | 12-day | 2638350 | up | GO:0020037 | 3,49E-11 | heme binding     |
| Δwc1 | 12-day | 2640550 | up | GO:0020037 | 3,49E-11 | heme binding     |

|      |        |         |    |            |          |                        |
|------|--------|---------|----|------------|----------|------------------------|
| Δwc1 | 12-day | 2640585 | up | GO:0020037 | 3,49E-11 | heme binding           |
| Δwc1 | 12-day | 2643274 | up | GO:0020037 | 3,49E-11 | heme binding           |
| Δwc1 | 12-day | 2666440 | up | GO:0020037 | 3,49E-11 | heme binding           |
| Δwc1 | 12-day | 2673121 | up | GO:0020037 | 3,49E-11 | heme binding           |
| Δwc1 | 12-day | 2695849 | up | GO:0020037 | 3,49E-11 | heme binding           |
| Δwc1 | 12-day | 2703965 | up | GO:0020037 | 3,49E-11 | heme binding           |
| Δwc1 | 12-day | 1120318 | up | GO:0004497 | 5,17E-10 | monooxygenase activity |
| Δwc1 | 12-day | 1147397 | up | GO:0004497 | 5,17E-10 | monooxygenase activity |
| Δwc1 | 12-day | 1168026 | up | GO:0004497 | 5,17E-10 | monooxygenase activity |
| Δwc1 | 12-day | 1173144 | up | GO:0004497 | 5,17E-10 | monooxygenase activity |
| Δwc1 | 12-day | 1342670 | up | GO:0004497 | 5,17E-10 | monooxygenase activity |
| Δwc1 | 12-day | 2213880 | up | GO:0004497 | 5,17E-10 | monooxygenase activity |
| Δwc1 | 12-day | 2364606 | up | GO:0004497 | 5,17E-10 | monooxygenase activity |
| Δwc1 | 12-day | 2490194 | up | GO:0004497 | 5,17E-10 | monooxygenase activity |
| Δwc1 | 12-day | 2491624 | up | GO:0004497 | 5,17E-10 | monooxygenase activity |
| Δwc1 | 12-day | 2501258 | up | GO:0004497 | 5,17E-10 | monooxygenase activity |
| Δwc1 | 12-day | 2514636 | up | GO:0004497 | 5,17E-10 | monooxygenase activity |
| Δwc1 | 12-day | 2537529 | up | GO:0004497 | 5,17E-10 | monooxygenase activity |
| Δwc1 | 12-day | 2547557 | up | GO:0004497 | 5,17E-10 | monooxygenase activity |
| Δwc1 | 12-day | 2559987 | up | GO:0004497 | 5,17E-10 | monooxygenase activity |
| Δwc1 | 12-day | 2573393 | up | GO:0004497 | 5,17E-10 | monooxygenase activity |
| Δwc1 | 12-day | 2573396 | up | GO:0004497 | 5,17E-10 | monooxygenase activity |
| Δwc1 | 12-day | 2619716 | up | GO:0004497 | 5,17E-10 | monooxygenase activity |
| Δwc1 | 12-day | 2620407 | up | GO:0004497 | 5,17E-10 | monooxygenase activity |
| Δwc1 | 12-day | 2625023 | up | GO:0004497 | 5,17E-10 | monooxygenase activity |
| Δwc1 | 12-day | 2626841 | up | GO:0004497 | 5,17E-10 | monooxygenase activity |
| Δwc1 | 12-day | 2628300 | up | GO:0004497 | 5,17E-10 | monooxygenase activity |
| Δwc1 | 12-day | 2629308 | up | GO:0004497 | 5,17E-10 | monooxygenase activity |
| Δwc1 | 12-day | 2635949 | up | GO:0004497 | 5,17E-10 | monooxygenase activity |
| Δwc1 | 12-day | 2637467 | up | GO:0004497 | 5,17E-10 | monooxygenase activity |
| Δwc1 | 12-day | 2638350 | up | GO:0004497 | 5,17E-10 | monooxygenase activity |
| Δwc1 | 12-day | 2640550 | up | GO:0004497 | 5,17E-10 | monooxygenase activity |
| Δwc1 | 12-day | 2666440 | up | GO:0004497 | 5,17E-10 | monooxygenase activity |
| Δwc1 | 12-day | 2695849 | up | GO:0004497 | 5,17E-10 | monooxygenase activity |

|              |        |         |    |            |          |                        |
|--------------|--------|---------|----|------------|----------|------------------------|
| $\Delta$ wc1 | 12-day | 2703927 | up | GO:0004497 | 5,17E-10 | monooxygenase activity |
| $\Delta$ wc1 | 12-day | 2703965 | up | GO:0004497 | 5,17E-10 | monooxygenase activity |
| $\Delta$ wc1 | 12-day | 1120318 | up | GO:0006118 | 1,18E-08 | electron transport     |
| $\Delta$ wc1 | 12-day | 1147397 | up | GO:0006118 | 1,18E-08 | electron transport     |
| $\Delta$ wc1 | 12-day | 1168026 | up | GO:0006118 | 1,18E-08 | electron transport     |
| $\Delta$ wc1 | 12-day | 1173144 | up | GO:0006118 | 1,18E-08 | electron transport     |
| $\Delta$ wc1 | 12-day | 1215660 | up | GO:0006118 | 1,18E-08 | electron transport     |
| $\Delta$ wc1 | 12-day | 1342670 | up | GO:0006118 | 1,18E-08 | electron transport     |
| $\Delta$ wc1 | 12-day | 2213880 | up | GO:0006118 | 1,18E-08 | electron transport     |
| $\Delta$ wc1 | 12-day | 2364606 | up | GO:0006118 | 1,18E-08 | electron transport     |
| $\Delta$ wc1 | 12-day | 2457440 | up | GO:0006118 | 1,18E-08 | electron transport     |
| $\Delta$ wc1 | 12-day | 2490194 | up | GO:0006118 | 1,18E-08 | electron transport     |
| $\Delta$ wc1 | 12-day | 2491624 | up | GO:0006118 | 1,18E-08 | electron transport     |
| $\Delta$ wc1 | 12-day | 2501258 | up | GO:0006118 | 1,18E-08 | electron transport     |
| $\Delta$ wc1 | 12-day | 2505277 | up | GO:0006118 | 1,18E-08 | electron transport     |
| $\Delta$ wc1 | 12-day | 2508276 | up | GO:0006118 | 1,18E-08 | electron transport     |
| $\Delta$ wc1 | 12-day | 2514636 | up | GO:0006118 | 1,18E-08 | electron transport     |
| $\Delta$ wc1 | 12-day | 2537529 | up | GO:0006118 | 1,18E-08 | electron transport     |
| $\Delta$ wc1 | 12-day | 2547557 | up | GO:0006118 | 1,18E-08 | electron transport     |
| $\Delta$ wc1 | 12-day | 2559987 | up | GO:0006118 | 1,18E-08 | electron transport     |
| $\Delta$ wc1 | 12-day | 2573393 | up | GO:0006118 | 1,18E-08 | electron transport     |
| $\Delta$ wc1 | 12-day | 2573396 | up | GO:0006118 | 1,18E-08 | electron transport     |
| $\Delta$ wc1 | 12-day | 2583399 | up | GO:0006118 | 1,18E-08 | electron transport     |
| $\Delta$ wc1 | 12-day | 2594205 | up | GO:0006118 | 1,18E-08 | electron transport     |
| $\Delta$ wc1 | 12-day | 2605889 | up | GO:0006118 | 1,18E-08 | electron transport     |
| $\Delta$ wc1 | 12-day | 2608235 | up | GO:0006118 | 1,18E-08 | electron transport     |
| $\Delta$ wc1 | 12-day | 2615184 | up | GO:0006118 | 1,18E-08 | electron transport     |
| $\Delta$ wc1 | 12-day | 2616557 | up | GO:0006118 | 1,18E-08 | electron transport     |
| $\Delta$ wc1 | 12-day | 2619716 | up | GO:0006118 | 1,18E-08 | electron transport     |
| $\Delta$ wc1 | 12-day | 2620407 | up | GO:0006118 | 1,18E-08 | electron transport     |
| $\Delta$ wc1 | 12-day | 2622733 | up | GO:0006118 | 1,18E-08 | electron transport     |
| $\Delta$ wc1 | 12-day | 2625023 | up | GO:0006118 | 1,18E-08 | electron transport     |
| $\Delta$ wc1 | 12-day | 2625730 | up | GO:0006118 | 1,18E-08 | electron transport     |
| $\Delta$ wc1 | 12-day | 2626841 | up | GO:0006118 | 1,18E-08 | electron transport     |



|              |        |         |    |            |          |                                   |
|--------------|--------|---------|----|------------|----------|-----------------------------------|
| $\Delta$ wc1 | 12-day | 2628120 | up | GO:0006118 | 1,18E-08 | electron transport                |
| $\Delta$ wc1 | 12-day | 2628300 | up | GO:0006118 | 1,18E-08 | electron transport                |
| $\Delta$ wc1 | 12-day | 2629308 | up | GO:0006118 | 1,18E-08 | electron transport                |
| $\Delta$ wc1 | 12-day | 2635949 | up | GO:0006118 | 1,18E-08 | electron transport                |
| $\Delta$ wc1 | 12-day | 2637467 | up | GO:0006118 | 1,18E-08 | electron transport                |
| $\Delta$ wc1 | 12-day | 2638350 | up | GO:0006118 | 1,18E-08 | electron transport                |
| $\Delta$ wc1 | 12-day | 2638473 | up | GO:0006118 | 1,18E-08 | electron transport                |
| $\Delta$ wc1 | 12-day | 2640550 | up | GO:0006118 | 1,18E-08 | electron transport                |
| $\Delta$ wc1 | 12-day | 2643274 | up | GO:0006118 | 1,18E-08 | electron transport                |
| $\Delta$ wc1 | 12-day | 2645843 | up | GO:0006118 | 1,18E-08 | electron transport                |
| $\Delta$ wc1 | 12-day | 2666009 | up | GO:0006118 | 1,18E-08 | electron transport                |
| $\Delta$ wc1 | 12-day | 2666440 | up | GO:0006118 | 1,18E-08 | electron transport                |
| $\Delta$ wc1 | 12-day | 2667289 | up | GO:0006118 | 1,18E-08 | electron transport                |
| $\Delta$ wc1 | 12-day | 2695849 | up | GO:0006118 | 1,18E-08 | electron transport                |
| $\Delta$ wc1 | 12-day | 2698211 | up | GO:0006118 | 1,18E-08 | electron transport                |
| $\Delta$ wc1 | 12-day | 2703927 | up | GO:0006118 | 1,18E-08 | electron transport                |
| $\Delta$ wc1 | 12-day | 2703965 | up | GO:0006118 | 1,18E-08 | electron transport                |
| $\Delta$ wc1 | 12-day | 1120318 | up | GO:0050381 | 3,23E-08 | unspecific monooxygenase activity |
| $\Delta$ wc1 | 12-day | 2491624 | up | GO:0050381 | 3,23E-08 | unspecific monooxygenase activity |
| $\Delta$ wc1 | 12-day | 2514636 | up | GO:0050381 | 3,23E-08 | unspecific monooxygenase activity |
| $\Delta$ wc1 | 12-day | 2547557 | up | GO:0050381 | 3,23E-08 | unspecific monooxygenase activity |
| $\Delta$ wc1 | 12-day | 2559987 | up | GO:0050381 | 3,23E-08 | unspecific monooxygenase activity |
| $\Delta$ wc1 | 12-day | 2619716 | up | GO:0050381 | 3,23E-08 | unspecific monooxygenase activity |
| $\Delta$ wc1 | 12-day | 2620407 | up | GO:0050381 | 3,23E-08 | unspecific monooxygenase activity |
| $\Delta$ wc1 | 12-day | 2625023 | up | GO:0050381 | 3,23E-08 | unspecific monooxygenase activity |
| $\Delta$ wc1 | 12-day | 2637467 | up | GO:0050381 | 3,23E-08 | unspecific monooxygenase activity |
| $\Delta$ wc1 | 12-day | 2638350 | up | GO:0050381 | 3,23E-08 | unspecific monooxygenase activity |
| $\Delta$ wc1 | 12-day | 2666440 | up | GO:0050381 | 3,23E-08 | unspecific monooxygenase activity |
| $\Delta$ wc1 | 12-day | 2703965 | up | GO:0050381 | 3,23E-08 | unspecific monooxygenase activity |
| $\Delta$ wc1 | 12-day | 66483   | up | GO:0005975 | 3,11E-07 | carbohydrate metabolic process    |
| $\Delta$ wc1 | 12-day | 85210   | up | GO:0005975 | 3,11E-07 | carbohydrate metabolic process    |
| $\Delta$ wc1 | 12-day | 234329  | up | GO:0005975 | 3,11E-07 | carbohydrate metabolic process    |
| $\Delta$ wc1 | 12-day | 2486953 | up | GO:0005975 | 3,11E-07 | carbohydrate metabolic process    |
| $\Delta$ wc1 | 12-day | 2493241 | up | GO:0005975 | 3,11E-07 | carbohydrate metabolic process    |

|      |        |         |    |            |          |                                                      |
|------|--------|---------|----|------------|----------|------------------------------------------------------|
| Δwc1 | 12-day | 2514546 | up | GO:0005975 | 3,11E-07 | carbohydrate metabolic process                       |
| Δwc1 | 12-day | 2570936 | up | GO:0005975 | 3,11E-07 | carbohydrate metabolic process                       |
| Δwc1 | 12-day | 2613657 | up | GO:0005975 | 3,11E-07 | carbohydrate metabolic process                       |
| Δwc1 | 12-day | 2621806 | up | GO:0005975 | 3,11E-07 | carbohydrate metabolic process                       |
| Δwc1 | 12-day | 2622563 | up | GO:0005975 | 3,11E-07 | carbohydrate metabolic process                       |
| Δwc1 | 12-day | 2624823 | up | GO:0005975 | 3,11E-07 | carbohydrate metabolic process                       |
| Δwc1 | 12-day | 2628008 | up | GO:0005975 | 3,11E-07 | carbohydrate metabolic process                       |
| Δwc1 | 12-day | 2633791 | up | GO:0005975 | 3,11E-07 | carbohydrate metabolic process                       |
| Δwc1 | 12-day | 2634915 | up | GO:0005975 | 3,11E-07 | carbohydrate metabolic process                       |
| Δwc1 | 12-day | 2637065 | up | GO:0005975 | 3,11E-07 | carbohydrate metabolic process                       |
| Δwc1 | 12-day | 2641020 | up | GO:0005975 | 3,11E-07 | carbohydrate metabolic process                       |
| Δwc1 | 12-day | 2642958 | up | GO:0005975 | 3,11E-07 | carbohydrate metabolic process                       |
| Δwc1 | 12-day | 2643740 | up | GO:0005975 | 3,11E-07 | carbohydrate metabolic process                       |
| Δwc1 | 12-day | 2644666 | up | GO:0005975 | 3,11E-07 | carbohydrate metabolic process                       |
| Δwc1 | 12-day | 2670422 | up | GO:0005975 | 3,11E-07 | carbohydrate metabolic process                       |
| Δwc1 | 12-day | 2686544 | up | GO:0005975 | 3,11E-07 | carbohydrate metabolic process                       |
| Δwc1 | 12-day | 2706622 | up | GO:0005975 | 3,11E-07 | carbohydrate metabolic process                       |
| Δwc1 | 12-day | 85210   | up | GO:0004553 | 4,47E-06 | hydrolase activity, hydrolyzing O-glycosyl compounds |
| Δwc1 | 12-day | 234329  | up | GO:0004553 | 4,47E-06 | hydrolase activity, hydrolyzing O-glycosyl compounds |
| Δwc1 | 12-day | 2486953 | up | GO:0004553 | 4,47E-06 | hydrolase activity, hydrolyzing O-glycosyl compounds |
| Δwc1 | 12-day | 2613657 | up | GO:0004553 | 4,47E-06 | hydrolase activity, hydrolyzing O-glycosyl compounds |
| Δwc1 | 12-day | 2621806 | up | GO:0004553 | 4,47E-06 | hydrolase activity, hydrolyzing O-glycosyl compounds |
| Δwc1 | 12-day | 2622563 | up | GO:0004553 | 4,47E-06 | hydrolase activity, hydrolyzing O-glycosyl compounds |
| Δwc1 | 12-day | 2637065 | up | GO:0004553 | 4,47E-06 | hydrolase activity, hydrolyzing O-glycosyl compounds |
| Δwc1 | 12-day | 2642958 | up | GO:0004553 | 4,47E-06 | hydrolase activity, hydrolyzing O-glycosyl compounds |
| Δwc1 | 12-day | 2643740 | up | GO:0004553 | 4,47E-06 | hydrolase activity, hydrolyzing O-glycosyl compounds |
| Δwc1 | 12-day | 2644666 | up | GO:0004553 | 4,47E-06 | hydrolase activity, hydrolyzing O-glycosyl compounds |
| Δwc1 | 12-day | 2670422 | up | GO:0004553 | 4,47E-06 | hydrolase activity, hydrolyzing O-glycosyl compounds |
| Δwc1 | 12-day | 2686544 | up | GO:0004553 | 4,47E-06 | hydrolase activity, hydrolyzing O-glycosyl compounds |
| Δwc1 | 12-day | 2706622 | up | GO:0004553 | 4,47E-06 | hydrolase activity, hydrolyzing O-glycosyl compounds |
| Δwc1 | 12-day | 258402  | up | GO:0005524 | 1,55E-05 | ATP binding                                          |
| Δwc1 | 12-day | 1129062 | up | GO:0005524 | 1,55E-05 | ATP binding                                          |
| Δwc1 | 12-day | 1158800 | up | GO:0005524 | 1,55E-05 | ATP binding                                          |
| Δwc1 | 12-day | 1172108 | up | GO:0005524 | 1,55E-05 | ATP binding                                          |

|              |        |         |    |            |          |             |
|--------------|--------|---------|----|------------|----------|-------------|
| $\Delta$ wc1 | 12-day | 1174869 | up | GO:0005524 | 1,55E-05 | ATP binding |
| $\Delta$ wc1 | 12-day | 1178759 | up | GO:0005524 | 1,55E-05 | ATP binding |
| $\Delta$ wc1 | 12-day | 1181112 | up | GO:0005524 | 1,55E-05 | ATP binding |
| $\Delta$ wc1 | 12-day | 1186310 | up | GO:0005524 | 1,55E-05 | ATP binding |
| $\Delta$ wc1 | 12-day | 1196424 | up | GO:0005524 | 1,55E-05 | ATP binding |
| $\Delta$ wc1 | 12-day | 2253810 | up | GO:0005524 | 1,55E-05 | ATP binding |
| $\Delta$ wc1 | 12-day | 2279823 | up | GO:0005524 | 1,55E-05 | ATP binding |
| $\Delta$ wc1 | 12-day | 2481145 | up | GO:0005524 | 1,55E-05 | ATP binding |
| $\Delta$ wc1 | 12-day | 2484841 | up | GO:0005524 | 1,55E-05 | ATP binding |
| $\Delta$ wc1 | 12-day | 2486797 | up | GO:0005524 | 1,55E-05 | ATP binding |
| $\Delta$ wc1 | 12-day | 2487176 | up | GO:0005524 | 1,55E-05 | ATP binding |
| $\Delta$ wc1 | 12-day | 2490823 | up | GO:0005524 | 1,55E-05 | ATP binding |
| $\Delta$ wc1 | 12-day | 2493556 | up | GO:0005524 | 1,55E-05 | ATP binding |
| $\Delta$ wc1 | 12-day | 2503832 | up | GO:0005524 | 1,55E-05 | ATP binding |
| $\Delta$ wc1 | 12-day | 2510275 | up | GO:0005524 | 1,55E-05 | ATP binding |
| $\Delta$ wc1 | 12-day | 2511561 | up | GO:0005524 | 1,55E-05 | ATP binding |
| $\Delta$ wc1 | 12-day | 2527752 | up | GO:0005524 | 1,55E-05 | ATP binding |
| $\Delta$ wc1 | 12-day | 2533371 | up | GO:0005524 | 1,55E-05 | ATP binding |
| $\Delta$ wc1 | 12-day | 2535527 | up | GO:0005524 | 1,55E-05 | ATP binding |
| $\Delta$ wc1 | 12-day | 2550939 | up | GO:0005524 | 1,55E-05 | ATP binding |
| $\Delta$ wc1 | 12-day | 2553325 | up | GO:0005524 | 1,55E-05 | ATP binding |
| $\Delta$ wc1 | 12-day | 2554917 | up | GO:0005524 | 1,55E-05 | ATP binding |
| $\Delta$ wc1 | 12-day | 2563653 | up | GO:0005524 | 1,55E-05 | ATP binding |
| $\Delta$ wc1 | 12-day | 2565471 | up | GO:0005524 | 1,55E-05 | ATP binding |
| $\Delta$ wc1 | 12-day | 2569377 | up | GO:0005524 | 1,55E-05 | ATP binding |
| $\Delta$ wc1 | 12-day | 2585708 | up | GO:0005524 | 1,55E-05 | ATP binding |
| $\Delta$ wc1 | 12-day | 2601543 | up | GO:0005524 | 1,55E-05 | ATP binding |
| $\Delta$ wc1 | 12-day | 2605230 | up | GO:0005524 | 1,55E-05 | ATP binding |
| $\Delta$ wc1 | 12-day | 2606202 | up | GO:0005524 | 1,55E-05 | ATP binding |
| $\Delta$ wc1 | 12-day | 2610180 | up | GO:0005524 | 1,55E-05 | ATP binding |
| $\Delta$ wc1 | 12-day | 2611700 | up | GO:0005524 | 1,55E-05 | ATP binding |
| $\Delta$ wc1 | 12-day | 2612206 | up | GO:0005524 | 1,55E-05 | ATP binding |
| $\Delta$ wc1 | 12-day | 2612608 | up | GO:0005524 | 1,55E-05 | ATP binding |
| $\Delta$ wc1 | 12-day | 2614625 | up | GO:0005524 | 1,55E-05 | ATP binding |

|              |        |         |    |            |             |                                                                       |
|--------------|--------|---------|----|------------|-------------|-----------------------------------------------------------------------|
| $\Delta$ wc1 | 12-day | 2614856 | up | GO:0005524 | 1,55E-05    | ATP binding                                                           |
| $\Delta$ wc1 | 12-day | 2620969 | up | GO:0005524 | 1,55E-05    | ATP binding                                                           |
| $\Delta$ wc1 | 12-day | 2621533 | up | GO:0005524 | 1,55E-05    | ATP binding                                                           |
| $\Delta$ wc1 | 12-day | 2621626 | up | GO:0005524 | 1,55E-05    | ATP binding                                                           |
| $\Delta$ wc1 | 12-day | 2621741 | up | GO:0005524 | 1,55E-05    | ATP binding                                                           |
| $\Delta$ wc1 | 12-day | 2623257 | up | GO:0005524 | 1,55E-05    | ATP binding                                                           |
| $\Delta$ wc1 | 12-day | 2623685 | up | GO:0005524 | 1,55E-05    | ATP binding                                                           |
| $\Delta$ wc1 | 12-day | 2631390 | up | GO:0005524 | 1,55E-05    | ATP binding                                                           |
| $\Delta$ wc1 | 12-day | 2632313 | up | GO:0005524 | 1,55E-05    | ATP binding                                                           |
| $\Delta$ wc1 | 12-day | 2632524 | up | GO:0005524 | 1,55E-05    | ATP binding                                                           |
| $\Delta$ wc1 | 12-day | 2638986 | up | GO:0005524 | 1,55E-05    | ATP binding                                                           |
| $\Delta$ wc1 | 12-day | 2641678 | up | GO:0005524 | 1,55E-05    | ATP binding                                                           |
| $\Delta$ wc1 | 12-day | 2645675 | up | GO:0005524 | 1,55E-05    | ATP binding                                                           |
| $\Delta$ wc1 | 12-day | 2661304 | up | GO:0005524 | 1,55E-05    | ATP binding                                                           |
| $\Delta$ wc1 | 12-day | 2662880 | up | GO:0005524 | 1,55E-05    | ATP binding                                                           |
| $\Delta$ wc1 | 12-day | 2672807 | up | GO:0005524 | 1,55E-05    | ATP binding                                                           |
| $\Delta$ wc1 | 12-day | 2675859 | up | GO:0005524 | 1,55E-05    | ATP binding                                                           |
| $\Delta$ wc1 | 12-day | 2682841 | up | GO:0005524 | 1,55E-05    | ATP binding                                                           |
| $\Delta$ wc1 | 12-day | 2684163 | up | GO:0005524 | 1,55E-05    | ATP binding                                                           |
| $\Delta$ wc1 | 12-day | 2684679 | up | GO:0005524 | 1,55E-05    | ATP binding                                                           |
| $\Delta$ wc1 | 12-day | 2693043 | up | GO:0005524 | 1,55E-05    | ATP binding                                                           |
| $\Delta$ wc1 | 12-day | 2693940 | up | GO:0005524 | 1,55E-05    | ATP binding                                                           |
| $\Delta$ wc1 | 12-day | 2702947 | up | GO:0005524 | 1,55E-05    | ATP binding                                                           |
| $\Delta$ wc1 | 12-day | 2725125 | up | GO:0005524 | 1,55E-05    | ATP binding                                                           |
| $\Delta$ wc1 | 12-day | 2737152 | up | GO:0005524 | 1,55E-05    | ATP binding                                                           |
| $\Delta$ wc1 | 12-day | 2498450 | up | GO:0016810 | 0,007678636 | hydrolase activity, acting on carbon-nitrogen (but not peptide) bonds |
| $\Delta$ wc1 | 12-day | 2554832 | up | GO:0016810 | 0,007678636 | hydrolase activity, acting on carbon-nitrogen (but not peptide) bonds |
| $\Delta$ wc1 | 12-day | 2641020 | up | GO:0016810 | 0,007678636 | hydrolase activity, acting on carbon-nitrogen (but not peptide) bonds |
| $\Delta$ wc1 | 12-day | 1136736 | up | GO:0005215 | 0,013523922 | transporter activity                                                  |
| $\Delta$ wc1 | 12-day | 1147635 | up | GO:0005215 | 0,013523922 | transporter activity                                                  |
| $\Delta$ wc1 | 12-day | 1196424 | up | GO:0005215 | 0,013523922 | transporter activity                                                  |

|      |        |         |    |            |             |                      |
|------|--------|---------|----|------------|-------------|----------------------|
| Δwc1 | 12-day | 1234296 | up | GO:0005215 | 0,013523922 | transporter activity |
| Δwc1 | 12-day | 2481323 | up | GO:0005215 | 0,013523922 | transporter activity |
| Δwc1 | 12-day | 2492230 | up | GO:0005215 | 0,013523922 | transporter activity |
| Δwc1 | 12-day | 2498026 | up | GO:0005215 | 0,013523922 | transporter activity |
| Δwc1 | 12-day | 2499364 | up | GO:0005215 | 0,013523922 | transporter activity |
| Δwc1 | 12-day | 2502284 | up | GO:0005215 | 0,013523922 | transporter activity |
| Δwc1 | 12-day | 2508421 | up | GO:0005215 | 0,013523922 | transporter activity |
| Δwc1 | 12-day | 2515031 | up | GO:0005215 | 0,013523922 | transporter activity |
| Δwc1 | 12-day | 2564524 | up | GO:0005215 | 0,013523922 | transporter activity |
| Δwc1 | 12-day | 2612313 | up | GO:0005215 | 0,013523922 | transporter activity |
| Δwc1 | 12-day | 2617636 | up | GO:0005215 | 0,013523922 | transporter activity |
| Δwc1 | 12-day | 2618842 | up | GO:0005215 | 0,013523922 | transporter activity |
| Δwc1 | 12-day | 2619010 | up | GO:0005215 | 0,013523922 | transporter activity |
| Δwc1 | 12-day | 2622931 | up | GO:0005215 | 0,013523922 | transporter activity |
| Δwc1 | 12-day | 2623043 | up | GO:0005215 | 0,013523922 | transporter activity |
| Δwc1 | 12-day | 2628098 | up | GO:0005215 | 0,013523922 | transporter activity |
| Δwc1 | 12-day | 2628982 | up | GO:0005215 | 0,013523922 | transporter activity |
| Δwc1 | 12-day | 2630257 | up | GO:0005215 | 0,013523922 | transporter activity |
| Δwc1 | 12-day | 2631348 | up | GO:0005215 | 0,013523922 | transporter activity |
| Δwc1 | 12-day | 2632105 | up | GO:0005215 | 0,013523922 | transporter activity |
| Δwc1 | 12-day | 2633206 | up | GO:0005215 | 0,013523922 | transporter activity |
| Δwc1 | 12-day | 2633212 | up | GO:0005215 | 0,013523922 | transporter activity |
| Δwc1 | 12-day | 2633596 | up | GO:0005215 | 0,013523922 | transporter activity |
| Δwc1 | 12-day | 2637652 | up | GO:0005215 | 0,013523922 | transporter activity |
| Δwc1 | 12-day | 2641095 | up | GO:0005215 | 0,013523922 | transporter activity |
| Δwc1 | 12-day | 2641735 | up | GO:0005215 | 0,013523922 | transporter activity |
| Δwc1 | 12-day | 2642894 | up | GO:0005215 | 0,013523922 | transporter activity |
| Δwc1 | 12-day | 2660764 | up | GO:0005215 | 0,013523922 | transporter activity |
| Δwc1 | 12-day | 2663452 | up | GO:0005215 | 0,013523922 | transporter activity |
| Δwc1 | 12-day | 2680674 | up | GO:0005215 | 0,013523922 | transporter activity |
| Δwc1 | 12-day | 2698170 | up | GO:0005215 | 0,013523922 | transporter activity |
| Δwc1 | 12-day | 2704067 | up | GO:0005215 | 0,013523922 | transporter activity |
| Δwc1 | 12-day | 13059   | up | GO:0006508 | 0,0227299   | proteolysis          |
| Δwc1 | 12-day | 54219   | up | GO:0006508 | 0,0227299   | proteolysis          |

|      |        |         |      |            |            |                          |
|------|--------|---------|------|------------|------------|--------------------------|
| Δwc1 | 12-day | 75642   | up   | GO:0006508 | 0,0227299  | proteolysis              |
| Δwc1 | 12-day | 1190859 | up   | GO:0006508 | 0,0227299  | proteolysis              |
| Δwc1 | 12-day | 2268565 | up   | GO:0006508 | 0,0227299  | proteolysis              |
| Δwc1 | 12-day | 2494345 | up   | GO:0006508 | 0,0227299  | proteolysis              |
| Δwc1 | 12-day | 2495551 | up   | GO:0006508 | 0,0227299  | proteolysis              |
| Δwc1 | 12-day | 2495563 | up   | GO:0006508 | 0,0227299  | proteolysis              |
| Δwc1 | 12-day | 2499350 | up   | GO:0006508 | 0,0227299  | proteolysis              |
| Δwc1 | 12-day | 2501086 | up   | GO:0006508 | 0,0227299  | proteolysis              |
| Δwc1 | 12-day | 2508594 | up   | GO:0006508 | 0,0227299  | proteolysis              |
| Δwc1 | 12-day | 2521109 | up   | GO:0006508 | 0,0227299  | proteolysis              |
| Δwc1 | 12-day | 2525660 | up   | GO:0006508 | 0,0227299  | proteolysis              |
| Δwc1 | 12-day | 2597093 | up   | GO:0006508 | 0,0227299  | proteolysis              |
| Δwc1 | 12-day | 2607695 | up   | GO:0006508 | 0,0227299  | proteolysis              |
| Δwc1 | 12-day | 2611979 | up   | GO:0006508 | 0,0227299  | proteolysis              |
| Δwc1 | 12-day | 2614398 | up   | GO:0006508 | 0,0227299  | proteolysis              |
| Δwc1 | 12-day | 2616091 | up   | GO:0006508 | 0,0227299  | proteolysis              |
| Δwc1 | 12-day | 2625721 | up   | GO:0006508 | 0,0227299  | proteolysis              |
| Δwc1 | 12-day | 2627176 | up   | GO:0006508 | 0,0227299  | proteolysis              |
| Δwc1 | 12-day | 2632766 | up   | GO:0006508 | 0,0227299  | proteolysis              |
| Δwc1 | 12-day | 2635416 | up   | GO:0006508 | 0,0227299  | proteolysis              |
| Δwc1 | 12-day | 2638986 | up   | GO:0006508 | 0,0227299  | proteolysis              |
| Δwc1 | 12-day | 2639300 | up   | GO:0006508 | 0,0227299  | proteolysis              |
| Δwc1 | 12-day | 2668049 | up   | GO:0006508 | 0,0227299  | proteolysis              |
| Δwc1 | 12-day | 2621806 | up   | GO:0006032 | 0,02741828 | chitin catabolic process |
| Δwc1 | 12-day | 2643740 | up   | GO:0006032 | 0,02741828 | chitin catabolic process |
| Δwc1 | 12-day | 2644666 | up   | GO:0006032 | 0,02741828 | chitin catabolic process |
| Δwc1 | 12-day | 2706622 | up   | GO:0006032 | 0,02741828 | chitin catabolic process |
| Δwc1 | 12-day | 1092260 | down | GO:0008152 | 1,56E-07   | metabolic process        |
| Δwc1 | 12-day | 1152293 | down | GO:0008152 | 1,56E-07   | metabolic process        |
| Δwc1 | 12-day | 1200798 | down | GO:0008152 | 1,56E-07   | metabolic process        |
| Δwc1 | 12-day | 2135332 | down | GO:0008152 | 1,56E-07   | metabolic process        |
| Δwc1 | 12-day | 2161304 | down | GO:0008152 | 1,56E-07   | metabolic process        |
| Δwc1 | 12-day | 2194185 | down | GO:0008152 | 1,56E-07   | metabolic process        |
| Δwc1 | 12-day | 2255031 | down | GO:0008152 | 1,56E-07   | metabolic process        |

|      |        |         |      |            |          |                   |
|------|--------|---------|------|------------|----------|-------------------|
| Δwc1 | 12-day | 2333133 | down | GO:0008152 | 1,56E-07 | metabolic process |
| Δwc1 | 12-day | 2492878 | down | GO:0008152 | 1,56E-07 | metabolic process |
| Δwc1 | 12-day | 2495032 | down | GO:0008152 | 1,56E-07 | metabolic process |
| Δwc1 | 12-day | 2507164 | down | GO:0008152 | 1,56E-07 | metabolic process |
| Δwc1 | 12-day | 2553610 | down | GO:0008152 | 1,56E-07 | metabolic process |
| Δwc1 | 12-day | 2577440 | down | GO:0008152 | 1,56E-07 | metabolic process |
| Δwc1 | 12-day | 2579143 | down | GO:0008152 | 1,56E-07 | metabolic process |
| Δwc1 | 12-day | 2604917 | down | GO:0008152 | 1,56E-07 | metabolic process |
| Δwc1 | 12-day | 2606988 | down | GO:0008152 | 1,56E-07 | metabolic process |
| Δwc1 | 12-day | 2607837 | down | GO:0008152 | 1,56E-07 | metabolic process |
| Δwc1 | 12-day | 2608048 | down | GO:0008152 | 1,56E-07 | metabolic process |
| Δwc1 | 12-day | 2609150 | down | GO:0008152 | 1,56E-07 | metabolic process |
| Δwc1 | 12-day | 2610372 | down | GO:0008152 | 1,56E-07 | metabolic process |
| Δwc1 | 12-day | 2610587 | down | GO:0008152 | 1,56E-07 | metabolic process |
| Δwc1 | 12-day | 2611868 | down | GO:0008152 | 1,56E-07 | metabolic process |
| Δwc1 | 12-day | 2615598 | down | GO:0008152 | 1,56E-07 | metabolic process |
| Δwc1 | 12-day | 2616880 | down | GO:0008152 | 1,56E-07 | metabolic process |
| Δwc1 | 12-day | 2616916 | down | GO:0008152 | 1,56E-07 | metabolic process |
| Δwc1 | 12-day | 2618904 | down | GO:0008152 | 1,56E-07 | metabolic process |
| Δwc1 | 12-day | 2619714 | down | GO:0008152 | 1,56E-07 | metabolic process |
| Δwc1 | 12-day | 2619840 | down | GO:0008152 | 1,56E-07 | metabolic process |
| Δwc1 | 12-day | 2621873 | down | GO:0008152 | 1,56E-07 | metabolic process |
| Δwc1 | 12-day | 2622287 | down | GO:0008152 | 1,56E-07 | metabolic process |
| Δwc1 | 12-day | 2623301 | down | GO:0008152 | 1,56E-07 | metabolic process |
| Δwc1 | 12-day | 2623956 | down | GO:0008152 | 1,56E-07 | metabolic process |
| Δwc1 | 12-day | 2624525 | down | GO:0008152 | 1,56E-07 | metabolic process |
| Δwc1 | 12-day | 2624675 | down | GO:0008152 | 1,56E-07 | metabolic process |
| Δwc1 | 12-day | 2625561 | down | GO:0008152 | 1,56E-07 | metabolic process |
| Δwc1 | 12-day | 2625782 | down | GO:0008152 | 1,56E-07 | metabolic process |
| Δwc1 | 12-day | 2626510 | down | GO:0008152 | 1,56E-07 | metabolic process |
| Δwc1 | 12-day | 2627172 | down | GO:0008152 | 1,56E-07 | metabolic process |
| Δwc1 | 12-day | 2627304 | down | GO:0008152 | 1,56E-07 | metabolic process |
| Δwc1 | 12-day | 2629850 | down | GO:0008152 | 1,56E-07 | metabolic process |
| Δwc1 | 12-day | 2631112 | down | GO:0008152 | 1,56E-07 | metabolic process |

|      |        |         |      |            |          |                         |
|------|--------|---------|------|------------|----------|-------------------------|
| Δwc1 | 12-day | 2631237 | down | GO:0008152 | 1,56E-07 | metabolic process       |
| Δwc1 | 12-day | 2631774 | down | GO:0008152 | 1,56E-07 | metabolic process       |
| Δwc1 | 12-day | 2632206 | down | GO:0008152 | 1,56E-07 | metabolic process       |
| Δwc1 | 12-day | 2632253 | down | GO:0008152 | 1,56E-07 | metabolic process       |
| Δwc1 | 12-day | 2632611 | down | GO:0008152 | 1,56E-07 | metabolic process       |
| Δwc1 | 12-day | 2633167 | down | GO:0008152 | 1,56E-07 | metabolic process       |
| Δwc1 | 12-day | 2633632 | down | GO:0008152 | 1,56E-07 | metabolic process       |
| Δwc1 | 12-day | 2636100 | down | GO:0008152 | 1,56E-07 | metabolic process       |
| Δwc1 | 12-day | 2637104 | down | GO:0008152 | 1,56E-07 | metabolic process       |
| Δwc1 | 12-day | 2637643 | down | GO:0008152 | 1,56E-07 | metabolic process       |
| Δwc1 | 12-day | 2637755 | down | GO:0008152 | 1,56E-07 | metabolic process       |
| Δwc1 | 12-day | 2638484 | down | GO:0008152 | 1,56E-07 | metabolic process       |
| Δwc1 | 12-day | 2638921 | down | GO:0008152 | 1,56E-07 | metabolic process       |
| Δwc1 | 12-day | 2640472 | down | GO:0008152 | 1,56E-07 | metabolic process       |
| Δwc1 | 12-day | 2640484 | down | GO:0008152 | 1,56E-07 | metabolic process       |
| Δwc1 | 12-day | 2640992 | down | GO:0008152 | 1,56E-07 | metabolic process       |
| Δwc1 | 12-day | 2641506 | down | GO:0008152 | 1,56E-07 | metabolic process       |
| Δwc1 | 12-day | 2641520 | down | GO:0008152 | 1,56E-07 | metabolic process       |
| Δwc1 | 12-day | 2643650 | down | GO:0008152 | 1,56E-07 | metabolic process       |
| Δwc1 | 12-day | 2643891 | down | GO:0008152 | 1,56E-07 | metabolic process       |
| Δwc1 | 12-day | 2644127 | down | GO:0008152 | 1,56E-07 | metabolic process       |
| Δwc1 | 12-day | 2644281 | down | GO:0008152 | 1,56E-07 | metabolic process       |
| Δwc1 | 12-day | 2644330 | down | GO:0008152 | 1,56E-07 | metabolic process       |
| Δwc1 | 12-day | 2644430 | down | GO:0008152 | 1,56E-07 | metabolic process       |
| Δwc1 | 12-day | 2645207 | down | GO:0008152 | 1,56E-07 | metabolic process       |
| Δwc1 | 12-day | 2645668 | down | GO:0008152 | 1,56E-07 | metabolic process       |
| Δwc1 | 12-day | 2660684 | down | GO:0008152 | 1,56E-07 | metabolic process       |
| Δwc1 | 12-day | 2665516 | down | GO:0008152 | 1,56E-07 | metabolic process       |
| Δwc1 | 12-day | 2705421 | down | GO:0008152 | 1,56E-07 | metabolic process       |
| Δwc1 | 12-day | 2711060 | down | GO:0008152 | 1,56E-07 | metabolic process       |
| Δwc1 | 12-day | 2726410 | down | GO:0008152 | 1,56E-07 | metabolic process       |
| Δwc1 | 12-day | 2728826 | down | GO:0008152 | 1,56E-07 | metabolic process       |
| Δwc1 | 12-day | 237513  | down | GO:0016491 | 3,08E-07 | oxidoreductase activity |
| Δwc1 | 12-day | 1038608 | down | GO:0016491 | 3,08E-07 | oxidoreductase activity |



|      |        |         |      |            |          |                         |
|------|--------|---------|------|------------|----------|-------------------------|
| Δwc1 | 12-day | 1152293 | down | GO:0016491 | 3,08E-07 | oxidoreductase activity |
| Δwc1 | 12-day | 2255031 | down | GO:0016491 | 3,08E-07 | oxidoreductase activity |
| Δwc1 | 12-day | 2312801 | down | GO:0016491 | 3,08E-07 | oxidoreductase activity |
| Δwc1 | 12-day | 2333133 | down | GO:0016491 | 3,08E-07 | oxidoreductase activity |
| Δwc1 | 12-day | 2376858 | down | GO:0016491 | 3,08E-07 | oxidoreductase activity |
| Δwc1 | 12-day | 2490518 | down | GO:0016491 | 3,08E-07 | oxidoreductase activity |
| Δwc1 | 12-day | 2497674 | down | GO:0016491 | 3,08E-07 | oxidoreductase activity |
| Δwc1 | 12-day | 2503108 | down | GO:0016491 | 3,08E-07 | oxidoreductase activity |
| Δwc1 | 12-day | 2507164 | down | GO:0016491 | 3,08E-07 | oxidoreductase activity |
| Δwc1 | 12-day | 2515964 | down | GO:0016491 | 3,08E-07 | oxidoreductase activity |
| Δwc1 | 12-day | 2516444 | down | GO:0016491 | 3,08E-07 | oxidoreductase activity |
| Δwc1 | 12-day | 2532967 | down | GO:0016491 | 3,08E-07 | oxidoreductase activity |
| Δwc1 | 12-day | 2543454 | down | GO:0016491 | 3,08E-07 | oxidoreductase activity |
| Δwc1 | 12-day | 2571870 | down | GO:0016491 | 3,08E-07 | oxidoreductase activity |
| Δwc1 | 12-day | 2606988 | down | GO:0016491 | 3,08E-07 | oxidoreductase activity |
| Δwc1 | 12-day | 2608048 | down | GO:0016491 | 3,08E-07 | oxidoreductase activity |
| Δwc1 | 12-day | 2609840 | down | GO:0016491 | 3,08E-07 | oxidoreductase activity |
| Δwc1 | 12-day | 2610372 | down | GO:0016491 | 3,08E-07 | oxidoreductase activity |
| Δwc1 | 12-day | 2610587 | down | GO:0016491 | 3,08E-07 | oxidoreductase activity |
| Δwc1 | 12-day | 2611538 | down | GO:0016491 | 3,08E-07 | oxidoreductase activity |
| Δwc1 | 12-day | 2611868 | down | GO:0016491 | 3,08E-07 | oxidoreductase activity |
| Δwc1 | 12-day | 2615160 | down | GO:0016491 | 3,08E-07 | oxidoreductase activity |
| Δwc1 | 12-day | 2616880 | down | GO:0016491 | 3,08E-07 | oxidoreductase activity |
| Δwc1 | 12-day | 2616916 | down | GO:0016491 | 3,08E-07 | oxidoreductase activity |
| Δwc1 | 12-day | 2619840 | down | GO:0016491 | 3,08E-07 | oxidoreductase activity |
| Δwc1 | 12-day | 2621873 | down | GO:0016491 | 3,08E-07 | oxidoreductase activity |
| Δwc1 | 12-day | 2623301 | down | GO:0016491 | 3,08E-07 | oxidoreductase activity |
| Δwc1 | 12-day | 2625561 | down | GO:0016491 | 3,08E-07 | oxidoreductase activity |
| Δwc1 | 12-day | 2625917 | down | GO:0016491 | 3,08E-07 | oxidoreductase activity |
| Δwc1 | 12-day | 2627304 | down | GO:0016491 | 3,08E-07 | oxidoreductase activity |
| Δwc1 | 12-day | 2629850 | down | GO:0016491 | 3,08E-07 | oxidoreductase activity |
| Δwc1 | 12-day | 2630637 | down | GO:0016491 | 3,08E-07 | oxidoreductase activity |
| Δwc1 | 12-day | 2631774 | down | GO:0016491 | 3,08E-07 | oxidoreductase activity |
| Δwc1 | 12-day | 2633167 | down | GO:0016491 | 3,08E-07 | oxidoreductase activity |

|      |        |         |      |            |          |                         |
|------|--------|---------|------|------------|----------|-------------------------|
| Δwc1 | 12-day | 2633632 | down | GO:0016491 | 3,08E-07 | oxidoreductase activity |
| Δwc1 | 12-day | 2636160 | down | GO:0016491 | 3,08E-07 | oxidoreductase activity |
| Δwc1 | 12-day | 2637104 | down | GO:0016491 | 3,08E-07 | oxidoreductase activity |
| Δwc1 | 12-day | 2637755 | down | GO:0016491 | 3,08E-07 | oxidoreductase activity |
| Δwc1 | 12-day | 2638484 | down | GO:0016491 | 3,08E-07 | oxidoreductase activity |
| Δwc1 | 12-day | 2639682 | down | GO:0016491 | 3,08E-07 | oxidoreductase activity |
| Δwc1 | 12-day | 2641368 | down | GO:0016491 | 3,08E-07 | oxidoreductase activity |
| Δwc1 | 12-day | 2641506 | down | GO:0016491 | 3,08E-07 | oxidoreductase activity |
| Δwc1 | 12-day | 2641520 | down | GO:0016491 | 3,08E-07 | oxidoreductase activity |
| Δwc1 | 12-day | 2643891 | down | GO:0016491 | 3,08E-07 | oxidoreductase activity |
| Δwc1 | 12-day | 2644127 | down | GO:0016491 | 3,08E-07 | oxidoreductase activity |
| Δwc1 | 12-day | 2644330 | down | GO:0016491 | 3,08E-07 | oxidoreductase activity |
| Δwc1 | 12-day | 2644430 | down | GO:0016491 | 3,08E-07 | oxidoreductase activity |
| Δwc1 | 12-day | 2661224 | down | GO:0016491 | 3,08E-07 | oxidoreductase activity |
| Δwc1 | 12-day | 2671376 | down | GO:0016491 | 3,08E-07 | oxidoreductase activity |
| Δwc1 | 12-day | 2688172 | down | GO:0016491 | 3,08E-07 | oxidoreductase activity |
| Δwc1 | 12-day | 2697968 | down | GO:0016491 | 3,08E-07 | oxidoreductase activity |
| Δwc1 | 12-day | 2705421 | down | GO:0016491 | 3,08E-07 | oxidoreductase activity |
| Δwc1 | 12-day | 2630193 | down | GO:0000786 | 9,56E-07 | nucleosome              |
| Δwc1 | 12-day | 2630193 | down | GO:0006334 | 3,60E-06 | nucleosome assembly     |
| Δwc1 | 12-day | 85278   | down | GO:0003824 | 3,60E-06 | catalytic activity      |
| Δwc1 | 12-day | 237513  | down | GO:0003824 | 3,60E-06 | catalytic activity      |
| Δwc1 | 12-day | 1092260 | down | GO:0003824 | 3,60E-06 | catalytic activity      |
| Δwc1 | 12-day | 1152293 | down | GO:0003824 | 3,60E-06 | catalytic activity      |
| Δwc1 | 12-day | 1184723 | down | GO:0003824 | 3,60E-06 | catalytic activity      |
| Δwc1 | 12-day | 1185226 | down | GO:0003824 | 3,60E-06 | catalytic activity      |
| Δwc1 | 12-day | 1191999 | down | GO:0003824 | 3,60E-06 | catalytic activity      |
| Δwc1 | 12-day | 1200798 | down | GO:0003824 | 3,60E-06 | catalytic activity      |
| Δwc1 | 12-day | 2135332 | down | GO:0003824 | 3,60E-06 | catalytic activity      |
| Δwc1 | 12-day | 2161304 | down | GO:0003824 | 3,60E-06 | catalytic activity      |
| Δwc1 | 12-day | 2194185 | down | GO:0003824 | 3,60E-06 | catalytic activity      |
| Δwc1 | 12-day | 2255031 | down | GO:0003824 | 3,60E-06 | catalytic activity      |
| Δwc1 | 12-day | 2333133 | down | GO:0003824 | 3,60E-06 | catalytic activity      |
| Δwc1 | 12-day | 2368049 | down | GO:0003824 | 3,60E-06 | catalytic activity      |

|      |        |         |      |            |          |                    |
|------|--------|---------|------|------------|----------|--------------------|
| Δwc1 | 12-day | 2492878 | down | GO:0003824 | 3,60E-06 | catalytic activity |
| Δwc1 | 12-day | 2495032 | down | GO:0003824 | 3,60E-06 | catalytic activity |
| Δwc1 | 12-day | 2516444 | down | GO:0003824 | 3,60E-06 | catalytic activity |
| Δwc1 | 12-day | 2598960 | down | GO:0003824 | 3,60E-06 | catalytic activity |
| Δwc1 | 12-day | 2605122 | down | GO:0003824 | 3,60E-06 | catalytic activity |
| Δwc1 | 12-day | 2606988 | down | GO:0003824 | 3,60E-06 | catalytic activity |
| Δwc1 | 12-day | 2607034 | down | GO:0003824 | 3,60E-06 | catalytic activity |
| Δwc1 | 12-day | 2607837 | down | GO:0003824 | 3,60E-06 | catalytic activity |
| Δwc1 | 12-day | 2608048 | down | GO:0003824 | 3,60E-06 | catalytic activity |
| Δwc1 | 12-day | 2610372 | down | GO:0003824 | 3,60E-06 | catalytic activity |
| Δwc1 | 12-day | 2610587 | down | GO:0003824 | 3,60E-06 | catalytic activity |
| Δwc1 | 12-day | 2615598 | down | GO:0003824 | 3,60E-06 | catalytic activity |
| Δwc1 | 12-day | 2616491 | down | GO:0003824 | 3,60E-06 | catalytic activity |
| Δwc1 | 12-day | 2616880 | down | GO:0003824 | 3,60E-06 | catalytic activity |
| Δwc1 | 12-day | 2616916 | down | GO:0003824 | 3,60E-06 | catalytic activity |
| Δwc1 | 12-day | 2617562 | down | GO:0003824 | 3,60E-06 | catalytic activity |
| Δwc1 | 12-day | 2618252 | down | GO:0003824 | 3,60E-06 | catalytic activity |
| Δwc1 | 12-day | 2618425 | down | GO:0003824 | 3,60E-06 | catalytic activity |
| Δwc1 | 12-day | 2618479 | down | GO:0003824 | 3,60E-06 | catalytic activity |
| Δwc1 | 12-day | 2618904 | down | GO:0003824 | 3,60E-06 | catalytic activity |
| Δwc1 | 12-day | 2618997 | down | GO:0003824 | 3,60E-06 | catalytic activity |
| Δwc1 | 12-day | 2619714 | down | GO:0003824 | 3,60E-06 | catalytic activity |
| Δwc1 | 12-day | 2620388 | down | GO:0003824 | 3,60E-06 | catalytic activity |
| Δwc1 | 12-day | 2621873 | down | GO:0003824 | 3,60E-06 | catalytic activity |
| Δwc1 | 12-day | 2622287 | down | GO:0003824 | 3,60E-06 | catalytic activity |
| Δwc1 | 12-day | 2623301 | down | GO:0003824 | 3,60E-06 | catalytic activity |
| Δwc1 | 12-day | 2624675 | down | GO:0003824 | 3,60E-06 | catalytic activity |
| Δwc1 | 12-day | 2625561 | down | GO:0003824 | 3,60E-06 | catalytic activity |
| Δwc1 | 12-day | 2625782 | down | GO:0003824 | 3,60E-06 | catalytic activity |
| Δwc1 | 12-day | 2625818 | down | GO:0003824 | 3,60E-06 | catalytic activity |
| Δwc1 | 12-day | 2626510 | down | GO:0003824 | 3,60E-06 | catalytic activity |
| Δwc1 | 12-day | 2627304 | down | GO:0003824 | 3,60E-06 | catalytic activity |
| Δwc1 | 12-day | 2628678 | down | GO:0003824 | 3,60E-06 | catalytic activity |
| Δwc1 | 12-day | 2629850 | down | GO:0003824 | 3,60E-06 | catalytic activity |

|      |        |         |      |            |          |                    |
|------|--------|---------|------|------------|----------|--------------------|
| Δwc1 | 12-day | 2630634 | down | GO:0003824 | 3,60E-06 | catalytic activity |
| Δwc1 | 12-day | 2631112 | down | GO:0003824 | 3,60E-06 | catalytic activity |
| Δwc1 | 12-day | 2631237 | down | GO:0003824 | 3,60E-06 | catalytic activity |
| Δwc1 | 12-day | 2632206 | down | GO:0003824 | 3,60E-06 | catalytic activity |
| Δwc1 | 12-day | 2632253 | down | GO:0003824 | 3,60E-06 | catalytic activity |
| Δwc1 | 12-day | 2632611 | down | GO:0003824 | 3,60E-06 | catalytic activity |
| Δwc1 | 12-day | 2633144 | down | GO:0003824 | 3,60E-06 | catalytic activity |
| Δwc1 | 12-day | 2633162 | down | GO:0003824 | 3,60E-06 | catalytic activity |
| Δwc1 | 12-day | 2633167 | down | GO:0003824 | 3,60E-06 | catalytic activity |
| Δwc1 | 12-day | 2633632 | down | GO:0003824 | 3,60E-06 | catalytic activity |
| Δwc1 | 12-day | 2634918 | down | GO:0003824 | 3,60E-06 | catalytic activity |
| Δwc1 | 12-day | 2635216 | down | GO:0003824 | 3,60E-06 | catalytic activity |
| Δwc1 | 12-day | 2635219 | down | GO:0003824 | 3,60E-06 | catalytic activity |
| Δwc1 | 12-day | 2637104 | down | GO:0003824 | 3,60E-06 | catalytic activity |
| Δwc1 | 12-day | 2638484 | down | GO:0003824 | 3,60E-06 | catalytic activity |
| Δwc1 | 12-day | 2638783 | down | GO:0003824 | 3,60E-06 | catalytic activity |
| Δwc1 | 12-day | 2640484 | down | GO:0003824 | 3,60E-06 | catalytic activity |
| Δwc1 | 12-day | 2640992 | down | GO:0003824 | 3,60E-06 | catalytic activity |
| Δwc1 | 12-day | 2641022 | down | GO:0003824 | 3,60E-06 | catalytic activity |
| Δwc1 | 12-day | 2641506 | down | GO:0003824 | 3,60E-06 | catalytic activity |
| Δwc1 | 12-day | 2641520 | down | GO:0003824 | 3,60E-06 | catalytic activity |
| Δwc1 | 12-day | 2642275 | down | GO:0003824 | 3,60E-06 | catalytic activity |
| Δwc1 | 12-day | 2643650 | down | GO:0003824 | 3,60E-06 | catalytic activity |
| Δwc1 | 12-day | 2643891 | down | GO:0003824 | 3,60E-06 | catalytic activity |
| Δwc1 | 12-day | 2643902 | down | GO:0003824 | 3,60E-06 | catalytic activity |
| Δwc1 | 12-day | 2644281 | down | GO:0003824 | 3,60E-06 | catalytic activity |
| Δwc1 | 12-day | 2644330 | down | GO:0003824 | 3,60E-06 | catalytic activity |
| Δwc1 | 12-day | 2645207 | down | GO:0003824 | 3,60E-06 | catalytic activity |
| Δwc1 | 12-day | 2645530 | down | GO:0003824 | 3,60E-06 | catalytic activity |
| Δwc1 | 12-day | 2645668 | down | GO:0003824 | 3,60E-06 | catalytic activity |
| Δwc1 | 12-day | 2660684 | down | GO:0003824 | 3,60E-06 | catalytic activity |
| Δwc1 | 12-day | 2688172 | down | GO:0003824 | 3,60E-06 | catalytic activity |
| Δwc1 | 12-day | 2699217 | down | GO:0003824 | 3,60E-06 | catalytic activity |
| Δwc1 | 12-day | 2705421 | down | GO:0003824 | 3,60E-06 | catalytic activity |

|      |        |         |      |            |          |                    |
|------|--------|---------|------|------------|----------|--------------------|
| Δwc1 | 12-day | 2711060 | down | GO:0003824 | 3,60E-06 | catalytic activity |
| Δwc1 | 12-day | 1153136 | down | GO:0006810 | 9,12E-06 | transport          |
| Δwc1 | 12-day | 1154281 | down | GO:0006810 | 9,12E-06 | transport          |
| Δwc1 | 12-day | 1267603 | down | GO:0006810 | 9,12E-06 | transport          |
| Δwc1 | 12-day | 1357952 | down | GO:0006810 | 9,12E-06 | transport          |
| Δwc1 | 12-day | 2138287 | down | GO:0006810 | 9,12E-06 | transport          |
| Δwc1 | 12-day | 2283957 | down | GO:0006810 | 9,12E-06 | transport          |
| Δwc1 | 12-day | 2481653 | down | GO:0006810 | 9,12E-06 | transport          |
| Δwc1 | 12-day | 2492878 | down | GO:0006810 | 9,12E-06 | transport          |
| Δwc1 | 12-day | 2494144 | down | GO:0006810 | 9,12E-06 | transport          |
| Δwc1 | 12-day | 2494727 | down | GO:0006810 | 9,12E-06 | transport          |
| Δwc1 | 12-day | 2514012 | down | GO:0006810 | 9,12E-06 | transport          |
| Δwc1 | 12-day | 2516374 | down | GO:0006810 | 9,12E-06 | transport          |
| Δwc1 | 12-day | 2520877 | down | GO:0006810 | 9,12E-06 | transport          |
| Δwc1 | 12-day | 2525305 | down | GO:0006810 | 9,12E-06 | transport          |
| Δwc1 | 12-day | 2576922 | down | GO:0006810 | 9,12E-06 | transport          |
| Δwc1 | 12-day | 2607025 | down | GO:0006810 | 9,12E-06 | transport          |
| Δwc1 | 12-day | 2607891 | down | GO:0006810 | 9,12E-06 | transport          |
| Δwc1 | 12-day | 2608678 | down | GO:0006810 | 9,12E-06 | transport          |
| Δwc1 | 12-day | 2609987 | down | GO:0006810 | 9,12E-06 | transport          |
| Δwc1 | 12-day | 2612806 | down | GO:0006810 | 9,12E-06 | transport          |
| Δwc1 | 12-day | 2613255 | down | GO:0006810 | 9,12E-06 | transport          |
| Δwc1 | 12-day | 2619645 | down | GO:0006810 | 9,12E-06 | transport          |
| Δwc1 | 12-day | 2620178 | down | GO:0006810 | 9,12E-06 | transport          |
| Δwc1 | 12-day | 2621828 | down | GO:0006810 | 9,12E-06 | transport          |
| Δwc1 | 12-day | 2623420 | down | GO:0006810 | 9,12E-06 | transport          |
| Δwc1 | 12-day | 2623492 | down | GO:0006810 | 9,12E-06 | transport          |
| Δwc1 | 12-day | 2626803 | down | GO:0006810 | 9,12E-06 | transport          |
| Δwc1 | 12-day | 2627703 | down | GO:0006810 | 9,12E-06 | transport          |
| Δwc1 | 12-day | 2628751 | down | GO:0006810 | 9,12E-06 | transport          |
| Δwc1 | 12-day | 2629091 | down | GO:0006810 | 9,12E-06 | transport          |
| Δwc1 | 12-day | 2629455 | down | GO:0006810 | 9,12E-06 | transport          |
| Δwc1 | 12-day | 2634793 | down | GO:0006810 | 9,12E-06 | transport          |
| Δwc1 | 12-day | 2636597 | down | GO:0006810 | 9,12E-06 | transport          |

|      |        |         |      |            |             |           |
|------|--------|---------|------|------------|-------------|-----------|
| Δwc1 | 12-day | 2637190 | down | GO:0006810 | 9,12E-06    | transport |
| Δwc1 | 12-day | 2637509 | down | GO:0006810 | 9,12E-06    | transport |
| Δwc1 | 12-day | 2642018 | down | GO:0006810 | 9,12E-06    | transport |
| Δwc1 | 12-day | 2645850 | down | GO:0006810 | 9,12E-06    | transport |
| Δwc1 | 12-day | 2661224 | down | GO:0006810 | 9,12E-06    | transport |
| Δwc1 | 12-day | 2662585 | down | GO:0006810 | 9,12E-06    | transport |
| Δwc1 | 12-day | 2701571 | down | GO:0006810 | 9,12E-06    | transport |
| Δwc1 | 12-day | 2712060 | down | GO:0006810 | 9,12E-06    | transport |
| Δwc1 | 12-day | 1038608 | down | GO:0016020 | 0,000202401 | membrane  |
| Δwc1 | 12-day | 1153136 | down | GO:0016020 | 0,000202401 | membrane  |
| Δwc1 | 12-day | 1176319 | down | GO:0016020 | 0,000202401 | membrane  |
| Δwc1 | 12-day | 1267603 | down | GO:0016020 | 0,000202401 | membrane  |
| Δwc1 | 12-day | 2138287 | down | GO:0016020 | 0,000202401 | membrane  |
| Δwc1 | 12-day | 2234784 | down | GO:0016020 | 0,000202401 | membrane  |
| Δwc1 | 12-day | 2283957 | down | GO:0016020 | 0,000202401 | membrane  |
| Δwc1 | 12-day | 2376858 | down | GO:0016020 | 0,000202401 | membrane  |
| Δwc1 | 12-day | 2494727 | down | GO:0016020 | 0,000202401 | membrane  |
| Δwc1 | 12-day | 2495286 | down | GO:0016020 | 0,000202401 | membrane  |
| Δwc1 | 12-day | 2514012 | down | GO:0016020 | 0,000202401 | membrane  |
| Δwc1 | 12-day | 2516374 | down | GO:0016020 | 0,000202401 | membrane  |
| Δwc1 | 12-day | 2525305 | down | GO:0016020 | 0,000202401 | membrane  |
| Δwc1 | 12-day | 2569923 | down | GO:0016020 | 0,000202401 | membrane  |
| Δwc1 | 12-day | 2600584 | down | GO:0016020 | 0,000202401 | membrane  |
| Δwc1 | 12-day | 2605277 | down | GO:0016020 | 0,000202401 | membrane  |
| Δwc1 | 12-day | 2609987 | down | GO:0016020 | 0,000202401 | membrane  |
| Δwc1 | 12-day | 2610450 | down | GO:0016020 | 0,000202401 | membrane  |
| Δwc1 | 12-day | 2612806 | down | GO:0016020 | 0,000202401 | membrane  |
| Δwc1 | 12-day | 2613255 | down | GO:0016020 | 0,000202401 | membrane  |
| Δwc1 | 12-day | 2618425 | down | GO:0016020 | 0,000202401 | membrane  |
| Δwc1 | 12-day | 2618479 | down | GO:0016020 | 0,000202401 | membrane  |
| Δwc1 | 12-day | 2618895 | down | GO:0016020 | 0,000202401 | membrane  |
| Δwc1 | 12-day | 2622024 | down | GO:0016020 | 0,000202401 | membrane  |
| Δwc1 | 12-day | 2622595 | down | GO:0016020 | 0,000202401 | membrane  |
| Δwc1 | 12-day | 2623420 | down | GO:0016020 | 0,000202401 | membrane  |

|      |        |         |      |            |             |                        |
|------|--------|---------|------|------------|-------------|------------------------|
| Δwc1 | 12-day | 2627703 | down | GO:0016020 | 0,000202401 | membrane               |
| Δwc1 | 12-day | 2629091 | down | GO:0016020 | 0,000202401 | membrane               |
| Δwc1 | 12-day | 2631182 | down | GO:0016020 | 0,000202401 | membrane               |
| Δwc1 | 12-day | 2636160 | down | GO:0016020 | 0,000202401 | membrane               |
| Δwc1 | 12-day | 2638261 | down | GO:0016020 | 0,000202401 | membrane               |
| Δwc1 | 12-day | 2639525 | down | GO:0016020 | 0,000202401 | membrane               |
| Δwc1 | 12-day | 2644280 | down | GO:0016020 | 0,000202401 | membrane               |
| Δwc1 | 12-day | 2645850 | down | GO:0016020 | 0,000202401 | membrane               |
| Δwc1 | 12-day | 2701571 | down | GO:0016020 | 0,000202401 | membrane               |
| Δwc1 | 12-day | 78628   | down | GO:0004497 | 0,000278598 | monooxygenase activity |
| Δwc1 | 12-day | 81631   | down | GO:0004497 | 0,000278598 | monooxygenase activity |
| Δwc1 | 12-day | 1131542 | down | GO:0004497 | 0,000278598 | monooxygenase activity |
| Δwc1 | 12-day | 1139445 | down | GO:0004497 | 0,000278598 | monooxygenase activity |
| Δwc1 | 12-day | 1188937 | down | GO:0004497 | 0,000278598 | monooxygenase activity |
| Δwc1 | 12-day | 1189794 | down | GO:0004497 | 0,000278598 | monooxygenase activity |
| Δwc1 | 12-day | 1193647 | down | GO:0004497 | 0,000278598 | monooxygenase activity |
| Δwc1 | 12-day | 2327903 | down | GO:0004497 | 0,000278598 | monooxygenase activity |
| Δwc1 | 12-day | 2484868 | down | GO:0004497 | 0,000278598 | monooxygenase activity |
| Δwc1 | 12-day | 2486680 | down | GO:0004497 | 0,000278598 | monooxygenase activity |
| Δwc1 | 12-day | 2510129 | down | GO:0004497 | 0,000278598 | monooxygenase activity |
| Δwc1 | 12-day | 2512276 | down | GO:0004497 | 0,000278598 | monooxygenase activity |
| Δwc1 | 12-day | 2583618 | down | GO:0004497 | 0,000278598 | monooxygenase activity |
| Δwc1 | 12-day | 2604096 | down | GO:0004497 | 0,000278598 | monooxygenase activity |
| Δwc1 | 12-day | 2604231 | down | GO:0004497 | 0,000278598 | monooxygenase activity |
| Δwc1 | 12-day | 2604458 | down | GO:0004497 | 0,000278598 | monooxygenase activity |
| Δwc1 | 12-day | 2604735 | down | GO:0004497 | 0,000278598 | monooxygenase activity |
| Δwc1 | 12-day | 2611234 | down | GO:0004497 | 0,000278598 | monooxygenase activity |
| Δwc1 | 12-day | 2616301 | down | GO:0004497 | 0,000278598 | monooxygenase activity |
| Δwc1 | 12-day | 2619674 | down | GO:0004497 | 0,000278598 | monooxygenase activity |
| Δwc1 | 12-day | 2619840 | down | GO:0004497 | 0,000278598 | monooxygenase activity |
| Δwc1 | 12-day | 2623115 | down | GO:0004497 | 0,000278598 | monooxygenase activity |
| Δwc1 | 12-day | 2623122 | down | GO:0004497 | 0,000278598 | monooxygenase activity |
| Δwc1 | 12-day | 2623196 | down | GO:0004497 | 0,000278598 | monooxygenase activity |
| Δwc1 | 12-day | 2628312 | down | GO:0004497 | 0,000278598 | monooxygenase activity |

|      |        |         |      |            |             |                        |
|------|--------|---------|------|------------|-------------|------------------------|
| Δwc1 | 12-day | 2628645 | down | GO:0004497 | 0,000278598 | monooxygenase activity |
| Δwc1 | 12-day | 2628651 | down | GO:0004497 | 0,000278598 | monooxygenase activity |
| Δwc1 | 12-day | 2629864 | down | GO:0004497 | 0,000278598 | monooxygenase activity |
| Δwc1 | 12-day | 2632925 | down | GO:0004497 | 0,000278598 | monooxygenase activity |
| Δwc1 | 12-day | 2634283 | down | GO:0004497 | 0,000278598 | monooxygenase activity |
| Δwc1 | 12-day | 2635487 | down | GO:0004497 | 0,000278598 | monooxygenase activity |
| Δwc1 | 12-day | 2635869 | down | GO:0004497 | 0,000278598 | monooxygenase activity |
| Δwc1 | 12-day | 2636544 | down | GO:0004497 | 0,000278598 | monooxygenase activity |
| Δwc1 | 12-day | 2638355 | down | GO:0004497 | 0,000278598 | monooxygenase activity |
| Δwc1 | 12-day | 2644430 | down | GO:0004497 | 0,000278598 | monooxygenase activity |
| Δwc1 | 12-day | 2668568 | down | GO:0004497 | 0,000278598 | monooxygenase activity |
| Δwc1 | 12-day | 2703628 | down | GO:0004497 | 0,000278598 | monooxygenase activity |
| Δwc1 | 12-day | 2703966 | down | GO:0004497 | 0,000278598 | monooxygenase activity |
| Δwc1 | 12-day | 2735179 | down | GO:0004497 | 0,000278598 | monooxygenase activity |
| Δwc1 | 12-day | 1036421 | down | GO:0016021 | 0,000325821 | integral to membrane   |
| Δwc1 | 12-day | 1038608 | down | GO:0016021 | 0,000325821 | integral to membrane   |
| Δwc1 | 12-day | 1153136 | down | GO:0016021 | 0,000325821 | integral to membrane   |
| Δwc1 | 12-day | 1154281 | down | GO:0016021 | 0,000325821 | integral to membrane   |
| Δwc1 | 12-day | 1172581 | down | GO:0016021 | 0,000325821 | integral to membrane   |
| Δwc1 | 12-day | 1186839 | down | GO:0016021 | 0,000325821 | integral to membrane   |
| Δwc1 | 12-day | 2138287 | down | GO:0016021 | 0,000325821 | integral to membrane   |
| Δwc1 | 12-day | 2283957 | down | GO:0016021 | 0,000325821 | integral to membrane   |
| Δwc1 | 12-day | 2481653 | down | GO:0016021 | 0,000325821 | integral to membrane   |
| Δwc1 | 12-day | 2494144 | down | GO:0016021 | 0,000325821 | integral to membrane   |
| Δwc1 | 12-day | 2503108 | down | GO:0016021 | 0,000325821 | integral to membrane   |
| Δwc1 | 12-day | 2514012 | down | GO:0016021 | 0,000325821 | integral to membrane   |
| Δwc1 | 12-day | 2516374 | down | GO:0016021 | 0,000325821 | integral to membrane   |
| Δwc1 | 12-day | 2524870 | down | GO:0016021 | 0,000325821 | integral to membrane   |
| Δwc1 | 12-day | 2525305 | down | GO:0016021 | 0,000325821 | integral to membrane   |
| Δwc1 | 12-day | 2572308 | down | GO:0016021 | 0,000325821 | integral to membrane   |
| Δwc1 | 12-day | 2602395 | down | GO:0016021 | 0,000325821 | integral to membrane   |
| Δwc1 | 12-day | 2604984 | down | GO:0016021 | 0,000325821 | integral to membrane   |
| Δwc1 | 12-day | 2607025 | down | GO:0016021 | 0,000325821 | integral to membrane   |
| Δwc1 | 12-day | 2607891 | down | GO:0016021 | 0,000325821 | integral to membrane   |



|      |        |         |      |            |             |                      |
|------|--------|---------|------|------------|-------------|----------------------|
| Δwc1 | 12-day | 2608678 | down | GO:0016021 | 0,000325821 | integral to membrane |
| Δwc1 | 12-day | 2611612 | down | GO:0016021 | 0,000325821 | integral to membrane |
| Δwc1 | 12-day | 2613255 | down | GO:0016021 | 0,000325821 | integral to membrane |
| Δwc1 | 12-day | 2619645 | down | GO:0016021 | 0,000325821 | integral to membrane |
| Δwc1 | 12-day | 2620178 | down | GO:0016021 | 0,000325821 | integral to membrane |
| Δwc1 | 12-day | 2621828 | down | GO:0016021 | 0,000325821 | integral to membrane |
| Δwc1 | 12-day | 2623420 | down | GO:0016021 | 0,000325821 | integral to membrane |
| Δwc1 | 12-day | 2623492 | down | GO:0016021 | 0,000325821 | integral to membrane |
| Δwc1 | 12-day | 2626803 | down | GO:0016021 | 0,000325821 | integral to membrane |
| Δwc1 | 12-day | 2627703 | down | GO:0016021 | 0,000325821 | integral to membrane |
| Δwc1 | 12-day | 2629091 | down | GO:0016021 | 0,000325821 | integral to membrane |
| Δwc1 | 12-day | 2629455 | down | GO:0016021 | 0,000325821 | integral to membrane |
| Δwc1 | 12-day | 2636597 | down | GO:0016021 | 0,000325821 | integral to membrane |
| Δwc1 | 12-day | 2637190 | down | GO:0016021 | 0,000325821 | integral to membrane |
| Δwc1 | 12-day | 2637509 | down | GO:0016021 | 0,000325821 | integral to membrane |
| Δwc1 | 12-day | 2638261 | down | GO:0016021 | 0,000325821 | integral to membrane |
| Δwc1 | 12-day | 2642018 | down | GO:0016021 | 0,000325821 | integral to membrane |
| Δwc1 | 12-day | 2667661 | down | GO:0016021 | 0,000325821 | integral to membrane |
| Δwc1 | 12-day | 2686473 | down | GO:0016021 | 0,000325821 | integral to membrane |
| Δwc1 | 12-day | 2691538 | down | GO:0016021 | 0,000325821 | integral to membrane |
| Δwc1 | 12-day | 2701571 | down | GO:0016021 | 0,000325821 | integral to membrane |
| Δwc1 | 12-day | 2704867 | down | GO:0016021 | 0,000325821 | integral to membrane |
| Δwc1 | 12-day | 2712060 | down | GO:0016021 | 0,000325821 | integral to membrane |
| Δwc1 | 12-day | 78628   | down | GO:0006118 | 0,000581667 | electron transport   |
| Δwc1 | 12-day | 81631   | down | GO:0006118 | 0,000581667 | electron transport   |
| Δwc1 | 12-day | 1038608 | down | GO:0006118 | 0,000581667 | electron transport   |
| Δwc1 | 12-day | 1084300 | down | GO:0006118 | 0,000581667 | electron transport   |
| Δwc1 | 12-day | 1131542 | down | GO:0006118 | 0,000581667 | electron transport   |
| Δwc1 | 12-day | 1139445 | down | GO:0006118 | 0,000581667 | electron transport   |
| Δwc1 | 12-day | 1188937 | down | GO:0006118 | 0,000581667 | electron transport   |
| Δwc1 | 12-day | 1189794 | down | GO:0006118 | 0,000581667 | electron transport   |
| Δwc1 | 12-day | 1193647 | down | GO:0006118 | 0,000581667 | electron transport   |
| Δwc1 | 12-day | 2327903 | down | GO:0006118 | 0,000581667 | electron transport   |
| Δwc1 | 12-day | 2450442 | down | GO:0006118 | 0,000581667 | electron transport   |

|      |        |         |      |            |             |                    |
|------|--------|---------|------|------------|-------------|--------------------|
| Δwc1 | 12-day | 2484868 | down | GO:0006118 | 0,000581667 | electron transport |
| Δwc1 | 12-day | 2486680 | down | GO:0006118 | 0,000581667 | electron transport |
| Δwc1 | 12-day | 2490518 | down | GO:0006118 | 0,000581667 | electron transport |
| Δwc1 | 12-day | 2497674 | down | GO:0006118 | 0,000581667 | electron transport |
| Δwc1 | 12-day | 2503108 | down | GO:0006118 | 0,000581667 | electron transport |
| Δwc1 | 12-day | 2510129 | down | GO:0006118 | 0,000581667 | electron transport |
| Δwc1 | 12-day | 2512276 | down | GO:0006118 | 0,000581667 | electron transport |
| Δwc1 | 12-day | 2532967 | down | GO:0006118 | 0,000581667 | electron transport |
| Δwc1 | 12-day | 2571870 | down | GO:0006118 | 0,000581667 | electron transport |
| Δwc1 | 12-day | 2583618 | down | GO:0006118 | 0,000581667 | electron transport |
| Δwc1 | 12-day | 2604096 | down | GO:0006118 | 0,000581667 | electron transport |
| Δwc1 | 12-day | 2604231 | down | GO:0006118 | 0,000581667 | electron transport |
| Δwc1 | 12-day | 2604458 | down | GO:0006118 | 0,000581667 | electron transport |
| Δwc1 | 12-day | 2604628 | down | GO:0006118 | 0,000581667 | electron transport |
| Δwc1 | 12-day | 2604735 | down | GO:0006118 | 0,000581667 | electron transport |
| Δwc1 | 12-day | 2609840 | down | GO:0006118 | 0,000581667 | electron transport |
| Δwc1 | 12-day | 2611234 | down | GO:0006118 | 0,000581667 | electron transport |
| Δwc1 | 12-day | 2616301 | down | GO:0006118 | 0,000581667 | electron transport |
| Δwc1 | 12-day | 2619674 | down | GO:0006118 | 0,000581667 | electron transport |
| Δwc1 | 12-day | 2619840 | down | GO:0006118 | 0,000581667 | electron transport |
| Δwc1 | 12-day | 2621855 | down | GO:0006118 | 0,000581667 | electron transport |
| Δwc1 | 12-day | 2623115 | down | GO:0006118 | 0,000581667 | electron transport |
| Δwc1 | 12-day | 2623122 | down | GO:0006118 | 0,000581667 | electron transport |
| Δwc1 | 12-day | 2623196 | down | GO:0006118 | 0,000581667 | electron transport |
| Δwc1 | 12-day | 2625951 | down | GO:0006118 | 0,000581667 | electron transport |
| Δwc1 | 12-day | 2628312 | down | GO:0006118 | 0,000581667 | electron transport |
| Δwc1 | 12-day | 2628645 | down | GO:0006118 | 0,000581667 | electron transport |
| Δwc1 | 12-day | 2628651 | down | GO:0006118 | 0,000581667 | electron transport |
| Δwc1 | 12-day | 2629850 | down | GO:0006118 | 0,000581667 | electron transport |
| Δwc1 | 12-day | 2629864 | down | GO:0006118 | 0,000581667 | electron transport |
| Δwc1 | 12-day | 2632925 | down | GO:0006118 | 0,000581667 | electron transport |
| Δwc1 | 12-day | 2633167 | down | GO:0006118 | 0,000581667 | electron transport |
| Δwc1 | 12-day | 2634283 | down | GO:0006118 | 0,000581667 | electron transport |
| Δwc1 | 12-day | 2635487 | down | GO:0006118 | 0,000581667 | electron transport |

|      |        |         |      |            |             |                      |
|------|--------|---------|------|------------|-------------|----------------------|
| Δwc1 | 12-day | 2635869 | down | GO:0006118 | 0,000581667 | electron transport   |
| Δwc1 | 12-day | 2636544 | down | GO:0006118 | 0,000581667 | electron transport   |
| Δwc1 | 12-day | 2637104 | down | GO:0006118 | 0,000581667 | electron transport   |
| Δwc1 | 12-day | 2637190 | down | GO:0006118 | 0,000581667 | electron transport   |
| Δwc1 | 12-day | 2638355 | down | GO:0006118 | 0,000581667 | electron transport   |
| Δwc1 | 12-day | 2639682 | down | GO:0006118 | 0,000581667 | electron transport   |
| Δwc1 | 12-day | 2644430 | down | GO:0006118 | 0,000581667 | electron transport   |
| Δwc1 | 12-day | 2662585 | down | GO:0006118 | 0,000581667 | electron transport   |
| Δwc1 | 12-day | 2668568 | down | GO:0006118 | 0,000581667 | electron transport   |
| Δwc1 | 12-day | 2671376 | down | GO:0006118 | 0,000581667 | electron transport   |
| Δwc1 | 12-day | 2703628 | down | GO:0006118 | 0,000581667 | electron transport   |
| Δwc1 | 12-day | 2703966 | down | GO:0006118 | 0,000581667 | electron transport   |
| Δwc1 | 12-day | 2735179 | down | GO:0006118 | 0,000581667 | electron transport   |
| Δwc1 | 12-day | 1153136 | down | GO:0005215 | 0,004404998 | transporter activity |
| Δwc1 | 12-day | 1154281 | down | GO:0005215 | 0,004404998 | transporter activity |
| Δwc1 | 12-day | 1357952 | down | GO:0005215 | 0,004404998 | transporter activity |
| Δwc1 | 12-day | 2138287 | down | GO:0005215 | 0,004404998 | transporter activity |
| Δwc1 | 12-day | 2283957 | down | GO:0005215 | 0,004404998 | transporter activity |
| Δwc1 | 12-day | 2481653 | down | GO:0005215 | 0,004404998 | transporter activity |
| Δwc1 | 12-day | 2492878 | down | GO:0005215 | 0,004404998 | transporter activity |
| Δwc1 | 12-day | 2494144 | down | GO:0005215 | 0,004404998 | transporter activity |
| Δwc1 | 12-day | 2516374 | down | GO:0005215 | 0,004404998 | transporter activity |
| Δwc1 | 12-day | 2520877 | down | GO:0005215 | 0,004404998 | transporter activity |
| Δwc1 | 12-day | 2525305 | down | GO:0005215 | 0,004404998 | transporter activity |
| Δwc1 | 12-day | 2607025 | down | GO:0005215 | 0,004404998 | transporter activity |
| Δwc1 | 12-day | 2607891 | down | GO:0005215 | 0,004404998 | transporter activity |
| Δwc1 | 12-day | 2608678 | down | GO:0005215 | 0,004404998 | transporter activity |
| Δwc1 | 12-day | 2613255 | down | GO:0005215 | 0,004404998 | transporter activity |
| Δwc1 | 12-day | 2619645 | down | GO:0005215 | 0,004404998 | transporter activity |
| Δwc1 | 12-day | 2620178 | down | GO:0005215 | 0,004404998 | transporter activity |
| Δwc1 | 12-day | 2621828 | down | GO:0005215 | 0,004404998 | transporter activity |
| Δwc1 | 12-day | 2623420 | down | GO:0005215 | 0,004404998 | transporter activity |
| Δwc1 | 12-day | 2623492 | down | GO:0005215 | 0,004404998 | transporter activity |
| Δwc1 | 12-day | 2626803 | down | GO:0005215 | 0,004404998 | transporter activity |

|      |        |         |      |            |             |                      |
|------|--------|---------|------|------------|-------------|----------------------|
| Δwc1 | 12-day | 2627703 | down | GO:0005215 | 0,004404998 | transporter activity |
| Δwc1 | 12-day | 2628751 | down | GO:0005215 | 0,004404998 | transporter activity |
| Δwc1 | 12-day | 2629091 | down | GO:0005215 | 0,004404998 | transporter activity |
| Δwc1 | 12-day | 2629455 | down | GO:0005215 | 0,004404998 | transporter activity |
| Δwc1 | 12-day | 2634793 | down | GO:0005215 | 0,004404998 | transporter activity |
| Δwc1 | 12-day | 2636597 | down | GO:0005215 | 0,004404998 | transporter activity |
| Δwc1 | 12-day | 2637509 | down | GO:0005215 | 0,004404998 | transporter activity |
| Δwc1 | 12-day | 2642018 | down | GO:0005215 | 0,004404998 | transporter activity |
| Δwc1 | 12-day | 2661224 | down | GO:0005215 | 0,004404998 | transporter activity |
| Δwc1 | 12-day | 2701571 | down | GO:0005215 | 0,004404998 | transporter activity |
| Δwc1 | 12-day | 2712060 | down | GO:0005215 | 0,004404998 | transporter activity |
| Δwc1 | 12-day | 1152293 | down | GO:0005488 | 0,009467052 | binding              |
| Δwc1 | 12-day | 1267603 | down | GO:0005488 | 0,009467052 | binding              |
| Δwc1 | 12-day | 1357952 | down | GO:0005488 | 0,009467052 | binding              |
| Δwc1 | 12-day | 2085050 | down | GO:0005488 | 0,009467052 | binding              |
| Δwc1 | 12-day | 2135332 | down | GO:0005488 | 0,009467052 | binding              |
| Δwc1 | 12-day | 2161304 | down | GO:0005488 | 0,009467052 | binding              |
| Δwc1 | 12-day | 2194185 | down | GO:0005488 | 0,009467052 | binding              |
| Δwc1 | 12-day | 2255031 | down | GO:0005488 | 0,009467052 | binding              |
| Δwc1 | 12-day | 2333133 | down | GO:0005488 | 0,009467052 | binding              |
| Δwc1 | 12-day | 2481387 | down | GO:0005488 | 0,009467052 | binding              |
| Δwc1 | 12-day | 2492878 | down | GO:0005488 | 0,009467052 | binding              |
| Δwc1 | 12-day | 2494727 | down | GO:0005488 | 0,009467052 | binding              |
| Δwc1 | 12-day | 2520877 | down | GO:0005488 | 0,009467052 | binding              |
| Δwc1 | 12-day | 2606988 | down | GO:0005488 | 0,009467052 | binding              |
| Δwc1 | 12-day | 2608048 | down | GO:0005488 | 0,009467052 | binding              |
| Δwc1 | 12-day | 2610372 | down | GO:0005488 | 0,009467052 | binding              |
| Δwc1 | 12-day | 2610587 | down | GO:0005488 | 0,009467052 | binding              |
| Δwc1 | 12-day | 2612806 | down | GO:0005488 | 0,009467052 | binding              |
| Δwc1 | 12-day | 2616880 | down | GO:0005488 | 0,009467052 | binding              |
| Δwc1 | 12-day | 2616916 | down | GO:0005488 | 0,009467052 | binding              |
| Δwc1 | 12-day | 2618904 | down | GO:0005488 | 0,009467052 | binding              |
| Δwc1 | 12-day | 2619714 | down | GO:0005488 | 0,009467052 | binding              |
| Δwc1 | 12-day | 2621873 | down | GO:0005488 | 0,009467052 | binding              |

|      |        |         |      |            |             |                                                                  |
|------|--------|---------|------|------------|-------------|------------------------------------------------------------------|
| Δwc1 | 12-day | 2623301 | down | GO:0005488 | 0,009467052 | binding                                                          |
| Δwc1 | 12-day | 2624675 | down | GO:0005488 | 0,009467052 | binding                                                          |
| Δwc1 | 12-day | 2625561 | down | GO:0005488 | 0,009467052 | binding                                                          |
| Δwc1 | 12-day | 2625782 | down | GO:0005488 | 0,009467052 | binding                                                          |
| Δwc1 | 12-day | 2626510 | down | GO:0005488 | 0,009467052 | binding                                                          |
| Δwc1 | 12-day | 2627304 | down | GO:0005488 | 0,009467052 | binding                                                          |
| Δwc1 | 12-day | 2628751 | down | GO:0005488 | 0,009467052 | binding                                                          |
| Δwc1 | 12-day | 2629850 | down | GO:0005488 | 0,009467052 | binding                                                          |
| Δwc1 | 12-day | 2631237 | down | GO:0005488 | 0,009467052 | binding                                                          |
| Δwc1 | 12-day | 2632611 | down | GO:0005488 | 0,009467052 | binding                                                          |
| Δwc1 | 12-day | 2633167 | down | GO:0005488 | 0,009467052 | binding                                                          |
| Δwc1 | 12-day | 2633632 | down | GO:0005488 | 0,009467052 | binding                                                          |
| Δwc1 | 12-day | 2634793 | down | GO:0005488 | 0,009467052 | binding                                                          |
| Δwc1 | 12-day | 2637104 | down | GO:0005488 | 0,009467052 | binding                                                          |
| Δwc1 | 12-day | 2638484 | down | GO:0005488 | 0,009467052 | binding                                                          |
| Δwc1 | 12-day | 2641506 | down | GO:0005488 | 0,009467052 | binding                                                          |
| Δwc1 | 12-day | 2641520 | down | GO:0005488 | 0,009467052 | binding                                                          |
| Δwc1 | 12-day | 2644281 | down | GO:0005488 | 0,009467052 | binding                                                          |
| Δwc1 | 12-day | 2644330 | down | GO:0005488 | 0,009467052 | binding                                                          |
| Δwc1 | 12-day | 2645850 | down | GO:0005488 | 0,009467052 | binding                                                          |
| Δwc1 | 12-day | 2660684 | down | GO:0005488 | 0,009467052 | binding                                                          |
| Δwc1 | 12-day | 2661224 | down | GO:0005488 | 0,009467052 | binding                                                          |
| Δwc1 | 12-day | 2705421 | down | GO:0005488 | 0,009467052 | binding                                                          |
| Δwc1 | 12-day | 2711060 | down | GO:0005488 | 0,009467052 | binding                                                          |
| Δwc1 | 12-day | 2744418 | down | GO:0005488 | 0,009467052 | binding                                                          |
| Δwc1 | 12-day | 2285680 | down | GO:0006629 | 0,009467052 | lipid metabolic process                                          |
| Δwc1 | 12-day | 2376858 | down | GO:0006629 | 0,009467052 | lipid metabolic process                                          |
| Δwc1 | 12-day | 2636160 | down | GO:0006629 | 0,009467052 | lipid metabolic process                                          |
| Δwc1 | 12-day | 2641759 | down | GO:0006629 | 0,009467052 | lipid metabolic process                                          |
| Δwc1 | 12-day | 2493870 | down | GO:0042626 | 0,014036571 | ATPase activity, coupled to transmembrane movement of substances |
| Δwc1 | 12-day | 2614908 | down | GO:0042626 | 0,014036571 | ATPase activity, coupled to transmembrane movement of substances |
| Δwc1 | 12-day | 2637190 | down | GO:0042626 | 0,014036571 | ATPase activity, coupled to transmembrane movement of            |

|      |        |         |      |            |             | substances                          |
|------|--------|---------|------|------------|-------------|-------------------------------------|
| Δwc1 | 12-day | 2628225 | down | GO:0005199 | 0,016634694 | structural constituent of cell wall |
| Δwc1 | 12-day | 2629603 | down | GO:0005199 | 0,016634694 | structural constituent of cell wall |
| Δwc1 | 12-day | 2746250 | down | GO:0005199 | 0,016634694 | structural constituent of cell wall |
| Δwc1 | 12-day | 59565   | down | GO:0008843 | 0,016634694 | endochitinase activity              |
| Δwc1 | 12-day | 2520104 | down | GO:0008843 | 0,016634694 | endochitinase activity              |
| Δwc1 | 12-day | 2623305 | down | GO:0008843 | 0,016634694 | endochitinase activity              |
| Δwc1 | 12-day | 2633726 | down | GO:0008843 | 0,016634694 | endochitinase activity              |
| Δwc1 | 12-day | 2706631 | down | GO:0008843 | 0,016634694 | endochitinase activity              |
| Δwc1 | 12-day | 78628   | down | GO:0020037 | 0,016634694 | heme binding                        |
| Δwc1 | 12-day | 81631   | down | GO:0020037 | 0,016634694 | heme binding                        |
| Δwc1 | 12-day | 1131542 | down | GO:0020037 | 0,016634694 | heme binding                        |
| Δwc1 | 12-day | 1139445 | down | GO:0020037 | 0,016634694 | heme binding                        |
| Δwc1 | 12-day | 1188937 | down | GO:0020037 | 0,016634694 | heme binding                        |
| Δwc1 | 12-day | 1189794 | down | GO:0020037 | 0,016634694 | heme binding                        |
| Δwc1 | 12-day | 1193647 | down | GO:0020037 | 0,016634694 | heme binding                        |
| Δwc1 | 12-day | 2327903 | down | GO:0020037 | 0,016634694 | heme binding                        |
| Δwc1 | 12-day | 2376858 | down | GO:0020037 | 0,016634694 | heme binding                        |
| Δwc1 | 12-day | 2484868 | down | GO:0020037 | 0,016634694 | heme binding                        |
| Δwc1 | 12-day | 2486680 | down | GO:0020037 | 0,016634694 | heme binding                        |
| Δwc1 | 12-day | 2497674 | down | GO:0020037 | 0,016634694 | heme binding                        |
| Δwc1 | 12-day | 2510129 | down | GO:0020037 | 0,016634694 | heme binding                        |
| Δwc1 | 12-day | 2512276 | down | GO:0020037 | 0,016634694 | heme binding                        |
| Δwc1 | 12-day | 2583618 | down | GO:0020037 | 0,016634694 | heme binding                        |
| Δwc1 | 12-day | 2604096 | down | GO:0020037 | 0,016634694 | heme binding                        |
| Δwc1 | 12-day | 2604231 | down | GO:0020037 | 0,016634694 | heme binding                        |
| Δwc1 | 12-day | 2604458 | down | GO:0020037 | 0,016634694 | heme binding                        |
| Δwc1 | 12-day | 2604628 | down | GO:0020037 | 0,016634694 | heme binding                        |
| Δwc1 | 12-day | 2604735 | down | GO:0020037 | 0,016634694 | heme binding                        |
| Δwc1 | 12-day | 2609840 | down | GO:0020037 | 0,016634694 | heme binding                        |
| Δwc1 | 12-day | 2611234 | down | GO:0020037 | 0,016634694 | heme binding                        |
| Δwc1 | 12-day | 2616301 | down | GO:0020037 | 0,016634694 | heme binding                        |
| Δwc1 | 12-day | 2619674 | down | GO:0020037 | 0,016634694 | heme binding                        |
| Δwc1 | 12-day | 2621855 | down | GO:0020037 | 0,016634694 | heme binding                        |

|      |        |         |      |            |             |                    |
|------|--------|---------|------|------------|-------------|--------------------|
| Δwc1 | 12-day | 2623115 | down | GO:0020037 | 0,016634694 | heme binding       |
| Δwc1 | 12-day | 2623122 | down | GO:0020037 | 0,016634694 | heme binding       |
| Δwc1 | 12-day | 2623196 | down | GO:0020037 | 0,016634694 | heme binding       |
| Δwc1 | 12-day | 2624504 | down | GO:0020037 | 0,016634694 | heme binding       |
| Δwc1 | 12-day | 2628312 | down | GO:0020037 | 0,016634694 | heme binding       |
| Δwc1 | 12-day | 2628645 | down | GO:0020037 | 0,016634694 | heme binding       |
| Δwc1 | 12-day | 2628651 | down | GO:0020037 | 0,016634694 | heme binding       |
| Δwc1 | 12-day | 2629864 | down | GO:0020037 | 0,016634694 | heme binding       |
| Δwc1 | 12-day | 2632925 | down | GO:0020037 | 0,016634694 | heme binding       |
| Δwc1 | 12-day | 2634283 | down | GO:0020037 | 0,016634694 | heme binding       |
| Δwc1 | 12-day | 2635487 | down | GO:0020037 | 0,016634694 | heme binding       |
| Δwc1 | 12-day | 2635869 | down | GO:0020037 | 0,016634694 | heme binding       |
| Δwc1 | 12-day | 2636160 | down | GO:0020037 | 0,016634694 | heme binding       |
| Δwc1 | 12-day | 2636544 | down | GO:0020037 | 0,016634694 | heme binding       |
| Δwc1 | 12-day | 2637190 | down | GO:0020037 | 0,016634694 | heme binding       |
| Δwc1 | 12-day | 2638355 | down | GO:0020037 | 0,016634694 | heme binding       |
| Δwc1 | 12-day | 2668568 | down | GO:0020037 | 0,016634694 | heme binding       |
| Δwc1 | 12-day | 2703628 | down | GO:0020037 | 0,016634694 | heme binding       |
| Δwc1 | 12-day | 2703966 | down | GO:0020037 | 0,016634694 | heme binding       |
| Δwc1 | 12-day | 2735179 | down | GO:0020037 | 0,016634694 | heme binding       |
| Δwc1 | 12-day | 59565   | down | GO:0004568 | 0,016634694 | chitinase activity |
| Δwc1 | 12-day | 2520104 | down | GO:0004568 | 0,016634694 | chitinase activity |
| Δwc1 | 12-day | 2623305 | down | GO:0004568 | 0,016634694 | chitinase activity |
| Δwc1 | 12-day | 2633726 | down | GO:0004568 | 0,016634694 | chitinase activity |
| Δwc1 | 12-day | 2706631 | down | GO:0004568 | 0,016634694 | chitinase activity |
| Δwc1 | 12-day | 2614257 | down | GO:0005618 | 0,019769883 | cell wall          |
| Δwc1 | 12-day | 2628225 | down | GO:0005618 | 0,019769883 | cell wall          |
| Δwc1 | 12-day | 2629603 | down | GO:0005618 | 0,019769883 | cell wall          |
| Δwc1 | 12-day | 2577992 | down | GO:0004194 | 0,020981612 | pepsin A activity  |
| Δwc1 | 12-day | 2613917 | down | GO:0004194 | 0,020981612 | pepsin A activity  |
| Δwc1 | 12-day | 2616949 | down | GO:0004194 | 0,020981612 | pepsin A activity  |
| Δwc1 | 12-day | 2616991 | down | GO:0004194 | 0,020981612 | pepsin A activity  |
| Δwc1 | 12-day | 2619340 | down | GO:0004194 | 0,020981612 | pepsin A activity  |
| Δwc1 | 12-day | 2619343 | down | GO:0004194 | 0,020981612 | pepsin A activity  |

|              |        |         |    |            |          |                  |
|--------------|--------|---------|----|------------|----------|------------------|
| $\Delta$ wc2 | 12-day | 1083109 | up | GO:0020037 | 7,28E-10 | heme binding     |
| $\Delta$ wc2 | 12-day | 1112937 | up | GO:0020037 | 7,28E-10 | heme binding     |
| $\Delta$ wc2 | 12-day | 1120318 | up | GO:0020037 | 7,28E-10 | heme binding     |
| $\Delta$ wc2 | 12-day | 1147397 | up | GO:0020037 | 7,28E-10 | heme binding     |
| $\Delta$ wc2 | 12-day | 2075136 | up | GO:0020037 | 7,28E-10 | heme binding     |
| $\Delta$ wc2 | 12-day | 2364606 | up | GO:0020037 | 7,28E-10 | heme binding     |
| $\Delta$ wc2 | 12-day | 2491624 | up | GO:0020037 | 7,28E-10 | heme binding     |
| $\Delta$ wc2 | 12-day | 2501258 | up | GO:0020037 | 7,28E-10 | heme binding     |
| $\Delta$ wc2 | 12-day | 2514636 | up | GO:0020037 | 7,28E-10 | heme binding     |
| $\Delta$ wc2 | 12-day | 2537529 | up | GO:0020037 | 7,28E-10 | heme binding     |
| $\Delta$ wc2 | 12-day | 2547557 | up | GO:0020037 | 7,28E-10 | heme binding     |
| $\Delta$ wc2 | 12-day | 2559987 | up | GO:0020037 | 7,28E-10 | heme binding     |
| $\Delta$ wc2 | 12-day | 2583399 | up | GO:0020037 | 7,28E-10 | heme binding     |
| $\Delta$ wc2 | 12-day | 2608091 | up | GO:0020037 | 7,28E-10 | heme binding     |
| $\Delta$ wc2 | 12-day | 2619716 | up | GO:0020037 | 7,28E-10 | heme binding     |
| $\Delta$ wc2 | 12-day | 2620407 | up | GO:0020037 | 7,28E-10 | heme binding     |
| $\Delta$ wc2 | 12-day | 2622782 | up | GO:0020037 | 7,28E-10 | heme binding     |
| $\Delta$ wc2 | 12-day | 2625023 | up | GO:0020037 | 7,28E-10 | heme binding     |
| $\Delta$ wc2 | 12-day | 2625041 | up | GO:0020037 | 7,28E-10 | heme binding     |
| $\Delta$ wc2 | 12-day | 2626841 | up | GO:0020037 | 7,28E-10 | heme binding     |
| $\Delta$ wc2 | 12-day | 2628300 | up | GO:0020037 | 7,28E-10 | heme binding     |
| $\Delta$ wc2 | 12-day | 2635949 | up | GO:0020037 | 7,28E-10 | heme binding     |
| $\Delta$ wc2 | 12-day | 2637467 | up | GO:0020037 | 7,28E-10 | heme binding     |
| $\Delta$ wc2 | 12-day | 2638350 | up | GO:0020037 | 7,28E-10 | heme binding     |
| $\Delta$ wc2 | 12-day | 2640585 | up | GO:0020037 | 7,28E-10 | heme binding     |
| $\Delta$ wc2 | 12-day | 2643274 | up | GO:0020037 | 7,28E-10 | heme binding     |
| $\Delta$ wc2 | 12-day | 2666440 | up | GO:0020037 | 7,28E-10 | heme binding     |
| $\Delta$ wc2 | 12-day | 2673121 | up | GO:0020037 | 7,28E-10 | heme binding     |
| $\Delta$ wc2 | 12-day | 2695849 | up | GO:0020037 | 7,28E-10 | heme binding     |
| $\Delta$ wc2 | 12-day | 1083109 | up | GO:0005506 | 7,28E-10 | iron ion binding |
| $\Delta$ wc2 | 12-day | 1120318 | up | GO:0005506 | 7,28E-10 | iron ion binding |
| $\Delta$ wc2 | 12-day | 1147397 | up | GO:0005506 | 7,28E-10 | iron ion binding |
| $\Delta$ wc2 | 12-day | 2075136 | up | GO:0005506 | 7,28E-10 | iron ion binding |
| $\Delta$ wc2 | 12-day | 2364606 | up | GO:0005506 | 7,28E-10 | iron ion binding |



|              |        |         |    |            |          |                        |
|--------------|--------|---------|----|------------|----------|------------------------|
| $\Delta wc2$ | 12-day | 2491624 | up | GO:0005506 | 7,28E-10 | iron ion binding       |
| $\Delta wc2$ | 12-day | 2501258 | up | GO:0005506 | 7,28E-10 | iron ion binding       |
| $\Delta wc2$ | 12-day | 2514636 | up | GO:0005506 | 7,28E-10 | iron ion binding       |
| $\Delta wc2$ | 12-day | 2537529 | up | GO:0005506 | 7,28E-10 | iron ion binding       |
| $\Delta wc2$ | 12-day | 2547557 | up | GO:0005506 | 7,28E-10 | iron ion binding       |
| $\Delta wc2$ | 12-day | 2559987 | up | GO:0005506 | 7,28E-10 | iron ion binding       |
| $\Delta wc2$ | 12-day | 2619716 | up | GO:0005506 | 7,28E-10 | iron ion binding       |
| $\Delta wc2$ | 12-day | 2620407 | up | GO:0005506 | 7,28E-10 | iron ion binding       |
| $\Delta wc2$ | 12-day | 2622782 | up | GO:0005506 | 7,28E-10 | iron ion binding       |
| $\Delta wc2$ | 12-day | 2625023 | up | GO:0005506 | 7,28E-10 | iron ion binding       |
| $\Delta wc2$ | 12-day | 2626841 | up | GO:0005506 | 7,28E-10 | iron ion binding       |
| $\Delta wc2$ | 12-day | 2628300 | up | GO:0005506 | 7,28E-10 | iron ion binding       |
| $\Delta wc2$ | 12-day | 2635949 | up | GO:0005506 | 7,28E-10 | iron ion binding       |
| $\Delta wc2$ | 12-day | 2637467 | up | GO:0005506 | 7,28E-10 | iron ion binding       |
| $\Delta wc2$ | 12-day | 2638350 | up | GO:0005506 | 7,28E-10 | iron ion binding       |
| $\Delta wc2$ | 12-day | 2666440 | up | GO:0005506 | 7,28E-10 | iron ion binding       |
| $\Delta wc2$ | 12-day | 2695849 | up | GO:0005506 | 7,28E-10 | iron ion binding       |
| $\Delta wc2$ | 12-day | 1120318 | up | GO:0004497 | 1,12E-08 | monooxygenase activity |
| $\Delta wc2$ | 12-day | 1147397 | up | GO:0004497 | 1,12E-08 | monooxygenase activity |
| $\Delta wc2$ | 12-day | 1168026 | up | GO:0004497 | 1,12E-08 | monooxygenase activity |
| $\Delta wc2$ | 12-day | 1342670 | up | GO:0004497 | 1,12E-08 | monooxygenase activity |
| $\Delta wc2$ | 12-day | 2213880 | up | GO:0004497 | 1,12E-08 | monooxygenase activity |
| $\Delta wc2$ | 12-day | 2364606 | up | GO:0004497 | 1,12E-08 | monooxygenase activity |
| $\Delta wc2$ | 12-day | 2490194 | up | GO:0004497 | 1,12E-08 | monooxygenase activity |
| $\Delta wc2$ | 12-day | 2491624 | up | GO:0004497 | 1,12E-08 | monooxygenase activity |
| $\Delta wc2$ | 12-day | 2501258 | up | GO:0004497 | 1,12E-08 | monooxygenase activity |
| $\Delta wc2$ | 12-day | 2514636 | up | GO:0004497 | 1,12E-08 | monooxygenase activity |
| $\Delta wc2$ | 12-day | 2537529 | up | GO:0004497 | 1,12E-08 | monooxygenase activity |
| $\Delta wc2$ | 12-day | 2547557 | up | GO:0004497 | 1,12E-08 | monooxygenase activity |
| $\Delta wc2$ | 12-day | 2559987 | up | GO:0004497 | 1,12E-08 | monooxygenase activity |
| $\Delta wc2$ | 12-day | 2573393 | up | GO:0004497 | 1,12E-08 | monooxygenase activity |
| $\Delta wc2$ | 12-day | 2573396 | up | GO:0004497 | 1,12E-08 | monooxygenase activity |
| $\Delta wc2$ | 12-day | 2619716 | up | GO:0004497 | 1,12E-08 | monooxygenase activity |
| $\Delta wc2$ | 12-day | 2620407 | up | GO:0004497 | 1,12E-08 | monooxygenase activity |

|              |        |         |    |            |          |                                   |
|--------------|--------|---------|----|------------|----------|-----------------------------------|
| $\Delta wc2$ | 12-day | 2622782 | up | GO:0004497 | 1,12E-08 | monooxygenase activity            |
| $\Delta wc2$ | 12-day | 2625023 | up | GO:0004497 | 1,12E-08 | monooxygenase activity            |
| $\Delta wc2$ | 12-day | 2626841 | up | GO:0004497 | 1,12E-08 | monooxygenase activity            |
| $\Delta wc2$ | 12-day | 2628300 | up | GO:0004497 | 1,12E-08 | monooxygenase activity            |
| $\Delta wc2$ | 12-day | 2635949 | up | GO:0004497 | 1,12E-08 | monooxygenase activity            |
| $\Delta wc2$ | 12-day | 2637467 | up | GO:0004497 | 1,12E-08 | monooxygenase activity            |
| $\Delta wc2$ | 12-day | 2638350 | up | GO:0004497 | 1,12E-08 | monooxygenase activity            |
| $\Delta wc2$ | 12-day | 2666440 | up | GO:0004497 | 1,12E-08 | monooxygenase activity            |
| $\Delta wc2$ | 12-day | 2695849 | up | GO:0004497 | 1,12E-08 | monooxygenase activity            |
| $\Delta wc2$ | 12-day | 2703927 | up | GO:0004497 | 1,12E-08 | monooxygenase activity            |
| $\Delta wc2$ | 12-day | 1120318 | up | GO:0050381 | 9,26E-08 | unspecific monooxygenase activity |
| $\Delta wc2$ | 12-day | 2491624 | up | GO:0050381 | 9,26E-08 | unspecific monooxygenase activity |
| $\Delta wc2$ | 12-day | 2514636 | up | GO:0050381 | 9,26E-08 | unspecific monooxygenase activity |
| $\Delta wc2$ | 12-day | 2547557 | up | GO:0050381 | 9,26E-08 | unspecific monooxygenase activity |
| $\Delta wc2$ | 12-day | 2559987 | up | GO:0050381 | 9,26E-08 | unspecific monooxygenase activity |
| $\Delta wc2$ | 12-day | 2619716 | up | GO:0050381 | 9,26E-08 | unspecific monooxygenase activity |
| $\Delta wc2$ | 12-day | 2620407 | up | GO:0050381 | 9,26E-08 | unspecific monooxygenase activity |
| $\Delta wc2$ | 12-day | 2625023 | up | GO:0050381 | 9,26E-08 | unspecific monooxygenase activity |
| $\Delta wc2$ | 12-day | 2637467 | up | GO:0050381 | 9,26E-08 | unspecific monooxygenase activity |
| $\Delta wc2$ | 12-day | 2638350 | up | GO:0050381 | 9,26E-08 | unspecific monooxygenase activity |
| $\Delta wc2$ | 12-day | 2666440 | up | GO:0050381 | 9,26E-08 | unspecific monooxygenase activity |
| $\Delta wc2$ | 12-day | 1112937 | up | GO:0006118 | 1,35E-07 | electron transport                |
| $\Delta wc2$ | 12-day | 1120318 | up | GO:0006118 | 1,35E-07 | electron transport                |
| $\Delta wc2$ | 12-day | 1147397 | up | GO:0006118 | 1,35E-07 | electron transport                |
| $\Delta wc2$ | 12-day | 1168026 | up | GO:0006118 | 1,35E-07 | electron transport                |
| $\Delta wc2$ | 12-day | 1215660 | up | GO:0006118 | 1,35E-07 | electron transport                |
| $\Delta wc2$ | 12-day | 1342670 | up | GO:0006118 | 1,35E-07 | electron transport                |
| $\Delta wc2$ | 12-day | 2075136 | up | GO:0006118 | 1,35E-07 | electron transport                |
| $\Delta wc2$ | 12-day | 2213880 | up | GO:0006118 | 1,35E-07 | electron transport                |
| $\Delta wc2$ | 12-day | 2364606 | up | GO:0006118 | 1,35E-07 | electron transport                |
| $\Delta wc2$ | 12-day | 2457440 | up | GO:0006118 | 1,35E-07 | electron transport                |
| $\Delta wc2$ | 12-day | 2490194 | up | GO:0006118 | 1,35E-07 | electron transport                |
| $\Delta wc2$ | 12-day | 2491624 | up | GO:0006118 | 1,35E-07 | electron transport                |
| $\Delta wc2$ | 12-day | 2501258 | up | GO:0006118 | 1,35E-07 | electron transport                |

|              |        |         |    |            |          |                    |
|--------------|--------|---------|----|------------|----------|--------------------|
| $\Delta$ wc2 | 12-day | 2505277 | up | GO:0006118 | 1,35E-07 | electron transport |
| $\Delta$ wc2 | 12-day | 2508276 | up | GO:0006118 | 1,35E-07 | electron transport |
| $\Delta$ wc2 | 12-day | 2514636 | up | GO:0006118 | 1,35E-07 | electron transport |
| $\Delta$ wc2 | 12-day | 2525011 | up | GO:0006118 | 1,35E-07 | electron transport |
| $\Delta$ wc2 | 12-day | 2537529 | up | GO:0006118 | 1,35E-07 | electron transport |
| $\Delta$ wc2 | 12-day | 2547557 | up | GO:0006118 | 1,35E-07 | electron transport |
| $\Delta$ wc2 | 12-day | 2559987 | up | GO:0006118 | 1,35E-07 | electron transport |
| $\Delta$ wc2 | 12-day | 2573393 | up | GO:0006118 | 1,35E-07 | electron transport |
| $\Delta$ wc2 | 12-day | 2573396 | up | GO:0006118 | 1,35E-07 | electron transport |
| $\Delta$ wc2 | 12-day | 2576903 | up | GO:0006118 | 1,35E-07 | electron transport |
| $\Delta$ wc2 | 12-day | 2583399 | up | GO:0006118 | 1,35E-07 | electron transport |
| $\Delta$ wc2 | 12-day | 2594205 | up | GO:0006118 | 1,35E-07 | electron transport |
| $\Delta$ wc2 | 12-day | 2605889 | up | GO:0006118 | 1,35E-07 | electron transport |
| $\Delta$ wc2 | 12-day | 2608235 | up | GO:0006118 | 1,35E-07 | electron transport |
| $\Delta$ wc2 | 12-day | 2615184 | up | GO:0006118 | 1,35E-07 | electron transport |
| $\Delta$ wc2 | 12-day | 2616557 | up | GO:0006118 | 1,35E-07 | electron transport |
| $\Delta$ wc2 | 12-day | 2619716 | up | GO:0006118 | 1,35E-07 | electron transport |
| $\Delta$ wc2 | 12-day | 2620407 | up | GO:0006118 | 1,35E-07 | electron transport |
| $\Delta$ wc2 | 12-day | 2622733 | up | GO:0006118 | 1,35E-07 | electron transport |
| $\Delta$ wc2 | 12-day | 2622782 | up | GO:0006118 | 1,35E-07 | electron transport |
| $\Delta$ wc2 | 12-day | 2625023 | up | GO:0006118 | 1,35E-07 | electron transport |
| $\Delta$ wc2 | 12-day | 2625041 | up | GO:0006118 | 1,35E-07 | electron transport |
| $\Delta$ wc2 | 12-day | 2626841 | up | GO:0006118 | 1,35E-07 | electron transport |
| $\Delta$ wc2 | 12-day | 2628120 | up | GO:0006118 | 1,35E-07 | electron transport |
| $\Delta$ wc2 | 12-day | 2628300 | up | GO:0006118 | 1,35E-07 | electron transport |
| $\Delta$ wc2 | 12-day | 2635949 | up | GO:0006118 | 1,35E-07 | electron transport |
| $\Delta$ wc2 | 12-day | 2637467 | up | GO:0006118 | 1,35E-07 | electron transport |
| $\Delta$ wc2 | 12-day | 2638350 | up | GO:0006118 | 1,35E-07 | electron transport |
| $\Delta$ wc2 | 12-day | 2638473 | up | GO:0006118 | 1,35E-07 | electron transport |
| $\Delta$ wc2 | 12-day | 2643274 | up | GO:0006118 | 1,35E-07 | electron transport |
| $\Delta$ wc2 | 12-day | 2666009 | up | GO:0006118 | 1,35E-07 | electron transport |
| $\Delta$ wc2 | 12-day | 2666440 | up | GO:0006118 | 1,35E-07 | electron transport |
| $\Delta$ wc2 | 12-day | 2667289 | up | GO:0006118 | 1,35E-07 | electron transport |
| $\Delta$ wc2 | 12-day | 2695849 | up | GO:0006118 | 1,35E-07 | electron transport |

|              |        |         |    |            |          |                                                      |
|--------------|--------|---------|----|------------|----------|------------------------------------------------------|
| $\Delta$ wc2 | 12-day | 2698211 | up | GO:0006118 | 1,35E-07 | electron transport                                   |
| $\Delta$ wc2 | 12-day | 2703927 | up | GO:0006118 | 1,35E-07 | electron transport                                   |
| $\Delta$ wc2 | 12-day | 66483   | up | GO:0005975 | 4,93E-07 | carbohydrate metabolic process                       |
| $\Delta$ wc2 | 12-day | 85210   | up | GO:0005975 | 4,93E-07 | carbohydrate metabolic process                       |
| $\Delta$ wc2 | 12-day | 234329  | up | GO:0005975 | 4,93E-07 | carbohydrate metabolic process                       |
| $\Delta$ wc2 | 12-day | 2486953 | up | GO:0005975 | 4,93E-07 | carbohydrate metabolic process                       |
| $\Delta$ wc2 | 12-day | 2493241 | up | GO:0005975 | 4,93E-07 | carbohydrate metabolic process                       |
| $\Delta$ wc2 | 12-day | 2514546 | up | GO:0005975 | 4,93E-07 | carbohydrate metabolic process                       |
| $\Delta$ wc2 | 12-day | 2570936 | up | GO:0005975 | 4,93E-07 | carbohydrate metabolic process                       |
| $\Delta$ wc2 | 12-day | 2607436 | up | GO:0005975 | 4,93E-07 | carbohydrate metabolic process                       |
| $\Delta$ wc2 | 12-day | 2613657 | up | GO:0005975 | 4,93E-07 | carbohydrate metabolic process                       |
| $\Delta$ wc2 | 12-day | 2621806 | up | GO:0005975 | 4,93E-07 | carbohydrate metabolic process                       |
| $\Delta$ wc2 | 12-day | 2622563 | up | GO:0005975 | 4,93E-07 | carbohydrate metabolic process                       |
| $\Delta$ wc2 | 12-day | 2624823 | up | GO:0005975 | 4,93E-07 | carbohydrate metabolic process                       |
| $\Delta$ wc2 | 12-day | 2628008 | up | GO:0005975 | 4,93E-07 | carbohydrate metabolic process                       |
| $\Delta$ wc2 | 12-day | 2631621 | up | GO:0005975 | 4,93E-07 | carbohydrate metabolic process                       |
| $\Delta$ wc2 | 12-day | 2633791 | up | GO:0005975 | 4,93E-07 | carbohydrate metabolic process                       |
| $\Delta$ wc2 | 12-day | 2637065 | up | GO:0005975 | 4,93E-07 | carbohydrate metabolic process                       |
| $\Delta$ wc2 | 12-day | 2641020 | up | GO:0005975 | 4,93E-07 | carbohydrate metabolic process                       |
| $\Delta$ wc2 | 12-day | 2642958 | up | GO:0005975 | 4,93E-07 | carbohydrate metabolic process                       |
| $\Delta$ wc2 | 12-day | 2643740 | up | GO:0005975 | 4,93E-07 | carbohydrate metabolic process                       |
| $\Delta$ wc2 | 12-day | 2644666 | up | GO:0005975 | 4,93E-07 | carbohydrate metabolic process                       |
| $\Delta$ wc2 | 12-day | 2670422 | up | GO:0005975 | 4,93E-07 | carbohydrate metabolic process                       |
| $\Delta$ wc2 | 12-day | 2686544 | up | GO:0005975 | 4,93E-07 | carbohydrate metabolic process                       |
| $\Delta$ wc2 | 12-day | 85210   | up | GO:0004553 | 2,01E-05 | hydrolase activity, hydrolyzing O-glycosyl compounds |
| $\Delta$ wc2 | 12-day | 234329  | up | GO:0004553 | 2,01E-05 | hydrolase activity, hydrolyzing O-glycosyl compounds |
| $\Delta$ wc2 | 12-day | 2486953 | up | GO:0004553 | 2,01E-05 | hydrolase activity, hydrolyzing O-glycosyl compounds |
| $\Delta$ wc2 | 12-day | 2613657 | up | GO:0004553 | 2,01E-05 | hydrolase activity, hydrolyzing O-glycosyl compounds |
| $\Delta$ wc2 | 12-day | 2621806 | up | GO:0004553 | 2,01E-05 | hydrolase activity, hydrolyzing O-glycosyl compounds |
| $\Delta$ wc2 | 12-day | 2622563 | up | GO:0004553 | 2,01E-05 | hydrolase activity, hydrolyzing O-glycosyl compounds |
| $\Delta$ wc2 | 12-day | 2637065 | up | GO:0004553 | 2,01E-05 | hydrolase activity, hydrolyzing O-glycosyl compounds |
| $\Delta$ wc2 | 12-day | 2642958 | up | GO:0004553 | 2,01E-05 | hydrolase activity, hydrolyzing O-glycosyl compounds |
| $\Delta$ wc2 | 12-day | 2643740 | up | GO:0004553 | 2,01E-05 | hydrolase activity, hydrolyzing O-glycosyl compounds |
| $\Delta$ wc2 | 12-day | 2644666 | up | GO:0004553 | 2,01E-05 | hydrolase activity, hydrolyzing O-glycosyl compounds |

|              |        |         |    |            |             |                                                      |
|--------------|--------|---------|----|------------|-------------|------------------------------------------------------|
| $\Delta$ wc2 | 12-day | 2670422 | up | GO:0004553 | 2,01E-05    | hydrolase activity, hydrolyzing O-glycosyl compounds |
| $\Delta$ wc2 | 12-day | 2686544 | up | GO:0004553 | 2,01E-05    | hydrolase activity, hydrolyzing O-glycosyl compounds |
| $\Delta$ wc2 | 12-day | 1136736 | up | GO:0005215 | 0,000853245 | transporter activity                                 |
| $\Delta$ wc2 | 12-day | 1171024 | up | GO:0005215 | 0,000853245 | transporter activity                                 |
| $\Delta$ wc2 | 12-day | 1234296 | up | GO:0005215 | 0,000853245 | transporter activity                                 |
| $\Delta$ wc2 | 12-day | 2481323 | up | GO:0005215 | 0,000853245 | transporter activity                                 |
| $\Delta$ wc2 | 12-day | 2498026 | up | GO:0005215 | 0,000853245 | transporter activity                                 |
| $\Delta$ wc2 | 12-day | 2499364 | up | GO:0005215 | 0,000853245 | transporter activity                                 |
| $\Delta$ wc2 | 12-day | 2502284 | up | GO:0005215 | 0,000853245 | transporter activity                                 |
| $\Delta$ wc2 | 12-day | 2508421 | up | GO:0005215 | 0,000853245 | transporter activity                                 |
| $\Delta$ wc2 | 12-day | 2550496 | up | GO:0005215 | 0,000853245 | transporter activity                                 |
| $\Delta$ wc2 | 12-day | 2564524 | up | GO:0005215 | 0,000853245 | transporter activity                                 |
| $\Delta$ wc2 | 12-day | 2612313 | up | GO:0005215 | 0,000853245 | transporter activity                                 |
| $\Delta$ wc2 | 12-day | 2617636 | up | GO:0005215 | 0,000853245 | transporter activity                                 |
| $\Delta$ wc2 | 12-day | 2618842 | up | GO:0005215 | 0,000853245 | transporter activity                                 |
| $\Delta$ wc2 | 12-day | 2619010 | up | GO:0005215 | 0,000853245 | transporter activity                                 |
| $\Delta$ wc2 | 12-day | 2622931 | up | GO:0005215 | 0,000853245 | transporter activity                                 |
| $\Delta$ wc2 | 12-day | 2623043 | up | GO:0005215 | 0,000853245 | transporter activity                                 |
| $\Delta$ wc2 | 12-day | 2625041 | up | GO:0005215 | 0,000853245 | transporter activity                                 |
| $\Delta$ wc2 | 12-day | 2628098 | up | GO:0005215 | 0,000853245 | transporter activity                                 |
| $\Delta$ wc2 | 12-day | 2628982 | up | GO:0005215 | 0,000853245 | transporter activity                                 |
| $\Delta$ wc2 | 12-day | 2630257 | up | GO:0005215 | 0,000853245 | transporter activity                                 |
| $\Delta$ wc2 | 12-day | 2631348 | up | GO:0005215 | 0,000853245 | transporter activity                                 |
| $\Delta$ wc2 | 12-day | 2632105 | up | GO:0005215 | 0,000853245 | transporter activity                                 |
| $\Delta$ wc2 | 12-day | 2633206 | up | GO:0005215 | 0,000853245 | transporter activity                                 |
| $\Delta$ wc2 | 12-day | 2633212 | up | GO:0005215 | 0,000853245 | transporter activity                                 |
| $\Delta$ wc2 | 12-day | 2633596 | up | GO:0005215 | 0,000853245 | transporter activity                                 |
| $\Delta$ wc2 | 12-day | 2637652 | up | GO:0005215 | 0,000853245 | transporter activity                                 |
| $\Delta$ wc2 | 12-day | 2641095 | up | GO:0005215 | 0,000853245 | transporter activity                                 |
| $\Delta$ wc2 | 12-day | 2641735 | up | GO:0005215 | 0,000853245 | transporter activity                                 |
| $\Delta$ wc2 | 12-day | 2642894 | up | GO:0005215 | 0,000853245 | transporter activity                                 |
| $\Delta$ wc2 | 12-day | 2660764 | up | GO:0005215 | 0,000853245 | transporter activity                                 |
| $\Delta$ wc2 | 12-day | 2663452 | up | GO:0005215 | 0,000853245 | transporter activity                                 |
| $\Delta$ wc2 | 12-day | 2680674 | up | GO:0005215 | 0,000853245 | transporter activity                                 |

|              |        |         |    |            |             |                      |
|--------------|--------|---------|----|------------|-------------|----------------------|
| $\Delta wc2$ | 12-day | 2698170 | up | GO:0005215 | 0,000853245 | transporter activity |
| $\Delta wc2$ | 12-day | 2704067 | up | GO:0005215 | 0,000853245 | transporter activity |
| $\Delta wc2$ | 12-day | 83108   | up | GO:0005524 | 0,006553369 | ATP binding          |
| $\Delta wc2$ | 12-day | 258402  | up | GO:0005524 | 0,006553369 | ATP binding          |
| $\Delta wc2$ | 12-day | 1129062 | up | GO:0005524 | 0,006553369 | ATP binding          |
| $\Delta wc2$ | 12-day | 1157948 | up | GO:0005524 | 0,006553369 | ATP binding          |
| $\Delta wc2$ | 12-day | 1158800 | up | GO:0005524 | 0,006553369 | ATP binding          |
| $\Delta wc2$ | 12-day | 1172108 | up | GO:0005524 | 0,006553369 | ATP binding          |
| $\Delta wc2$ | 12-day | 1174869 | up | GO:0005524 | 0,006553369 | ATP binding          |
| $\Delta wc2$ | 12-day | 1178759 | up | GO:0005524 | 0,006553369 | ATP binding          |
| $\Delta wc2$ | 12-day | 1181112 | up | GO:0005524 | 0,006553369 | ATP binding          |
| $\Delta wc2$ | 12-day | 1186310 | up | GO:0005524 | 0,006553369 | ATP binding          |
| $\Delta wc2$ | 12-day | 1191914 | up | GO:0005524 | 0,006553369 | ATP binding          |
| $\Delta wc2$ | 12-day | 2253810 | up | GO:0005524 | 0,006553369 | ATP binding          |
| $\Delta wc2$ | 12-day | 2481145 | up | GO:0005524 | 0,006553369 | ATP binding          |
| $\Delta wc2$ | 12-day | 2484841 | up | GO:0005524 | 0,006553369 | ATP binding          |
| $\Delta wc2$ | 12-day | 2485795 | up | GO:0005524 | 0,006553369 | ATP binding          |
| $\Delta wc2$ | 12-day | 2486797 | up | GO:0005524 | 0,006553369 | ATP binding          |
| $\Delta wc2$ | 12-day | 2490024 | up | GO:0005524 | 0,006553369 | ATP binding          |
| $\Delta wc2$ | 12-day | 2490823 | up | GO:0005524 | 0,006553369 | ATP binding          |
| $\Delta wc2$ | 12-day | 2493556 | up | GO:0005524 | 0,006553369 | ATP binding          |
| $\Delta wc2$ | 12-day | 2495301 | up | GO:0005524 | 0,006553369 | ATP binding          |
| $\Delta wc2$ | 12-day | 2503832 | up | GO:0005524 | 0,006553369 | ATP binding          |
| $\Delta wc2$ | 12-day | 2510275 | up | GO:0005524 | 0,006553369 | ATP binding          |
| $\Delta wc2$ | 12-day | 2511561 | up | GO:0005524 | 0,006553369 | ATP binding          |
| $\Delta wc2$ | 12-day | 2514780 | up | GO:0005524 | 0,006553369 | ATP binding          |
| $\Delta wc2$ | 12-day | 2520682 | up | GO:0005524 | 0,006553369 | ATP binding          |
| $\Delta wc2$ | 12-day | 2527752 | up | GO:0005524 | 0,006553369 | ATP binding          |
| $\Delta wc2$ | 12-day | 2530387 | up | GO:0005524 | 0,006553369 | ATP binding          |
| $\Delta wc2$ | 12-day | 2533371 | up | GO:0005524 | 0,006553369 | ATP binding          |
| $\Delta wc2$ | 12-day | 2535079 | up | GO:0005524 | 0,006553369 | ATP binding          |
| $\Delta wc2$ | 12-day | 2535527 | up | GO:0005524 | 0,006553369 | ATP binding          |
| $\Delta wc2$ | 12-day | 2536562 | up | GO:0005524 | 0,006553369 | ATP binding          |
| $\Delta wc2$ | 12-day | 2540501 | up | GO:0005524 | 0,006553369 | ATP binding          |

|              |        |         |    |            |             |             |
|--------------|--------|---------|----|------------|-------------|-------------|
| $\Delta$ wc2 | 12-day | 2550266 | up | GO:0005524 | 0,006553369 | ATP binding |
| $\Delta$ wc2 | 12-day | 2550939 | up | GO:0005524 | 0,006553369 | ATP binding |
| $\Delta$ wc2 | 12-day | 2553325 | up | GO:0005524 | 0,006553369 | ATP binding |
| $\Delta$ wc2 | 12-day | 2554917 | up | GO:0005524 | 0,006553369 | ATP binding |
| $\Delta$ wc2 | 12-day | 2563653 | up | GO:0005524 | 0,006553369 | ATP binding |
| $\Delta$ wc2 | 12-day | 2565471 | up | GO:0005524 | 0,006553369 | ATP binding |
| $\Delta$ wc2 | 12-day | 2568673 | up | GO:0005524 | 0,006553369 | ATP binding |
| $\Delta$ wc2 | 12-day | 2569377 | up | GO:0005524 | 0,006553369 | ATP binding |
| $\Delta$ wc2 | 12-day | 2583917 | up | GO:0005524 | 0,006553369 | ATP binding |
| $\Delta$ wc2 | 12-day | 2585476 | up | GO:0005524 | 0,006553369 | ATP binding |
| $\Delta$ wc2 | 12-day | 2585708 | up | GO:0005524 | 0,006553369 | ATP binding |
| $\Delta$ wc2 | 12-day | 2601543 | up | GO:0005524 | 0,006553369 | ATP binding |
| $\Delta$ wc2 | 12-day | 2605230 | up | GO:0005524 | 0,006553369 | ATP binding |
| $\Delta$ wc2 | 12-day | 2605455 | up | GO:0005524 | 0,006553369 | ATP binding |
| $\Delta$ wc2 | 12-day | 2606202 | up | GO:0005524 | 0,006553369 | ATP binding |
| $\Delta$ wc2 | 12-day | 2610180 | up | GO:0005524 | 0,006553369 | ATP binding |
| $\Delta$ wc2 | 12-day | 2610629 | up | GO:0005524 | 0,006553369 | ATP binding |
| $\Delta$ wc2 | 12-day | 2611113 | up | GO:0005524 | 0,006553369 | ATP binding |
| $\Delta$ wc2 | 12-day | 2611700 | up | GO:0005524 | 0,006553369 | ATP binding |
| $\Delta$ wc2 | 12-day | 2612206 | up | GO:0005524 | 0,006553369 | ATP binding |
| $\Delta$ wc2 | 12-day | 2612608 | up | GO:0005524 | 0,006553369 | ATP binding |
| $\Delta$ wc2 | 12-day | 2612626 | up | GO:0005524 | 0,006553369 | ATP binding |
| $\Delta$ wc2 | 12-day | 2614761 | up | GO:0005524 | 0,006553369 | ATP binding |
| $\Delta$ wc2 | 12-day | 2614856 | up | GO:0005524 | 0,006553369 | ATP binding |
| $\Delta$ wc2 | 12-day | 2616339 | up | GO:0005524 | 0,006553369 | ATP binding |
| $\Delta$ wc2 | 12-day | 2620969 | up | GO:0005524 | 0,006553369 | ATP binding |
| $\Delta$ wc2 | 12-day | 2621533 | up | GO:0005524 | 0,006553369 | ATP binding |
| $\Delta$ wc2 | 12-day | 2621741 | up | GO:0005524 | 0,006553369 | ATP binding |
| $\Delta$ wc2 | 12-day | 2623214 | up | GO:0005524 | 0,006553369 | ATP binding |
| $\Delta$ wc2 | 12-day | 2623257 | up | GO:0005524 | 0,006553369 | ATP binding |
| $\Delta$ wc2 | 12-day | 2623685 | up | GO:0005524 | 0,006553369 | ATP binding |
| $\Delta$ wc2 | 12-day | 2626895 | up | GO:0005524 | 0,006553369 | ATP binding |
| $\Delta$ wc2 | 12-day | 2631390 | up | GO:0005524 | 0,006553369 | ATP binding |
| $\Delta$ wc2 | 12-day | 2632313 | up | GO:0005524 | 0,006553369 | ATP binding |

|      |        |         |      |            |             |                     |
|------|--------|---------|------|------------|-------------|---------------------|
| Δwc2 | 12-day | 2632374 | up   | GO:0005524 | 0,006553369 | ATP binding         |
| Δwc2 | 12-day | 2633881 | up   | GO:0005524 | 0,006553369 | ATP binding         |
| Δwc2 | 12-day | 2636368 | up   | GO:0005524 | 0,006553369 | ATP binding         |
| Δwc2 | 12-day | 2636577 | up   | GO:0005524 | 0,006553369 | ATP binding         |
| Δwc2 | 12-day | 2638986 | up   | GO:0005524 | 0,006553369 | ATP binding         |
| Δwc2 | 12-day | 2641678 | up   | GO:0005524 | 0,006553369 | ATP binding         |
| Δwc2 | 12-day | 2645169 | up   | GO:0005524 | 0,006553369 | ATP binding         |
| Δwc2 | 12-day | 2645675 | up   | GO:0005524 | 0,006553369 | ATP binding         |
| Δwc2 | 12-day | 2661304 | up   | GO:0005524 | 0,006553369 | ATP binding         |
| Δwc2 | 12-day | 2671089 | up   | GO:0005524 | 0,006553369 | ATP binding         |
| Δwc2 | 12-day | 2672807 | up   | GO:0005524 | 0,006553369 | ATP binding         |
| Δwc2 | 12-day | 2675859 | up   | GO:0005524 | 0,006553369 | ATP binding         |
| Δwc2 | 12-day | 2682841 | up   | GO:0005524 | 0,006553369 | ATP binding         |
| Δwc2 | 12-day | 2684163 | up   | GO:0005524 | 0,006553369 | ATP binding         |
| Δwc2 | 12-day | 2689581 | up   | GO:0005524 | 0,006553369 | ATP binding         |
| Δwc2 | 12-day | 2693043 | up   | GO:0005524 | 0,006553369 | ATP binding         |
| Δwc2 | 12-day | 2693940 | up   | GO:0005524 | 0,006553369 | ATP binding         |
| Δwc2 | 12-day | 2702947 | up   | GO:0005524 | 0,006553369 | ATP binding         |
| Δwc2 | 12-day | 2725125 | up   | GO:0005524 | 0,006553369 | ATP binding         |
| Δwc2 | 12-day | 2753335 | up   | GO:0005524 | 0,006553369 | ATP binding         |
| Δwc2 | 12-day | 2606344 | down | GO:0000786 | 7,17E-08    | nucleosome          |
| Δwc2 | 12-day | 2630193 | down | GO:0000786 | 7,17E-08    | nucleosome          |
| Δwc2 | 12-day | 2606344 | down | GO:0006334 | 2,72E-07    | nucleosome assembly |
| Δwc2 | 12-day | 2630193 | down | GO:0006334 | 2,72E-07    | nucleosome assembly |
| Δwc2 | 12-day | 1189569 | down | GO:0003677 | 1,33E-06    | DNA binding         |
| Δwc2 | 12-day | 1192535 | down | GO:0003677 | 1,33E-06    | DNA binding         |
| Δwc2 | 12-day | 2045557 | down | GO:0003677 | 1,33E-06    | DNA binding         |
| Δwc2 | 12-day | 2483746 | down | GO:0003677 | 1,33E-06    | DNA binding         |
| Δwc2 | 12-day | 2503711 | down | GO:0003677 | 1,33E-06    | DNA binding         |
| Δwc2 | 12-day | 2511242 | down | GO:0003677 | 1,33E-06    | DNA binding         |
| Δwc2 | 12-day | 2517503 | down | GO:0003677 | 1,33E-06    | DNA binding         |
| Δwc2 | 12-day | 2596857 | down | GO:0003677 | 1,33E-06    | DNA binding         |
| Δwc2 | 12-day | 2605931 | down | GO:0003677 | 1,33E-06    | DNA binding         |
| Δwc2 | 12-day | 2606344 | down | GO:0003677 | 1,33E-06    | DNA binding         |



|      |        |         |      |            |          |                   |
|------|--------|---------|------|------------|----------|-------------------|
| Δwc2 | 12-day | 2607126 | down | GO:0003677 | 1,33E-06 | DNA binding       |
| Δwc2 | 12-day | 2609231 | down | GO:0003677 | 1,33E-06 | DNA binding       |
| Δwc2 | 12-day | 2613007 | down | GO:0003677 | 1,33E-06 | DNA binding       |
| Δwc2 | 12-day | 2613388 | down | GO:0003677 | 1,33E-06 | DNA binding       |
| Δwc2 | 12-day | 2618564 | down | GO:0003677 | 1,33E-06 | DNA binding       |
| Δwc2 | 12-day | 2620175 | down | GO:0003677 | 1,33E-06 | DNA binding       |
| Δwc2 | 12-day | 2622267 | down | GO:0003677 | 1,33E-06 | DNA binding       |
| Δwc2 | 12-day | 2625706 | down | GO:0003677 | 1,33E-06 | DNA binding       |
| Δwc2 | 12-day | 2628620 | down | GO:0003677 | 1,33E-06 | DNA binding       |
| Δwc2 | 12-day | 2629597 | down | GO:0003677 | 1,33E-06 | DNA binding       |
| Δwc2 | 12-day | 2630193 | down | GO:0003677 | 1,33E-06 | DNA binding       |
| Δwc2 | 12-day | 2634413 | down | GO:0003677 | 1,33E-06 | DNA binding       |
| Δwc2 | 12-day | 2666726 | down | GO:0003677 | 1,33E-06 | DNA binding       |
| Δwc2 | 12-day | 2687845 | down | GO:0003677 | 1,33E-06 | DNA binding       |
| Δwc2 | 12-day | 1152293 | down | GO:0008152 | 6,77E-06 | metabolic process |
| Δwc2 | 12-day | 2135332 | down | GO:0008152 | 6,77E-06 | metabolic process |
| Δwc2 | 12-day | 2194185 | down | GO:0008152 | 6,77E-06 | metabolic process |
| Δwc2 | 12-day | 2255031 | down | GO:0008152 | 6,77E-06 | metabolic process |
| Δwc2 | 12-day | 2333133 | down | GO:0008152 | 6,77E-06 | metabolic process |
| Δwc2 | 12-day | 2492878 | down | GO:0008152 | 6,77E-06 | metabolic process |
| Δwc2 | 12-day | 2495032 | down | GO:0008152 | 6,77E-06 | metabolic process |
| Δwc2 | 12-day | 2507164 | down | GO:0008152 | 6,77E-06 | metabolic process |
| Δwc2 | 12-day | 2509783 | down | GO:0008152 | 6,77E-06 | metabolic process |
| Δwc2 | 12-day | 2511020 | down | GO:0008152 | 6,77E-06 | metabolic process |
| Δwc2 | 12-day | 2515850 | down | GO:0008152 | 6,77E-06 | metabolic process |
| Δwc2 | 12-day | 2553610 | down | GO:0008152 | 6,77E-06 | metabolic process |
| Δwc2 | 12-day | 2577440 | down | GO:0008152 | 6,77E-06 | metabolic process |
| Δwc2 | 12-day | 2587289 | down | GO:0008152 | 6,77E-06 | metabolic process |
| Δwc2 | 12-day | 2604917 | down | GO:0008152 | 6,77E-06 | metabolic process |
| Δwc2 | 12-day | 2606988 | down | GO:0008152 | 6,77E-06 | metabolic process |
| Δwc2 | 12-day | 2607837 | down | GO:0008152 | 6,77E-06 | metabolic process |
| Δwc2 | 12-day | 2608099 | down | GO:0008152 | 6,77E-06 | metabolic process |
| Δwc2 | 12-day | 2609150 | down | GO:0008152 | 6,77E-06 | metabolic process |
| Δwc2 | 12-day | 2610372 | down | GO:0008152 | 6,77E-06 | metabolic process |

|      |        |         |      |            |          |                   |
|------|--------|---------|------|------------|----------|-------------------|
| Δwc2 | 12-day | 2610587 | down | GO:0008152 | 6,77E-06 | metabolic process |
| Δwc2 | 12-day | 2611306 | down | GO:0008152 | 6,77E-06 | metabolic process |
| Δwc2 | 12-day | 2611868 | down | GO:0008152 | 6,77E-06 | metabolic process |
| Δwc2 | 12-day | 2615598 | down | GO:0008152 | 6,77E-06 | metabolic process |
| Δwc2 | 12-day | 2616602 | down | GO:0008152 | 6,77E-06 | metabolic process |
| Δwc2 | 12-day | 2616880 | down | GO:0008152 | 6,77E-06 | metabolic process |
| Δwc2 | 12-day | 2616916 | down | GO:0008152 | 6,77E-06 | metabolic process |
| Δwc2 | 12-day | 2618904 | down | GO:0008152 | 6,77E-06 | metabolic process |
| Δwc2 | 12-day | 2619714 | down | GO:0008152 | 6,77E-06 | metabolic process |
| Δwc2 | 12-day | 2619840 | down | GO:0008152 | 6,77E-06 | metabolic process |
| Δwc2 | 12-day | 2621873 | down | GO:0008152 | 6,77E-06 | metabolic process |
| Δwc2 | 12-day | 2622287 | down | GO:0008152 | 6,77E-06 | metabolic process |
| Δwc2 | 12-day | 2623068 | down | GO:0008152 | 6,77E-06 | metabolic process |
| Δwc2 | 12-day | 2623301 | down | GO:0008152 | 6,77E-06 | metabolic process |
| Δwc2 | 12-day | 2623956 | down | GO:0008152 | 6,77E-06 | metabolic process |
| Δwc2 | 12-day | 2624525 | down | GO:0008152 | 6,77E-06 | metabolic process |
| Δwc2 | 12-day | 2624675 | down | GO:0008152 | 6,77E-06 | metabolic process |
| Δwc2 | 12-day | 2625667 | down | GO:0008152 | 6,77E-06 | metabolic process |
| Δwc2 | 12-day | 2625706 | down | GO:0008152 | 6,77E-06 | metabolic process |
| Δwc2 | 12-day | 2625782 | down | GO:0008152 | 6,77E-06 | metabolic process |
| Δwc2 | 12-day | 2626510 | down | GO:0008152 | 6,77E-06 | metabolic process |
| Δwc2 | 12-day | 2627304 | down | GO:0008152 | 6,77E-06 | metabolic process |
| Δwc2 | 12-day | 2629548 | down | GO:0008152 | 6,77E-06 | metabolic process |
| Δwc2 | 12-day | 2631237 | down | GO:0008152 | 6,77E-06 | metabolic process |
| Δwc2 | 12-day | 2631774 | down | GO:0008152 | 6,77E-06 | metabolic process |
| Δwc2 | 12-day | 2632206 | down | GO:0008152 | 6,77E-06 | metabolic process |
| Δwc2 | 12-day | 2632611 | down | GO:0008152 | 6,77E-06 | metabolic process |
| Δwc2 | 12-day | 2633167 | down | GO:0008152 | 6,77E-06 | metabolic process |
| Δwc2 | 12-day | 2633632 | down | GO:0008152 | 6,77E-06 | metabolic process |
| Δwc2 | 12-day | 2636100 | down | GO:0008152 | 6,77E-06 | metabolic process |
| Δwc2 | 12-day | 2637708 | down | GO:0008152 | 6,77E-06 | metabolic process |
| Δwc2 | 12-day | 2637755 | down | GO:0008152 | 6,77E-06 | metabolic process |
| Δwc2 | 12-day | 2638484 | down | GO:0008152 | 6,77E-06 | metabolic process |
| Δwc2 | 12-day | 2640472 | down | GO:0008152 | 6,77E-06 | metabolic process |

|      |        |         |      |            |          |                    |
|------|--------|---------|------|------------|----------|--------------------|
| Δwc2 | 12-day | 2640484 | down | GO:0008152 | 6,77E-06 | metabolic process  |
| Δwc2 | 12-day | 2640992 | down | GO:0008152 | 6,77E-06 | metabolic process  |
| Δwc2 | 12-day | 2641506 | down | GO:0008152 | 6,77E-06 | metabolic process  |
| Δwc2 | 12-day | 2641520 | down | GO:0008152 | 6,77E-06 | metabolic process  |
| Δwc2 | 12-day | 2643650 | down | GO:0008152 | 6,77E-06 | metabolic process  |
| Δwc2 | 12-day | 2644127 | down | GO:0008152 | 6,77E-06 | metabolic process  |
| Δwc2 | 12-day | 2644281 | down | GO:0008152 | 6,77E-06 | metabolic process  |
| Δwc2 | 12-day | 2644330 | down | GO:0008152 | 6,77E-06 | metabolic process  |
| Δwc2 | 12-day | 2644430 | down | GO:0008152 | 6,77E-06 | metabolic process  |
| Δwc2 | 12-day | 2645207 | down | GO:0008152 | 6,77E-06 | metabolic process  |
| Δwc2 | 12-day | 2645668 | down | GO:0008152 | 6,77E-06 | metabolic process  |
| Δwc2 | 12-day | 2660684 | down | GO:0008152 | 6,77E-06 | metabolic process  |
| Δwc2 | 12-day | 2665516 | down | GO:0008152 | 6,77E-06 | metabolic process  |
| Δwc2 | 12-day | 2673857 | down | GO:0008152 | 6,77E-06 | metabolic process  |
| Δwc2 | 12-day | 2696261 | down | GO:0008152 | 6,77E-06 | metabolic process  |
| Δwc2 | 12-day | 2703509 | down | GO:0008152 | 6,77E-06 | metabolic process  |
| Δwc2 | 12-day | 2705421 | down | GO:0008152 | 6,77E-06 | metabolic process  |
| Δwc2 | 12-day | 2711060 | down | GO:0008152 | 6,77E-06 | metabolic process  |
| Δwc2 | 12-day | 2726410 | down | GO:0008152 | 6,77E-06 | metabolic process  |
| Δwc2 | 12-day | 2728826 | down | GO:0008152 | 6,77E-06 | metabolic process  |
| Δwc2 | 12-day | 85278   | down | GO:0003824 | 6,77E-06 | catalytic activity |
| Δwc2 | 12-day | 237513  | down | GO:0003824 | 6,77E-06 | catalytic activity |
| Δwc2 | 12-day | 1152293 | down | GO:0003824 | 6,77E-06 | catalytic activity |
| Δwc2 | 12-day | 1184723 | down | GO:0003824 | 6,77E-06 | catalytic activity |
| Δwc2 | 12-day | 1185226 | down | GO:0003824 | 6,77E-06 | catalytic activity |
| Δwc2 | 12-day | 1191999 | down | GO:0003824 | 6,77E-06 | catalytic activity |
| Δwc2 | 12-day | 2135332 | down | GO:0003824 | 6,77E-06 | catalytic activity |
| Δwc2 | 12-day | 2194185 | down | GO:0003824 | 6,77E-06 | catalytic activity |
| Δwc2 | 12-day | 2255031 | down | GO:0003824 | 6,77E-06 | catalytic activity |
| Δwc2 | 12-day | 2333133 | down | GO:0003824 | 6,77E-06 | catalytic activity |
| Δwc2 | 12-day | 2368049 | down | GO:0003824 | 6,77E-06 | catalytic activity |
| Δwc2 | 12-day | 2492878 | down | GO:0003824 | 6,77E-06 | catalytic activity |
| Δwc2 | 12-day | 2495032 | down | GO:0003824 | 6,77E-06 | catalytic activity |
| Δwc2 | 12-day | 2509783 | down | GO:0003824 | 6,77E-06 | catalytic activity |

|      |        |         |      |            |          |                    |
|------|--------|---------|------|------------|----------|--------------------|
| Δwc2 | 12-day | 2511020 | down | GO:0003824 | 6,77E-06 | catalytic activity |
| Δwc2 | 12-day | 2512873 | down | GO:0003824 | 6,77E-06 | catalytic activity |
| Δwc2 | 12-day | 2513424 | down | GO:0003824 | 6,77E-06 | catalytic activity |
| Δwc2 | 12-day | 2516444 | down | GO:0003824 | 6,77E-06 | catalytic activity |
| Δwc2 | 12-day | 2587289 | down | GO:0003824 | 6,77E-06 | catalytic activity |
| Δwc2 | 12-day | 2598960 | down | GO:0003824 | 6,77E-06 | catalytic activity |
| Δwc2 | 12-day | 2605122 | down | GO:0003824 | 6,77E-06 | catalytic activity |
| Δwc2 | 12-day | 2606988 | down | GO:0003824 | 6,77E-06 | catalytic activity |
| Δwc2 | 12-day | 2607034 | down | GO:0003824 | 6,77E-06 | catalytic activity |
| Δwc2 | 12-day | 2607837 | down | GO:0003824 | 6,77E-06 | catalytic activity |
| Δwc2 | 12-day | 2610372 | down | GO:0003824 | 6,77E-06 | catalytic activity |
| Δwc2 | 12-day | 2610587 | down | GO:0003824 | 6,77E-06 | catalytic activity |
| Δwc2 | 12-day | 2615598 | down | GO:0003824 | 6,77E-06 | catalytic activity |
| Δwc2 | 12-day | 2616491 | down | GO:0003824 | 6,77E-06 | catalytic activity |
| Δwc2 | 12-day | 2616602 | down | GO:0003824 | 6,77E-06 | catalytic activity |
| Δwc2 | 12-day | 2616880 | down | GO:0003824 | 6,77E-06 | catalytic activity |
| Δwc2 | 12-day | 2616916 | down | GO:0003824 | 6,77E-06 | catalytic activity |
| Δwc2 | 12-day | 2617562 | down | GO:0003824 | 6,77E-06 | catalytic activity |
| Δwc2 | 12-day | 2618252 | down | GO:0003824 | 6,77E-06 | catalytic activity |
| Δwc2 | 12-day | 2618425 | down | GO:0003824 | 6,77E-06 | catalytic activity |
| Δwc2 | 12-day | 2618479 | down | GO:0003824 | 6,77E-06 | catalytic activity |
| Δwc2 | 12-day | 2618904 | down | GO:0003824 | 6,77E-06 | catalytic activity |
| Δwc2 | 12-day | 2618997 | down | GO:0003824 | 6,77E-06 | catalytic activity |
| Δwc2 | 12-day | 2619714 | down | GO:0003824 | 6,77E-06 | catalytic activity |
| Δwc2 | 12-day | 2621873 | down | GO:0003824 | 6,77E-06 | catalytic activity |
| Δwc2 | 12-day | 2622287 | down | GO:0003824 | 6,77E-06 | catalytic activity |
| Δwc2 | 12-day | 2623068 | down | GO:0003824 | 6,77E-06 | catalytic activity |
| Δwc2 | 12-day | 2623301 | down | GO:0003824 | 6,77E-06 | catalytic activity |
| Δwc2 | 12-day | 2624675 | down | GO:0003824 | 6,77E-06 | catalytic activity |
| Δwc2 | 12-day | 2625667 | down | GO:0003824 | 6,77E-06 | catalytic activity |
| Δwc2 | 12-day | 2625782 | down | GO:0003824 | 6,77E-06 | catalytic activity |
| Δwc2 | 12-day | 2625818 | down | GO:0003824 | 6,77E-06 | catalytic activity |
| Δwc2 | 12-day | 2626510 | down | GO:0003824 | 6,77E-06 | catalytic activity |
| Δwc2 | 12-day | 2627304 | down | GO:0003824 | 6,77E-06 | catalytic activity |

|      |        |         |      |            |          |                    |
|------|--------|---------|------|------------|----------|--------------------|
| Δwc2 | 12-day | 2628678 | down | GO:0003824 | 6,77E-06 | catalytic activity |
| Δwc2 | 12-day | 2629548 | down | GO:0003824 | 6,77E-06 | catalytic activity |
| Δwc2 | 12-day | 2630634 | down | GO:0003824 | 6,77E-06 | catalytic activity |
| Δwc2 | 12-day | 2631237 | down | GO:0003824 | 6,77E-06 | catalytic activity |
| Δwc2 | 12-day | 2631394 | down | GO:0003824 | 6,77E-06 | catalytic activity |
| Δwc2 | 12-day | 2632206 | down | GO:0003824 | 6,77E-06 | catalytic activity |
| Δwc2 | 12-day | 2632611 | down | GO:0003824 | 6,77E-06 | catalytic activity |
| Δwc2 | 12-day | 2633144 | down | GO:0003824 | 6,77E-06 | catalytic activity |
| Δwc2 | 12-day | 2633162 | down | GO:0003824 | 6,77E-06 | catalytic activity |
| Δwc2 | 12-day | 2633167 | down | GO:0003824 | 6,77E-06 | catalytic activity |
| Δwc2 | 12-day | 2633632 | down | GO:0003824 | 6,77E-06 | catalytic activity |
| Δwc2 | 12-day | 2634918 | down | GO:0003824 | 6,77E-06 | catalytic activity |
| Δwc2 | 12-day | 2635216 | down | GO:0003824 | 6,77E-06 | catalytic activity |
| Δwc2 | 12-day | 2635219 | down | GO:0003824 | 6,77E-06 | catalytic activity |
| Δwc2 | 12-day | 2638484 | down | GO:0003824 | 6,77E-06 | catalytic activity |
| Δwc2 | 12-day | 2638783 | down | GO:0003824 | 6,77E-06 | catalytic activity |
| Δwc2 | 12-day | 2640484 | down | GO:0003824 | 6,77E-06 | catalytic activity |
| Δwc2 | 12-day | 2640992 | down | GO:0003824 | 6,77E-06 | catalytic activity |
| Δwc2 | 12-day | 2641022 | down | GO:0003824 | 6,77E-06 | catalytic activity |
| Δwc2 | 12-day | 2641506 | down | GO:0003824 | 6,77E-06 | catalytic activity |
| Δwc2 | 12-day | 2641520 | down | GO:0003824 | 6,77E-06 | catalytic activity |
| Δwc2 | 12-day | 2643650 | down | GO:0003824 | 6,77E-06 | catalytic activity |
| Δwc2 | 12-day | 2643902 | down | GO:0003824 | 6,77E-06 | catalytic activity |
| Δwc2 | 12-day | 2644281 | down | GO:0003824 | 6,77E-06 | catalytic activity |
| Δwc2 | 12-day | 2644330 | down | GO:0003824 | 6,77E-06 | catalytic activity |
| Δwc2 | 12-day | 2645207 | down | GO:0003824 | 6,77E-06 | catalytic activity |
| Δwc2 | 12-day | 2645668 | down | GO:0003824 | 6,77E-06 | catalytic activity |
| Δwc2 | 12-day | 2660684 | down | GO:0003824 | 6,77E-06 | catalytic activity |
| Δwc2 | 12-day | 2673857 | down | GO:0003824 | 6,77E-06 | catalytic activity |
| Δwc2 | 12-day | 2688172 | down | GO:0003824 | 6,77E-06 | catalytic activity |
| Δwc2 | 12-day | 2696261 | down | GO:0003824 | 6,77E-06 | catalytic activity |
| Δwc2 | 12-day | 2699217 | down | GO:0003824 | 6,77E-06 | catalytic activity |
| Δwc2 | 12-day | 2703509 | down | GO:0003824 | 6,77E-06 | catalytic activity |
| Δwc2 | 12-day | 2705421 | down | GO:0003824 | 6,77E-06 | catalytic activity |

|              |        |         |      |            |          |                                                                   |
|--------------|--------|---------|------|------------|----------|-------------------------------------------------------------------|
| $\Delta$ wc2 | 12-day | 2711060 | down | GO:0003824 | 6,77E-06 | catalytic activity                                                |
| $\Delta$ wc2 | 12-day | 2725020 | down | GO:0003824 | 6,77E-06 | catalytic activity                                                |
| $\Delta$ wc2 | 12-day | 2493870 | down | GO:0008094 | 3,64E-05 | DNA-dependent ATPase activity                                     |
| $\Delta$ wc2 | 12-day | 2614908 | down | GO:0008094 | 3,64E-05 | DNA-dependent ATPase activity                                     |
| $\Delta$ wc2 | 12-day | 2493870 | down | GO:0015462 | 3,64E-05 | protein-transmembrane transporting ATPase activity                |
| $\Delta$ wc2 | 12-day | 2614908 | down | GO:0015462 | 3,64E-05 | protein-transmembrane transporting ATPase activity                |
| $\Delta$ wc2 | 12-day | 2493870 | down | GO:0004004 | 3,64E-05 | ATP-dependent RNA helicase activity                               |
| $\Delta$ wc2 | 12-day | 2614908 | down | GO:0004004 | 3,64E-05 | ATP-dependent RNA helicase activity                               |
| $\Delta$ wc2 | 12-day | 2493870 | down | GO:0004003 | 3,64E-05 | ATP-dependent DNA helicase activity                               |
| $\Delta$ wc2 | 12-day | 2614908 | down | GO:0004003 | 3,64E-05 | ATP-dependent DNA helicase activity                               |
| $\Delta$ wc2 | 12-day | 2493870 | down | GO:0017116 | 3,64E-05 | single-stranded DNA-dependent ATP-dependent DNA helicase activity |
| $\Delta$ wc2 | 12-day | 2614908 | down | GO:0017116 | 3,64E-05 | single-stranded DNA-dependent ATP-dependent DNA helicase activity |
| $\Delta$ wc2 | 12-day | 2493870 | down | GO:0042623 | 3,64E-05 | ATPase activity, coupled                                          |
| $\Delta$ wc2 | 12-day | 2614908 | down | GO:0042623 | 3,64E-05 | ATPase activity, coupled                                          |
| $\Delta$ wc2 | 12-day | 2493870 | down | GO:0042625 | 3,64E-05 | ATPase activity, coupled to transmembrane movement of ions        |
| $\Delta$ wc2 | 12-day | 2614908 | down | GO:0042625 | 3,64E-05 | ATPase activity, coupled to transmembrane movement of ions        |
| $\Delta$ wc2 | 12-day | 2493870 | down | GO:0042624 | 3,64E-05 | ATPase activity, uncoupled                                        |
| $\Delta$ wc2 | 12-day | 2614908 | down | GO:0042624 | 3,64E-05 | ATPase activity, uncoupled                                        |
| $\Delta$ wc2 | 12-day | 237513  | down | GO:0016491 | 3,64E-05 | oxidoreductase activity                                           |
| $\Delta$ wc2 | 12-day | 1038608 | down | GO:0016491 | 3,64E-05 | oxidoreductase activity                                           |
| $\Delta$ wc2 | 12-day | 1147332 | down | GO:0016491 | 3,64E-05 | oxidoreductase activity                                           |
| $\Delta$ wc2 | 12-day | 1152293 | down | GO:0016491 | 3,64E-05 | oxidoreductase activity                                           |
| $\Delta$ wc2 | 12-day | 2255031 | down | GO:0016491 | 3,64E-05 | oxidoreductase activity                                           |
| $\Delta$ wc2 | 12-day | 2333133 | down | GO:0016491 | 3,64E-05 | oxidoreductase activity                                           |
| $\Delta$ wc2 | 12-day | 2376858 | down | GO:0016491 | 3,64E-05 | oxidoreductase activity                                           |
| $\Delta$ wc2 | 12-day | 2483752 | down | GO:0016491 | 3,64E-05 | oxidoreductase activity                                           |
| $\Delta$ wc2 | 12-day | 2490518 | down | GO:0016491 | 3,64E-05 | oxidoreductase activity                                           |
| $\Delta$ wc2 | 12-day | 2497674 | down | GO:0016491 | 3,64E-05 | oxidoreductase activity                                           |
| $\Delta$ wc2 | 12-day | 2502495 | down | GO:0016491 | 3,64E-05 | oxidoreductase activity                                           |
| $\Delta$ wc2 | 12-day | 2503108 | down | GO:0016491 | 3,64E-05 | oxidoreductase activity                                           |
| $\Delta$ wc2 | 12-day | 2507164 | down | GO:0016491 | 3,64E-05 | oxidoreductase activity                                           |
| $\Delta$ wc2 | 12-day | 2515850 | down | GO:0016491 | 3,64E-05 | oxidoreductase activity                                           |

|      |        |         |      |            |          |                         |
|------|--------|---------|------|------------|----------|-------------------------|
| Δwc2 | 12-day | 2516444 | down | GO:0016491 | 3,64E-05 | oxidoreductase activity |
| Δwc2 | 12-day | 2532967 | down | GO:0016491 | 3,64E-05 | oxidoreductase activity |
| Δwc2 | 12-day | 2543454 | down | GO:0016491 | 3,64E-05 | oxidoreductase activity |
| Δwc2 | 12-day | 2571870 | down | GO:0016491 | 3,64E-05 | oxidoreductase activity |
| Δwc2 | 12-day | 2587289 | down | GO:0016491 | 3,64E-05 | oxidoreductase activity |
| Δwc2 | 12-day | 2606988 | down | GO:0016491 | 3,64E-05 | oxidoreductase activity |
| Δwc2 | 12-day | 2607165 | down | GO:0016491 | 3,64E-05 | oxidoreductase activity |
| Δwc2 | 12-day | 2609840 | down | GO:0016491 | 3,64E-05 | oxidoreductase activity |
| Δwc2 | 12-day | 2610372 | down | GO:0016491 | 3,64E-05 | oxidoreductase activity |
| Δwc2 | 12-day | 2610587 | down | GO:0016491 | 3,64E-05 | oxidoreductase activity |
| Δwc2 | 12-day | 2611538 | down | GO:0016491 | 3,64E-05 | oxidoreductase activity |
| Δwc2 | 12-day | 2611868 | down | GO:0016491 | 3,64E-05 | oxidoreductase activity |
| Δwc2 | 12-day | 2615160 | down | GO:0016491 | 3,64E-05 | oxidoreductase activity |
| Δwc2 | 12-day | 2616880 | down | GO:0016491 | 3,64E-05 | oxidoreductase activity |
| Δwc2 | 12-day | 2616916 | down | GO:0016491 | 3,64E-05 | oxidoreductase activity |
| Δwc2 | 12-day | 2619840 | down | GO:0016491 | 3,64E-05 | oxidoreductase activity |
| Δwc2 | 12-day | 2621035 | down | GO:0016491 | 3,64E-05 | oxidoreductase activity |
| Δwc2 | 12-day | 2621873 | down | GO:0016491 | 3,64E-05 | oxidoreductase activity |
| Δwc2 | 12-day | 2623301 | down | GO:0016491 | 3,64E-05 | oxidoreductase activity |
| Δwc2 | 12-day | 2625667 | down | GO:0016491 | 3,64E-05 | oxidoreductase activity |
| Δwc2 | 12-day | 2627304 | down | GO:0016491 | 3,64E-05 | oxidoreductase activity |
| Δwc2 | 12-day | 2630637 | down | GO:0016491 | 3,64E-05 | oxidoreductase activity |
| Δwc2 | 12-day | 2631774 | down | GO:0016491 | 3,64E-05 | oxidoreductase activity |
| Δwc2 | 12-day | 2632136 | down | GO:0016491 | 3,64E-05 | oxidoreductase activity |
| Δwc2 | 12-day | 2633167 | down | GO:0016491 | 3,64E-05 | oxidoreductase activity |
| Δwc2 | 12-day | 2633632 | down | GO:0016491 | 3,64E-05 | oxidoreductase activity |
| Δwc2 | 12-day | 2637755 | down | GO:0016491 | 3,64E-05 | oxidoreductase activity |
| Δwc2 | 12-day | 2638484 | down | GO:0016491 | 3,64E-05 | oxidoreductase activity |
| Δwc2 | 12-day | 2639682 | down | GO:0016491 | 3,64E-05 | oxidoreductase activity |
| Δwc2 | 12-day | 2641368 | down | GO:0016491 | 3,64E-05 | oxidoreductase activity |
| Δwc2 | 12-day | 2641506 | down | GO:0016491 | 3,64E-05 | oxidoreductase activity |
| Δwc2 | 12-day | 2641520 | down | GO:0016491 | 3,64E-05 | oxidoreductase activity |
| Δwc2 | 12-day | 2644127 | down | GO:0016491 | 3,64E-05 | oxidoreductase activity |
| Δwc2 | 12-day | 2644330 | down | GO:0016491 | 3,64E-05 | oxidoreductase activity |

|              |        |         |      |            |             |                                                                  |
|--------------|--------|---------|------|------------|-------------|------------------------------------------------------------------|
| $\Delta$ wc2 | 12-day | 2644430 | down | GO:0016491 | 3,64E-05    | oxidoreductase activity                                          |
| $\Delta$ wc2 | 12-day | 2661224 | down | GO:0016491 | 3,64E-05    | oxidoreductase activity                                          |
| $\Delta$ wc2 | 12-day | 2663372 | down | GO:0016491 | 3,64E-05    | oxidoreductase activity                                          |
| $\Delta$ wc2 | 12-day | 2688172 | down | GO:0016491 | 3,64E-05    | oxidoreductase activity                                          |
| $\Delta$ wc2 | 12-day | 2697968 | down | GO:0016491 | 3,64E-05    | oxidoreductase activity                                          |
| $\Delta$ wc2 | 12-day | 2705421 | down | GO:0016491 | 3,64E-05    | oxidoreductase activity                                          |
| $\Delta$ wc2 | 12-day | 2482745 | down | GO:0016887 | 3,64E-05    | ATPase activity                                                  |
| $\Delta$ wc2 | 12-day | 2493870 | down | GO:0016887 | 3,64E-05    | ATPase activity                                                  |
| $\Delta$ wc2 | 12-day | 2614908 | down | GO:0016887 | 3,64E-05    | ATPase activity                                                  |
| $\Delta$ wc2 | 12-day | 2637190 | down | GO:0016887 | 3,64E-05    | ATPase activity                                                  |
| $\Delta$ wc2 | 12-day | 2493870 | down | GO:0008186 | 3,64E-05    | RNA-dependent ATPase activity                                    |
| $\Delta$ wc2 | 12-day | 2614908 | down | GO:0008186 | 3,64E-05    | RNA-dependent ATPase activity                                    |
| $\Delta$ wc2 | 12-day | 2512973 | down | GO:0034061 | 9,57E-05    | DNA polymerase activity                                          |
| $\Delta$ wc2 | 12-day | 2493870 | down | GO:0042626 | 0,000109734 | ATPase activity, coupled to transmembrane movement of substances |
| $\Delta$ wc2 | 12-day | 2614908 | down | GO:0042626 | 0,000109734 | ATPase activity, coupled to transmembrane movement of substances |
| $\Delta$ wc2 | 12-day | 2637190 | down | GO:0042626 | 0,000109734 | ATPase activity, coupled to transmembrane movement of substances |
| $\Delta$ wc2 | 12-day | 2512973 | down | GO:0003887 | 0,000169381 | DNA-directed DNA polymerase activity                             |
| $\Delta$ wc2 | 12-day | 1165803 | down | GO:0008026 | 0,000321384 | ATP-dependent helicase activity                                  |
| $\Delta$ wc2 | 12-day | 2482187 | down | GO:0008026 | 0,000321384 | ATP-dependent helicase activity                                  |
| $\Delta$ wc2 | 12-day | 2493870 | down | GO:0008026 | 0,000321384 | ATP-dependent helicase activity                                  |
| $\Delta$ wc2 | 12-day | 2614908 | down | GO:0008026 | 0,000321384 | ATP-dependent helicase activity                                  |
| $\Delta$ wc2 | 12-day | 2695418 | down | GO:0008026 | 0,000321384 | ATP-dependent helicase activity                                  |
| $\Delta$ wc2 | 12-day | 1144263 | down | GO:0006810 | 0,00037026  | transport                                                        |
| $\Delta$ wc2 | 12-day | 1153136 | down | GO:0006810 | 0,00037026  | transport                                                        |
| $\Delta$ wc2 | 12-day | 1154281 | down | GO:0006810 | 0,00037026  | transport                                                        |
| $\Delta$ wc2 | 12-day | 1267603 | down | GO:0006810 | 0,00037026  | transport                                                        |
| $\Delta$ wc2 | 12-day | 1357952 | down | GO:0006810 | 0,00037026  | transport                                                        |
| $\Delta$ wc2 | 12-day | 2122325 | down | GO:0006810 | 0,00037026  | transport                                                        |
| $\Delta$ wc2 | 12-day | 2138287 | down | GO:0006810 | 0,00037026  | transport                                                        |
| $\Delta$ wc2 | 12-day | 2162840 | down | GO:0006810 | 0,00037026  | transport                                                        |
| $\Delta$ wc2 | 12-day | 2481653 | down | GO:0006810 | 0,00037026  | transport                                                        |



|      |        |         |      |            |            |           |
|------|--------|---------|------|------------|------------|-----------|
| Δwc2 | 12-day | 2488542 | down | GO:0006810 | 0,00037026 | transport |
| Δwc2 | 12-day | 2492878 | down | GO:0006810 | 0,00037026 | transport |
| Δwc2 | 12-day | 2494144 | down | GO:0006810 | 0,00037026 | transport |
| Δwc2 | 12-day | 2494727 | down | GO:0006810 | 0,00037026 | transport |
| Δwc2 | 12-day | 2514012 | down | GO:0006810 | 0,00037026 | transport |
| Δwc2 | 12-day | 2520877 | down | GO:0006810 | 0,00037026 | transport |
| Δwc2 | 12-day | 2525305 | down | GO:0006810 | 0,00037026 | transport |
| Δwc2 | 12-day | 2576922 | down | GO:0006810 | 0,00037026 | transport |
| Δwc2 | 12-day | 2600551 | down | GO:0006810 | 0,00037026 | transport |
| Δwc2 | 12-day | 2607025 | down | GO:0006810 | 0,00037026 | transport |
| Δwc2 | 12-day | 2607891 | down | GO:0006810 | 0,00037026 | transport |
| Δwc2 | 12-day | 2608678 | down | GO:0006810 | 0,00037026 | transport |
| Δwc2 | 12-day | 2609987 | down | GO:0006810 | 0,00037026 | transport |
| Δwc2 | 12-day | 2611816 | down | GO:0006810 | 0,00037026 | transport |
| Δwc2 | 12-day | 2612806 | down | GO:0006810 | 0,00037026 | transport |
| Δwc2 | 12-day | 2613255 | down | GO:0006810 | 0,00037026 | transport |
| Δwc2 | 12-day | 2616602 | down | GO:0006810 | 0,00037026 | transport |
| Δwc2 | 12-day | 2619645 | down | GO:0006810 | 0,00037026 | transport |
| Δwc2 | 12-day | 2620178 | down | GO:0006810 | 0,00037026 | transport |
| Δwc2 | 12-day | 2620830 | down | GO:0006810 | 0,00037026 | transport |
| Δwc2 | 12-day | 2621828 | down | GO:0006810 | 0,00037026 | transport |
| Δwc2 | 12-day | 2622598 | down | GO:0006810 | 0,00037026 | transport |
| Δwc2 | 12-day | 2623420 | down | GO:0006810 | 0,00037026 | transport |
| Δwc2 | 12-day | 2623492 | down | GO:0006810 | 0,00037026 | transport |
| Δwc2 | 12-day | 2626803 | down | GO:0006810 | 0,00037026 | transport |
| Δwc2 | 12-day | 2627703 | down | GO:0006810 | 0,00037026 | transport |
| Δwc2 | 12-day | 2628751 | down | GO:0006810 | 0,00037026 | transport |
| Δwc2 | 12-day | 2629091 | down | GO:0006810 | 0,00037026 | transport |
| Δwc2 | 12-day | 2629455 | down | GO:0006810 | 0,00037026 | transport |
| Δwc2 | 12-day | 2636597 | down | GO:0006810 | 0,00037026 | transport |
| Δwc2 | 12-day | 2637190 | down | GO:0006810 | 0,00037026 | transport |
| Δwc2 | 12-day | 2637509 | down | GO:0006810 | 0,00037026 | transport |
| Δwc2 | 12-day | 2642018 | down | GO:0006810 | 0,00037026 | transport |
| Δwc2 | 12-day | 2645850 | down | GO:0006810 | 0,00037026 | transport |

|      |        |         |      |            |             |                    |
|------|--------|---------|------|------------|-------------|--------------------|
| Δwc2 | 12-day | 2661224 | down | GO:0006810 | 0,00037026  | transport          |
| Δwc2 | 12-day | 2662585 | down | GO:0006810 | 0,00037026  | transport          |
| Δwc2 | 12-day | 2701571 | down | GO:0006810 | 0,00037026  | transport          |
| Δwc2 | 12-day | 2712060 | down | GO:0006810 | 0,00037026  | transport          |
| Δwc2 | 12-day | 2738153 | down | GO:0006810 | 0,00037026  | transport          |
| Δwc2 | 12-day | 78628   | down | GO:0006118 | 0,004112859 | electron transport |
| Δwc2 | 12-day | 81631   | down | GO:0006118 | 0,004112859 | electron transport |
| Δwc2 | 12-day | 1038608 | down | GO:0006118 | 0,004112859 | electron transport |
| Δwc2 | 12-day | 1084300 | down | GO:0006118 | 0,004112859 | electron transport |
| Δwc2 | 12-day | 1131542 | down | GO:0006118 | 0,004112859 | electron transport |
| Δwc2 | 12-day | 1189794 | down | GO:0006118 | 0,004112859 | electron transport |
| Δwc2 | 12-day | 1193647 | down | GO:0006118 | 0,004112859 | electron transport |
| Δwc2 | 12-day | 2327903 | down | GO:0006118 | 0,004112859 | electron transport |
| Δwc2 | 12-day | 2450442 | down | GO:0006118 | 0,004112859 | electron transport |
| Δwc2 | 12-day | 2484868 | down | GO:0006118 | 0,004112859 | electron transport |
| Δwc2 | 12-day | 2486680 | down | GO:0006118 | 0,004112859 | electron transport |
| Δwc2 | 12-day | 2490518 | down | GO:0006118 | 0,004112859 | electron transport |
| Δwc2 | 12-day | 2497674 | down | GO:0006118 | 0,004112859 | electron transport |
| Δwc2 | 12-day | 2503108 | down | GO:0006118 | 0,004112859 | electron transport |
| Δwc2 | 12-day | 2507891 | down | GO:0006118 | 0,004112859 | electron transport |
| Δwc2 | 12-day | 2510129 | down | GO:0006118 | 0,004112859 | electron transport |
| Δwc2 | 12-day | 2510618 | down | GO:0006118 | 0,004112859 | electron transport |
| Δwc2 | 12-day | 2512276 | down | GO:0006118 | 0,004112859 | electron transport |
| Δwc2 | 12-day | 2515850 | down | GO:0006118 | 0,004112859 | electron transport |
| Δwc2 | 12-day | 2532967 | down | GO:0006118 | 0,004112859 | electron transport |
| Δwc2 | 12-day | 2571870 | down | GO:0006118 | 0,004112859 | electron transport |
| Δwc2 | 12-day | 2583618 | down | GO:0006118 | 0,004112859 | electron transport |
| Δwc2 | 12-day | 2604096 | down | GO:0006118 | 0,004112859 | electron transport |
| Δwc2 | 12-day | 2604231 | down | GO:0006118 | 0,004112859 | electron transport |
| Δwc2 | 12-day | 2604458 | down | GO:0006118 | 0,004112859 | electron transport |
| Δwc2 | 12-day | 2604628 | down | GO:0006118 | 0,004112859 | electron transport |
| Δwc2 | 12-day | 2604735 | down | GO:0006118 | 0,004112859 | electron transport |
| Δwc2 | 12-day | 2609840 | down | GO:0006118 | 0,004112859 | electron transport |
| Δwc2 | 12-day | 2611234 | down | GO:0006118 | 0,004112859 | electron transport |

|      |        |         |      |            |             |                    |
|------|--------|---------|------|------------|-------------|--------------------|
| Δwc2 | 12-day | 2614998 | down | GO:0006118 | 0,004112859 | electron transport |
| Δwc2 | 12-day | 2616301 | down | GO:0006118 | 0,004112859 | electron transport |
| Δwc2 | 12-day | 2619674 | down | GO:0006118 | 0,004112859 | electron transport |
| Δwc2 | 12-day | 2619840 | down | GO:0006118 | 0,004112859 | electron transport |
| Δwc2 | 12-day | 2621855 | down | GO:0006118 | 0,004112859 | electron transport |
| Δwc2 | 12-day | 2623115 | down | GO:0006118 | 0,004112859 | electron transport |
| Δwc2 | 12-day | 2623122 | down | GO:0006118 | 0,004112859 | electron transport |
| Δwc2 | 12-day | 2623196 | down | GO:0006118 | 0,004112859 | electron transport |
| Δwc2 | 12-day | 2625667 | down | GO:0006118 | 0,004112859 | electron transport |
| Δwc2 | 12-day | 2625951 | down | GO:0006118 | 0,004112859 | electron transport |
| Δwc2 | 12-day | 2628312 | down | GO:0006118 | 0,004112859 | electron transport |
| Δwc2 | 12-day | 2628645 | down | GO:0006118 | 0,004112859 | electron transport |
| Δwc2 | 12-day | 2628651 | down | GO:0006118 | 0,004112859 | electron transport |
| Δwc2 | 12-day | 2629864 | down | GO:0006118 | 0,004112859 | electron transport |
| Δwc2 | 12-day | 2632136 | down | GO:0006118 | 0,004112859 | electron transport |
| Δwc2 | 12-day | 2632925 | down | GO:0006118 | 0,004112859 | electron transport |
| Δwc2 | 12-day | 2633167 | down | GO:0006118 | 0,004112859 | electron transport |
| Δwc2 | 12-day | 2633776 | down | GO:0006118 | 0,004112859 | electron transport |
| Δwc2 | 12-day | 2634283 | down | GO:0006118 | 0,004112859 | electron transport |
| Δwc2 | 12-day | 2635487 | down | GO:0006118 | 0,004112859 | electron transport |
| Δwc2 | 12-day | 2635869 | down | GO:0006118 | 0,004112859 | electron transport |
| Δwc2 | 12-day | 2636544 | down | GO:0006118 | 0,004112859 | electron transport |
| Δwc2 | 12-day | 2637190 | down | GO:0006118 | 0,004112859 | electron transport |
| Δwc2 | 12-day | 2638355 | down | GO:0006118 | 0,004112859 | electron transport |
| Δwc2 | 12-day | 2639682 | down | GO:0006118 | 0,004112859 | electron transport |
| Δwc2 | 12-day | 2644430 | down | GO:0006118 | 0,004112859 | electron transport |
| Δwc2 | 12-day | 2662585 | down | GO:0006118 | 0,004112859 | electron transport |
| Δwc2 | 12-day | 2663372 | down | GO:0006118 | 0,004112859 | electron transport |
| Δwc2 | 12-day | 2668568 | down | GO:0006118 | 0,004112859 | electron transport |
| Δwc2 | 12-day | 2703628 | down | GO:0006118 | 0,004112859 | electron transport |
| Δwc2 | 12-day | 2703966 | down | GO:0006118 | 0,004112859 | electron transport |
| Δwc2 | 12-day | 2735179 | down | GO:0006118 | 0,004112859 | electron transport |
| Δwc2 | 12-day | 1038608 | down | GO:0016020 | 0,008510813 | membrane           |
| Δwc2 | 12-day | 1144263 | down | GO:0016020 | 0,008510813 | membrane           |

|      |        |         |      |            |             |          |
|------|--------|---------|------|------------|-------------|----------|
| Δwc2 | 12-day | 1153136 | down | GO:0016020 | 0,008510813 | membrane |
| Δwc2 | 12-day | 1176319 | down | GO:0016020 | 0,008510813 | membrane |
| Δwc2 | 12-day | 1267603 | down | GO:0016020 | 0,008510813 | membrane |
| Δwc2 | 12-day | 1352010 | down | GO:0016020 | 0,008510813 | membrane |
| Δwc2 | 12-day | 2035630 | down | GO:0016020 | 0,008510813 | membrane |
| Δwc2 | 12-day | 2138287 | down | GO:0016020 | 0,008510813 | membrane |
| Δwc2 | 12-day | 2162840 | down | GO:0016020 | 0,008510813 | membrane |
| Δwc2 | 12-day | 2376858 | down | GO:0016020 | 0,008510813 | membrane |
| Δwc2 | 12-day | 2488542 | down | GO:0016020 | 0,008510813 | membrane |
| Δwc2 | 12-day | 2494727 | down | GO:0016020 | 0,008510813 | membrane |
| Δwc2 | 12-day | 2514012 | down | GO:0016020 | 0,008510813 | membrane |
| Δwc2 | 12-day | 2525305 | down | GO:0016020 | 0,008510813 | membrane |
| Δwc2 | 12-day | 2569923 | down | GO:0016020 | 0,008510813 | membrane |
| Δwc2 | 12-day | 2600551 | down | GO:0016020 | 0,008510813 | membrane |
| Δwc2 | 12-day | 2600584 | down | GO:0016020 | 0,008510813 | membrane |
| Δwc2 | 12-day | 2602793 | down | GO:0016020 | 0,008510813 | membrane |
| Δwc2 | 12-day | 2604437 | down | GO:0016020 | 0,008510813 | membrane |
| Δwc2 | 12-day | 2605277 | down | GO:0016020 | 0,008510813 | membrane |
| Δwc2 | 12-day | 2607008 | down | GO:0016020 | 0,008510813 | membrane |
| Δwc2 | 12-day | 2609987 | down | GO:0016020 | 0,008510813 | membrane |
| Δwc2 | 12-day | 2610450 | down | GO:0016020 | 0,008510813 | membrane |
| Δwc2 | 12-day | 2612806 | down | GO:0016020 | 0,008510813 | membrane |
| Δwc2 | 12-day | 2613255 | down | GO:0016020 | 0,008510813 | membrane |
| Δwc2 | 12-day | 2616602 | down | GO:0016020 | 0,008510813 | membrane |
| Δwc2 | 12-day | 2618425 | down | GO:0016020 | 0,008510813 | membrane |
| Δwc2 | 12-day | 2618479 | down | GO:0016020 | 0,008510813 | membrane |
| Δwc2 | 12-day | 2618895 | down | GO:0016020 | 0,008510813 | membrane |
| Δwc2 | 12-day | 2618950 | down | GO:0016020 | 0,008510813 | membrane |
| Δwc2 | 12-day | 2621162 | down | GO:0016020 | 0,008510813 | membrane |
| Δwc2 | 12-day | 2622595 | down | GO:0016020 | 0,008510813 | membrane |
| Δwc2 | 12-day | 2622598 | down | GO:0016020 | 0,008510813 | membrane |
| Δwc2 | 12-day | 2623420 | down | GO:0016020 | 0,008510813 | membrane |
| Δwc2 | 12-day | 2626064 | down | GO:0016020 | 0,008510813 | membrane |
| Δwc2 | 12-day | 2627703 | down | GO:0016020 | 0,008510813 | membrane |

|      |        |         |      |            |             |                        |
|------|--------|---------|------|------------|-------------|------------------------|
| Δwc2 | 12-day | 2627998 | down | GO:0016020 | 0,008510813 | membrane               |
| Δwc2 | 12-day | 2629091 | down | GO:0016020 | 0,008510813 | membrane               |
| Δwc2 | 12-day | 2638261 | down | GO:0016020 | 0,008510813 | membrane               |
| Δwc2 | 12-day | 2639525 | down | GO:0016020 | 0,008510813 | membrane               |
| Δwc2 | 12-day | 2640951 | down | GO:0016020 | 0,008510813 | membrane               |
| Δwc2 | 12-day | 2640999 | down | GO:0016020 | 0,008510813 | membrane               |
| Δwc2 | 12-day | 2642553 | down | GO:0016020 | 0,008510813 | membrane               |
| Δwc2 | 12-day | 2644280 | down | GO:0016020 | 0,008510813 | membrane               |
| Δwc2 | 12-day | 2645850 | down | GO:0016020 | 0,008510813 | membrane               |
| Δwc2 | 12-day | 2663372 | down | GO:0016020 | 0,008510813 | membrane               |
| Δwc2 | 12-day | 2670534 | down | GO:0016020 | 0,008510813 | membrane               |
| Δwc2 | 12-day | 2673672 | down | GO:0016020 | 0,008510813 | membrane               |
| Δwc2 | 12-day | 2701571 | down | GO:0016020 | 0,008510813 | membrane               |
| Δwc2 | 12-day | 2738153 | down | GO:0016020 | 0,008510813 | membrane               |
| Δwc2 | 12-day | 78628   | down | GO:0004497 | 0,011860413 | monooxygenase activity |
| Δwc2 | 12-day | 81631   | down | GO:0004497 | 0,011860413 | monooxygenase activity |
| Δwc2 | 12-day | 1131542 | down | GO:0004497 | 0,011860413 | monooxygenase activity |
| Δwc2 | 12-day | 1189794 | down | GO:0004497 | 0,011860413 | monooxygenase activity |
| Δwc2 | 12-day | 1193647 | down | GO:0004497 | 0,011860413 | monooxygenase activity |
| Δwc2 | 12-day | 2327903 | down | GO:0004497 | 0,011860413 | monooxygenase activity |
| Δwc2 | 12-day | 2484868 | down | GO:0004497 | 0,011860413 | monooxygenase activity |
| Δwc2 | 12-day | 2486680 | down | GO:0004497 | 0,011860413 | monooxygenase activity |
| Δwc2 | 12-day | 2510129 | down | GO:0004497 | 0,011860413 | monooxygenase activity |
| Δwc2 | 12-day | 2510618 | down | GO:0004497 | 0,011860413 | monooxygenase activity |
| Δwc2 | 12-day | 2512276 | down | GO:0004497 | 0,011860413 | monooxygenase activity |
| Δwc2 | 12-day | 2515850 | down | GO:0004497 | 0,011860413 | monooxygenase activity |
| Δwc2 | 12-day | 2583618 | down | GO:0004497 | 0,011860413 | monooxygenase activity |
| Δwc2 | 12-day | 2604096 | down | GO:0004497 | 0,011860413 | monooxygenase activity |
| Δwc2 | 12-day | 2604231 | down | GO:0004497 | 0,011860413 | monooxygenase activity |
| Δwc2 | 12-day | 2604458 | down | GO:0004497 | 0,011860413 | monooxygenase activity |
| Δwc2 | 12-day | 2604735 | down | GO:0004497 | 0,011860413 | monooxygenase activity |
| Δwc2 | 12-day | 2611234 | down | GO:0004497 | 0,011860413 | monooxygenase activity |
| Δwc2 | 12-day | 2616301 | down | GO:0004497 | 0,011860413 | monooxygenase activity |
| Δwc2 | 12-day | 2619674 | down | GO:0004497 | 0,011860413 | monooxygenase activity |

|      |        |         |      |            |             |                        |
|------|--------|---------|------|------------|-------------|------------------------|
| Δwc2 | 12-day | 2619840 | down | GO:0004497 | 0,011860413 | monooxygenase activity |
| Δwc2 | 12-day | 2623115 | down | GO:0004497 | 0,011860413 | monooxygenase activity |
| Δwc2 | 12-day | 2623122 | down | GO:0004497 | 0,011860413 | monooxygenase activity |
| Δwc2 | 12-day | 2623196 | down | GO:0004497 | 0,011860413 | monooxygenase activity |
| Δwc2 | 12-day | 2628312 | down | GO:0004497 | 0,011860413 | monooxygenase activity |
| Δwc2 | 12-day | 2628645 | down | GO:0004497 | 0,011860413 | monooxygenase activity |
| Δwc2 | 12-day | 2628651 | down | GO:0004497 | 0,011860413 | monooxygenase activity |
| Δwc2 | 12-day | 2629864 | down | GO:0004497 | 0,011860413 | monooxygenase activity |
| Δwc2 | 12-day | 2632925 | down | GO:0004497 | 0,011860413 | monooxygenase activity |
| Δwc2 | 12-day | 2633776 | down | GO:0004497 | 0,011860413 | monooxygenase activity |
| Δwc2 | 12-day | 2634283 | down | GO:0004497 | 0,011860413 | monooxygenase activity |
| Δwc2 | 12-day | 2635487 | down | GO:0004497 | 0,011860413 | monooxygenase activity |
| Δwc2 | 12-day | 2635869 | down | GO:0004497 | 0,011860413 | monooxygenase activity |
| Δwc2 | 12-day | 2636544 | down | GO:0004497 | 0,011860413 | monooxygenase activity |
| Δwc2 | 12-day | 2638355 | down | GO:0004497 | 0,011860413 | monooxygenase activity |
| Δwc2 | 12-day | 2644430 | down | GO:0004497 | 0,011860413 | monooxygenase activity |
| Δwc2 | 12-day | 2668568 | down | GO:0004497 | 0,011860413 | monooxygenase activity |
| Δwc2 | 12-day | 2703628 | down | GO:0004497 | 0,011860413 | monooxygenase activity |
| Δwc2 | 12-day | 2703966 | down | GO:0004497 | 0,011860413 | monooxygenase activity |
| Δwc2 | 12-day | 2735179 | down | GO:0004497 | 0,011860413 | monooxygenase activity |
| Δwc2 | 12-day | 52195   | down | GO:0005524 | 0,012210054 | ATP binding            |
| Δwc2 | 12-day | 1165803 | down | GO:0005524 | 0,012210054 | ATP binding            |
| Δwc2 | 12-day | 1169398 | down | GO:0005524 | 0,012210054 | ATP binding            |
| Δwc2 | 12-day | 1184723 | down | GO:0005524 | 0,012210054 | ATP binding            |
| Δwc2 | 12-day | 1284934 | down | GO:0005524 | 0,012210054 | ATP binding            |
| Δwc2 | 12-day | 2018969 | down | GO:0005524 | 0,012210054 | ATP binding            |
| Δwc2 | 12-day | 2459580 | down | GO:0005524 | 0,012210054 | ATP binding            |
| Δwc2 | 12-day | 2482187 | down | GO:0005524 | 0,012210054 | ATP binding            |
| Δwc2 | 12-day | 2482745 | down | GO:0005524 | 0,012210054 | ATP binding            |
| Δwc2 | 12-day | 2493870 | down | GO:0005524 | 0,012210054 | ATP binding            |
| Δwc2 | 12-day | 2512873 | down | GO:0005524 | 0,012210054 | ATP binding            |
| Δwc2 | 12-day | 2563608 | down | GO:0005524 | 0,012210054 | ATP binding            |
| Δwc2 | 12-day | 2614908 | down | GO:0005524 | 0,012210054 | ATP binding            |
| Δwc2 | 12-day | 2615950 | down | GO:0005524 | 0,012210054 | ATP binding            |

|      |        |         |      |            |             |                                               |
|------|--------|---------|------|------------|-------------|-----------------------------------------------|
| Δwc2 | 12-day | 2616602 | down | GO:0005524 | 0,012210054 | ATP binding                                   |
| Δwc2 | 12-day | 2617727 | down | GO:0005524 | 0,012210054 | ATP binding                                   |
| Δwc2 | 12-day | 2618609 | down | GO:0005524 | 0,012210054 | ATP binding                                   |
| Δwc2 | 12-day | 2619461 | down | GO:0005524 | 0,012210054 | ATP binding                                   |
| Δwc2 | 12-day | 2621581 | down | GO:0005524 | 0,012210054 | ATP binding                                   |
| Δwc2 | 12-day | 2636914 | down | GO:0005524 | 0,012210054 | ATP binding                                   |
| Δwc2 | 12-day | 2637190 | down | GO:0005524 | 0,012210054 | ATP binding                                   |
| Δwc2 | 12-day | 2642188 | down | GO:0005524 | 0,012210054 | ATP binding                                   |
| Δwc2 | 12-day | 2664859 | down | GO:0005524 | 0,012210054 | ATP binding                                   |
| Δwc2 | 12-day | 2683832 | down | GO:0005524 | 0,012210054 | ATP binding                                   |
| Δwc2 | 12-day | 2690708 | down | GO:0005524 | 0,012210054 | ATP binding                                   |
| Δwc2 | 12-day | 2695418 | down | GO:0005524 | 0,012210054 | ATP binding                                   |
| Δwc2 | 12-day | 2702315 | down | GO:0005524 | 0,012210054 | ATP binding                                   |
| Δwc2 | 12-day | 2748506 | down | GO:0005524 | 0,012210054 | ATP binding                                   |
| Δwc2 | 12-day | 2628225 | down | GO:0005199 | 0,015745001 | structural constituent of cell wall           |
| Δwc2 | 12-day | 2629603 | down | GO:0005199 | 0,015745001 | structural constituent of cell wall           |
| Δwc2 | 12-day | 2629632 | down | GO:0005199 | 0,015745001 | structural constituent of cell wall           |
| Δwc2 | 12-day | 2746250 | down | GO:0005199 | 0,015745001 | structural constituent of cell wall           |
| Δwc2 | 12-day | 2514012 | down | GO:0006865 | 0,016123014 | amino acid transport                          |
| Δwc2 | 12-day | 2514012 | down | GO:0015171 | 0,016123014 | amino acid transmembrane transporter activity |
| Δwc2 | 12-day | 2068434 | down | GO:0030170 | 0,016261102 | pyridoxal phosphate binding                   |
| Δwc2 | 12-day | 2553610 | down | GO:0030170 | 0,016261102 | pyridoxal phosphate binding                   |
| Δwc2 | 12-day | 2608099 | down | GO:0030170 | 0,016261102 | pyridoxal phosphate binding                   |
| Δwc2 | 12-day | 2623956 | down | GO:0030170 | 0,016261102 | pyridoxal phosphate binding                   |
| Δwc2 | 12-day | 2614257 | down | GO:0005618 | 0,020523197 | cell wall                                     |
| Δwc2 | 12-day | 2628225 | down | GO:0005618 | 0,020523197 | cell wall                                     |
| Δwc2 | 12-day | 2629603 | down | GO:0005618 | 0,020523197 | cell wall                                     |
| Δwc2 | 12-day | 2629632 | down | GO:0005618 | 0,020523197 | cell wall                                     |
| Δwc2 | 12-day | 1144263 | down | GO:0005215 | 0,023675553 | transporter activity                          |
| Δwc2 | 12-day | 1153136 | down | GO:0005215 | 0,023675553 | transporter activity                          |
| Δwc2 | 12-day | 1154281 | down | GO:0005215 | 0,023675553 | transporter activity                          |
| Δwc2 | 12-day | 1357952 | down | GO:0005215 | 0,023675553 | transporter activity                          |
| Δwc2 | 12-day | 2122325 | down | GO:0005215 | 0,023675553 | transporter activity                          |
| Δwc2 | 12-day | 2138287 | down | GO:0005215 | 0,023675553 | transporter activity                          |

|      |        |         |      |            |             |                      |
|------|--------|---------|------|------------|-------------|----------------------|
| Δwc2 | 12-day | 2162840 | down | GO:0005215 | 0,023675553 | transporter activity |
| Δwc2 | 12-day | 2481653 | down | GO:0005215 | 0,023675553 | transporter activity |
| Δwc2 | 12-day | 2492878 | down | GO:0005215 | 0,023675553 | transporter activity |
| Δwc2 | 12-day | 2494144 | down | GO:0005215 | 0,023675553 | transporter activity |
| Δwc2 | 12-day | 2520877 | down | GO:0005215 | 0,023675553 | transporter activity |
| Δwc2 | 12-day | 2525305 | down | GO:0005215 | 0,023675553 | transporter activity |
| Δwc2 | 12-day | 2600551 | down | GO:0005215 | 0,023675553 | transporter activity |
| Δwc2 | 12-day | 2607025 | down | GO:0005215 | 0,023675553 | transporter activity |
| Δwc2 | 12-day | 2607891 | down | GO:0005215 | 0,023675553 | transporter activity |
| Δwc2 | 12-day | 2608678 | down | GO:0005215 | 0,023675553 | transporter activity |
| Δwc2 | 12-day | 2611816 | down | GO:0005215 | 0,023675553 | transporter activity |
| Δwc2 | 12-day | 2613255 | down | GO:0005215 | 0,023675553 | transporter activity |
| Δwc2 | 12-day | 2619645 | down | GO:0005215 | 0,023675553 | transporter activity |
| Δwc2 | 12-day | 2620178 | down | GO:0005215 | 0,023675553 | transporter activity |
| Δwc2 | 12-day | 2620830 | down | GO:0005215 | 0,023675553 | transporter activity |
| Δwc2 | 12-day | 2621828 | down | GO:0005215 | 0,023675553 | transporter activity |
| Δwc2 | 12-day | 2622598 | down | GO:0005215 | 0,023675553 | transporter activity |
| Δwc2 | 12-day | 2623420 | down | GO:0005215 | 0,023675553 | transporter activity |
| Δwc2 | 12-day | 2623492 | down | GO:0005215 | 0,023675553 | transporter activity |
| Δwc2 | 12-day | 2626803 | down | GO:0005215 | 0,023675553 | transporter activity |
| Δwc2 | 12-day | 2627703 | down | GO:0005215 | 0,023675553 | transporter activity |
| Δwc2 | 12-day | 2628751 | down | GO:0005215 | 0,023675553 | transporter activity |
| Δwc2 | 12-day | 2629091 | down | GO:0005215 | 0,023675553 | transporter activity |
| Δwc2 | 12-day | 2629455 | down | GO:0005215 | 0,023675553 | transporter activity |
| Δwc2 | 12-day | 2636597 | down | GO:0005215 | 0,023675553 | transporter activity |
| Δwc2 | 12-day | 2637509 | down | GO:0005215 | 0,023675553 | transporter activity |
| Δwc2 | 12-day | 2640951 | down | GO:0005215 | 0,023675553 | transporter activity |
| Δwc2 | 12-day | 2642018 | down | GO:0005215 | 0,023675553 | transporter activity |
| Δwc2 | 12-day | 2642553 | down | GO:0005215 | 0,023675553 | transporter activity |
| Δwc2 | 12-day | 2661224 | down | GO:0005215 | 0,023675553 | transporter activity |
| Δwc2 | 12-day | 2701571 | down | GO:0005215 | 0,023675553 | transporter activity |
| Δwc2 | 12-day | 2712060 | down | GO:0005215 | 0,023675553 | transporter activity |
| Δwc2 | 12-day | 2738153 | down | GO:0005215 | 0,023675553 | transporter activity |
| Δwc2 | 12-day | 2577992 | down | GO:0004194 | 0,02444899  | pepsin A activity    |



|      |        |         |      |            |             |                   |
|------|--------|---------|------|------------|-------------|-------------------|
| Δwc2 | 12-day | 2613917 | down | GO:0004194 | 0,02444899  | pepsin A activity |
| Δwc2 | 12-day | 2616949 | down | GO:0004194 | 0,02444899  | pepsin A activity |
| Δwc2 | 12-day | 2616991 | down | GO:0004194 | 0,02444899  | pepsin A activity |
| Δwc2 | 12-day | 2619340 | down | GO:0004194 | 0,02444899  | pepsin A activity |
| Δwc2 | 12-day | 2619343 | down | GO:0004194 | 0,02444899  | pepsin A activity |
| Δwc2 | 12-day | 78628   | down | GO:0020037 | 0,026908024 | heme binding      |
| Δwc2 | 12-day | 81631   | down | GO:0020037 | 0,026908024 | heme binding      |
| Δwc2 | 12-day | 1131542 | down | GO:0020037 | 0,026908024 | heme binding      |
| Δwc2 | 12-day | 1189794 | down | GO:0020037 | 0,026908024 | heme binding      |
| Δwc2 | 12-day | 1193647 | down | GO:0020037 | 0,026908024 | heme binding      |
| Δwc2 | 12-day | 2327903 | down | GO:0020037 | 0,026908024 | heme binding      |
| Δwc2 | 12-day | 2376858 | down | GO:0020037 | 0,026908024 | heme binding      |
| Δwc2 | 12-day | 2484868 | down | GO:0020037 | 0,026908024 | heme binding      |
| Δwc2 | 12-day | 2486680 | down | GO:0020037 | 0,026908024 | heme binding      |
| Δwc2 | 12-day | 2497674 | down | GO:0020037 | 0,026908024 | heme binding      |
| Δwc2 | 12-day | 2507891 | down | GO:0020037 | 0,026908024 | heme binding      |
| Δwc2 | 12-day | 2510129 | down | GO:0020037 | 0,026908024 | heme binding      |
| Δwc2 | 12-day | 2510618 | down | GO:0020037 | 0,026908024 | heme binding      |
| Δwc2 | 12-day | 2512276 | down | GO:0020037 | 0,026908024 | heme binding      |
| Δwc2 | 12-day | 2583618 | down | GO:0020037 | 0,026908024 | heme binding      |
| Δwc2 | 12-day | 2604096 | down | GO:0020037 | 0,026908024 | heme binding      |
| Δwc2 | 12-day | 2604231 | down | GO:0020037 | 0,026908024 | heme binding      |
| Δwc2 | 12-day | 2604458 | down | GO:0020037 | 0,026908024 | heme binding      |
| Δwc2 | 12-day | 2604628 | down | GO:0020037 | 0,026908024 | heme binding      |
| Δwc2 | 12-day | 2604735 | down | GO:0020037 | 0,026908024 | heme binding      |
| Δwc2 | 12-day | 2609840 | down | GO:0020037 | 0,026908024 | heme binding      |
| Δwc2 | 12-day | 2611234 | down | GO:0020037 | 0,026908024 | heme binding      |
| Δwc2 | 12-day | 2614998 | down | GO:0020037 | 0,026908024 | heme binding      |
| Δwc2 | 12-day | 2616301 | down | GO:0020037 | 0,026908024 | heme binding      |
| Δwc2 | 12-day | 2619674 | down | GO:0020037 | 0,026908024 | heme binding      |
| Δwc2 | 12-day | 2621855 | down | GO:0020037 | 0,026908024 | heme binding      |
| Δwc2 | 12-day | 2623115 | down | GO:0020037 | 0,026908024 | heme binding      |
| Δwc2 | 12-day | 2623122 | down | GO:0020037 | 0,026908024 | heme binding      |
| Δwc2 | 12-day | 2623196 | down | GO:0020037 | 0,026908024 | heme binding      |

|      |        |         |      |            |             |                         |
|------|--------|---------|------|------------|-------------|-------------------------|
| Δwc2 | 12-day | 2624504 | down | GO:0020037 | 0,026908024 | heme binding            |
| Δwc2 | 12-day | 2628312 | down | GO:0020037 | 0,026908024 | heme binding            |
| Δwc2 | 12-day | 2628645 | down | GO:0020037 | 0,026908024 | heme binding            |
| Δwc2 | 12-day | 2628651 | down | GO:0020037 | 0,026908024 | heme binding            |
| Δwc2 | 12-day | 2629864 | down | GO:0020037 | 0,026908024 | heme binding            |
| Δwc2 | 12-day | 2632925 | down | GO:0020037 | 0,026908024 | heme binding            |
| Δwc2 | 12-day | 2633776 | down | GO:0020037 | 0,026908024 | heme binding            |
| Δwc2 | 12-day | 2634283 | down | GO:0020037 | 0,026908024 | heme binding            |
| Δwc2 | 12-day | 2635487 | down | GO:0020037 | 0,026908024 | heme binding            |
| Δwc2 | 12-day | 2635869 | down | GO:0020037 | 0,026908024 | heme binding            |
| Δwc2 | 12-day | 2636544 | down | GO:0020037 | 0,026908024 | heme binding            |
| Δwc2 | 12-day | 2637190 | down | GO:0020037 | 0,026908024 | heme binding            |
| Δwc2 | 12-day | 2638355 | down | GO:0020037 | 0,026908024 | heme binding            |
| Δwc2 | 12-day | 2668568 | down | GO:0020037 | 0,026908024 | heme binding            |
| Δwc2 | 12-day | 2703628 | down | GO:0020037 | 0,026908024 | heme binding            |
| Δwc2 | 12-day | 2703966 | down | GO:0020037 | 0,026908024 | heme binding            |
| Δwc2 | 12-day | 2704129 | down | GO:0020037 | 0,026908024 | heme binding            |
| Δwc2 | 12-day | 2735179 | down | GO:0020037 | 0,026908024 | heme binding            |
| Δwc2 | 12-day | 2285680 | down | GO:0006629 | 0,030389288 | lipid metabolic process |
| Δwc2 | 12-day | 2376858 | down | GO:0006629 | 0,030389288 | lipid metabolic process |
| Δwc2 | 12-day | 2641759 | down | GO:0006629 | 0,030389288 | lipid metabolic process |
| Δwc2 | 12-day | 1036421 | down | GO:0016021 | 0,039729267 | integral to membrane    |
| Δwc2 | 12-day | 1038608 | down | GO:0016021 | 0,039729267 | integral to membrane    |
| Δwc2 | 12-day | 1144263 | down | GO:0016021 | 0,039729267 | integral to membrane    |
| Δwc2 | 12-day | 1147332 | down | GO:0016021 | 0,039729267 | integral to membrane    |
| Δwc2 | 12-day | 1153136 | down | GO:0016021 | 0,039729267 | integral to membrane    |
| Δwc2 | 12-day | 1154281 | down | GO:0016021 | 0,039729267 | integral to membrane    |
| Δwc2 | 12-day | 1172581 | down | GO:0016021 | 0,039729267 | integral to membrane    |
| Δwc2 | 12-day | 1186839 | down | GO:0016021 | 0,039729267 | integral to membrane    |
| Δwc2 | 12-day | 2122325 | down | GO:0016021 | 0,039729267 | integral to membrane    |
| Δwc2 | 12-day | 2138287 | down | GO:0016021 | 0,039729267 | integral to membrane    |
| Δwc2 | 12-day | 2481653 | down | GO:0016021 | 0,039729267 | integral to membrane    |
| Δwc2 | 12-day | 2483267 | down | GO:0016021 | 0,039729267 | integral to membrane    |
| Δwc2 | 12-day | 2494144 | down | GO:0016021 | 0,039729267 | integral to membrane    |

|      |        |         |      |            |             |                      |
|------|--------|---------|------|------------|-------------|----------------------|
| Δwc2 | 12-day | 2503108 | down | GO:0016021 | 0,039729267 | integral to membrane |
| Δwc2 | 12-day | 2514012 | down | GO:0016021 | 0,039729267 | integral to membrane |
| Δwc2 | 12-day | 2524870 | down | GO:0016021 | 0,039729267 | integral to membrane |
| Δwc2 | 12-day | 2525305 | down | GO:0016021 | 0,039729267 | integral to membrane |
| Δwc2 | 12-day | 2572308 | down | GO:0016021 | 0,039729267 | integral to membrane |
| Δwc2 | 12-day | 2604984 | down | GO:0016021 | 0,039729267 | integral to membrane |
| Δwc2 | 12-day | 2607025 | down | GO:0016021 | 0,039729267 | integral to membrane |
| Δwc2 | 12-day | 2607891 | down | GO:0016021 | 0,039729267 | integral to membrane |
| Δwc2 | 12-day | 2608678 | down | GO:0016021 | 0,039729267 | integral to membrane |
| Δwc2 | 12-day | 2611612 | down | GO:0016021 | 0,039729267 | integral to membrane |
| Δwc2 | 12-day | 2611816 | down | GO:0016021 | 0,039729267 | integral to membrane |
| Δwc2 | 12-day | 2613255 | down | GO:0016021 | 0,039729267 | integral to membrane |
| Δwc2 | 12-day | 2616602 | down | GO:0016021 | 0,039729267 | integral to membrane |
| Δwc2 | 12-day | 2619645 | down | GO:0016021 | 0,039729267 | integral to membrane |
| Δwc2 | 12-day | 2620178 | down | GO:0016021 | 0,039729267 | integral to membrane |
| Δwc2 | 12-day | 2620830 | down | GO:0016021 | 0,039729267 | integral to membrane |
| Δwc2 | 12-day | 2621828 | down | GO:0016021 | 0,039729267 | integral to membrane |
| Δwc2 | 12-day | 2622598 | down | GO:0016021 | 0,039729267 | integral to membrane |
| Δwc2 | 12-day | 2623420 | down | GO:0016021 | 0,039729267 | integral to membrane |
| Δwc2 | 12-day | 2623492 | down | GO:0016021 | 0,039729267 | integral to membrane |
| Δwc2 | 12-day | 2626803 | down | GO:0016021 | 0,039729267 | integral to membrane |
| Δwc2 | 12-day | 2627703 | down | GO:0016021 | 0,039729267 | integral to membrane |
| Δwc2 | 12-day | 2629091 | down | GO:0016021 | 0,039729267 | integral to membrane |
| Δwc2 | 12-day | 2629455 | down | GO:0016021 | 0,039729267 | integral to membrane |
| Δwc2 | 12-day | 2636597 | down | GO:0016021 | 0,039729267 | integral to membrane |
| Δwc2 | 12-day | 2637190 | down | GO:0016021 | 0,039729267 | integral to membrane |
| Δwc2 | 12-day | 2637509 | down | GO:0016021 | 0,039729267 | integral to membrane |
| Δwc2 | 12-day | 2638261 | down | GO:0016021 | 0,039729267 | integral to membrane |
| Δwc2 | 12-day | 2641709 | down | GO:0016021 | 0,039729267 | integral to membrane |
| Δwc2 | 12-day | 2642018 | down | GO:0016021 | 0,039729267 | integral to membrane |
| Δwc2 | 12-day | 2663372 | down | GO:0016021 | 0,039729267 | integral to membrane |
| Δwc2 | 12-day | 2667661 | down | GO:0016021 | 0,039729267 | integral to membrane |
| Δwc2 | 12-day | 2686473 | down | GO:0016021 | 0,039729267 | integral to membrane |
| Δwc2 | 12-day | 2691538 | down | GO:0016021 | 0,039729267 | integral to membrane |

|              |        |         |      |            |             |                                                  |
|--------------|--------|---------|------|------------|-------------|--------------------------------------------------|
| $\Delta wc2$ | 12-day | 2701571 | down | GO:0016021 | 0,039729267 | integral to membrane                             |
| $\Delta wc2$ | 12-day | 2704867 | down | GO:0016021 | 0,039729267 | integral to membrane                             |
| $\Delta wc2$ | 12-day | 2712060 | down | GO:0016021 | 0,039729267 | integral to membrane                             |
| $\Delta wc2$ | 12-day | 2376858 | down | GO:0016717 | 0,048950793 | oxidoreductase activity, acting on paired donors |

**Supplementary Table S4.** Impact of deletion of transcription factor genes on whole genome expression. Enrichment of GO terms in up- and downregulated genes of 12-day-old colonies of  $\Delta wc-1\Delta wc-1$  and transcription factor deletion strains  $\Delta wc-2\Delta wc-2$ ,  $\Delta hom2\Delta hom2$ ,  $\Delta fst4\Delta fst4$ ,  $\Delta c2h2\Delta c2h2$ ,  $\Delta fst3\Delta fst3$ ,  $\Delta hom1\Delta hom1$ ,  $\Delta gat1\Delta gat1$ , and  $\Delta bril\Delta bril$  when compared to the fruiting wild-type strain. Analysis is based on biological duplicates.

| <b><math>\Delta wc-1\Delta wc-1</math></b> |                                                                 |                                       |                               |
|--------------------------------------------|-----------------------------------------------------------------|---------------------------------------|-------------------------------|
| Up-regulated genes in mutant strain        |                                                                 | Down-regulated genes in mutant strain |                               |
| GO term                                    | Functional annotation                                           | GO term                               | Functional annotation         |
| 0005506                                    | iron ion binding                                                | 0008152                               | metabolic process             |
| 0020037                                    | heme binding                                                    | 0016491                               | oxidoreductase activity       |
| 0004497                                    | monooxygenase activity                                          | 0000786                               | nucleosome                    |
| 0006118                                    | electron transport                                              | 0006334                               | nucleosome assembly           |
| 0050381                                    | unspecific monooxygenase activity                               | 0003824                               | catalytic activity            |
| 0005975                                    | carbohydrate metabolic process                                  | 0006810                               | transport                     |
| 0004553                                    | hydrolase activity, hydrolyzing O-glycosyl compounds            | 0016020                               | membrane                      |
| 0005524                                    | ATP binding                                                     | 0004497                               | monooxygenase activity        |
| 0005215                                    | transporter activity                                            | 0016021                               | integral to membrane          |
| 0016810                                    | hydrolase activity, acting on carbon-nitrogen (but not peptide) | 0006118                               | electron transport            |
| <b><math>\Delta wc-2\Delta wc-2</math></b> |                                                                 |                                       |                               |
| Up-regulated genes in mutant strain        |                                                                 | Down-regulated genes in mutant strain |                               |
| GO term                                    | Functional annotation                                           | GO term                               | Functional annotation         |
| 0020037                                    | heme binding                                                    | 0000786                               | nucleosome                    |
| 0005506                                    | iron ion binding                                                | 0006334                               | nucleosome assembly           |
| 0004497                                    | monooxygenase activity                                          | 0003677                               | DNA binding                   |
| 0050381                                    | unspecific monooxygenase activity                               | 0003824                               | catalytic activity            |
| 0005975                                    | carbohydrate metabolic process                                  | 0008152                               | metabolic process             |
| 0006118                                    | electron transport                                              | 0006260                               | DNA replication               |
| 0004553                                    | hydrolase activity, hydrolyzing O-glycosyl compounds            | 0042624                               | ATPase activity, uncoupled    |
| 0005215                                    | transporter activity                                            | 0016491                               | oxidoreductase activity       |
| 0005524                                    | ATP binding                                                     | 0042623                               | ATPase activity, coupled      |
| 0006032                                    | chitin catabolic process                                        | 0008186                               | RNA-dependent ATPase activity |
| <b><math>\Delta hom2\Delta hom2</math></b> |                                                                 |                                       |                               |
| Up-regulated genes in mutant strain        |                                                                 | Down-regulated genes in mutant strain |                               |
| GO term                                    | Functional annotation                                           | GO term                               | Functional annotation         |

|         |                                                      |         |                                               |
|---------|------------------------------------------------------|---------|-----------------------------------------------|
| 0003735 | structural constituent of ribosome                   | 0006810 | transport                                     |
| 0005840 | ribosome                                             | 0005215 | transporter activity                          |
| 0006412 | translation                                          | 0008152 | metabolic process                             |
| 0005975 | carbohydrate metabolic process                       | 0016020 | membrane                                      |
| 0005506 | iron ion binding                                     | 0016021 | integral to membrane                          |
| 0020037 | heme binding                                         | 0016491 | oxidoreductase activity                       |
| 0004553 | hydrolase activity, hydrolyzing O-glycosyl compounds | 0003824 | catalytic activity                            |
| 0005622 | intracellular                                        | 0006865 | amino acid transport                          |
| 0004497 | monooxygenase activity                               | 0015171 | amino acid transmembrane transporter activity |
| 0006118 | electron transport                                   | 0004497 | monooxygenase activity                        |

***Δfst4Δfst4***

| Up-regulated genes in mutant strain |                                                      | Down-regulated genes in mutant strain |                                     |
|-------------------------------------|------------------------------------------------------|---------------------------------------|-------------------------------------|
| GO term                             | Functional annotation                                | GO term                               | Functional annotation               |
| 0005975                             | carbohydrate metabolic process                       | 0016491                               | oxidoreductase activity             |
| 0005215                             | transporter activity                                 | 0008152                               | metabolic process                   |
| 0006508                             | proteolysis                                          | 0003824                               | catalytic activity                  |
| 0005506                             | iron ion binding                                     | 0000786                               | nucleosome                          |
| 0020037                             | heme binding                                         | 0030170                               | pyridoxal phosphate binding         |
| 0050381                             | unspecific monooxygenase activity                    | 0006334                               | nucleosome assembly                 |
| 0004553                             | hydrolase activity, hydrolyzing O-glycosyl compounds | 0006118                               | electron transport                  |
| 0004497                             | monooxygenase activity                               | 0006810                               | transport                           |
| 0006118                             | electron transport                                   | 0008483                               | transaminase activity               |
| 0008236                             | serine-type peptidase activity                       | 0005199                               | structural constituent of cell wall |

***Δc2h2Δc2h2***

| Up-regulated genes in mutant strain |                                 | Down-regulated genes in mutant strain |                                     |
|-------------------------------------|---------------------------------|---------------------------------------|-------------------------------------|
| GO term                             | Functional annotation           | GO term                               | Functional annotation               |
| 0005506                             | iron ion binding                | 0003824                               | catalytic activity                  |
| 0020037                             | heme binding                    | 0008152                               | metabolic process                   |
| 0004497                             | monooxygenase activity          | 0030170                               | pyridoxal phosphate binding         |
| 0006118                             | electron transport              | 0005199                               | structural constituent of cell wall |
| 0050381                             | unspecic monooxygenase activity | 0005618                               | cell wall                           |

|         |                                                      |         |                                                     |
|---------|------------------------------------------------------|---------|-----------------------------------------------------|
| 0016711 | flavonoid 3'-monooxygenase activity                  | 0005992 | trehalose biosynthetic process                      |
| 0004553 | hydrolase activity, hydrolyzing O-glycosyl compounds | 0005488 | binding                                             |
| 0005975 | hydrolase activity, hydrolyzing O-glycosyl compounds | 0004316 | 3-oxoacyl-[acyl-carrier-protein] reductase activity |
| 0006032 | carbohydrate metabolic process                       | 0033754 | indoleamine 2,3-dioxygenase activity                |
| 0005618 | chitin catabolic process                             | 0006164 | purine nucleotide biosynthetic process              |

***Δfst3Δfst3***

| Up-regulated genes in mutant strain |                                                        | Down-regulated genes in mutant strain |                                                      |
|-------------------------------------|--------------------------------------------------------|---------------------------------------|------------------------------------------------------|
| GO term                             | Functional annotation                                  | GO term                               | Functional annotation                                |
| 0004565                             | beta-galactosidase activity                            | 0004568                               | chitinase activity                                   |
| 0009341                             | beta-galactosidase complex                             | 0008843                               | endochitinase activity                               |
| 0008168                             | methyltransferase activity                             | 0005576                               | extracellular region                                 |
| 0005975                             | carbohydrate metabolic process                         | 0004553                               | hydrolase activity, hydrolyzing O-glycosyl compounds |
| 0009316                             | 3-isopropylmalate dehydratase complex                  | 0006032                               | chitin catabolic process                             |
| 0003861                             | 3-isopropylmalate dehydratase activity                 | 0005199                               | structural constituent of cell wall                  |
| 0004035                             | alkaline phosphatase activity                          | 0005618                               | cell wall                                            |
| 0005385                             | zinc ion transmembrane transporter activity            | 0030246                               | carbohydrate binding                                 |
| 0006829                             | zinc ion transport                                     | 0050381                               | unspecific monooxygenase activity                    |
| 0005315                             | inorganic phosphate transmembrane transporter activity | 0005975                               | carbohydrate metabolic process                       |

***Δhom1Δhom1***

| Up-regulated genes in mutant strain |                       | Down-regulated genes in mutant strain |                                                     |
|-------------------------------------|-----------------------|---------------------------------------|-----------------------------------------------------|
| GO term                             | Functional annotation | GO term                               | Functional annotation                               |
|                                     | NONE                  | 0003824                               | catalytic activity                                  |
|                                     |                       | 0016491                               | oxidoreductase activity                             |
|                                     |                       | 0004316                               | 3-oxoacyl-[acyl-carrier-protein] reductase activity |
|                                     |                       | 0008152                               | metabolic process                                   |
|                                     |                       | 0006526                               | arginine biosynthetic process                       |
|                                     |                       | 0016021                               | integral to membrane                                |
|                                     |                       | 0003939                               | L-idoitol 2-dehydrogenase activity                  |
|                                     |                       | 0004932                               | mating-type factor pheromone receptor activity      |
|                                     |                       | 0003991                               | acetylglutamate kinase activity                     |
|                                     |                       | 0004358                               | glutamate N-acetyltransferase activity              |

***Δgat1Δgat1***

| Up-regulated genes in mutant strain |                                        | Down-regulated genes in mutant strain |                                     |
|-------------------------------------|----------------------------------------|---------------------------------------|-------------------------------------|
| GO term                             | Functional annotation                  | GO term                               | Functional annotation               |
| 0017059                             | serine C-palmitoyltransferase complex  | 0005840                               | ribosome                            |
| 0004758                             | serine C-palmitoyltransferase activity | 0003735                               | structural constituent of ribosome  |
|                                     |                                        | 0006412                               | translation                         |
|                                     |                                        | 0005622                               | intracellular                       |
|                                     |                                        | 0005839                               | proteasome core complex             |
|                                     |                                        | 0005199                               | structural constituent of cell wall |
|                                     |                                        | 0005618                               | cell wall                           |
|                                     |                                        | 0008152                               | metabolic process                   |
|                                     |                                        | 0006118                               | electron transport                  |
|                                     |                                        | 0006526                               | arginine biosynthetic process       |

***Abri1Abri1***

| Up-regulated genes in mutant strain |                       | Down-regulated genes in mutant strain |                                                      |
|-------------------------------------|-----------------------|---------------------------------------|------------------------------------------------------|
| GO term                             | Functional annotation | GO term                               | Functional annotation                                |
|                                     | NONE                  | 0005975                               | carbohydrate metabolic process                       |
|                                     |                       | 0004553                               | hydrolase activity, hydrolyzing O-glycosyl compounds |
|                                     |                       | 0016491                               | oxidoreductase activity                              |
|                                     |                       | 0004364                               | glutathione transferase activity                     |
|                                     |                       | 0005618                               | cell wall                                            |
|                                     |                       | 0003824                               | catalytic activity                                   |
|                                     |                       | 0004568                               | chitinase activity                                   |
|                                     |                       | 0005199                               | structural constituent of cell wall                  |
|                                     |                       | 0008843                               | endochitinase activity                               |
|                                     |                       | 0016564                               | transcription repressor activity                     |



**Supplementary Table S5.** Impact of deletion of transcription factor genes on other transcription factor genes. ProteinIDs and annotations of transcription factors significantly up- or downregulated among  $\Delta hom1$ ,  $\Delta gat1$  and  $\Delta fst3$  at fruiting body stage and among  $\Delta wc-2$ ,  $\Delta hom2$  and  $\Delta fst4$  at aggregate stage. Analysis is based on biological duplicates.

| <b>Fruiting Body</b>                                                                      |                        |                                 |                                            |                                 |                        |
|-------------------------------------------------------------------------------------------|------------------------|---------------------------------|--------------------------------------------|---------------------------------|------------------------|
| <b>UPREGULATED</b>                                                                        |                        |                                 |                                            |                                 |                        |
| <b><math>\Delta hom1</math></b>                                                           |                        | <b><math>\Delta gat1</math></b> |                                            | <b><math>\Delta fst3</math></b> |                        |
| 2609438                                                                                   | Zinc finger, C2H2-type | 2631700                         | Zn2Cys6                                    | <b>2622753</b>                  | Zn2Cys6                |
|                                                                                           |                        | 2568997                         | Dimeric alpha-beta barrel                  | <b>2641338</b>                  | Zinc finger, C2H2-type |
|                                                                                           |                        | <b>2686461</b>                  | High mobility group box, HMG1/HMG2         | 2605931                         | Zn2Cys6                |
|                                                                                           |                        | <b>2529565</b>                  | Fork head                                  | 2644742                         | Zinc finger, C2H2-type |
|                                                                                           |                        | 1163017                         | ABC transporter/<br>Zinc finger, C2H2-type |                                 |                        |
|                                                                                           |                        | <b>1183987</b>                  | Forkhead                                   |                                 |                        |
|                                                                                           |                        | 2693949                         | Homeodomain                                |                                 |                        |
|                                                                                           |                        | <b>2585708</b>                  | Zinc Finger                                |                                 |                        |
|                                                                                           |                        | 1201831                         | Zn2Cys6                                    |                                 |                        |
|                                                                                           |                        | <b>2743676</b>                  | Zinc finger, C2H2-type                     |                                 |                        |
|                                                                                           |                        | <b>2511560</b>                  | Zinc finger, C2H2-type                     |                                 |                        |
|                                                                                           |                        | 2526629                         | Homeodomain                                |                                 |                        |
|                                                                                           |                        | 2690968                         | Nuclease                                   |                                 |                        |
|                                                                                           |                        | <b>2687474</b>                  | Zinc finger, C2H2-type                     |                                 |                        |
|                                                                                           |                        | <b>2604883</b>                  | Zinc finger, C2H2-type                     |                                 |                        |
|                                                                                           |                        | <b>2520583</b>                  | Zinc finger, C2H2-type                     |                                 |                        |
|                                                                                           |                        | 2629777                         | Zinc finger, C2H2-type                     |                                 |                        |
|                                                                                           |                        | <b>2674381</b>                  | Fungal specific transcription factor       |                                 |                        |
| <b><math>\Delta hom1</math> and <math>\Delta gat1</math></b>                              |                        |                                 |                                            |                                 |                        |
|                                                                                           | 2481568                |                                 |                                            |                                 | TEA/ATTS               |
|                                                                                           | <b>2625140</b>         |                                 |                                            |                                 | APSES                  |
|                                                                                           | <b>2594118</b>         |                                 |                                            |                                 | Zinc finger, C2H2-type |
|                                                                                           | <b>2668745</b>         |                                 |                                            |                                 | Homeodomain            |
|                                                                                           | 2524459                |                                 |                                            |                                 | Zn2Cys6                |
|                                                                                           | 2667924                |                                 |                                            |                                 | Zinc finger, C2H2-type |
|                                                                                           | <b>1157466</b>         |                                 |                                            |                                 | Basic-leucine zipper   |
|                                                                                           | 2533051                |                                 |                                            |                                 | Zn2Cys6                |
|                                                                                           | 2686265                |                                 |                                            |                                 | Zinc finger, C2H2-type |
|                                                                                           | <b>2493743</b>         |                                 |                                            |                                 | Zn2Cys6                |
| <b><math>\Delta hom1</math> and <math>\Delta gat1</math> and <math>\Delta fst3</math></b> |                        |                                 |                                            |                                 |                        |
|                                                                                           | 2621155                |                                 |                                            |                                 | HMG-I/HMG-Y            |
| <b>DOWNREGULATED</b>                                                                      |                        |                                 |                                            |                                 |                        |
| <b><math>\Delta hom1</math></b>                                                           |                        | <b><math>\Delta gat1</math></b> |                                            | <b><math>\Delta fst3</math></b> |                        |
| 2603970                                                                                   | Homeodomain            | 2634258                         | GHMP kinase                                | <b>2629275</b>                  | Zn2Cys6                |
|                                                                                           |                        | 2617618                         | Zinc finger, C2H2-type                     |                                 |                        |
|                                                                                           |                        | <b>2635354</b>                  | TEA/ATTS                                   |                                 |                        |

|  |                |                                                          |  |
|--|----------------|----------------------------------------------------------|--|
|  | 2605931        | Zn2Cys6                                                  |  |
|  | 2516476        | Zinc finger, C2H2-type                                   |  |
|  | 2625706        | Cyanate lyase / lambda repressor-like DNA binding domain |  |
|  | 2517503        | High mobility group box, HMG1/HMG2                       |  |
|  | <b>2634413</b> | LAG1                                                     |  |
|  | <b>2045557</b> | High mobility group box, HMG1/HMG2                       |  |
|  | 2619914        | Zinc finger, C2H2-type                                   |  |
|  | <b>2665755</b> | Zinc finger, C2H2-type                                   |  |
|  | <b>2635786</b> | Helix-turn-helix, AraC type                              |  |
|  | <b>269971</b>  | Zinc finger, C2H2-type                                   |  |
|  | 2642686        | Zinc finger, C2H2-type                                   |  |
|  | 1115145        | Homeodomain                                              |  |
|  | 2646024        | Zinc finger, CCHC                                        |  |
|  | <b>2633839</b> | Zn2Cys6                                                  |  |
|  | 2644742        | Zinc finger, C2H2-type                                   |  |
|  | 2632395        | Zn2Cys6                                                  |  |

***Δgat1 and Δfst3***

|         |                        |
|---------|------------------------|
| 2703923 | Zinc finger, C2H2-type |
|---------|------------------------|

***Δhom1 and Δgat1***

|                |                                      |
|----------------|--------------------------------------|
| 2620880        | Fungal specific transcription factor |
| <b>2629570</b> | Zinc finger, C2H2-type               |
| <b>2608261</b> | High mobility group box, HMG1/HMG2   |
| 2488050        | Zinc finger, C2H2-type               |
| <b>2573899</b> | Zn2Cys6                              |
| 2532312        | Zinc finger, C2H2-type               |

**Aggregate**

**UPREGULATED**

| <b><i>Δwc-2</i></b> | <b><i>Δhom2</i></b>                  | <b><i>Δfst4</i></b>                      |
|---------------------|--------------------------------------|------------------------------------------|
| <b>1095746</b>      | Fungal specific transcription factor | <b>2058879</b>                           |
| <b>2627285</b>      | Zinc finger, C2H2-type               | High mobility group box, HMG1/HMG2       |
| 2633009             |                                      | <b>2645939</b>                           |
| 2488050             | Zinc finger, C2H2-type               | HLH, helix-loop-helix DNA-binding domain |
| <b>2543273</b>      | Zinc finger, CCHC-type               | <b>2548256</b>                           |
| 2686265             | Zinc finger, C2H2-type               | Zn2Cys6                                  |
|                     |                                      | <b>2509453</b>                           |
|                     |                                      | Zinc finger, C2H2-type                   |
|                     |                                      | <b>2662836</b>                           |
|                     |                                      | Zinc finger, C2H2-type                   |
|                     |                                      | <b>2596857</b>                           |
|                     |                                      | Fungal specific transcription factor     |
|                     |                                      | <b>2610822</b>                           |
|                     |                                      | Zinc finger, DHHC-type                   |
|                     |                                      | <b>2515078</b>                           |
|                     |                                      | Zn2Cys6                                  |
|                     |                                      | <b>2703742</b>                           |
|                     |                                      | Zn2Cys6                                  |
|                     |                                      | <b>2642040</b>                           |
|                     |                                      | Fork head transcription factor           |
|                     |                                      | 2632395                                  |
|                     |                                      | Zn2Cys6                                  |

|  |  |                |                                                          |
|--|--|----------------|----------------------------------------------------------|
|  |  | <b>2619245</b> | Zinc finger, C2H2-type                                   |
|  |  | <b>2620175</b> | Zn2Cys6                                                  |
|  |  | <b>2607126</b> | Helix-turn-helix type 3                                  |
|  |  | 2625706        | Cyanate lyase / lambda repressor-like DNA binding domain |
|  |  | <b>2679824</b> | Zinc finger, C2H2-type                                   |
|  |  | 2510481        | Fungal specific transcription factor                     |
|  |  | 2667924        | Zinc finger, C2H2-type                                   |
|  |  | <b>2626375</b> | Zinc finger, C2H2-type                                   |
|  |  | <b>2517617</b> | Zinc finger, C2H2-type                                   |
|  |  | <b>2354220</b> | Zinc finger, C2H2-type                                   |
|  |  | <b>250298</b>  | Zn2Cys6                                                  |
|  |  | <b>2690519</b> | Zinc finger, C2H2-type                                   |
|  |  | <b>1156706</b> | Zn2Cys6                                                  |
|  |  | <b>2627369</b> | HLH, helix-loop-helix DNA-binding domain                 |
|  |  | 2605931        | Zn2Cys6                                                  |
|  |  | <b>2608348</b> | Zn2Cys6                                                  |
|  |  | 2623333        | High mobility group box, HMG1/HMG2                       |
|  |  | <b>2642807</b> | Zinc finger, C2H2-type                                   |
|  |  | <b>1192535</b> | SANT, DNA-binding                                        |
|  |  | <b>248956</b>  | Zinc finger, C2H2-type                                   |
|  |  | <b>2507652</b> | Zinc finger, C2H2-type                                   |
|  |  | <b>2750667</b> | Zinc finger, DHHC-type                                   |
|  |  | <b>2620554</b> | Zinc finger, C2H2-type                                   |
|  |  | <b>2610202</b> | HLH, helix-loop-helix DNA-binding domain                 |
|  |  | <b>2615561</b> | Zn2Cys6                                                  |

***Δwc-2 and Δhom2***

|                |                                                  |
|----------------|--------------------------------------------------|
| <b>2610649</b> | Basic-leucine zipper (bZIP) transcription factor |
| <b>2511242</b> | Zn2Cys6                                          |
| <b>2497230</b> | Zinc finger, C2H2-type                           |
| 2642686        | Zinc finger, C2H2-type                           |
| 2629777        | Zinc finger, C2H2-type                           |
| 1163017        | ABC transporter/ Zinc finger, C2H2-type          |

***Δwc-2 and Δfst4***

|         |                        |
|---------|------------------------|
| 2621155 | HMG-I/HMG-Y            |
| 2532312 | Zinc finger, C2H2-type |
| 2598013 | Zn2Cys6                |

**DOWNREGULATED**

| <b><i>Δwc-2</i></b> | <b><i>Δhom2</i></b>            | <b><i>Δfst4</i></b> |
|---------------------|--------------------------------|---------------------|
| <b>2521386</b>      | Basic-leucine zipper (bZIP)    | <b>2606207</b>      |
|                     | Transcription factor, MADS-box | 2631700             |
|                     |                                | Zn2Cys6             |

|         |                                                          |                |                                                  |                |                                      |
|---------|----------------------------------------------------------|----------------|--------------------------------------------------|----------------|--------------------------------------|
|         | transcription factor                                     |                |                                                  |                |                                      |
| 2533051 | Zn2Cys6                                                  | 2481568        | TEA/ATTS                                         | 2568997        | Dimeric alpha-beta barrel            |
| 2625706 | Cyanate lyase / lambda repressor-like DNA binding domain | 2516476        | Zinc finger, C2H2-type                           | 2603970        | Homeodomain                          |
|         |                                                          | <b>2495664</b> | Zn2Cys6                                          | <b>2628438</b> | HMG-I and HMG-Y, DNA-binding         |
|         |                                                          | <b>2638002</b> | Basic-leucine zipper (bZIP) transcription factor | <b>2489133</b> | HMG-I and HMG-Y, DNA-binding         |
|         |                                                          | 1201831        | Zn2Cys6                                          | <b>2629009</b> | HMG-I and HMG-Y, DNA-binding         |
|         |                                                          | <b>2631376</b> | Basic-leucine zipper (bZIP) transcription factor | <b>2631854</b> | Homeodomain                          |
|         |                                                          | <b>2661334</b> | High mobility group box, HMG                     | 2526629        | Homeodomain                          |
|         |                                                          | 1115145        | Homeodomain                                      | <b>2616011</b> | SANT, DNA-binding                    |
|         |                                                          | <b>2634429</b> | Homeodomain                                      | <b>2624428</b> | Zn2Cys6                              |
|         |                                                          |                |                                                  | <b>2670552</b> | HMG-I and HMG-Y, DNA-binding         |
|         |                                                          |                |                                                  | <b>2666385</b> | HMG-I and HMG-Y, DNA-binding         |
|         |                                                          |                |                                                  | <b>2481326</b> | Jumonji                              |
|         |                                                          |                |                                                  | <b>2499005</b> | Zinc finger, C2H2-type               |
|         |                                                          |                |                                                  | 2609438        | Zinc finger, C2H2-type               |
|         |                                                          |                |                                                  | <b>2197600</b> | Zn2Cys6                              |
|         |                                                          |                |                                                  | 2634258        | GHMP kinase                          |
|         |                                                          |                |                                                  | <b>2551688</b> | HMG-I and HMG-Y, DNA-binding         |
|         |                                                          |                |                                                  | <b>2663071</b> | Zinc finger, CCCH-type               |
|         |                                                          |                |                                                  | <b>2586122</b> | Homeodomain                          |
|         |                                                          |                |                                                  | <b>70520</b>   | Zinc finger, NF-X1-type              |
|         |                                                          |                |                                                  | <b>2496919</b> | Endonuclease                         |
|         |                                                          |                |                                                  | <b>2632356</b> | Homeodomain                          |
|         |                                                          |                |                                                  | <b>250177</b>  | Fungal specific transcription factor |
|         |                                                          |                |                                                  | <b>2558936</b> | Lambda repressor-like, DNA-binding   |
|         |                                                          |                |                                                  | 2619914        | Zinc finger, C2H2-type               |
|         |                                                          |                |                                                  | <b>2495286</b> | SANT, DNA-binding                    |
|         |                                                          |                |                                                  | <b>2665806</b> | Ankyrin                              |
|         |                                                          |                |                                                  | <b>2628233</b> | Zinc finger, TFIIIS-type             |
|         |                                                          |                |                                                  | <b>2513276</b> | Zinc finger, C2H2-type               |
|         |                                                          |                |                                                  | 2642686        | Zinc finger, C2H2-type               |
|         |                                                          |                |                                                  | <b>2645097</b> | Zinc finger, CCHC-type               |
|         |                                                          |                |                                                  | 2646024        | Zinc finger, CCHC                    |
|         |                                                          |                |                                                  | <b>2128569</b> | Transcription factor, MADS-box       |
|         |                                                          |                |                                                  | <b>2682446</b> | SANT, DNA-binding                    |

|  |  |                |                                      |
|--|--|----------------|--------------------------------------|
|  |  | 2690968        | Nuclease                             |
|  |  | <b>2696654</b> | Homeodomain                          |
|  |  | <b>2645990</b> | High mobility group box, HMG1/HMG2   |
|  |  | 2693949        | Homeodomain                          |
|  |  | <b>2616096</b> | Fungal specific transcription factor |
|  |  | <b>2663876</b> | HMG-I and HMG-Y, DNA-binding         |
|  |  | <b>2615463</b> | Zn2Cys6                              |
|  |  | <b>2486034</b> | Zinc finger, GATA-type               |

---

***Δwc-2 and Δhom2***

|  |                |                                      |
|--|----------------|--------------------------------------|
|  | <b>2630358</b> | Zinc finger, C2H2-type               |
|  | <b>2525437</b> | Fungal specific transcription factor |
|  | 2601101        | Zinc finger, C2H2-type               |
|  | 2623333        | High mobility group box, HMG1/HMG2   |

---

***Δhom2 and Δfst4***

|  |                |                                                  |
|--|----------------|--------------------------------------------------|
|  | <b>2731703</b> | Jumonji                                          |
|  | 1194438        | Lambda repressor-like, DNA-binding               |
|  | <b>2620880</b> | Fungal specific transcription factor             |
|  | <b>2668417</b> | Basic-leucine zipper (bZIP) transcription factor |

---

***Δwc-2 and Δhom2 and Δfst4***

|  |         |                        |
|--|---------|------------------------|
|  | 2703923 | Zinc finger, C2H2-type |
|  | 2519514 | TEA/ATTS               |

Analysis has been performed in version 3 of the *S. commune* genome annotation (<http://genome.jgi.doe.gov/Schco3>). Transcription factors are categorized into groups up- or downregulated exclusive or mutual to deletion strains. ProteinIDs in bold exist only once in this list.

**Supplementary Table S6.** Primers used in this study.

|              |                                 |
|--------------|---------------------------------|
| Δ2519514ufw  | GGCCTAATAGGCTAGAAATGCGCTCTCCGTC |
| Δ2519514urv  | GGCCTCGCAGGCCAGGGAGGATGACGCAAAG |
| Δ2519514dfw  | GGCCTGCGAGGCCGTCCGTGTTCTTGGATAC |
| Δ2519514drv  | GGCCTATTAGGCCGTGCGTTGTTTCGTTTCC |
| 2519514ufcfr | TCCACGCTGGCTGAATAG              |
| 2519514dfcfr | TCGATGTGAGGTAAGTCTGTC           |
| nourdelrev   | TAAGCCGTGTCGTCA                 |
| sc3tersqf    | CCGGGAATTCCAGAT                 |
| Δ2703923ufw  | GGCCTAATAGGCCCTGTCACGCACCAGTACG |
| Δ2703923urv  | GGCCTCGCAGGCCGGGCGAACGTGAGATAAG |
| Δ2703923dfw  | GGCCTGCGAGGCCGTGTGGACGGTCTTAAC  |
| Δ2703923drv  | GGCCTATTAGGCCATTGACGAGTCCATTC   |
| c2h2dufcfr   | AACGAGGGTCGTTGTATC              |
| c2h2ddfcfr   | GATGAAGACGCCCTCAATCG            |
| hom2rtfw     | GAGAGGTGTACAGGTCTG              |
| hom2rtrv     | ACTGGTTCGAGGTCATAG              |
| tea1fw1      | CACCTGCTATACATGCAGCGCGACGATAG   |
| tea1rv1      | GGATCCTTAGATCATGAAAGCGCCGCC     |

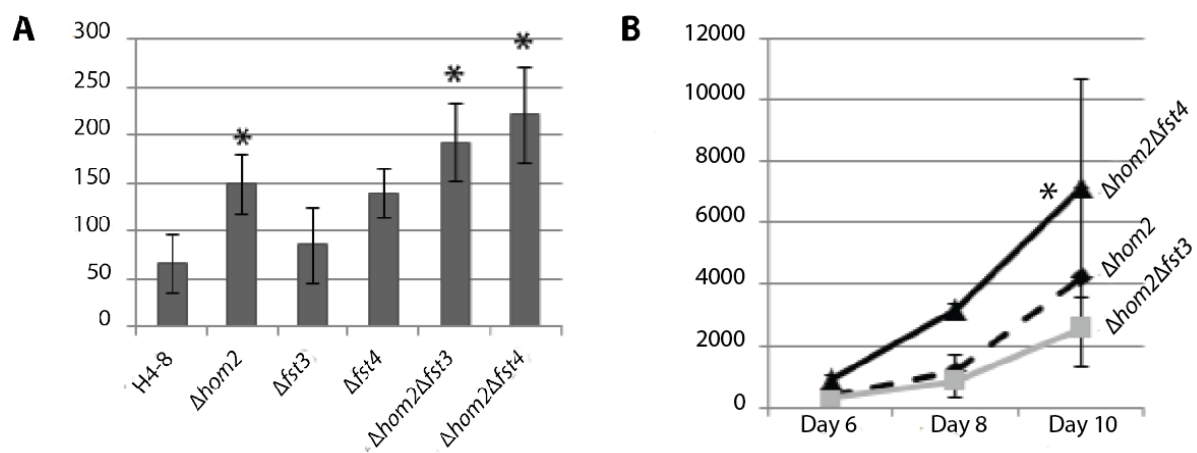

**Supplemental Figure 1.** Transcription factors of *S. commune* that affect biomass formation. Biomass of biological triplicates of 6-day-old dark-grown cultures of the wild-type dikaryon and transcription factor deletion strains that had been grown on agar medium (A) or as liquid shaken cultures (B) using glucose as a carbon source. \*Indicates significant difference with wild-type strain H4-8 (A) or the  $\Delta hom2\Delta hom2$  strain (B).

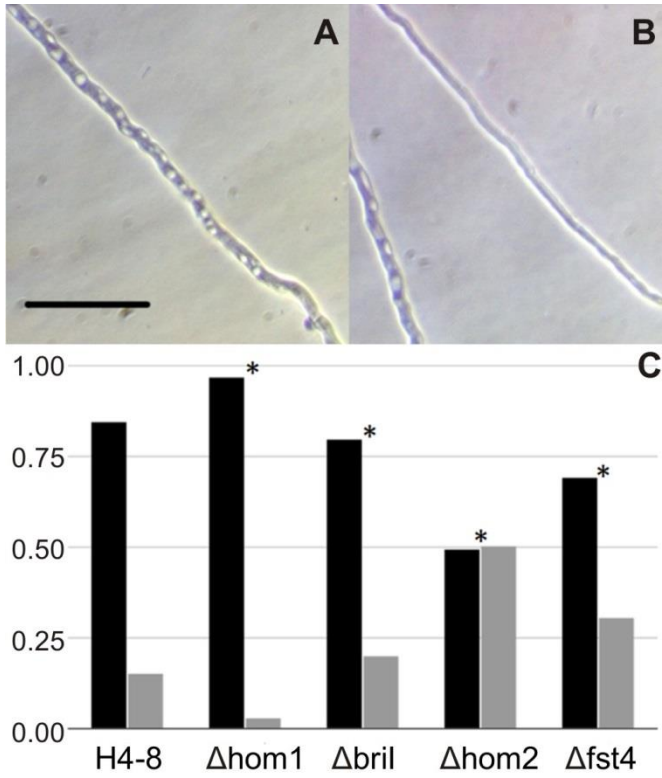

**Supplemental Figure 2.** *S. commune* forms vacuole-rich wide hyphae (A, B) and thin hyphae with few vacuoles (B). The ratio between the abundance of these hyphae differs between dikaryotic wild-type and the TF deletion strains when cultures were grown in the dark. \* indicates significant difference ( $p < 0,05$ ) using a  $\chi^2$  test. Bar represents 100  $\mu\text{m}$ .



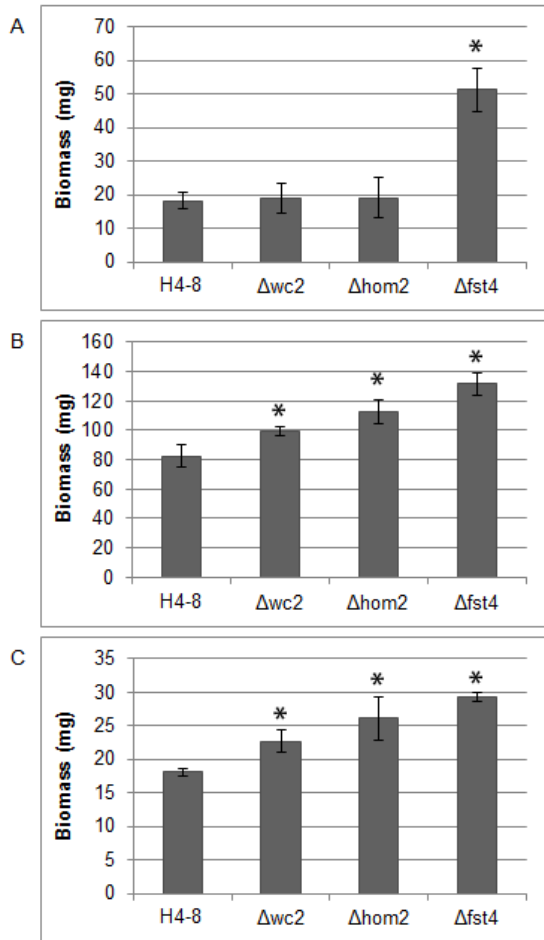

**Supplementary Figure 3.** Biomass of biological triplicates of 6-day-old dark-grown agar cultures of the wild-type dikaryon and transcription factor deletion strains using xylose (A), sucrose (B), and pectin (C) as carbon source. \*Indicates significant difference with wild-type strain H4-8.

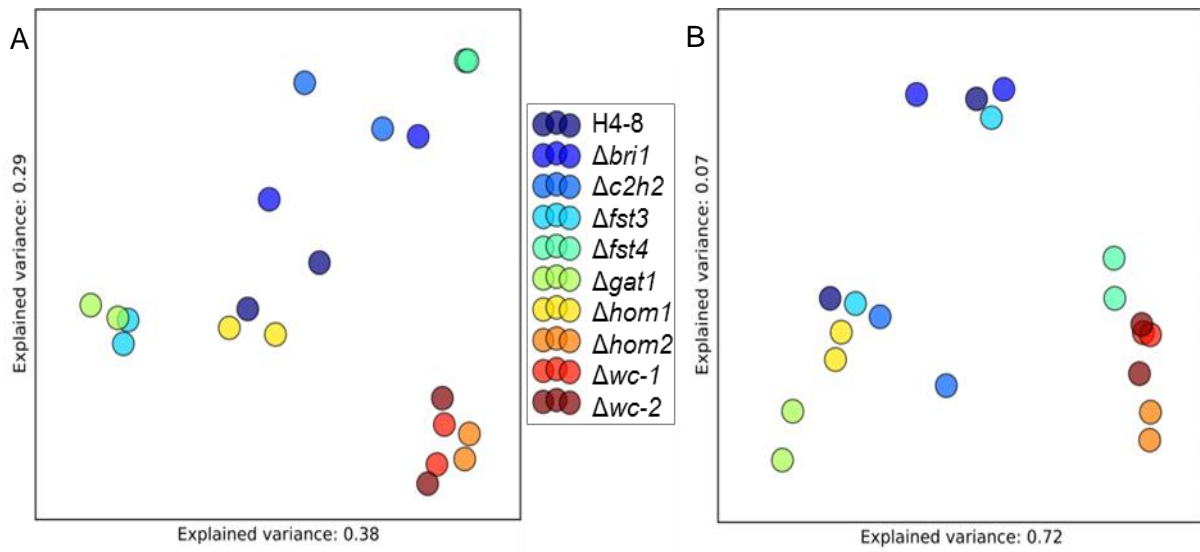

**Supplementary Figure 4.** Principal component analysis of whole genome expression profiles of biological duplicates of the transcription factor deletion strains of *S. commune* during aggregation (A) and fruiting body formation (B).

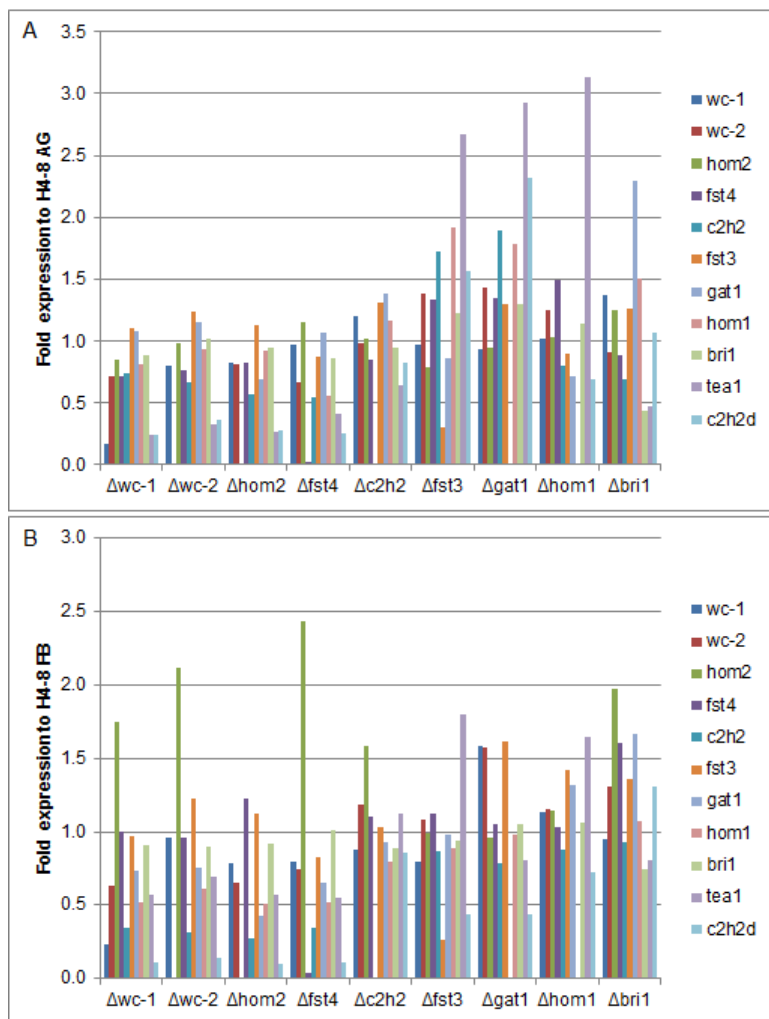

**Supplementary Figure 5.** Expression analysis of transcription factor deletion strains of *S. commune*. Expression of *wc-1*, *wc-2*, *hom2*, *fst4*, *c2h2*, *fst3*, *gat1*, *hom1*, *bri1*, *tea1*, and *c2h2d* in dikaryotic transcription factor deletion strains when compared to the wild-type during aggregation (A) and fruiting body formation (B). Analysis is based on biological duplicates.
